# Supplementary material
Source: publisher figshare collection journal article supplement (https://acs.figshare.com/ndownloader/files/3613851)
Supplement: Supplementary file 1 [file 3613851]

data_x1406003
_audit_creation_date              2014-06-12
_audit_creation_method
;
Olex2 1.2
(compiled 2014.05.21 svn.r2940 for OlexSys, GUI svn.r4846)
;
_shelxl_version_number            2014-3
_publ_contact_author_address      ?
_publ_contact_author_email        ?
_publ_contact_author_name         ''
_publ_contact_author_phone        ?
_publ_section_references
;
Bourhis, L.J., Dolomanov, O.V., Gildea, R.J., Howard, J.A.K., Puschmann, H.
 (2013). in preparation.

Dolomanov, O.V., Bourhis, L.J., Gildea, R.J, Howard, J.A.K. & Puschmann, H.
 (2009), J. Appl. Cryst. 42, 339-341.

Sheldrick, G.M. (2008). Acta Cryst. A64, 112-122.
;
_chemical_name_common             ?
_chemical_name_systematic
;
 ?
;
_chemical_formula_moiety          'C18 H18 Br Cl O4'
_chemical_formula_sum             'C18 H18 Br Cl O4'
_chemical_formula_weight          413.68
_chemical_absolute_configuration  ad
_chemical_melting_point           ?
loop_
  _atom_type_symbol
  _atom_type_description
  _atom_type_scat_dispersion_real
  _atom_type_scat_dispersion_imag
  _atom_type_scat_source
 'C' 'C' 0.0181 0.0091 'International Tables Vol C Tables 4.2.6.8 and 6.1.1.4'
 'H' 'H' 0.0000 0.0000 'International Tables Vol C Tables 4.2.6.8 and 6.1.1.4'
 'Br' 'Br' -0.6763 1.2805
 'International Tables Vol C Tables 4.2.6.8 and 6.1.1.4'
 'Cl' 'Cl' 0.3639 0.7018 'International Tables Vol C Tables 4.2.6.8 and 6.1.1.4'
 'O' 'O' 0.0492 0.0322 'International Tables Vol C Tables 4.2.6.8 and 6.1.1.4'

_shelx_space_group_comment
;
The symmetry employed for this shelxl refinement is uniquely defined
by the following loop, which should always be used as a source of
symmetry information in preference to the above space-group names.
They are only intended as comments.
;
_space_group_crystal_system       'monoclinic'
_space_group_IT_number            4
_space_group_name_H-M_alt         'P 1 21 1'
_space_group_name_Hall            'P 2yb'
loop_
  _space_group_symop_operation_xyz
 'x, y, z'
 '-x, y+1/2, -z'

_cell_length_a                    11.2341(4)
_cell_length_b                    5.9399(2)
_cell_length_c                    13.0778(4)
_cell_angle_alpha                 90
_cell_angle_beta                  97.744(2)
_cell_angle_gamma                 90
_cell_volume                      864.72(5)
_cell_formula_units_Z             2
_cell_measurement_reflns_used     9036
_cell_measurement_temperature     100
_cell_measurement_theta_max       68.24
_cell_measurement_theta_min       3.41
_shelx_estimated_absorpt_T_max    0.953
_shelx_estimated_absorpt_T_min    0.220
_exptl_absorpt_coefficient_mu     4.831
_exptl_absorpt_correction_T_max   0.7531
_exptl_absorpt_correction_T_min   0.5475
_exptl_absorpt_correction_type    multi-scan
_exptl_absorpt_process_details
;
SADABS-2012/1 (Bruker,2012) was used for absorption correction.
wR2(int) was 0.1080 before and 0.0603 after correction.
The Ratio of minimum to maximum transmission is 0.7270.
The \l/2 correction factor is 0.0015.
;
_exptl_crystal_colour             'clear colourless'
_exptl_crystal_colour_lustre      clear
_exptl_crystal_colour_primary     colourless
_exptl_crystal_density_diffrn     1.589
_exptl_crystal_density_meas       ?
_exptl_crystal_density_method     ?
_exptl_crystal_description        needle
_exptl_crystal_F_000              420
_exptl_crystal_size_max           0.45
_exptl_crystal_size_mid           0.05
_exptl_crystal_size_min           0.01
_exptl_special_details
;
 ?
;
_exptl_transmission_factor_max    ?
_exptl_transmission_factor_min    ?
_diffrn_reflns_av_R_equivalents   0.0401
_diffrn_reflns_av_unetI/netI      0.0397
_diffrn_reflns_Laue_measured_fraction_full 0.999
_diffrn_reflns_Laue_measured_fraction_max 0.998
_diffrn_reflns_limit_h_max        13
_diffrn_reflns_limit_h_min        -13
_diffrn_reflns_limit_k_max        7
_diffrn_reflns_limit_k_min        -7
_diffrn_reflns_limit_l_max        15
_diffrn_reflns_limit_l_min        -15
_diffrn_reflns_number             12757
_diffrn_reflns_point_group_measured_fraction_full 0.990
_diffrn_reflns_point_group_measured_fraction_max 0.986
_diffrn_reflns_theta_full         67.679
_diffrn_reflns_theta_max          68.290
_diffrn_reflns_theta_min          3.410
_diffrn_ambient_temperature       100
_diffrn_detector_area_resol_mean  ?
_diffrn_measured_fraction_theta_full 0.999
_diffrn_measured_fraction_theta_max 0.998
_diffrn_measurement_device_type   'Bruker APEX-II CCD'
_diffrn_measurement_method        '\f and \w scans'
_diffrn_radiation_type            CuK\a
_diffrn_radiation_wavelength      1.54178
_diffrn_source                    ?
_diffrn_special_details           ?
_diffrn_standards_number          0
_reflns_Friedel_coverage          0.789
_reflns_Friedel_fraction_full     0.978
_reflns_Friedel_fraction_max      0.972
_reflns_number_gt                 2981
_reflns_number_total              3135
_reflns_special_details
;
 Reflections were merged by SHELXL according to the crystal
 class for the calculation of statistics and refinement.
 
 _reflns_Friedel_fraction is defined as the number of unique
 Friedel pairs measured divided by the number that would be
 possible theoretically, ignoring centric projections and
 systematic absences.
;
_reflns_threshold_expression      'I > 2\s(I)'
_computing_cell_refinement        'SAINT v8.34A (Bruker, 2013)'
_computing_data_collection        ?
_computing_data_reduction         'SAINT v8.34A (Bruker, 2013)'
_computing_molecular_graphics     'Olex2 (Dolomanov et al., 2009)'
_computing_publication_material   'Olex2 (Dolomanov et al., 2009)'
_computing_structure_refinement   'XL (Sheldrick, 2008)'
_computing_structure_solution     'olex2.solve (Bourhis et al., 2013)'
_refine_diff_density_max          0.410
_refine_diff_density_min          -0.314
_refine_diff_density_rms          0.057
_refine_ls_abs_structure_details
;
 Flack x determined using 1262 quotients [(I+)-(I-)]/[(I+)+(I-)]
 (Parsons, Flack and Wagner, Acta Cryst. B69 (2013) 249-259).
;
_refine_ls_abs_structure_Flack    0.045(11)
_refine_ls_extinction_coef        .
_refine_ls_extinction_method      none
_refine_ls_goodness_of_fit_ref    1.046
_refine_ls_hydrogen_treatment     mixed
_refine_ls_matrix_type            full
_refine_ls_number_parameters      226
_refine_ls_number_reflns          3135
_refine_ls_number_restraints      1
_refine_ls_R_factor_all           0.0282
_refine_ls_R_factor_gt            0.0259
_refine_ls_restrained_S_all       1.046
_refine_ls_shift/su_max           0.001
_refine_ls_shift/su_mean          0.000
_refine_ls_structure_factor_coef  Fsqd
_refine_ls_weighting_details
'w=1/[\s^2^(Fo^2^)+(0.0334P)^2^] where P=(Fo^2^+2Fc^2^)/3'
_refine_ls_weighting_scheme       calc
_refine_ls_wR_factor_gt           0.0603
_refine_ls_wR_factor_ref          0.0611
_refine_special_details
;
 ?
;
_olex2_refinement_description
;
1. Fixed Uiso
 At 1.2 times of:
  All C(H) groups, All C(H,H) groups
 At 1.5 times of:
  All C(H,H,H) groups
2.a Ternary CH refined with riding coordinates:
 C7(H7), C11(H11)
2.b Secondary CH2 refined with riding coordinates:
 C12(H12A,H12B)
2.c Aromatic/amide H refined with riding coordinates:
 C2(H2A), C3(H3), C5(H5), C6(H6), C14(H14), C15(H15), C16(H16), C17(H17),
 C18(H18)
2.d Idealised Me refined as rotating group:
 C10(H10A,H10B,H10C)
;
_atom_sites_solution_hydrogens    mixed
_atom_sites_solution_primary      iterative
_atom_sites_solution_secondary    ?
loop_
  _atom_site_label
  _atom_site_type_symbol
  _atom_site_fract_x
  _atom_site_fract_y
  _atom_site_fract_z
  _atom_site_U_iso_or_equiv
  _atom_site_adp_type
  _atom_site_occupancy
  _atom_site_site_symmetry_order
  _atom_site_calc_flag
  _atom_site_refinement_flags_posn
  _atom_site_refinement_flags_adp
  _atom_site_refinement_flags_occupancy
  _atom_site_disorder_assembly
  _atom_site_disorder_group
 Br1 Br 0.25053(3) 0.57356(7) 0.70673(3) 0.02138(11) Uani 1 1 d . . . . .
 Cl1 Cl 0.46150(9) 0.8752(2) 1.40724(8) 0.0300(2) Uani 1 1 d . . . . .
 O1 O 0.1031(2) 1.0275(4) 0.9533(2) 0.0180(6) Uani 1 1 d . . . . .
 O2 O 0.2465(3) 0.4740(5) 0.9508(2) 0.0179(6) Uani 1 1 d . . . . .
 O3 O 0.4378(2) 0.7159(4) 0.9309(2) 0.0201(6) Uani 1 1 d . . . . .
 O4 O 0.3292(2) 1.0138(4) 0.8649(2) 0.0178(6) Uani 1 1 d . . . . .
 C1 C 0.3691(3) 0.8639(7) 1.2884(3) 0.0187(8) Uani 1 1 d . . . . .
 C2 C 0.3000(4) 0.6758(7) 1.2640(3) 0.0210(8) Uani 1 1 d . . . . .
 H2A H 0.3005 0.5552 1.3117 0.025 Uiso 1 1 calc R . . . .
 C3 C 0.2291(4) 0.6646(7) 1.1682(3) 0.0186(8) Uani 1 1 d . . . . .
 H3 H 0.1806 0.5356 1.1508 0.022 Uiso 1 1 calc R . . . .
 C4 C 0.2283(3) 0.8406(6) 1.0976(3) 0.0165(8) Uani 1 1 d . . . . .
 C5 C 0.2982(3) 1.0301(6) 1.1257(3) 0.0190(9) Uani 1 1 d . . . . .
 H5 H 0.2974 1.1525 1.0789 0.023 Uiso 1 1 calc R . . . .
 C6 C 0.3688(3) 1.0428(7) 1.2207(3) 0.0214(9) Uani 1 1 d . . . . .
 H6 H 0.4163 1.1725 1.2392 0.026 Uiso 1 1 calc R . . . .
 C7 C 0.1523(3) 0.8205(6) 0.9927(3) 0.0161(8) Uani 1 1 d . . . . .
 H7 H 0.0826 0.7220 1.0028 0.019 Uiso 1 1 calc R . . . .
 C8 C 0.2222(4) 0.6959(6) 0.9139(3) 0.0157(8) Uani 1 1 d . . . . .
 C9 C 0.3430(3) 0.8092(6) 0.9052(3) 0.0149(8) Uani 1 1 d . . . . .
 C10 C 0.4366(3) 1.1145(7) 0.8336(3) 0.0215(9) Uani 1 1 d . . . . .
 H10A H 0.4601 1.0309 0.7749 0.032 Uiso 1 1 calc GR . . . .
 H10B H 0.5020 1.1090 0.8913 0.032 Uiso 1 1 calc GR . . . .
 H10C H 0.4202 1.2716 0.8135 0.032 Uiso 1 1 calc GR . . . .
 C11 C 0.1470(3) 0.6885(7) 0.8062(3) 0.0169(8) Uani 1 1 d . . . . .
 H11 H 0.1221 0.8456 0.7858 0.020 Uiso 1 1 calc R . . . .
 C12 C 0.0347(3) 0.5437(7) 0.8015(3) 0.0203(9) Uani 1 1 d . . . . .
 H12A H 0.0585 0.3882 0.8223 0.024 Uiso 1 1 calc R . . . .
 H12B H -0.0162 0.6024 0.8516 0.024 Uiso 1 1 calc R . . . .
 C13 C -0.0389(3) 0.5377(6) 0.6950(3) 0.0174(8) Uani 1 1 d . . . . .
 C14 C -0.1079(4) 0.7207(7) 0.6586(3) 0.0201(8) Uani 1 1 d . . . . .
 H14 H -0.1088 0.8513 0.7004 0.024 Uiso 1 1 calc R . . . .
 C15 C -0.1763(4) 0.7163(7) 0.5614(3) 0.0239(9) Uani 1 1 d . . . . .
 H15 H -0.2242 0.8423 0.5375 0.029 Uiso 1 1 calc R . . . .
 C16 C -0.1738(4) 0.5274(7) 0.5002(3) 0.0237(10) Uani 1 1 d . . . . .
 H16 H -0.2205 0.5227 0.4340 0.028 Uiso 1 1 calc R . . . .
 C17 C -0.1037(4) 0.3460(7) 0.5351(3) 0.0241(9) Uani 1 1 d . . . . .
 H17 H -0.1009 0.2172 0.4925 0.029 Uiso 1 1 calc R . . . .
 C18 C -0.0370(4) 0.3504(7) 0.6326(3) 0.0219(9) Uani 1 1 d . . . . .
 H18 H 0.0103 0.2236 0.6565 0.026 Uiso 1 1 calc R . . . .
 H1 H 0.155(5) 1.115(11) 0.947(4) 0.048(19) Uiso 1 1 d . . . . .
 H2 H 0.313(4) 0.448(8) 0.948(4) 0.018(13) Uiso 1 1 d . . . . .

loop_
  _atom_site_aniso_label
  _atom_site_aniso_U_11
  _atom_site_aniso_U_22
  _atom_site_aniso_U_33
  _atom_site_aniso_U_23
  _atom_site_aniso_U_13
  _atom_site_aniso_U_12
 Br1 0.02111(18) 0.0275(2) 0.01569(18) -0.00053(19) 0.00317(12) 0.0047(2)
 Cl1 0.0252(5) 0.0432(6) 0.0198(5) -0.0006(5) -0.0037(4) 0.0001(5)
 O1 0.0176(13) 0.0147(17) 0.0219(13) 0.0022(10) 0.0032(11) 0.0039(10)
 O2 0.0204(15) 0.0125(13) 0.0210(16) 0.0049(11) 0.0032(13) 0.0019(12)
 O3 0.0157(13) 0.0213(15) 0.0234(15) 0.0029(12) 0.0028(11) 0.0053(11)
 O4 0.0158(12) 0.0137(15) 0.0243(14) 0.0035(10) 0.0040(11) 0.0011(9)
 C1 0.0139(17) 0.026(2) 0.0154(19) -0.0027(16) 0.0008(15) 0.0040(16)
 C2 0.0225(19) 0.0214(19) 0.020(2) 0.0038(16) 0.0067(16) 0.0019(16)
 C3 0.0207(19) 0.0134(17) 0.022(2) 0.0024(15) 0.0042(16) -0.0033(15)
 C4 0.0153(17) 0.018(2) 0.0177(19) -0.0008(15) 0.0061(15) 0.0041(15)
 C5 0.0224(18) 0.015(2) 0.0203(19) 0.0018(15) 0.0034(15) 0.0016(15)
 C6 0.0201(17) 0.018(2) 0.0257(19) -0.0018(18) 0.0034(15) 0.0003(17)
 C7 0.0172(17) 0.0129(18) 0.0190(19) 0.0015(15) 0.0054(15) 0.0004(14)
 C8 0.0176(19) 0.0111(19) 0.019(2) 0.0010(15) 0.0038(16) 0.0004(15)
 C9 0.0213(19) 0.0116(18) 0.0120(17) -0.0012(14) 0.0025(15) 0.0021(15)
 C10 0.0179(17) 0.018(2) 0.029(2) 0.0037(17) 0.0054(15) -0.0029(16)
 C11 0.0177(18) 0.0176(18) 0.0166(19) 0.0005(15) 0.0068(15) 0.0040(15)
 C12 0.0229(17) 0.020(2) 0.0180(17) 0.0016(17) 0.0034(14) -0.0052(18)
 C13 0.0175(16) 0.016(2) 0.0189(17) 0.0027(16) 0.0032(14) -0.0044(16)
 C14 0.023(2) 0.017(2) 0.022(2) -0.0033(16) 0.0069(17) -0.0023(16)
 C15 0.021(2) 0.022(2) 0.027(2) 0.0015(18) 0.0000(18) 0.0006(17)
 C16 0.0223(18) 0.031(3) 0.0171(18) -0.0019(17) 0.0013(15) -0.0071(17)
 C17 0.027(2) 0.020(2) 0.024(2) -0.0083(17) 0.0028(18) -0.0064(17)
 C18 0.025(2) 0.015(2) 0.026(2) 0.0016(17) 0.0048(17) -0.0016(17)

_geom_special_details
;
 All esds (except the esd in the dihedral angle between two l.s. planes)
 are estimated using the full covariance matrix.  The cell esds are taken
 into account individually in the estimation of esds in distances, angles
 and torsion angles; correlations between esds in cell parameters are only
 used when they are defined by crystal symmetry.  An approximate (isotropic)
 treatment of cell esds is used for estimating esds involving l.s. planes.
;
loop_
  _geom_bond_atom_site_label_1
  _geom_bond_atom_site_label_2
  _geom_bond_distance
  _geom_bond_site_symmetry_2
  _geom_bond_publ_flag
 Br1 C11 1.979(4) . ?
 Cl1 C1 1.750(4) . ?
 O1 C7 1.416(4) . ?
 O1 H1 0.79(6) . ?
 O2 C8 1.418(4) . ?
 O2 H2 0.77(5) . ?
 O3 C9 1.208(5) . ?
 O4 C9 1.326(4) . ?
 O4 C10 1.455(4) . ?
 C1 C2 1.374(6) . ?
 C1 C6 1.383(6) . ?
 C2 H2A 0.9500 . ?
 C2 C3 1.392(6) . ?
 C3 H3 0.9500 . ?
 C3 C4 1.394(5) . ?
 C4 C5 1.393(6) . ?
 C4 C7 1.519(5) . ?
 C5 H5 0.9500 . ?
 C5 C6 1.382(5) . ?
 C6 H6 0.9500 . ?
 C7 H7 1.0000 . ?
 C7 C8 1.563(5) . ?
 C8 C9 1.532(5) . ?
 C8 C11 1.543(5) . ?
 C10 H10A 0.9800 . ?
 C10 H10B 0.9800 . ?
 C10 H10C 0.9800 . ?
 C11 H11 1.0000 . ?
 C11 C12 1.521(5) . ?
 C12 H12A 0.9900 . ?
 C12 H12B 0.9900 . ?
 C12 C13 1.520(5) . ?
 C13 C14 1.382(6) . ?
 C13 C18 1.382(6) . ?
 C14 H14 0.9500 . ?
 C14 C15 1.394(6) . ?
 C15 H15 0.9500 . ?
 C15 C16 1.381(6) . ?
 C16 H16 0.9500 . ?
 C16 C17 1.376(6) . ?
 C17 H17 0.9500 . ?
 C17 C18 1.389(6) . ?
 C18 H18 0.9500 . ?

loop_
  _geom_angle_atom_site_label_1
  _geom_angle_atom_site_label_2
  _geom_angle_atom_site_label_3
  _geom_angle
  _geom_angle_site_symmetry_1
  _geom_angle_site_symmetry_3
  _geom_angle_publ_flag
 C7 O1 H1 111(4) . . ?
 C8 O2 H2 108(4) . . ?
 C9 O4 C10 115.6(3) . . ?
 C2 C1 Cl1 119.1(3) . . ?
 C2 C1 C6 121.6(4) . . ?
 C6 C1 Cl1 119.3(3) . . ?
 C1 C2 H2A 120.5 . . ?
 C1 C2 C3 119.0(4) . . ?
 C3 C2 H2A 120.5 . . ?
 C2 C3 H3 119.6 . . ?
 C2 C3 C4 120.8(4) . . ?
 C4 C3 H3 119.6 . . ?
 C3 C4 C7 119.5(3) . . ?
 C5 C4 C3 118.5(4) . . ?
 C5 C4 C7 122.0(3) . . ?
 C4 C5 H5 119.5 . . ?
 C6 C5 C4 121.1(4) . . ?
 C6 C5 H5 119.5 . . ?
 C1 C6 H6 120.5 . . ?
 C5 C6 C1 119.0(4) . . ?
 C5 C6 H6 120.5 . . ?
 O1 C7 C4 113.9(3) . . ?
 O1 C7 H7 106.4 . . ?
 O1 C7 C8 112.2(3) . . ?
 C4 C7 H7 106.4 . . ?
 C4 C7 C8 111.1(3) . . ?
 C8 C7 H7 106.4 . . ?
 O2 C8 C7 107.9(3) . . ?
 O2 C8 C9 107.6(3) . . ?
 O2 C8 C11 109.9(3) . . ?
 C9 C8 C7 111.7(3) . . ?
 C9 C8 C11 109.0(3) . . ?
 C11 C8 C7 110.7(3) . . ?
 O3 C9 O4 125.7(4) . . ?
 O3 C9 C8 122.3(3) . . ?
 O4 C9 C8 112.0(3) . . ?
 O4 C10 H10A 109.5 . . ?
 O4 C10 H10B 109.5 . . ?
 O4 C10 H10C 109.5 . . ?
 H10A C10 H10B 109.5 . . ?
 H10A C10 H10C 109.5 . . ?
 H10B C10 H10C 109.5 . . ?
 Br1 C11 H11 108.4 . . ?
 C8 C11 Br1 108.2(3) . . ?
 C8 C11 H11 108.4 . . ?
 C12 C11 Br1 109.6(3) . . ?
 C12 C11 C8 113.7(3) . . ?
 C12 C11 H11 108.4 . . ?
 C11 C12 H12A 108.9 . . ?
 C11 C12 H12B 108.9 . . ?
 H12A C12 H12B 107.7 . . ?
 C13 C12 C11 113.3(3) . . ?
 C13 C12 H12A 108.9 . . ?
 C13 C12 H12B 108.9 . . ?
 C14 C13 C12 120.5(4) . . ?
 C18 C13 C12 120.7(4) . . ?
 C18 C13 C14 118.8(4) . . ?
 C13 C14 H14 119.5 . . ?
 C13 C14 C15 121.0(4) . . ?
 C15 C14 H14 119.5 . . ?
 C14 C15 H15 120.3 . . ?
 C16 C15 C14 119.5(4) . . ?
 C16 C15 H15 120.3 . . ?
 C15 C16 H16 120.0 . . ?
 C17 C16 C15 119.9(4) . . ?
 C17 C16 H16 120.0 . . ?
 C16 C17 H17 119.9 . . ?
 C16 C17 C18 120.3(4) . . ?
 C18 C17 H17 119.9 . . ?
 C13 C18 C17 120.5(4) . . ?
 C13 C18 H18 119.7 . . ?
 C17 C18 H18 119.7 . . ?

loop_
  _geom_hbond_atom_site_label_D
  _geom_hbond_atom_site_label_H
  _geom_hbond_atom_site_label_A
  _geom_hbond_distance_DH
  _geom_hbond_distance_HA
  _geom_hbond_distance_DA
  _geom_hbond_angle_DHA
  _geom_hbond_site_symmetry_A
 O2 H2 O3 0.77(5) 2.15(5) 2.627(4) 121(4) .

loop_
  _geom_torsion_atom_site_label_1
  _geom_torsion_atom_site_label_2
  _geom_torsion_atom_site_label_3
  _geom_torsion_atom_site_label_4
  _geom_torsion
  _geom_torsion_site_symmetry_1
  _geom_torsion_site_symmetry_2
  _geom_torsion_site_symmetry_3
  _geom_torsion_site_symmetry_4
  _geom_torsion_publ_flag
 Br1 C11 C12 C13 -58.8(4) . . . . ?
 Cl1 C1 C2 C3 -178.2(3) . . . . ?
 Cl1 C1 C6 C5 178.2(3) . . . . ?
 O1 C7 C8 O2 -168.3(3) . . . . ?
 O1 C7 C8 C9 73.7(4) . . . . ?
 O1 C7 C8 C11 -48.0(4) . . . . ?
 O2 C8 C9 O3 -2.7(5) . . . . ?
 O2 C8 C9 O4 175.9(3) . . . . ?
 O2 C8 C11 Br1 -69.9(4) . . . . ?
 O2 C8 C11 C12 52.1(5) . . . . ?
 C1 C2 C3 C4 0.3(6) . . . . ?
 C2 C1 C6 C5 -0.9(6) . . . . ?
 C2 C3 C4 C5 -1.3(6) . . . . ?
 C2 C3 C4 C7 178.5(4) . . . . ?
 C3 C4 C5 C6 1.2(6) . . . . ?
 C3 C4 C7 O1 146.0(3) . . . . ?
 C3 C4 C7 C8 -86.2(4) . . . . ?
 C4 C5 C6 C1 -0.1(6) . . . . ?
 C4 C7 C8 O2 63.0(4) . . . . ?
 C4 C7 C8 C9 -55.1(4) . . . . ?
 C4 C7 C8 C11 -176.7(3) . . . . ?
 C5 C4 C7 O1 -34.2(5) . . . . ?
 C5 C4 C7 C8 93.6(4) . . . . ?
 C6 C1 C2 C3 0.8(6) . . . . ?
 C7 C4 C5 C6 -178.6(3) . . . . ?
 C7 C8 C9 O3 115.5(4) . . . . ?
 C7 C8 C9 O4 -65.8(4) . . . . ?
 C7 C8 C11 Br1 171.0(2) . . . . ?
 C7 C8 C11 C12 -66.9(4) . . . . ?
 C8 C11 C12 C13 180.0(3) . . . . ?
 C9 C8 C11 Br1 47.8(4) . . . . ?
 C9 C8 C11 C12 169.8(3) . . . . ?
 C10 O4 C9 O3 11.1(5) . . . . ?
 C10 O4 C9 C8 -167.5(3) . . . . ?
 C11 C8 C9 O3 -121.8(4) . . . . ?
 C11 C8 C9 O4 56.8(4) . . . . ?
 C11 C12 C13 C14 -74.8(4) . . . . ?
 C11 C12 C13 C18 104.6(4) . . . . ?
 C12 C13 C14 C15 -179.6(4) . . . . ?
 C12 C13 C18 C17 -179.6(4) . . . . ?
 C13 C14 C15 C16 -0.8(6) . . . . ?
 C14 C13 C18 C17 -0.2(6) . . . . ?
 C14 C15 C16 C17 -0.3(6) . . . . ?
 C15 C16 C17 C18 1.1(6) . . . . ?
 C16 C17 C18 C13 -0.9(6) . . . . ?
 C18 C13 C14 C15 1.0(6) . . . . ?

_shelx_res_file
;
TITL
CELL 1.54178 11.2341 5.9399 13.0778 90 97.744 90
ZERR 2 0.0004 0.0002 0.0004 0 0.0023 0
LATT -1
SYMM -X,0.5+Y,-Z

SFAC C H Br Cl O
UNIT 36 36 2 2 8

L.S. 10 0 0
PLAN  5
SIZE 0.01 0.05 0.45
TEMP -173.15
HTAB O2 O3
MORE -1
BOND $H
CONF
fmap 2 53
acta
REM <HKL>C:/Users/pwhite/My%20Structures/UNC/Johnson/x1406003/x1406003.hkl</HKL>

WGHT    0.033400
FVAR       0.18382
BR1   3    0.250528    0.573561    0.706732    11.00000    0.02111    0.02752 =
         0.01569   -0.00053    0.00317    0.00466
CL1   4    0.461504    0.875206    1.407237    11.00000    0.02518    0.04315 =
         0.01982   -0.00057   -0.00370    0.00005
O1    5    0.103125    1.027487    0.953257    11.00000    0.01765    0.01467 =
         0.02195    0.00225    0.00315    0.00392
O2    5    0.246522    0.473958    0.950769    11.00000    0.02036    0.01251 =
         0.02095    0.00491    0.00315    0.00193
O3    5    0.437841    0.715943    0.930936    11.00000    0.01573    0.02129 =
         0.02337    0.00295    0.00276    0.00534
O4    5    0.329174    1.013779    0.864852    11.00000    0.01583    0.01371 =
         0.02435    0.00351    0.00403    0.00112
C1    1    0.369140    0.863893    1.288381    11.00000    0.01389    0.02637 =
         0.01543   -0.00270    0.00079    0.00403
C2    1    0.299981    0.675808    1.263973    11.00000    0.02248    0.02143 =
         0.02013    0.00382    0.00674    0.00193
AFIX  43
H2A   2    0.300512    0.555163    1.311721    11.00000   -1.20000
AFIX   0
C3    1    0.229087    0.664634    1.168197    11.00000    0.02074    0.01345 =
         0.02205    0.00238    0.00417   -0.00332
AFIX  43
H3    2    0.180645    0.535556    1.150776    11.00000   -1.20000
AFIX   0
C4    1    0.228332    0.840589    1.097552    11.00000    0.01533    0.01760 =
         0.01775   -0.00077    0.00609    0.00410
C5    1    0.298248    1.030078    1.125726    11.00000    0.02238    0.01453 =
         0.02029    0.00180    0.00344    0.00159
AFIX  43
H5    2    0.297427    1.152526    1.078905    11.00000   -1.20000
AFIX   0
C6    1    0.368792    1.042799    1.220703    11.00000    0.02007    0.01843 =
         0.02565   -0.00185    0.00340    0.00032
AFIX  43
H6    2    0.416319    1.172525    1.239191    11.00000   -1.20000
AFIX   0
C7    1    0.152313    0.820488    0.992684    11.00000    0.01725    0.01285 =
         0.01899    0.00152    0.00539    0.00036
AFIX  13
H7    2    0.082634    0.722021    1.002759    11.00000   -1.20000
AFIX   0
C8    1    0.222235    0.695928    0.913933    11.00000    0.01755    0.01114 =
         0.01874    0.00103    0.00375    0.00043
C9    1    0.343000    0.809160    0.905202    11.00000    0.02127    0.01155 =
         0.01198   -0.00123    0.00250    0.00212
C10   1    0.436632    1.114512    0.833570    11.00000    0.01794    0.01802 =
         0.02907    0.00374    0.00545   -0.00287
AFIX 137
H10A  2    0.460150    1.030883    0.774877    11.00000   -1.50000
H10B  2    0.501967    1.108963    0.891296    11.00000   -1.50000
H10C  2    0.420177    1.271557    0.813463    11.00000   -1.50000
AFIX   0
C11   1    0.146999    0.688539    0.806168    11.00000    0.01774    0.01763 =
         0.01661    0.00054    0.00683    0.00396
AFIX  13
H11   2    0.122059    0.845646    0.785834    11.00000   -1.20000
AFIX   0
C12   1    0.034675    0.543740    0.801459    11.00000    0.02289    0.02007 =
         0.01802    0.00158    0.00342   -0.00521
AFIX  23
H12A  2    0.058531    0.388214    0.822341    11.00000   -1.20000
H12B  2   -0.016222    0.602403    0.851638    11.00000   -1.20000
AFIX   0
C13   1   -0.038855    0.537729    0.695006    11.00000    0.01750    0.01601 =
         0.01886    0.00267    0.00320   -0.00439
C14   1   -0.107932    0.720667    0.658581    11.00000    0.02283    0.01670 =
         0.02189   -0.00328    0.00695   -0.00232
AFIX  43
H14   2   -0.108830    0.851284    0.700390    11.00000   -1.20000
AFIX   0
C15   1   -0.176299    0.716301    0.561393    11.00000    0.02146    0.02231 =
         0.02690    0.00153    0.00005    0.00064
AFIX  43
H15   2   -0.224225    0.842299    0.537468    11.00000   -1.20000
AFIX   0
C16   1   -0.173830    0.527417    0.500155    11.00000    0.02226    0.03132 =
         0.01712   -0.00188    0.00126   -0.00713
AFIX  43
H16   2   -0.220472    0.522710    0.433960    11.00000   -1.20000
AFIX   0
C17   1   -0.103709    0.346002    0.535148    11.00000    0.02736    0.02037 =
         0.02426   -0.00834    0.00281   -0.00640
AFIX  43
H17   2   -0.100929    0.217218    0.492460    11.00000   -1.20000
AFIX   0
C18   1   -0.036984    0.350354    0.632599    11.00000    0.02463    0.01549 =
         0.02607    0.00159    0.00481   -0.00161
AFIX  43
H18   2    0.010298    0.223563    0.656533    11.00000   -1.20000
AFIX   0
H1    2    0.154567    1.114738    0.947254    11.00000    0.04753
H2    2    0.312779    0.448398    0.948086    11.00000    0.01845
HKLF 4

REM
REM R1 =  0.0259 for    2981 Fo > 4sig(Fo)  and  0.0282 for all    3135 data
REM    226 parameters refined using      1 restraints

END

WGHT      0.0334      0.0000

REM Highest difference peak  0.410,  deepest hole -0.314,  1-sigma level  0.057
Q1    1   0.2064  0.6058  0.6406  11.00000  0.05    0.41
Q2    1   0.3222  0.5726  0.6880  11.00000  0.05    0.41
Q3    1   0.1816  0.5699  0.7387  11.00000  0.05    0.39
Q4    1   0.2859  0.4915  0.7641  11.00000  0.05    0.38
Q5    1   0.2886  0.6700  0.7627  11.00000  0.05    0.29
;
_shelx_res_checksum               660
_shelx_hkl_file
;
   1   0   0    0.99    0.27
   1   0   0    0.47    0.15
   1   0   0    0.61    0.14
   1   0   0    0.66    0.14
   1   0   0    1.14    0.25
   1   0   0    1.09    0.19
   1   0   0    0.57    0.13
  -1   0   0    0.58    0.15
  -1   0   0    0.67    0.14
  -1   0   0    0.94    0.21
  -1   0   0    0.55    0.13
  -1   0   0    0.87    0.17
  -2   0   0  183.62    8.67
   2   0   0  180.94    8.02
  -2   0   0  173.42    8.59
   2   0   0  178.35    8.82
   2   0   0  162.23    8.65
  -2   0   0  179.92    7.42
   2   0   0  180.55    7.40
  -2   0   0  180.97    8.09
  -3   0   0   12.59    0.94
  -3   0   0   11.81    0.87
   3   0   0   12.28    0.87
   3   0   0   11.95    0.72
   3   0   0   11.70    0.76
  -3   0   0   11.51    0.79
   3   0   0   12.04    1.16
  -3   0   0   11.61    0.78
   4   0   0   88.93    5.14
   4   0   0   91.50    4.15
  -4   0   0   93.49    4.90
  -4   0   0   95.39    4.71
   4   0   0   93.06    4.32
  -4   0   0   90.55    4.17
  -4   0   0   93.27    4.53
  -5   0   0    1.87    0.54
   5   0   0    1.87    0.81
   5   0   0    2.27    0.49
  -5   0   0    2.13    0.55
   6   0   0   58.50    4.02
   6   0   0   60.69    3.13
  -6   0   0   59.65    2.99
  -6   0   0   61.13    3.39
  -6   0   0   62.83    3.75
  -7   0   0   -0.02    0.43
   7   0   0    0.75    0.85
  -7   0   0    0.50    0.52
  -7   0   0    1.23    0.48
   7   0   0   -0.12    0.54
   7   0   0    0.61    0.51
   8   0   0   24.32    1.38
   8   0   0   23.74    2.63
  -8   0   0   24.42    1.60
  -8   0   0   23.92    1.65
  -8   0   0   18.94    1.90
   8   0   0   23.89    1.71
   9   0   0   18.20    1.60
   9   0   0   17.32    1.61
   9   0   0   18.48    1.50
   9   0   0   18.86    1.29
  10   0   0   70.10    3.55
  10   0   0   69.79    3.24
  10   0   0   67.19    3.66
  11   0   0    1.12    0.59
  11   0   0    0.74    0.47
 -11   0   0    1.06    0.57
  11   0   0    0.73    0.56
  11   0   0    0.92    0.58
  12   0   0    3.38    0.55
  12   0   0    2.65    0.58
  12   0   0    2.46    0.84
  12   0   0    3.61    0.69
  12   0   0    2.99    0.64
 -13   0   0    0.98    0.48
  13   0   0    1.36    0.53
  13   0   0    0.84    0.37
  13   0   0    1.57    0.42
   0  -1   0   -0.17    0.11
   0  -1   0   -0.22    0.11
   0   1   0   -0.01    0.12
   0   1   0    0.00    0.29
   0   1   0   -0.11    0.12
   0   1   0   -0.04    0.12
   1  -1   0  212.95   10.32
  -1  -1   0  202.07    8.02
  -1  -1   0  201.82   10.31
   1  -1   0  200.86   10.31
   1  -1   0  199.24    9.65
  -1   1   0  227.75    8.90
  -1   1   0  227.38   10.32
   1   1   0  207.84   10.48
  -1   1   0  223.38    8.09
   1   1   0  219.80    8.79
   1   1   0  220.79    8.04
   1   1   0  226.09    8.81
   2  -1   0   13.18    0.94
   2  -1   0   12.22    0.89
   2  -1   0   13.02    0.82
   2  -1   0   12.86    0.81
   2  -1   0   13.33    0.80
  -2  -1   0   13.44    0.91
  -2   1   0   14.24    0.85
  -2   1   0   14.25    0.92
   2   1   0   13.57    0.70
   2   1   0   12.04    1.06
  -2   1   0   13.21    0.80
  -2   1   0   12.86    0.75
   2   1   0   13.03    0.70
  -3  -1   0  366.12   15.83
  -3  -1   0  324.54   17.12
   3  -1   0  371.16   18.43
  -3  -1   0  393.77   18.40
   3  -1   0  383.26   15.80
   3  -1   0  386.40   16.08
  -3   1   0  404.06   18.41
  -3   1   0  383.63   14.82
  -3   1   0  398.84   17.23
   3   1   0  370.42   15.68
   3   1   0  393.11   15.67
   4  -1   0    7.89    0.68
   4  -1   0    8.93    0.87
  -4  -1   0    8.61    0.87
   4  -1   0    9.73    0.80
   4  -1   0    8.63    0.75
  -4   1   0    6.65    0.69
  -4   1   0    6.73    0.70
  -4   1   0    7.15    0.74
   4   1   0    5.51    1.11
  -4   1   0    6.55    0.78
   4   1   0    6.82    0.60
   5  -1   0  158.22    7.00
  -5  -1   0  160.06    8.16
   5  -1   0  160.06    7.41
  -5  -1   0  144.59    7.78
   5  -1   0  163.01    8.54
   5  -1   0  158.87    8.08
  -5   1   0  152.85    8.12
  -5   1   0  158.47    7.54
   5   1   0  154.88    6.85
   6  -1   0    8.95    0.82
   6  -1   0    8.18    1.39
  -6  -1   0    8.25    0.89
  -6   1   0    9.39    1.02
   6   1   0    8.94    0.86
   6   1   0    9.77    1.47
  -7  -1   0   97.05    4.55
   7  -1   0   85.87    5.90
   7  -1   0   97.71    4.77
  -7   1   0   96.81    5.07
   7   1   0   98.02    4.68
   7   1   0   98.58    6.03
   7   1   0   93.52    4.46
   8  -1   0   11.02    2.10
  -8  -1   0   12.76    1.19
   8   1   0   11.97    1.25
   8   1   0   11.94    1.00
   8   1   0   11.04    1.25
   8   1   0   12.41    1.01
   8   1   0   11.86    1.96
   8   1   0   13.34    1.10
   8   1   0   13.40    1.36
  -9  -1   0   46.93    2.70
   9  -1   0   45.85    2.46
  -9  -1   0   45.36    2.51
   9   1   0   49.77    2.82
   9   1   0   45.95    2.82
   9   1   0   50.16    2.38
  -9   1   0   44.22    2.61
   9   1   0   48.53    2.55
   9   1   0   48.32    2.14
   9   1   0   47.37    2.58
   9   1   0   48.89    2.39
   9   1   0   43.99    2.25
  10  -1   0    2.68    0.81
 -10  -1   0    2.49    0.90
 -10  -1   0    1.48    0.71
  10  -1   0    1.24    0.52
  10  -1   0    1.48    0.58
  10   1   0    3.04    0.89
  10   1   0    2.73    0.63
  10   1   0    2.10    0.61
  10   1   0    2.82    0.76
  10   1   0    2.85    0.63
  10   1   0    2.51    0.69
  10   1   0    1.78    0.63
  10   1   0    2.37    0.68
 -11  -1   0   30.16    2.00
  11  -1   0   26.30    1.97
  11   1   0   26.42    1.56
 -11   1   0   28.24    1.89
  11   1   0   27.12    1.53
  11   1   0   31.43    1.69
  11   1   0   30.24    2.12
  11   1   0   29.83    1.82
  11   1   0   31.32    2.03
  12  -1   0    2.70    0.66
 -12  -1   0    3.38    0.71
  12  -1   0    2.96    0.75
  12  -1   0    4.08    0.82
  12   1   0    3.19    0.69
  12   1   0    3.43    0.54
 -12   1   0    3.44    0.62
  12   1   0    3.80    0.57
  12   1   0    3.60    0.60
  13  -1   0    8.16    0.90
  13  -1   0    7.10    0.80
  13  -1   0    8.49    0.74
 -13   1   0    8.50    0.72
  13   1   0    7.15    0.62
  13   1   0    8.85    0.84
   0  -2   0  101.46    5.43
   0   2   0  107.89    5.78
   0   2   0  115.06    4.71
   0   2   0  116.52    4.34
   1  -2   0    6.64    0.52
  -1  -2   0    6.82    0.62
   1  -2   0    6.83    0.58
   1  -2   0    7.32    0.50
   1   2   0    6.95    0.51
  -1   2   0    6.27    0.60
   1   2   0    6.49    0.48
   1   2   0    6.56    0.87
   1   2   0    6.51    0.46
  -1   2   0    7.07    0.53
  -1   2   0    6.08    0.52
   2  -2   0  156.75    8.05
  -2  -2   0  165.18    8.07
   2  -2   0  158.96    8.09
   2  -2   0  157.84    7.54
   2  -2   0  162.62    7.07
  -2   2   0  166.15    6.99
   2   2   0  166.74    6.84
  -2   2   0  172.02    8.10
  -2   2   0  165.03    6.54
   2   2   0  157.29    8.39
  -2   2   0  162.28    6.36
   2   2   0  160.54    6.79
   3  -2   0   44.60    2.20
   3  -2   0   42.42    2.21
   3  -2   0   42.48    2.25
  -3  -2   0   44.53    2.47
   3  -2   0   44.92    2.50
  -3   2   0   39.60    1.96
   3   2   0   40.03    2.73
  -3   2   0   41.91    2.43
   3   2   0   38.49    1.93
  -3   2   0   40.17    2.14
   3   2   0   40.75    1.94
  -3   2   0   40.01    2.00
  -4  -2   0   82.47    4.42
   4  -2   0   76.79    3.89
   4  -2   0   80.87    3.89
   4  -2   0   76.56    4.06
   4  -2   0   79.55    4.40
  -4   2   0   80.90    4.38
   4   2   0   74.83    4.70
   4   2   0   80.24    3.57
  -4   2   0   82.93    3.61
  -4   2   0   81.81    3.49
  -4   2   0   78.86    3.83
   5  -2   0    4.32    0.80
  -5  -2   0    2.88    0.69
   5  -2   0    3.57    0.86
   5  -2   0    4.38    0.65
  -5   2   0    5.40    0.89
  -5   2   0    6.52    0.92
  -5   2   0    4.86    0.74
   5   2   0    4.31    0.53
   5   2   0    3.21    0.98
  -5   2   0    4.41    0.72
  -5   2   0    4.75    0.73
   6  -2   0   46.56    3.04
   6  -2   0   48.58    2.70
   6   2   0   46.93    2.39
  -6   2   0   45.23    2.40
   6   2   0   44.56    2.48
   6   2   0   46.49    3.51
  -6   2   0   37.59    2.49
   7  -2   0    3.56    1.21
  -7  -2   0    7.15    0.81
   7  -2   0    7.26    0.94
   7   2   0    7.94    0.89
   7   2   0    7.50    1.05
   7   2   0    7.02    0.77
   7   2   0    4.33    1.34
   7   2   0    7.58    0.84
  -7   2   0    6.38    0.93
  -8  -2   0   21.94    1.59
   8   2   0   21.98    1.35
   8   2   0   22.29    1.36
   8   2   0   21.47    1.44
   8   2   0   22.60    1.30
   8   2   0   20.83    1.34
   8   2   0   19.49    1.69
   9  -2   0    2.33    0.71
  -9  -2   0    1.98    0.67
   9   2   0    1.75    0.55
   9   2   0    1.16    0.68
   9   2   0    2.02    0.53
  -9   2   0    1.77    0.57
   9   2   0    1.16    0.60
   9   2   0    1.76    0.52
   9   2   0    1.09    0.51
   9   2   0    1.27    0.49
 -10  -2   0    8.91    1.10
  10  -2   0    7.87    0.99
 -10  -2   0   10.39    1.25
  10   2   0    7.91    0.95
  10   2   0    7.30    0.88
  10   2   0    9.41    0.92
  10   2   0    8.23    1.06
  10   2   0   10.07    0.94
  10   2   0    9.42    1.28
 -10   2   0    7.58    0.96
  10   2   0    8.84    0.88
  11  -2   0    1.51    0.73
 -11  -2   0    2.27    0.78
 -11  -2   0    2.79    1.07
  11  -2   0    1.99    0.53
 -11   2   0    1.30    0.42
  11   2   0    1.53    0.52
  11   2   0    1.79    0.52
  11   2   0    1.27    0.54
  11   2   0    1.37    0.42
  11   2   0    1.86    0.39
  11   2   0    1.70    0.77
  11   2   0    1.80    0.62
  11   2   0    1.96    0.54
  12  -2   0   17.83    1.44
 -12  -2   0   17.85    1.38
  12   2   0   19.46    1.26
  12   2   0   18.80    1.30
  12   2   0   18.87    1.18
  12   2   0   16.88    1.20
 -12   2   0   18.72    1.08
   0  -3   0   -0.08    0.18
   0   3   0   -0.14    0.18
   1  -3   0   18.26    1.17
  -1   3   0   20.51    1.21
  -1   3   0   21.24    1.15
  -1   3   0   21.02    1.21
   1   3   0   20.88    1.09
   1   3   0   20.94    1.82
   2  -3   0    2.31    0.50
   2  -3   0    2.02    0.66
   2  -3   0    1.93    0.54
   2   3   0    1.26    0.27
  -2   3   0    1.76    0.39
  -2   3   0    1.43    0.38
  -2   3   0    1.75    0.44
   2   3   0    1.25    0.66
   3  -3   0   40.31    2.28
   3  -3   0   41.78    2.27
   3  -3   0   38.48    2.57
   3   3   0   40.48    2.96
  -3   3   0   40.57    2.07
  -3   3   0   40.53    2.08
   3   3   0   40.35    1.92
  -3   3   0   41.49    2.24
   4  -3   0    8.57    0.94
   4  -3   0    7.36    1.08
   4  -3   0    8.01    0.96
   4   3   0    6.11    1.37
  -4   3   0    7.39    0.85
   4   3   0    6.88    0.66
  -4   3   0    6.86    0.81
   4   3   0    7.17    0.98
  -4   3   0    7.24    0.85
   5  -3   0   60.19    3.71
   5  -3   0   61.43    3.50
   5  -3   0   59.27    3.30
   5  -3   0   60.59    3.29
   5   3   0   56.19    3.09
   5   3   0   56.62    4.18
  -5   3   0   58.77    3.08
  -5   3   0   56.97    3.25
   6  -3   0    0.53    0.65
   6  -3   0    0.89    0.58
   6   3   0    1.41    0.59
   6   3   0    0.91    1.15
   6   3   0    0.81    0.35
   6   3   0    1.02    0.39
   6   3   0    1.14    0.55
  -7  -3   0   19.66    1.44
   7  -3   0   20.62    1.87
   7   3   0   19.57    1.71
  -7   3   0   17.33    1.66
   7   3   0   19.81    1.15
   7   3   0   19.22    1.16
   7   3   0   16.86    1.23
   8  -3   0    1.83    0.91
  -8  -3   0    1.64    0.63
   8   3   0    1.23    0.45
  -8   3   0    0.83    0.44
  -8   3   0    1.36    0.64
   8   3   0    1.02    0.44
   8   3   0    2.29    0.71
   8   3   0    1.59    0.77
   8   3   0    1.25    0.51
   9  -3   0   41.32    2.55
  -9  -3   0   47.20    2.67
   9   3   0   45.74    2.13
   9   3   0   46.51    2.13
   9   3   0   44.02    2.85
   9   3   0   41.82    2.38
   9   3   0   45.30    2.15
  -9   3   0   47.53    2.10
 -10  -3   0    4.10    0.88
  10  -3   0    4.93    0.83
  10   3   0    2.84    0.92
  10   3   0    3.52    0.60
  10   3   0    3.49    0.58
 -10   3   0    4.59    0.57
  10   3   0    2.44    0.61
  10   3   0    2.83    0.63
  11  -3   0    4.77    0.67
 -11  -3   0    6.06    0.88
  11   3   0    3.45    0.67
  11   3   0    3.81    0.58
  11   3   0    3.96    0.62
  11   3   0    3.85    0.58
  11   3   0    3.06    0.86
 -12  -3   0   -0.14    0.44
  12  -3   0   -0.05    0.49
  12   3   0    0.63    0.35
  12   3   0   -0.22    0.34
   0  -4   0   68.53    3.13
   0   4   0   63.15    2.97
   0   4   0   61.11    2.89
   0   4   0   58.46    4.31
   1  -4   0    9.36    0.98
   1  -4   0    9.35    0.92
  -1  -4   0    9.67    0.78
  -1   4   0    9.93    0.82
  -1   4   0   10.07    1.49
  -1   4   0   10.90    0.79
  -1   4   0   10.67    0.85
   1   4   0   10.22    1.49
   1   4   0   10.00    0.69
   2  -4   0   18.25    1.32
  -2  -4   0   17.42    0.97
   2  -4   0   17.88    1.38
  -2   4   0   16.50    1.21
   2   4   0   14.72    0.98
   2   4   0   15.71    1.55
  -2   4   0   14.76    1.02
   2   4   0   16.32    1.91
  -2   4   0   16.72    1.16
   2   4   0   15.32    1.87
  -2   4   0   14.25    1.79
   3  -4   0   11.55    1.13
   3  -4   0    8.77    1.11
  -3   4   0   11.55    0.93
   3   4   0   13.36    1.39
  -3   4   0   11.57    0.99
  -3   4   0   13.38    1.12
   3   4   0    8.20    1.73
  -3   4   0   10.87    1.62
  -3   4   0   11.78    0.99
   3   4   0   12.15    0.85
  -3   4   0   12.48    1.07
   4  -4   0   20.81    1.73
   4  -4   0   23.43    1.77
   4   4   0   23.99    1.83
  -4   4   0   23.14    1.46
  -4   4   0   23.13    1.49
   4   4   0   21.88    2.55
  -4   4   0   23.45    1.51
  -4   4   0   22.28    2.32
  -4   4   0   21.71    1.61
   4   4   0   24.62    1.21
   5  -4   0    0.81    0.60
   5  -4   0    0.98    1.05
   5  -4   0    1.27    0.61
  -5   4   0    0.56    0.41
   5   4   0   -0.10    0.61
  -5   4   0   -0.21    0.37
  -5   4   0    0.61    0.50
  -5   4   0    0.38    0.36
  -5   4   0    0.59    0.88
  -5   4   0    0.30    0.48
   5   4   0    0.53    0.36
   5   4   0    0.72    0.37
   6  -4   0   10.46    1.53
  -6  -4   0   12.31    1.10
   6  -4   0    9.94    1.45
  -6   4   0   13.18    1.48
   6   4   0   11.41    1.44
  -6   4   0   14.96    1.53
  -6   4   0   12.96    1.23
  -6   4   0   10.85    1.09
   6   4   0   13.96    0.92
   6   4   0   12.08    0.85
   7  -4   0    1.28    0.80
  -7  -4   0    1.68    0.67
   7   4   0    1.67    0.46
  -7   4   0    1.51    0.53
   7   4   0    0.95    0.72
  -7   4   0    1.04    0.70
  -7   4   0    1.62    0.58
   7   4   0    1.19    0.55
   7   4   0    1.16    0.37
   8  -4   0   18.87    1.81
  -8  -4   0   17.82    1.50
  -8   4   0   18.25    1.40
   8   4   0   19.77    1.18
   8   4   0   17.70    1.12
  -8   4   0   19.31    1.53
  -8   4   0   17.66    1.48
   8   4   0   19.14    1.29
   8   4   0   20.30    1.80
   9  -4   0    0.25    0.52
  -9  -4   0   -0.01    0.70
   9   4   0    0.89    0.41
   9   4   0    0.24    0.33
   9   4   0   -0.21    0.46
  -9   4   0    0.33    0.44
   9   4   0    0.92    0.69
  -9   4   0    0.65    0.46
  10  -4   0   18.15    1.34
 -10   4   0   17.91    1.24
  10   4   0   19.18    1.59
 -10   4   0   16.69    1.33
  10   4   0   16.98    1.04
  10   4   0   16.56    1.06
  11  -4   0    0.86    0.35
 -11  -4   0    1.26    0.54
  11   4   0    1.12    0.46
  11   4   0    0.86    0.31
 -11   4   0    0.74    0.38
   0  -5   0    0.01    0.44
   0  -5   0   -0.25    0.64
   0   5   0    0.12    0.39
   0   5   0    0.26    0.34
   0   5   0    0.34    0.33
   0   5   0    0.14    0.31
   0   5   0   -0.12    0.61
   1  -5   0   14.97    1.49
  -1  -5   0   12.29    1.31
  -1  -5   0   16.43    1.44
   1  -5   0   15.48    1.40
   1   5   0   18.83    1.20
  -1   5   0   20.17    2.21
  -1   5   0   20.83    1.33
   1   5   0   16.80    1.20
  -1   5   0   18.60    1.20
  -1   5   0   19.32    1.24
  -1   5   0   18.64    1.11
   1   5   0   19.12    2.17
   1   5   0   18.52    1.04
   2  -5   0    2.71    0.85
   2  -5   0    2.87    0.82
  -2  -5   0    2.70    0.63
  -2   5   0    2.69    1.00
   2   5   0    1.28    0.47
  -2   5   0    3.18    0.39
  -2   5   0    3.66    0.63
  -2   5   0    3.45    0.39
   2   5   0    2.70    1.05
   2   5   0    3.64    0.51
  -2   5   0    3.68    0.68
   2   5   0    3.10    0.54
  -2   5   0    2.05    0.58
  -2   5   0    3.54    0.63
  -3  -5   0   21.56    1.55
   3  -5   0   23.12    1.86
   3  -5   0   22.61    1.85
  -3   5   0   23.65    2.46
  -3   5   0   22.55    1.48
  -3   5   0   22.99    1.23
  -3   5   0   22.45    1.64
  -3   5   0   23.43    1.18
  -3   5   0   22.95    1.42
   3   5   0   22.39    1.19
  -3   5   0   21.21    1.52
   3   5   0   22.16    1.26
   4  -5   0   13.24    1.40
  -4   5   0   14.12    1.15
  -4   5   0   12.37    1.89
   4   5   0   12.26    0.88
  -4   5   0   12.71    0.90
  -4   5   0   11.92    0.93
   4   5   0   12.54    0.92
  -4   5   0   11.89    1.05
  -4   5   0   12.55    1.17
   5  -5   0   10.89    1.56
   5  -5   0   10.83    1.44
  -5   5   0    8.98    1.00
   5   5   0    8.96    0.80
  -5   5   0    9.09    0.86
  -5   5   0    9.78    1.78
  -5   5   0   10.92    1.10
  -5   5   0    9.65    1.05
   5   5   0    9.33    0.81
   5   5   0    9.75    1.51
  -5   5   0    9.49    0.81
  -5   5   0   12.85    1.40
  -6  -5   0   -0.09    0.65
   6  -5   0    0.88    0.91
   6  -5   0    0.49    0.69
  -6   5   0    0.62    0.34
   6   5   0    0.89    0.42
  -6   5   0    0.12    0.52
   6   5   0    0.23    0.84
  -6   5   0    1.28    0.64
  -6   5   0    0.86    0.58
  -6   5   0    0.74    0.29
   6   5   0    0.50    0.37
  -6   5   0   -0.23    0.44
   7  -5   0   12.16    1.43
  -7   5   0   12.47    0.92
   7   5   0   13.35    0.93
  -7   5   0   12.43    1.27
   7   5   0   13.28    1.62
  -7   5   0   13.37    1.01
  -7   5   0   12.49    1.20
   7   5   0   11.71    0.86
   8  -5   0    1.67    0.68
  -8   5   0    1.84    0.45
  -8   5   0    2.37    0.58
  -8   5   0    1.42    0.52
  -8   5   0    2.28    0.43
   8   5   0    2.23    0.44
   8   5   0    1.74    0.81
   9  -5   0    2.03    0.61
  -9   5   0    0.96    0.32
   9   5   0    1.69    0.40
  -9   5   0    0.93    0.31
   0  -6   0   51.99    2.89
   0   6   0   46.94    3.72
   0   6   0   46.23    2.22
   0   6   0   43.45    2.02
   1  -6   0    1.16    0.74
  -1  -6   0    1.48    0.81
   1   6   0    1.51    0.36
   1   6   0    1.27    0.42
  -1   6   0    2.01    0.43
   1   6   0    1.53    0.91
  -1   6   0    1.36    0.47
  -1   6   0    2.76    1.08
  -2  -6   0    2.25    0.85
   2  -6   0    0.89    0.67
  -2   6   0    1.29    0.46
   2   6   0    1.25    0.85
  -2   6   0    1.52    0.41
   2   6   0    0.75    0.42
   2   6   0    1.20    0.31
  -2   6   0    1.50    0.83
   3  -6   0    1.28    0.64
  -3   6   0    0.43    0.40
  -3   6   0    1.15    0.38
  -3   6   0    0.55    0.82
   3   6   0    0.72    0.42
   4   6   0    9.14    0.93
  -4   6   0   14.01    1.37
  -4   6   0   11.27    0.95
  -4   6   0   11.19    1.79
  -4   6   0   10.72    0.81
  -4   6   0   10.50    1.01
   5  -6   0    0.27    0.57
  -5   6   0    0.02    0.35
  -5   6   0    0.50    0.53
  -5   6   0   -0.21    0.40
  -5   6   0    0.05    0.96
  -5   6   0    0.11    0.25
   5   6   0   -0.28    0.42
   6  -6   0    9.86    1.18
  -6   6   0    9.87    0.94
  -6   6   0    9.53    1.02
   7  -6   0    0.72    0.51
  -7   6   0    0.72    0.40
   7   6   0    0.42    0.42
   0   7   0    0.22    0.27
  -1   7   0   12.72    0.88
   1   7   0   14.09    0.83
   2  -7   0    1.49    0.61
   2   7   0    1.64    0.31
  -2   7   0    1.63    0.39
  13   0  -1   14.24    1.04
  13   0  -1   15.80    1.29
  13   0  -1   15.53    1.14
 -13   0   1   16.13    1.17
  12   0  -1    0.26    0.39
  12   0  -1    0.03    0.45
  12   0  -1   -0.12    0.45
  12   0  -1    0.12    0.44
  11   0  -1   18.69    1.65
  11   0  -1   20.26    1.55
  11   0  -1   19.63    1.29
 -11   0   1   19.85    1.53
  11   0  -1   22.33    1.66
  10   0  -1    2.16    0.87
  10   0  -1    2.96    0.77
 -10   0   1    3.01    0.80
  10   0  -1    1.80    0.64
  10   0  -1    3.61    0.68
  10   0  -1    2.24    0.76
   9   0  -1    3.25    0.71
   8   0  -1    2.06    0.55
  -8   0   1    2.70    0.75
   8   0  -1    1.59    1.20
   8   0  -1    1.49    0.72
  -8   0   1    2.36    0.71
  -8   0   1    2.91    0.73
   7   0  -1   45.79    2.68
  -7   0   1   42.81    2.29
   7   0  -1   44.30    3.41
  -7   0   1   46.15    2.87
  -7   0   1   47.44    2.47
   6   0  -1   -0.09    0.62
  -6   0   1    0.18    0.37
   6   0  -1    0.23    0.33
  -6   0   1    0.24    0.44
  -6   0   1    0.42    0.43
   5   0  -1   47.58    3.08
  -5   0   1   45.17    2.54
   5   0  -1   46.00    2.35
  -5   0   1   41.53    2.24
  -5   0   1   44.49    2.76
   5   0  -1   43.83    2.24
  -4   0   1    1.09    0.37
   4   0  -1    0.91    0.56
  -4   0   1    0.62    0.31
   4   0  -1    0.96    0.26
  -4   0   1    0.84    0.42
   4   0  -1    0.96    0.33
   3   0  -1  209.54   10.34
  -3   0   1  216.56    9.52
   3   0  -1  203.58    9.36
   3   0  -1  211.08    8.69
   3   0  -1  175.70   10.08
  -3   0   1  203.76    8.68
  -3   0   1  223.24   10.17
  -2   0   1   72.51    3.19
   2   0  -1   66.22    3.71
   2   0  -1   74.55    3.20
   2   0  -1   72.52    3.85
  -2   0   1   75.51    3.74
   2   0  -1   74.02    3.41
  -2   0   1   77.85    3.52
   1   0  -1   83.60    4.13
  -1   0   1   84.22    3.85
   1   0  -1   83.86    3.51
   1   0  -1   83.06    4.08
  -1   0   1   83.85    3.50
  -1   0   1   80.76    3.15
   1   0  -1   83.87    3.79
  -1   0   1   81.00    4.07
   0   0  -1   27.59    1.24
   0   0  -1   25.66    1.05
   0   0   1   22.79    1.32
   0   0   1   27.98    1.05
   0   0   1   27.23    1.27
   0   0   1   26.74    1.17
   0   0   1   27.27    1.16
   0   0   1   21.74    1.22
   0   0   1   27.60    1.35
   0   0  -1   26.08    1.16
   0   0  -1   26.95    1.35
   0   0  -1   24.67    1.31
   0   0   1   26.94    1.30
  -1   0  -1   23.52    1.15
   1   0   1   26.24    1.21
   1   0   1   25.31    1.16
  -1   0  -1   25.42    1.29
  -1   0  -1   25.61    1.24
  -1   0  -1   24.37    1.35
   2   0   1   28.52    1.38
  -2   0  -1   28.43    1.50
  -2   0  -1   29.10    1.37
  -2   0  -1   26.38    1.32
   2   0   1   28.18    1.62
  -2   0  -1   29.28    1.47
   2   0   1   24.91    1.71
  -2   0  -1   30.50    1.64
  -3   0  -1   30.73    1.56
  -3   0  -1   32.52    1.69
   3   0   1   26.34    1.59
  -3   0  -1   34.59    1.90
   3   0   1   28.62    2.03
  -3   0  -1   31.36    1.50
   3   0   1   32.38    1.53
  -3   0  -1   29.99    1.68
  -4   0  -1   16.61    1.14
   4   0   1   16.36    1.49
  -4   0  -1   15.37    1.07
  -4   0  -1   15.89    1.26
   4   0   1   15.92    1.03
   5   0   1   42.60    2.95
  -5   0  -1   42.33    2.42
  -5   0  -1   42.27    2.68
  -5   0  -1   41.82    2.43
   5   0   1   43.01    2.24
  -6   0  -1    3.59    0.60
   6   0   1    3.64    0.71
  -6   0  -1    3.34    0.66
  -6   0  -1    3.86    0.76
   6   0   1    3.31    1.14
  -7   0  -1   44.95    2.24
   7   0   1   48.15    3.49
  -7   0  -1   44.00    2.39
   7   0   1   40.31    2.53
   7   0   1   44.08    2.44
  -7   0  -1   42.81    2.81
   8   0   1   -0.16    0.54
  -8   0  -1    0.81    0.70
   8   0   1    0.99    0.64
  -8   0  -1   -0.09    0.57
   8   0   1    0.19    0.49
   8   0   1    1.25    1.08
  -8   0  -1    0.40    0.53
   9   0   1   44.05    2.02
   9   0   1   44.89    2.60
   9   0   1   43.60    2.32
   9   0   1   43.03    2.66
  -9   0  -1   38.90    2.42
  -9   0  -1   45.53    2.70
  10   0   1    8.20    1.28
  10   0   1    6.90    0.97
  10   0   1    7.69    1.00
  11   0   1  112.93    4.97
 -11   0  -1  112.86    5.18
  11   0   1  106.22    4.90
  11   0   1  106.59    4.58
  11   0   1  108.22    5.23
  11   0   1  110.78    4.55
  11   0   1  112.53    5.26
  12   0   1    2.20    0.55
  12   0   1    2.07    0.46
  12   0   1    2.02    0.48
  12   0   1    1.76    0.75
 -12   0  -1    2.78    0.63
  12   0   1    1.64    0.53
  13   0   1   15.14    0.91
 -13   0  -1   13.48    1.11
  13   0   1   14.02    0.94
  13   0   1   15.54    1.20
  13  -1  -1    3.11    0.64
  13  -1  -1    4.91    0.67
  13  -1  -1    3.78    0.59
 -13   1   1    3.47    0.50
  13   1  -1    5.29    0.53
  13   1  -1    3.92    0.50
  13   1  -1    4.40    0.70
 -12  -1   1    5.49    0.80
  12  -1  -1    5.54    0.85
 -12   1   1    3.89    0.65
  12   1  -1    5.55    0.72
  12   1  -1    5.85    0.87
  12   1  -1    7.41    0.81
  12   1  -1    5.27    0.71
  11  -1  -1    7.39    1.08
  11  -1  -1    4.43    0.59
 -11  -1   1    5.43    0.85
  11   1  -1    3.84    0.66
  11   1  -1    5.17    0.74
  11   1  -1    3.97    0.74
 -11   1   1    2.46    0.66
  11   1  -1    4.68    1.06
  11   1  -1    5.53    0.85
  11   1  -1    4.14    0.83
  11   1  -1    4.39    0.70
  10  -1  -1   46.72    2.94
 -10  -1   1   47.64    2.84
 -10  -1   1   41.98    2.63
  10  -1  -1   46.59    2.42
  10   1  -1   48.54    2.61
 -10   1   1   45.97    2.69
  10   1  -1   45.03    2.84
  10   1  -1   46.80    2.19
  10   1  -1   49.20    2.50
  10   1  -1   50.24    2.60
  10   1  -1   48.71    2.42
  10   1  -1   47.17    2.83
   9  -1  -1    3.63    0.81
   9  -1  -1    4.38    0.68
  -9  -1   1    3.78    0.87
  -9  -1   1    3.76    0.78
   9   1  -1    3.60    0.76
  -9   1   1    3.46    0.79
   9   1  -1    3.12    0.75
   9   1  -1    3.60    0.70
   9   1  -1    3.92    0.82
   9   1  -1    3.10    0.86
   9   1  -1    3.28    0.79
   9   1  -1    4.06    0.68
  -8  -1   1   61.64    3.03
   8  -1  -1   62.38    4.43
   8   1  -1   52.72    3.18
   8   1  -1   50.15    4.10
   8   1  -1   54.89    3.00
   8   1  -1   53.27    2.57
   8   1  -1   56.42    3.01
   8   1  -1   54.76    2.33
   7  -1  -1    9.09    0.87
  -7  -1   1    8.01    0.90
   7  -1  -1    8.56    1.46
   7   1  -1    9.64    1.01
   7   1  -1    7.59    1.00
   7   1  -1    7.18    1.57
  -7   1   1    9.62    1.12
  -7   1   1    8.23    0.95
  -6  -1   1   32.76    1.75
   6  -1  -1   32.19    2.64
   6  -1  -1   24.11    2.13
  -6  -1   1   31.09    2.33
   6  -1  -1   32.92    1.88
  -6   1   1   32.21    1.78
  -6   1   1   32.41    2.06
   6   1  -1   27.80    2.55
   6   1  -1   33.29    1.90
   5  -1  -1   50.19    3.07
   5  -1  -1   47.51    3.32
   5  -1  -1   47.06    2.69
  -5  -1   1   45.58    3.01
  -5   1   1   52.48    2.40
  -5   1   1   51.55    2.69
   5   1  -1   54.95    2.59
   5   1  -1   48.81    3.34
  -5   1   1   52.34    3.09
  -5   1   1   55.47    2.85
  -4  -1   1   46.81    2.46
   4  -1  -1   44.90    2.13
   4  -1  -1   42.86    2.14
  -4  -1   1   41.33    2.26
   4  -1  -1   42.92    2.16
   4  -1  -1   47.22    2.46
  -4  -1   1   42.18    2.18
   4   1  -1   34.88    2.58
  -4   1   1   35.02    2.06
   4   1  -1   34.97    1.96
  -4   1   1   32.61    1.91
  -4   1   1   35.50    2.37
  -4   1   1   36.57    1.86
  -4   1   1   39.49    2.21
   3  -1  -1   33.19    1.75
  -3  -1   1   31.07    1.84
   3  -1  -1   32.82    1.70
   3  -1  -1   31.69    1.67
   3  -1  -1   36.09    1.96
  -3  -1   1   36.03    1.95
  -3   1   1   31.35    1.58
   3   1  -1   29.69    1.61
   3   1  -1   32.21    2.12
  -3   1   1   34.26    1.80
   3   1  -1   32.37    1.61
  -3   1   1   32.98    1.96
  -3   1   1   32.26    1.53
  -3   1   1   31.51    1.69
   2  -1  -1   11.71    0.74
  -2  -1   1   11.64    0.73
   2  -1  -1   11.09    0.87
   2  -1  -1   11.59    0.85
   2  -1  -1   11.27    0.75
   2  -1  -1   11.61    0.72
  -2  -1   1   12.04    0.80
   2   1  -1   11.61    0.69
  -2   1   1   11.85    0.73
  -2   1   1   11.95    0.67
  -2   1   1   12.44    0.75
   2   1  -1   11.10    0.80
  -2   1   1   11.97    0.71
  -2   1   1   12.49    0.86
   2   1  -1   12.25    0.72
  -2   1   1   11.83    0.69
   2   1  -1   11.55    1.02
   1  -1  -1   89.42    4.38
  -1  -1   1   91.24    4.25
  -1   1   1   89.49    3.46
  -1   1   1   85.27    3.42
   1   1  -1   86.99    4.50
  -1   1   1   91.22    4.39
   1   1  -1   88.33    3.74
   1   1  -1   83.17    3.74
  -1   1   1   83.18    3.71
  -1   1   1   85.14    3.71
   0  -1  -1  304.87   14.66
   0  -1   1  297.38   13.66
   0   1   1  305.85   11.41
   0   1   1  307.07   14.67
   0   1  -1  307.20   12.57
   0   1   1  306.38   14.70
   0   1  -1  304.11   12.55
   0   1   1  301.44   12.43
   0   1  -1  294.62   14.75
   0   1  -1  307.22   11.32
   0   1   1  310.95   12.43
   1  -1   1   15.27    0.83
   1  -1   1   16.18    0.93
   1  -1   1   15.49    0.83
   1  -1   1   15.75    0.84
  -1   1  -1   13.10    0.77
  -1   1  -1   13.12    0.81
   1   1   1   12.84    0.96
  -1   1  -1   13.64    0.81
  -1   1  -1   13.26    0.81
   1   1   1   12.79    0.74
  -1   1  -1   14.22    0.82
   2  -1   1  128.57    5.73
   2  -1   1  120.72    6.09
  -2  -1  -1  123.65    6.18
   2  -1   1  121.82    5.39
   2  -1   1  120.56    6.16
  -2   1  -1  120.78    6.09
  -2   1  -1  131.80    5.77
   2   1   1  125.45    5.13
   2   1   1  114.38    5.12
  -2   1  -1  121.28    5.31
   2   1   1  123.23    6.25
  -2   1  -1  123.31    4.98
   3  -1   1    1.41    0.34
   3  -1   1    1.55    0.48
   3  -1   1    0.96    0.39
  -3  -1  -1    0.90    0.16
  -3  -1  -1    1.09    0.35
  -3   1  -1    0.05    0.22
  -3   1  -1    0.20    0.23
  -3   1  -1    0.24    0.28
   3   1   1    1.15    0.51
   3   1   1    0.51    0.22
  -3   1  -1    0.43    0.33
   4  -1   1  248.87   10.99
   4  -1   1  237.50   10.19
   4  -1   1  207.92   10.28
  -4  -1  -1  228.26   10.07
  -4  -1  -1  235.10   11.87
   4  -1   1  239.25   11.80
   4   1   1  246.82   10.02
  -4   1  -1  250.22   11.85
   4   1   1  248.82   12.09
  -4   1  -1  251.23   11.07
  -4   1  -1  223.95   10.18
   5  -1   1   11.80    1.15
  -5  -1  -1   10.80    1.16
   5  -1   1   11.17    0.99
   5  -1   1   10.65    1.40
   5  -1   1   11.47    0.91
  -5  -1  -1   10.29    0.87
   5   1   1   12.79    1.46
   5   1   1   12.56    0.89
  -5   1  -1   11.68    1.13
  -5   1  -1   11.23    1.02
   6  -1   1   77.11    5.08
  -6  -1  -1   81.84    4.36
   6  -1   1   81.39    4.09
  -6   1  -1   77.26    4.28
   6   1   1   92.53    5.20
   6   1   1   84.00    3.93
   6   1   1   77.38    3.84
   7  -1   1   11.78    1.71
   7  -1   1   13.36    1.32
  -7  -1  -1   12.64    1.24
   7   1   1   13.58    1.86
   7   1   1   13.59    1.27
  -7   1  -1   12.37    1.28
   7   1   1   13.50    1.18
   8  -1   1   43.67    2.55
  -8  -1  -1   42.16    2.43
   8  -1   1   42.59    3.70
   8   1   1   46.38    2.61
   8   1   1   38.99    3.48
   8   1   1   43.33    1.95
   8   1   1   43.32    2.06
   8   1   1   42.69    2.13
   9  -1   1    9.61    1.28
   9  -1   1    6.84    0.92
  -9  -1  -1    9.11    1.16
  -9  -1  -1    7.94    1.01
   9  -1   1    9.96    1.30
   9   1   1    8.64    1.10
   9   1   1    8.23    0.91
   9   1   1    7.31    1.15
   9   1   1   10.71    1.19
   9   1   1    7.09    1.09
   9   1   1    9.65    1.01
   9   1   1    9.29    0.98
   9   1   1    8.79    0.94
  10  -1   1   29.66    2.21
 -10  -1  -1   29.49    1.94
  10  -1   1   27.67    1.60
  10  -1   1   27.76    1.63
 -10  -1  -1   31.14    2.11
  10   1   1   32.65    1.85
  10   1   1   29.89    1.64
 -10   1  -1   31.54    1.92
  10   1   1   29.64    1.74
  10   1   1   30.11    2.15
  10   1   1   31.70    1.90
  10   1   1   30.39    2.19
  10   1   1   30.56    1.76
  10   1   1   28.58    1.73
  11  -1   1    0.94    0.60
 -11   1  -1    0.66    0.58
  11   1   1    1.24    0.54
  11   1   1    0.84    0.49
  11   1   1    2.09    0.51
  11   1   1    0.86    0.62
  11   1   1    0.45    0.72
  11   1   1    1.96    0.64
 -12  -1  -1    9.17    1.03
  12  -1   1    6.57    0.92
  12  -1   1    8.06    1.06
  12  -1   1   10.54    1.02
  12   1   1    9.67    1.25
  12   1   1   10.23    1.07
  12   1   1   11.09    0.86
  12   1   1    9.54    0.82
 -12   1  -1   11.04    1.06
  12   1   1   10.06    0.79
  13  -1   1    0.35    0.41
  13  -1   1    0.65    0.40
 -13   1  -1    0.45    0.31
  13   1   1    0.63    0.30
  13   1   1    1.04    0.35
 -12  -2   1   11.04    1.13
  12  -2  -1   12.46    1.26
  12   2  -1   11.14    1.05
  12   2  -1   11.43    1.14
  12   2  -1   12.55    0.95
 -12   2   1   12.19    0.86
  11  -2  -1   24.59    1.54
 -11  -2   1   26.70    1.80
 -11  -2   1   24.07    1.98
  11   2  -1   25.01    1.56
  11   2  -1   24.87    1.54
  11   2  -1   24.98    1.42
  11   2  -1   24.62    1.50
  11   2  -1   22.64    1.36
  11   2  -1   23.81    1.43
 -11   2   1   25.30    1.48
  11   2  -1   26.32    1.72
  11   2  -1   25.26    1.96
  10  -2  -1    3.17    0.75
 -10  -2   1    3.83    0.86
 -10  -2   1    3.05    0.79
  10   2  -1    2.00    0.55
  10   2  -1    3.22    0.90
 -10   2   1    2.53    0.59
  10   2  -1    2.83    0.62
  10   2  -1    2.69    0.63
  10   2  -1    2.99    0.68
  10   2  -1    2.46    0.55
  10   2  -1    3.40    0.73
  -9  -2   1   16.45    1.47
   9  -2  -1   16.38    1.49
   9   2  -1   17.25    1.32
  -9   2   1   16.10    1.31
   9   2  -1   14.00    1.41
   9   2  -1   15.62    1.21
   9   2  -1   15.38    1.17
   9   2  -1   17.79    1.60
   9   2  -1   13.86    1.11
   9   2  -1   15.94    1.20
  -8  -2   1    6.11    0.88
   8   2  -1    5.41    0.73
   8   2  -1    6.08    0.84
   8   2  -1    6.11    0.79
   8   2  -1    6.72    0.79
   8   2  -1    5.16    0.97
   8   2  -1    6.40    0.81
   7  -2  -1   26.60    1.89
   7  -2  -1   28.33    2.75
  -7  -2   1   27.92    1.70
   7   2  -1   26.13    1.74
   7   2  -1   26.31    1.41
   7   2  -1   18.79    2.49
   7   2  -1   28.48    1.88
   7   2  -1   27.76    1.49
  -6  -2   1    2.02    0.51
   6  -2  -1    1.21    0.71
   6  -2  -1    2.07    0.56
   6   2  -1    0.73    0.49
   6   2  -1    0.04    0.84
  -6   2   1    0.56    0.41
   6   2  -1    1.22    0.44
  -5  -2   1  178.29    9.31
   5  -2  -1  198.86    9.42
   5  -2  -1  185.86    8.31
   5  -2  -1  186.61    8.22
   5  -2  -1  186.19    8.71
  -5   2   1  178.08    7.33
  -5   2   1  184.85    8.15
   5   2  -1  152.42    9.65
  -5   2   1  175.07    9.34
   5   2  -1  178.17    7.84
  -5   2   1  183.75    7.62
  -4  -2   1   26.04    1.71
   4  -2  -1   24.83    1.57
   4  -2  -1   23.23    1.52
   4  -2  -1   26.03    1.78
   4  -2  -1   23.51    1.54
  -4   2   1   24.25    1.44
  -4   2   1   23.88    1.73
  -4   2   1   25.56    1.55
   4   2  -1   22.77    2.02
  -4   2   1   24.97    1.40
   4   2  -1   24.16    1.37
   3  -2  -1   79.94    3.87
   3  -2  -1   83.85    3.84
  -3  -2   1   81.13    4.29
   3  -2  -1   83.70    4.38
   3  -2  -1   83.77    4.06
   3   2  -1   77.24    4.68
  -3   2   1   80.44    3.79
  -3   2   1   83.24    3.56
  -3   2   1   81.21    3.47
   3   2  -1   86.96    3.71
  -3   2   1   82.43    4.42
  -2  -2   1   79.02    4.18
   2  -2  -1   77.92    4.23
   2  -2  -1   81.17    3.72
   2  -2  -1   80.86    3.96
   2   2  -1   84.80    4.66
  -2   2   1   82.71    3.45
   2   2  -1   87.96    3.71
  -2   2   1   87.98    4.40
  -2   2   1   82.59    3.71
  -2   2   1   84.18    3.44
   2   2  -1   82.13    3.66
   1  -2  -1  146.27    7.36
   1  -2  -1  144.15    6.23
   1   2  -1  145.41    7.66
  -1   2   1  146.74    6.25
   1   2  -1  149.78    6.31
   1   2  -1  141.51    6.30
  -1   2   1  158.28    5.81
  -1   2   1  152.85    7.43
  -1   2   1  151.47    5.83
   1   2  -1  141.88    5.61
   0  -2  -1   21.02    1.34
   0  -2   1   21.58    1.03
   0   2   1   21.60    1.09
   0   2   1   21.75    1.51
   0   2  -1   21.09    1.15
   0   2  -1   21.20    1.14
   0   2   1   19.57    0.99
   0   2  -1   19.80    1.54
   0   2  -1   20.22    0.98
   1  -2   1  116.51    5.68
   1  -2   1  118.78    5.37
   1  -2   1  110.76    5.55
   1  -2   1  118.17    5.02
  -1  -2  -1  101.84    5.84
   1   2   1  117.69    6.01
  -1   2  -1  114.18    4.48
  -1   2  -1  114.01    4.99
  -1   2  -1  113.59    5.59
   1   2   1  115.50    4.55
   2  -2   1   68.80    3.60
   2  -2   1   62.49    3.43
  -2  -2  -1   66.09    3.60
   2  -2   1   65.00    3.32
   2  -2   1   66.18    3.15
  -2   2  -1   67.15    3.45
  -2   2  -1   66.90    3.13
   2   2   1   67.98    3.81
  -2   2  -1   68.21    2.92
  -2   2  -1   67.01    2.82
   3  -2   1   24.14    1.51
  -3  -2  -1   25.46    1.70
   3  -2   1   22.90    1.51
   3  -2   1   24.68    1.69
   3  -2   1   26.47    1.53
   3   2   1   27.09    1.93
  -3   2  -1   24.86    1.38
  -3   2  -1   25.12    1.35
  -3   2  -1   23.18    1.46
   3   2   1   23.33    1.18
   3   2   1   24.25    1.18
  -3   2  -1   25.31    1.59
   4  -2   1   13.42    1.29
   4  -2   1   14.25    1.12
  -4  -2  -1   12.59    0.72
   4  -2   1   14.16    1.18
   4  -2   1   14.52    1.17
  -4  -2  -1   13.87    1.27
  -4   2  -1   16.12    1.26
  -4   2  -1   17.25    1.14
   4   2   1   15.08    0.88
  -4   2  -1   17.08    1.18
  -4   2  -1   14.05    1.02
   4   2   1   14.85    1.48
   5  -2   1   39.25    2.36
  -5  -2  -1   35.77    2.64
   5  -2   1   37.33    2.36
   5  -2   1   36.89    2.57
   5   2   1   45.26    3.01
  -5   2  -1   40.48    2.29
  -5   2  -1   43.61    2.54
   5   2   1   40.96    2.03
   6  -2   1    1.21    0.66
   6  -2   1    1.96    0.56
   6   2   1    1.61    0.64
   6   2   1    0.67    0.86
  -6   2  -1    1.42    0.57
   6   2   1    1.19    0.42
   7  -2   1   22.10    2.57
   7   2   1   23.84    1.38
  -7   2  -1   28.40    1.94
   7   2   1   25.92    1.44
   7   2   1   28.36    2.67
   7   2   1   24.75    1.83
   7   2   1   27.61    1.53
   7   2   1   27.11    1.73
  -8  -2  -1    9.96    1.02
   8   2   1   10.26    0.85
   8   2   1    7.72    0.84
   8   2   1    9.30    1.23
   8   2   1    8.78    0.94
   8   2   1    9.24    1.02
   8   2   1    8.79    0.90
   9  -2   1   63.86    3.15
  -9  -2  -1   67.52    3.52
   9   2   1   64.96    2.88
   9   2   1   65.25    2.84
   9   2   1   63.92    3.26
   9   2   1   66.50    2.72
   9   2   1   63.51    2.76
   9   2   1   68.14    3.66
  -9   2  -1   62.28    3.04
   9   2   1   62.74    2.95
 -10  -2  -1    9.16    1.22
 -10  -2  -1    9.36    1.24
  10  -2   1    9.15    1.10
  10   2   1   10.69    0.99
  10   2   1   11.11    0.99
  10   2   1   10.48    0.99
  10   2   1   10.05    0.89
 -10   2  -1   10.99    1.10
  10   2   1   12.18    1.18
  10   2   1   12.67    1.42
  10   2   1   11.61    0.92
  11  -2   1    5.85    0.98
  11  -2   1    5.65    0.64
 -11   2  -1    4.68    0.71
  11   2   1    6.28    0.84
  11   2   1    5.62    1.05
  11   2   1    5.60    0.72
  11   2   1    6.56    0.86
  11   2   1    5.90    0.77
 -12  -2  -1    5.94    0.79
  12  -2   1    5.85    0.83
 -12   2  -1    3.78    0.53
  12   2   1    4.89    0.67
  12   2   1    5.21    0.69
  12   2   1    5.47    0.70
  12   2   1    5.87    0.76
  12   2   1    5.51    0.73
 -12  -3   1    5.69    0.77
  12   3  -1    5.68    0.67
  12   3  -1    4.72    0.62
  12   3  -1    5.51    0.64
 -11  -3   1    6.92    0.98
  11  -3  -1    7.37    0.87
  11   3  -1    6.21    0.75
  11   3  -1    6.95    0.78
  11   3  -1    4.36    0.96
  11   3  -1    7.01    0.84
  11   3  -1    8.13    0.82
 -10  -3   1   10.89    1.43
 -10  -3   1    9.49    1.29
  10  -3  -1    9.38    1.15
  10   3  -1   10.26    0.95
  10   3  -1    8.04    0.98
  10   3  -1    7.27    1.19
 -10   3   1    9.42    0.70
  10   3  -1    9.61    0.93
  10   3  -1    9.70    0.90
  -9  -3   1   13.40    1.36
   9   3  -1   14.35    1.06
   9   3  -1   15.50    1.34
   9   3  -1   15.15    1.09
   9   3  -1   13.16    1.53
  -9   3   1   14.90    0.96
   9   3  -1   14.96    1.16
  -8  -3   1   57.87    3.13
   8  -3  -1   56.68    3.46
   8   3  -1   54.24    2.46
   8   3  -1   59.78    3.34
   8   3  -1   57.24    3.03
   8   3  -1   58.70    2.42
  -8   3   1   56.86    3.03
   8   3  -1   57.90    2.55
   8   3  -1   56.19    2.54
   8   3  -1   58.36    2.45
  -8   3   1   58.25    2.50
   7  -3  -1   -0.32    0.74
  -7  -3   1    0.36    0.46
   7   3  -1    0.24    0.61
   7   3  -1    0.21    0.35
   7   3  -1    0.11    0.46
   7   3  -1    0.44    0.54
   7   3  -1    0.04    0.33
   7   3  -1   -0.69    0.46
  -7   3   1   -0.12    0.64
   6  -3  -1    6.44    1.11
  -6  -3   1    5.22    0.79
   6  -3  -1    6.51    1.14
   6  -3  -1    5.39    1.00
   6   3  -1    5.53    0.67
   6   3  -1    5.59    1.01
   6   3  -1    7.58    0.85
   6   3  -1    1.86    1.21
   6   3  -1    5.91    0.69
   6   3  -1    6.03    0.69
   6   3  -1    4.66    0.90
   5  -3  -1   10.62    1.15
   5  -3  -1   10.86    1.32
  -5  -3   1    8.76    0.85
   5  -3  -1    9.74    1.09
  -5   3   1    9.14    1.06
   5   3  -1    8.97    1.08
  -5   3   1   10.46    1.08
   5   3  -1    6.11    1.57
   5   3  -1    8.90    0.90
   4  -3  -1   87.97    4.24
   4  -3  -1   88.11    4.85
   4  -3  -1   86.84    4.25
  -4   3   1   82.03    3.85
  -4   3   1   91.26    3.94
  -4   3   1   89.39    4.22
   4   3  -1   82.52    4.07
   4   3  -1   78.62    3.97
   4   3  -1   81.39    5.31
   3  -3  -1    9.46    1.08
   3  -3  -1    9.62    0.87
   3  -3  -1    9.76    0.94
   3   3  -1   10.40    1.40
   3   3  -1   10.68    0.82
  -3   3   1   10.87    0.89
  -3   3   1    9.87    0.90
  -3   3   1    9.66    0.82
   2  -3  -1   52.98    2.51
   2  -3  -1   50.45    2.52
   2   3  -1   47.32    3.34
  -2   3   1   50.29    2.41
  -2   3   1   48.54    2.30
  -2   3   1   51.68    2.50
   2   3  -1   49.07    2.41
   1  -3  -1   20.29    1.13
  -1  -3   1   20.00    1.05
  -1   3   1   20.07    1.06
  -1   3   1   19.90    1.22
   1   3  -1   20.03    1.81
   1   3  -1   20.72    1.19
  -1   3   1   20.98    1.16
   0  -3   1   14.18    0.91
   0  -3   1   13.84    0.89
   0   3  -1   15.20    0.99
   0   3   1   14.63    0.83
   0   3   1   15.43    1.00
   1  -3   1   86.56    4.14
   1  -3   1   87.27    4.15
   1  -3   1   88.82    4.68
  -1   3  -1   92.11    4.13
   1   3   1   93.36    5.13
  -1   3  -1   90.55    3.89
   2  -3   1   80.09    4.41
   2  -3   1   76.46    3.87
   2  -3   1   74.92    3.82
  -2   3  -1   83.57    3.83
  -2   3  -1   80.97    3.47
  -2   3  -1   82.41    3.57
   2   3   1   81.77    4.77
   3  -3   1   63.07    3.38
   3  -3   1   68.48    3.39
   3  -3   1   62.95    3.82
  -3   3  -1   65.03    3.02
  -3   3  -1   65.43    3.10
  -3   3  -1   69.93    3.35
   3   3   1   64.01    4.13
   4  -3   1   41.48    2.74
   4  -3   1   43.47    2.46
   4  -3   1   42.55    2.45
   4   3   1   39.33    3.02
  -4   3  -1   37.90    2.13
  -4   3  -1   38.15    2.34
   4   3   1   36.99    2.27
  -4   3  -1   40.24    2.24
   5  -3   1   20.25    1.62
   5  -3   1   17.82    1.82
   5  -3   1   18.94    1.62
   5   3   1   21.06    2.20
   5   3   1   18.56    1.53
  -5   3  -1   23.20    1.68
   5   3   1   19.37    1.02
  -5   3  -1   18.68    1.58
   6   3   1   70.21    2.84
   6   3   1   71.15    2.84
   6   3   1   75.14    5.06
   6   3   1   74.35    3.79
   7  -3   1    1.66    0.81
   7   3   1    0.93    0.68
   7   3   1    0.02    0.45
  -7   3  -1    0.60    0.69
   7   3   1    1.06    0.40
   7   3   1    0.35    0.34
  -7   3  -1    0.97    0.42
   8  -3   1   12.06    1.62
  -8  -3  -1   11.58    1.28
   8   3   1   13.67    0.97
   8   3   1   15.80    1.58
   8   3   1   11.17    1.25
  -8   3  -1   15.90    1.42
  -8   3  -1   12.29    1.04
   8   3   1   14.50    1.15
   8   3   1   14.67    1.01
  -9  -3  -1    2.65    0.74
   9  -3   1    1.74    0.70
   9   3   1    3.26    0.66
   9   3   1    2.52    0.81
   9   3   1    2.09    0.52
   9   3   1    2.85    0.64
  -9   3  -1    2.33    0.52
   9   3   1    2.76    0.56
 -10  -3  -1    8.34    1.24
  10  -3   1    9.11    1.03
  10   3   1    5.61    1.03
  10   3   1    6.64    0.84
  10   3   1    9.14    0.84
  10   3   1    9.94    0.81
 -10   3  -1    9.16    0.77
 -11  -3  -1    2.63    0.81
  11  -3   1    3.55    0.53
  11   3   1    3.85    0.60
  11   3   1    3.48    0.56
  11   3   1    2.64    0.57
  11   3   1    3.32    0.65
  11   3   1    3.54    0.84
 -12  -3  -1   10.92    1.00
  12  -3   1   11.16    1.11
  12   3   1   11.33    0.85
  11  -4  -1    9.04    0.80
 -11  -4   1    8.50    0.95
  11   4  -1    8.63    0.69
  11   4  -1    8.03    0.84
 -11   4   1    8.24    0.84
 -11   4   1    8.17    0.81
  11   4  -1    6.69    0.72
  10  -4  -1    2.38    0.63
 -10   4   1    2.13    0.54
  10   4  -1    2.34    0.47
  10   4  -1    1.96    0.78
 -10   4   1    1.66    0.52
  10   4  -1    2.60    0.46
  -9  -4   1    9.43    1.15
  -9   4   1    7.81    0.93
  -9   4   1   10.63    1.09
   9   4  -1    9.37    1.28
   9   4  -1   10.37    0.96
  -9   4   1    8.86    0.96
   9   4  -1    9.53    0.86
   9   4  -1    9.12    0.83
  -8  -4   1    3.08    0.84
   8  -4  -1    4.62    1.05
   8   4  -1    4.17    0.59
   8   4  -1    5.16    0.69
  -8   4   1    3.86    0.71
   8   4  -1    5.19    0.80
   8   4  -1    3.50    0.86
  -8   4   1    4.33    0.75
  -8   4   1    4.71    0.86
  -7  -4   1   22.16    1.54
   7  -4  -1   19.12    1.91
  -7   4   1   21.27    1.45
  -7   4   1   20.60    1.84
  -7   4   1   21.53    1.57
  -7   4   1   20.32    1.78
   7   4  -1   21.84    1.83
   7   4  -1   21.32    1.24
   7   4  -1   21.98    1.43
   7   4  -1   20.69    1.26
   6  -4  -1   21.06    1.88
  -6  -4   1   20.47    1.48
   6  -4  -1   21.33    2.00
   6  -4  -1   15.22    1.81
   6   4  -1   21.27    1.76
   6   4  -1   20.25    1.19
   6   4  -1   20.90    1.22
  -6   4   1   20.74    1.76
  -6   4   1   22.39    1.54
  -6   4   1   21.28    1.41
  -6   4   1   23.48    2.56
  -6   4   1   20.64    1.57
  -6   4   1   18.96    1.53
  -6   4   1   19.37    1.84
   5  -4  -1   39.85    2.98
   5  -4  -1   43.93    2.72
   5  -4  -1   41.84    2.65
  -5  -4   1   44.70    2.31
  -5   4   1   40.66    2.07
  -5   4   1   41.26    2.23
   5   4  -1   42.74    2.63
   5   4  -1   42.51    1.91
  -5   4   1   41.59    2.22
   5   4  -1   37.64    1.83
  -5   4   1   42.52    2.19
  -5   4   1   40.88    3.48
  -5   4   1   39.31    2.48
   4  -4  -1   23.94    1.71
   4  -4  -1   23.38    1.72
  -4   4   1   20.31    1.36
  -4   4   1   22.44    2.37
  -4   4   1   23.12    1.40
   4   4  -1   18.70    2.42
  -4   4   1   21.47    1.53
   4   4  -1   21.20    1.14
   4   4  -1   20.67    1.20
   4   4  -1   19.90    1.70
  -4   4   1   20.91    1.37
  -3  -4   1   41.25    2.03
   3  -4  -1   44.72    2.42
   3  -4  -1   45.12    2.40
   3   4  -1   39.00    3.16
  -3   4   1   39.91    1.97
   3   4  -1   38.41    1.82
   3   4  -1   33.65    3.18
  -3   4   1   40.14    1.97
  -3   4   1   38.05    1.90
   3   4  -1   38.35    2.43
  -3   4   1   39.16    2.15
   3   4  -1   35.72    1.91
  -3   4   1   38.82    2.28
  -3   4   1   40.21    3.22
   2  -4  -1    8.52    0.87
  -2  -4   1    9.91    0.77
   2  -4  -1    7.92    0.96
   2   4  -1    9.91    1.52
  -2   4   1    8.69    0.73
  -2   4   1    9.78    1.48
  -2   4   1    9.26    0.79
   2   4  -1    8.74    1.21
   2   4  -1    7.84    0.79
   2   4  -1    8.98    1.45
  -2   4   1    8.60    0.83
   2   4  -1    8.43    0.69
  -1  -4   1   33.89    1.79
  -1  -4   1   31.89    1.76
   1  -4  -1   36.15    1.86
   1  -4  -1   31.94    1.86
  -1   4   1   30.91    2.72
  -1   4   1   31.28    1.71
  -1   4   1   31.42    1.49
  -1   4   1   32.18    1.66
   1   4  -1   29.46    1.69
   1   4  -1   30.52    1.58
   1   4  -1   30.05    2.66
   0  -4   1   27.31    1.66
   0  -4  -1   25.49    1.48
   0  -4   1   28.59    1.66
   0   4   1   26.60    1.38
   0   4  -1   26.10    1.41
   0   4  -1   27.20    2.42
   0   4   1   27.02    1.40
   0   4  -1   25.52    1.54
   0   4  -1   26.77    1.56
   0   4   1   26.57    2.43
   1  -4   1   38.62    2.21
   1  -4   1   40.62    2.22
  -1   4  -1   36.35    2.07
  -1   4  -1   34.94    1.76
   1   4   1   36.30    2.99
  -1   4  -1   37.96    2.01
  -1   4  -1   36.69    3.01
   2  -4   1    1.25    0.52
   2  -4   1    1.26    0.82
   2  -4   1    1.20    0.63
   2   4   1    1.87    0.81
  -2   4  -1    1.36    0.50
   2   4   1    1.42    0.38
   2   4   1    1.30    0.94
  -2   4  -1    1.91    0.82
  -2   4  -1    1.30    0.44
   2   4   1    2.17    0.93
  -2   4  -1    1.85    0.50
   3  -4   1   31.52    2.09
   3  -4   1   28.90    2.04
  -3   4  -1   30.48    1.76
   3   4   1   27.56    1.37
   3   4   1   32.77    2.82
  -3   4  -1   31.57    1.68
  -3   4  -1   32.45    1.93
  -3   4  -1   32.14    2.77
  -3   4  -1   34.37    2.05
  -3   4  -1   29.11    1.74
   3   4   1   31.62    2.15
   4  -4   1   10.58    1.22
   4  -4   1    8.14    1.15
   4   4   1    8.64    0.69
  -4   4  -1    8.94    0.95
  -4   4  -1    7.91    1.14
   4   4   1    7.92    1.20
  -4   4  -1   10.10    1.85
  -4   4  -1    7.56    0.93
   4   4   1    5.91    1.51
  -4   4  -1    8.19    1.00
   5  -4   1   19.47    1.69
   5  -4   1   17.52    1.99
   5  -4   1   13.42    1.62
   5   4   1   18.97    1.04
  -5   4  -1   19.28    2.23
  -5   4  -1   18.28    1.68
  -5   4  -1   18.59    1.45
   5   4   1   19.88    1.78
  -5   4  -1   18.11    1.47
  -5   4  -1   17.90    1.36
  -5   4  -1   17.37    1.42
   6  -4   1    7.31    1.23
   6   4   1    5.97    0.95
   6   4   1    5.96    0.67
   6   4   1    5.57    0.65
  -6   4  -1    7.81    0.98
  -6   4  -1    6.54    1.07
   6   4   1    6.23    1.20
  -6   4  -1    5.73    0.90
   7  -4   1   18.94    1.78
  -7  -4  -1   18.76    1.43
   7   4   1   19.04    1.83
   7   4   1   19.68    1.13
  -7   4  -1   19.00    1.58
   7   4   1   17.61    1.26
  -7   4  -1   19.91    1.48
  -7   4  -1   16.35    1.61
   7   4   1   18.37    1.10
  -8  -4  -1    6.24    0.96
   8  -4   1    4.82    1.04
   8   4   1    7.06    0.86
  -8   4  -1    5.06    0.84
  -8   4  -1    5.79    0.83
   8   4   1    4.41    1.03
  -8   4  -1    6.67    1.01
   8   4   1    5.81    0.63
   8   4   1    5.25    0.65
   9  -4   1    9.57    1.17
   9   4   1    7.55    1.29
   9   4   1    8.31    0.78
   9   4   1    9.16    0.76
  -9   4  -1    8.35    0.96
  -9   4  -1    8.31    1.06
   9   4   1    8.99    0.93
  10  -4   1    1.67    0.53
 -10   4  -1    2.41    0.59
  10   4   1    1.82    0.41
  10   4   1    2.52    0.81
  10   4   1    2.21    0.56
  10   4   1    1.91    0.42
 -10   4  -1    1.70    0.51
  -9   5   1    0.20    0.25
   9   5  -1   -0.05    0.29
  -9   5   1    0.15    0.23
   8  -5  -1    7.98    1.16
  -8   5   1    6.40    0.85
  -8   5   1    8.74    0.96
   8   5  -1    8.03    0.76
   8   5  -1    7.56    0.71
  -8   5   1    7.80    0.75
   8   5  -1    6.63    1.13
  -8   5   1    8.59    0.73
   7  -5  -1    7.13    1.14
  -7   5   1    5.30    0.70
  -7   5   1    3.92    0.73
   7   5  -1    6.63    0.69
   7   5  -1    6.93    1.15
  -7   5   1    6.40    0.63
  -7   5   1    5.05    0.82
   6  -5  -1   19.30    1.95
  -6  -5   1   17.56    1.50
   6  -5  -1   20.92    1.91
  -6   5   1   19.26    1.45
  -6   5   1   19.77    1.16
  -6   5   1   19.67    2.52
  -6   5   1   20.90    1.26
   6   5  -1   24.29    1.99
  -6   5   1   20.80    1.51
  -6   5   1   20.49    1.68
  -6   5   1   18.20    1.46
   6   5  -1   21.42    1.20
  -5  -5   1   10.67    1.18
   5  -5  -1   11.44    1.45
   5  -5  -1    9.84    1.37
  -5   5   1   11.86    1.10
   5   5  -1   10.65    0.89
  -5   5   1   12.54    1.14
  -5   5   1   12.00    1.94
  -5   5   1   14.81    1.66
   5   5  -1   10.22    0.94
  -5   5   1   11.72    0.83
  -5   5   1   10.36    1.12
  -5   5   1   11.37    0.88
  -4  -5   1   31.70    1.97
   4  -5  -1   30.09    2.19
  -4   5   1   33.02    1.60
  -4   5   1   32.00    1.91
  -4   5   1   33.22    1.80
  -4   5   1   31.27    3.05
   4   5  -1   31.55    1.64
  -4   5   1   32.52    1.85
  -4   5   1   31.34    1.48
   4   5  -1   32.83    1.61
  -3  -5   1   33.95    2.04
   3  -5  -1   33.70    2.25
   3  -5  -1   34.28    2.27
  -3  -5   1   34.29    2.03
  -3   5   1   33.56    1.78
   3   5  -1   34.36    2.97
   3   5  -1   33.13    1.67
  -3   5   1   33.94    1.85
   3   5  -1   35.01    1.67
  -3   5   1   32.99    1.50
  -3   5   1   32.55    1.42
  -3   5   1   32.41    3.08
  -3   5   1   30.92    1.85
  -3   5   1   32.19    2.02
   2  -5  -1   24.32    1.77
  -2  -5   1   24.57    1.74
   2  -5  -1   24.80    1.85
  -2  -5   1   22.01    1.67
  -2   5   1   24.98    1.63
   2   5  -1   25.18    1.38
   2   5  -1   24.93    1.41
  -2   5   1   25.54    1.42
  -2   5   1   25.86    1.47
  -2   5   1   25.67    2.59
   2   5  -1   24.66    2.50
  -2   5   1   27.86    1.51
   1  -5  -1   10.62    1.25
  -1  -5   1   10.78    1.20
  -1  -5   1    9.72    1.14
   1  -5  -1   11.16    1.08
   1   5  -1   10.63    0.89
  -1   5   1    9.77    0.80
  -1   5   1   10.13    0.93
   1   5  -1    9.91    0.97
  -1   5   1   10.29    1.65
  -1   5   1   10.14    0.81
   1   5  -1   11.17    1.66
   1   5  -1    9.99    0.99
   1   5  -1   10.18    0.89
  -1   5   1   10.38    0.91
   0  -5   1   59.18    3.29
   0  -5  -1   67.69    3.36
   0  -5  -1   63.93    3.18
   0  -5   1   62.18    3.37
   0   5   1   58.59    2.45
   0   5  -1   56.36    4.35
   0   5   1   58.36    2.59
   0   5   1   60.36    4.44
   0   5  -1   56.56    2.70
   0   5  -1   57.91    2.58
   0   5  -1   57.85    2.77
   0   5   1   59.59    2.81
   0   5  -1   61.28    3.00
   1  -5   1    5.07    0.93
   1  -5   1    4.65    1.09
  -1  -5  -1    3.76    0.79
  -1   5  -1    5.55    1.33
  -1   5  -1    4.14    0.69
  -1   5  -1    5.16    0.76
   1   5   1    4.50    0.52
   1   5   1    4.45    0.59
  -1   5  -1    4.68    0.65
   1   5   1    3.98    0.65
   1   5   1    4.20    1.23
  -1   5  -1    6.00    0.90
  -1   5  -1    4.41    0.47
   2  -5   1    9.41    1.19
   2  -5   1    8.81    1.24
   2   5   1   11.11    1.93
  -2   5  -1    7.81    1.02
  -2   5  -1    9.15    1.02
  -2   5  -1    9.19    0.72
  -2   5  -1    8.68    0.70
  -2   5  -1    8.84    0.94
   2   5   1    8.85    0.63
  -2   5  -1    9.41    0.88
   2   5   1    7.57    0.72
  -2   5  -1    9.28    1.58
   3  -5   1    5.08    1.03
   3  -5   1    8.49    1.30
  -3   5  -1    5.60    0.67
   3   5   1    6.24    0.54
  -3   5  -1    9.93    1.32
  -3   5  -1    4.82    0.73
  -3   5  -1    6.22    0.70
  -3   5  -1    7.69    0.98
  -3   5  -1    7.59    1.64
  -3   5  -1    8.03    0.95
   4  -5   1   26.54    2.34
   4  -5   1   30.53    2.19
  -4   5  -1   27.38    1.69
  -4   5  -1   26.37    1.45
  -4   5  -1   25.16    1.52
  -4   5  -1   25.89    1.70
  -4   5  -1   25.96    1.82
  -4   5  -1   28.69    2.78
   4   5   1   26.76    2.29
   5  -5   1    1.74    0.79
   5  -5   1    1.23    0.77
  -5   5  -1    1.23    0.66
   5   5   1    1.29    0.42
  -5   5  -1    0.61    0.47
  -5   5  -1    0.92    0.37
  -5   5  -1    1.81    1.12
   5   5   1    0.25    0.92
  -5   5  -1    1.12    0.41
  -5   5  -1    0.89    0.51
  -5   5  -1    0.24    0.51
   6  -5   1    6.40    1.08
  -6   5  -1    6.32    0.97
   6   5   1    6.34    0.76
  -6   5  -1    5.13    0.69
  -6   5  -1    6.42    0.98
   6   5   1    4.68    1.19
  -6   5  -1    6.33    0.79
   7  -5   1   15.43    1.56
   7   5   1   18.65    1.05
  -7   5  -1   18.41    1.40
  -7   5  -1   16.28    1.45
  -7   5  -1   17.16    1.13
  -7   5  -1   16.95    1.22
   7   5   1   17.38    1.89
  -8   5  -1   14.60    1.06
   8   5   1   12.00    1.62
   8   5   1   14.84    0.96
  -8   5  -1   14.09    1.30
  -8   5  -1   12.57    1.21
  -8   5  -1   15.60    1.01
   9  -5   1   -0.08    0.44
  -9   5  -1    0.71    0.43
  -9   5  -1   -0.23    0.24
  -9   5  -1    0.15    0.27
   9   5   1    0.56    0.30
   7  -6  -1    9.51    1.06
   7   6  -1    8.06    0.80
  -7   6   1   10.59    0.96
   6  -6  -1    0.89    0.58
  -6   6   1    0.55    0.53
  -6   6   1    0.84    0.49
   6   6  -1    1.07    0.42
  -6   6   1    1.35    0.47
  -6   6   1    0.39    1.03
   5  -6  -1   19.64    1.67
  -5   6   1   17.70    1.19
  -5   6   1   16.85    2.14
  -5   6   1   19.81    1.34
  -5   6   1   20.85    1.58
   5   6  -1   15.30    1.18
   4  -6  -1    0.98    0.77
  -4   6   1    1.40    0.44
   4   6  -1    0.22    0.47
  -4   6   1    1.50    0.43
  -4   6   1    3.19    1.15
   3  -6  -1   23.71    1.85
   3   6  -1   22.78    2.40
  -3   6   1   25.05    1.38
  -3   6   1   23.53    2.50
  -3   6   1   26.62    1.51
   3   6  -1   22.89    1.41
   3   6  -1   25.51    1.18
   2  -6  -1   13.76    1.36
  -2  -6   1   11.98    1.44
  -2   6   1   12.90    1.88
   2   6  -1   12.56    1.79
  -2   6   1   13.22    1.01
   2   6  -1   12.08    1.02
  -2   6   1   13.23    0.91
   2   6  -1   12.66    0.83
  -1  -6   1   11.88    1.42
   1  -6  -1   13.12    1.36
  -1   6   1   13.06    0.86
  -1   6   1   13.08    1.86
   1   6  -1   12.47    1.77
  -1   6   1   12.60    1.00
   1   6  -1   13.31    0.88
   1   6  -1   12.09    1.03
   0  -6   1   10.05    1.35
   0  -6  -1    8.39    1.26
   0   6   1   11.15    0.89
   0   6  -1   11.11    0.85
   0   6  -1   11.25    1.00
   0   6   1    9.71    0.71
   0   6  -1   11.00    1.66
   0   6   1   10.01    1.62
   1  -6   1   10.71    1.42
   1   6   1   13.00    1.85
  -1   6  -1   14.23    1.10
   1   6   1   13.26    0.76
   1   6   1   13.50    0.96
  -1   6  -1   12.63    1.78
  -1   6  -1   13.66    0.98
   2  -6   1    7.45    1.22
   2   6   1    8.48    1.62
  -2   6  -1    9.73    0.95
  -2   6  -1    8.25    0.66
   2   6   1    7.96    0.74
  -2   6  -1    9.24    1.75
  -2   6  -1    8.14    0.81
   3  -6   1   13.46    1.71
   3  -6   1   14.14    1.43
  -3   6  -1   11.84    0.99
  -3   6  -1   13.45    1.13
   3   6   1   12.74    0.91
  -3   6  -1   13.43    0.93
  -3   6  -1   13.90    1.88
   4  -6   1    1.99    0.78
  -4   6  -1    1.64    0.50
  -4   6  -1    2.20    0.44
  -4   6  -1    2.19    1.08
  -4   6  -1    1.34    0.49
  -4   6  -1    1.94    0.65
   4   6   1    2.30    0.45
   5  -6   1   19.46    1.64
  -5   6  -1   19.13    1.49
   5   6   1   19.69    1.12
  -5   6  -1   20.53    1.42
  -5   6  -1   19.53    1.34
  -5   6  -1   22.15    1.28
  -5   6  -1   20.42    2.31
   6  -6   1    0.49    0.55
  -6   6  -1    0.82    0.34
  -6   6  -1    0.64    0.45
  -6   6  -1    1.27    0.46
  -7   6  -1    5.48    0.64
   2   7  -1   11.15    0.77
  -2   7   1   11.89    0.82
   1   7  -1    0.35    0.29
  -1   7   1   -0.19    0.23
   0   7   1    9.44    0.68
   0   7  -1   10.76    0.79
   1   7   1    0.85    0.28
  -1   7  -1    0.84    0.33
  -1   7  -1    1.86    0.36
  -2   7  -1   12.76    0.94
  -2   7  -1   16.52    1.27
  13   0  -2    2.94    0.57
  13   0  -2    2.53    0.40
  13   0  -2    2.75    0.56
  13   0  -2    2.93    0.69
 -13   0   2    2.15    0.54
 -12   0   2    7.09    1.08
  12   0  -2   10.52    1.11
  12   0  -2   11.79    1.09
  12   0  -2    9.98    1.15
  11   0  -2   -0.04    0.41
 -11   0   2    0.36    0.56
  11   0  -2    0.37    0.53
  11   0  -2    0.00    0.57
  11   0  -2   -0.28    0.53
 -10   0   2    9.44    1.14
  10   0  -2    8.80    1.21
  10   0  -2    9.90    0.84
  10   0  -2    8.50    0.97
  10   0  -2    8.45    1.28
   9   0  -2    5.49    0.76
  -9   0   2    7.69    1.08
   9   0  -2    6.45    0.87
   8   0  -2   10.95    1.89
  -8   0   2   13.09    1.42
   8   0  -2   10.29    1.03
  -7   0   2   69.03    3.33
  -7   0   2   70.88    4.09
   7   0  -2   73.37    4.77
   7   0  -2   77.12    3.91
  -7   0   2   74.27    3.65
   6   0  -2   78.79    4.75
  -6   0   2   72.37    4.44
   6   0  -2   75.26    3.71
  -6   0   2   79.38    4.15
  -6   0   2   72.89    3.66
   6   0  -2   83.14    3.88
  -6   0   2   74.47    3.35
   5   0  -2    0.08    0.23
   5   0  -2    0.22    0.26
  -5   0   2    0.06    0.28
  -5   0   2   -0.09    0.20
   5   0  -2   -0.41    0.54
  -5   0   2   -0.42    0.42
  -5   0   2   -0.10    0.35
   4   0  -2   37.01    1.96
  -4   0   2   39.81    2.33
  -4   0   2   39.44    2.19
   4   0  -2   39.40    2.53
   4   0  -2   32.73    2.15
  -4   0   2   37.85    1.99
  -4   0   2   39.47    1.73
   4   0  -2   37.49    1.97
  -3   0   2  932.58   38.20
   3   0  -2  956.43   38.20
   3   0  -2  828.23   44.72
  -3   0   2  953.55   34.60
   3   0  -2  943.66   41.68
  -3   0   2 1000.00   44.57
  -3   0   2  958.21   41.86
   3   0  -2  882.07   44.70
  -2   0   2   40.55    2.36
   2   0  -2   44.44    2.47
   2   0  -2   44.08    2.48
  -2   0   2   47.26    2.31
  -2   0   2   44.66    1.81
   2   0  -2   44.19    2.06
  -2   0   2   45.37    2.08
   2   0  -2   44.69    2.41
   2   0  -2   45.17    2.17
  -1   0   2   12.46    0.77
  -1   0   2   12.17    0.69
   1   0  -2   12.57    0.69
   1   0  -2   11.78    0.67
  -1   0   2   11.31    0.75
  -1   0   2   11.95    0.57
   1   0  -2   11.13    0.86
   1   0  -2   11.10    0.75
  -1   0   2   11.28    0.70
   1   0  -2    9.59    0.73
   0   0   2   36.67    1.69
   0   0  -2   31.60    1.79
   0   0   2   34.18    1.82
   0   0  -2   33.45    1.81
   0   0   2   36.24    1.43
   0   0  -2   32.95    1.41
   0   0  -2   33.13    1.57
   0   0   2   34.72    1.57
   0   0   2   29.20    1.62
   0   0   2   34.18    1.74
   0   0  -2   34.28    1.66
   1   0   2   40.98    1.95
  -1   0  -2   46.15    2.10
  -1   0  -2   41.57    2.22
  -1   0  -2   42.75    1.96
  -2   0  -2   34.91    1.98
  -2   0  -2   34.35    1.85
  -2   0  -2   34.48    1.78
   2   0   2   36.17    2.04
  -2   0  -2   34.09    1.66
  -2   0  -2   31.48    1.61
  -3   0  -2   47.57    2.63
  -3   0  -2   43.23    2.14
  -3   0  -2   44.53    2.20
  -3   0  -2   45.22    2.36
  -3   0  -2   45.83    2.42
   3   0   2   46.86    2.77
   4   0   2   83.43    4.45
  -4   0  -2   76.83    4.21
  -4   0  -2   74.15    3.14
  -4   0  -2   76.70    3.84
  -4   0  -2   76.34    3.49
  -4   0  -2   71.73    3.95
   5   0   2    5.47    0.66
  -5   0  -2    5.83    0.59
   5   0   2    7.68    1.32
  -5   0  -2    4.93    0.67
  -5   0  -2    5.06    0.84
  -5   0  -2    4.84    0.74
  -6   0  -2    0.71    0.51
  -6   0  -2    1.12    0.47
   6   0   2    1.51    0.66
   6   0   2    0.73    0.91
  -6   0  -2    1.27    0.42
   6   0   2    0.90    0.44
   7   0   2   70.62    4.58
   7   0   2   67.98    3.61
   7   0   2   66.85    3.48
  -7   0  -2   65.98    3.88
  -7   0  -2   68.24    3.14
   8   0   2   72.16    3.66
   8   0   2   68.76    4.86
   8   0   2   67.41    2.72
  -8   0  -2   66.84    3.29
  -8   0  -2   72.97    3.64
   8   0   2   66.47    3.84
   9   0   2    3.00    0.74
  -9   0  -2    5.45    1.03
   9   0   2    4.99    0.97
   9   0   2    4.78    0.89
  -9   0  -2    4.72    1.06
  10   0   2   21.57    1.87
  10   0   2   21.73    1.54
  10   0   2   21.99    1.85
  10   0   2   20.85    1.60
  11   0   2   11.01    1.07
  11   0   2   10.85    1.41
  11   0   2   10.06    1.37
  11   0   2   11.60    1.07
  11   0   2   11.57    1.24
 -12   0  -2   -0.08    0.51
  12   0   2    0.12    0.38
  12   0   2    0.57    0.39
  12   0   2    0.12    0.37
  12   0   2    0.29    0.56
  13   0   2   -0.30    0.24
 -13   0  -2    0.12    0.39
  13   0   2   -0.01    0.39
  13   0   2    0.20    0.24
  13  -1  -2    9.50    1.04
  13  -1  -2   10.09    0.93
  13  -1  -2    9.28    0.96
  13   1  -2   10.49    0.80
  13   1  -2   11.27    0.80
  13   1  -2    9.82    1.10
 -13   1   2   10.98    0.81
  12  -1  -2    6.23    0.95
 -12  -1   2    6.09    0.85
  12   1  -2    6.40    0.92
  12   1  -2    5.46    0.69
  12   1  -2    7.34    0.88
  12   1  -2    5.65    0.74
 -12   1   2    4.68    0.67
  11  -1  -2    6.10    1.07
 -11  -1   2    5.80    0.94
  11  -1  -2    5.66    0.75
  11   1  -2    5.61    0.86
  11   1  -2    4.01    0.88
  11   1  -2    6.12    0.81
 -11   1   2    4.11    0.74
  11   1  -2    5.91    0.83
  11   1  -2    5.53    0.84
  10  -1  -2   15.25    1.34
 -10  -1   2   14.16    1.49
  10   1  -2   16.19    1.43
  10   1  -2   14.91    1.17
  10   1  -2   17.11    1.33
  10   1  -2   14.54    1.45
 -10   1   2   14.55    1.38
  10   1  -2   17.08    1.62
  10   1  -2   16.43    1.32
   9  -1  -2   24.37    1.52
  -9  -1   2   29.78    1.98
   9  -1  -2   28.23    1.88
   9   1  -2   26.30    1.92
   9   1  -2   28.98    1.89
   9   1  -2   26.11    1.55
   9   1  -2   26.48    1.62
   9   1  -2   29.84    1.78
   9   1  -2   29.21    2.02
   8  -1  -2   21.54    2.54
  -8  -1   2   23.12    1.64
   8   1  -2   22.68    1.34
   8   1  -2   24.15    1.54
   8   1  -2   21.23    1.77
   8   1  -2   23.38    1.70
   8   1  -2   21.43    2.43
   7  -1  -2   28.86    2.62
   7  -1  -2   29.76    1.87
  -7  -1   2   31.02    1.82
  -7   1   2   29.94    2.10
  -7   1   2   26.15    1.79
   7   1  -2   29.60    1.96
   7   1  -2   30.55    1.91
   7   1  -2   33.01    2.73
  -6  -1   2   26.38    1.59
   6  -1  -2   23.16    2.05
  -6  -1   2   25.60    2.06
   6  -1  -2   26.58    2.36
   6  -1  -2   28.59    1.76
   6   1  -2   29.02    1.76
  -6   1   2   28.43    1.89
  -6   1   2   29.96    1.66
   6   1  -2   29.28    2.39
  -5  -1   2    8.19    0.98
  -5  -1   2   10.12    0.81
   5  -1  -2   10.76    1.00
   5  -1  -2    9.71    1.26
   5  -1  -2   10.28    1.19
   5  -1  -2    9.56    0.85
  -5  -1   2    9.38    1.02
  -5   1   2   10.88    0.97
  -5   1   2    8.12    0.76
  -5   1   2    8.61    0.98
   5   1  -2   10.04    0.83
  -5   1   2    9.08    0.88
   5   1  -2   10.77    1.29
   4  -1  -2   17.38    1.35
  -4  -1   2   15.45    1.24
   4  -1  -2   16.06    1.13
   4  -1  -2   14.82    1.14
   4  -1  -2   14.22    1.08
  -4  -1   2   15.43    1.27
   4   1  -2   20.37    1.56
   4   1  -2   17.34    1.09
  -4   1   2   17.73    1.31
  -4   1   2   19.03    1.11
  -4   1   2   18.66    1.16
  -4   1   2   17.30    1.19
  -4   1   2   17.70    1.03
   3  -1  -2  179.34    7.80
  -3  -1   2  177.93    9.00
  -3  -1   2  177.25    6.86
  -3  -1   2  162.86    7.76
   3  -1  -2  170.46    7.89
  -3  -1   2  174.57    8.59
   3  -1  -2  186.13    8.43
   3  -1  -2  180.45    9.07
  -3   1   2  187.96    7.09
  -3   1   2  191.42    7.81
  -3   1   2  192.04    7.33
  -3   1   2  186.03    9.11
   3   1  -2  187.01    7.76
  -3   1   2  189.26    8.43
   3   1  -2  195.41    9.28
   2  -1  -2  136.29    6.43
   2  -1  -2  145.92    6.89
   2  -1  -2  142.49    6.37
   2  -1  -2  144.17    7.38
  -2  -1   2  139.29    6.41
  -2  -1   2  152.92    7.34
  -2  -1   2  142.01    6.97
  -2   1   2  160.30    7.50
  -2   1   2  155.17    5.83
   2   1  -2  161.54    7.62
   2   1  -2  158.25    6.40
  -2   1   2  156.31    6.38
   2   1  -2  146.99    7.34
  -2   1   2  160.62    5.99
   1  -1  -2  134.84    6.95
   1  -1  -2  143.17    6.35
  -1  -1   2  131.79    5.96
   1  -1  -2  134.54    5.90
  -1  -1   2  143.04    6.46
  -1  -1   2  140.53    6.74
  -1  -1   2  137.40    5.96
  -1   1   2  144.66    5.43
  -1   1   2  138.53    5.48
  -1   1   2  146.57    5.88
   1   1  -2  144.95    5.99
  -1   1   2  143.09    6.97
   1   1  -2  144.40    7.03
   1   1  -2  139.59    6.75
  -1   1   2  134.35    5.87
   0  -1   2  133.20    6.55
   0  -1   2  127.60    5.71
   0  -1   2  136.95    6.17
   0  -1  -2  126.27    6.66
   0   1   2  131.32    5.55
   0   1  -2  137.92    6.69
   0   1   2  143.72    5.55
   0   1   2  133.34    6.69
   0   1   2  135.11    5.18
   0   1  -2  129.03    5.72
   0   1  -2  130.35    6.10
   0   1  -2  137.87    6.10
   1  -1   2  169.31    8.35
  -1  -1  -2  170.31    8.44
   1  -1   2  176.55    7.82
   1  -1   2  164.52    7.29
  -1   1  -2  166.06    6.76
  -1   1  -2  168.05    7.79
  -1   1  -2  170.32    7.23
   1   1   2  165.64    7.01
   1   1   2  174.66    7.01
  -1   1  -2  172.37    8.21
   1   1   2  170.70    8.32
  -1   1  -2  167.31    8.25
   1   1   2  172.19    6.57
   2  -1   2   96.04    4.39
   2  -1   2   91.15    4.13
   2  -1   2   96.54    4.71
  -2   1  -2   90.22    4.58
   2   1   2   86.38    3.88
   2   1   2   92.79    4.72
  -2   1  -2   93.60    4.41
  -2   1  -2   92.00    4.10
  -2   1  -2   88.72    4.62
  -2   1  -2   87.20    3.81
  -3  -1  -2   70.01    3.17
   3  -1   2   74.06    3.90
  -3  -1  -2   71.54    4.01
   3  -1   2   76.85    3.64
   3  -1   2   72.83    3.47
  -3   1  -2   75.39    3.91
  -3   1  -2   77.44    3.71
  -3   1  -2   76.21    3.08
  -3   1  -2   74.14    3.79
  -3   1  -2   71.06    3.44
   3   1   2   73.42    3.99
  -3   1  -2   71.13    3.22
   3   1   2   70.80    3.25
  -4  -1  -2    7.96    0.59
   4  -1   2    7.49    0.81
   4  -1   2    7.32    0.70
  -4  -1  -2    7.11    0.89
  -4   1  -2    7.23    0.67
  -4   1  -2    7.98    0.77
  -4   1  -2    7.53    0.80
  -4   1  -2    6.40    0.70
  -4   1  -2    7.34    0.82
   4   1   2    7.60    0.99
   4   1   2    7.43    0.62
  -5  -1  -2   46.81    2.66
   5  -1   2   49.20    2.58
   5  -1   2   51.15    3.34
   5  -1   2   47.68    2.62
  -5  -1  -2   47.24    2.35
  -5  -1  -2   47.77    3.06
   5   1   2   47.17    2.41
  -5   1  -2   48.22    2.74
  -5   1  -2   46.59    2.99
   5   1   2   52.29    3.23
  -5   1  -2   47.61    2.27
   6  -1   2   27.48    1.86
   6  -1   2   24.13    1.61
  -6  -1  -2   25.27    1.82
   6  -1   2   27.77    2.47
  -6   1  -2   30.36    1.64
   6   1   2   29.85    1.72
   6   1   2   27.70    1.81
   6   1   2   33.17    2.49
  -6   1  -2   28.28    1.94
   7  -1   2   10.91    1.32
  -7  -1  -2    8.07    1.09
   7  -1   2   11.34    1.60
   7   1   2    9.40    1.52
   7   1   2    7.89    1.10
   7   1   2    8.62    0.89
   7   1   2    7.95    0.95
  -7   1  -2    8.67    1.09
   7   1   2    8.23    0.82
  -8  -1  -2    2.32    0.61
   8  -1   2    3.34    1.50
   8  -1   2    3.66    0.91
   8   1   2    2.39    0.60
   8   1   2    2.85    0.65
   8   1   2    2.23    0.57
   8   1   2    2.89    0.81
  -9  -1  -2    5.41    1.02
  -9  -1  -2    5.65    1.00
   9  -1   2    6.64    1.08
   9  -1   2    5.72    1.11
   9  -1   2    4.38    0.81
   9   1   2    6.90    0.86
   9   1   2    7.14    0.96
   9   1   2    6.20    0.77
   9   1   2    7.93    1.25
   9   1   2    7.36    1.02
   9   1   2    7.14    0.85
   9   1   2    7.74    0.96
  10  -1   2   12.56    1.47
  10  -1   2   11.78    1.46
 -10  -1  -2   12.93    1.43
 -10  -1  -2    9.75    1.18
  10   1   2   10.69    1.00
  10   1   2   12.14    1.07
  10   1   2   11.62    1.13
  10   1   2   11.87    1.13
  10   1   2   11.54    1.43
 -10   1  -2    9.39    1.33
  10   1   2   11.10    1.05
  10   1   2   11.63    1.37
  11  -1   2   11.38    1.24
  11  -1   2   11.71    1.24
 -11   1  -2   12.22    1.22
  11   1   2   11.62    1.01
  11   1   2   10.45    0.95
  11   1   2   11.67    1.29
  11   1   2   11.06    1.37
  11   1   2   12.13    1.18
  11   1   2   11.84    1.02
  11   1   2   10.69    1.13
 -12  -1  -2    8.73    1.00
  12  -1   2    8.78    0.88
  12  -1   2    9.16    1.05
  12  -1   2    8.60    0.96
 -12   1  -2    7.76    0.94
  12   1   2    8.24    0.86
  12   1   2    9.35    0.65
  12   1   2    8.72    1.02
  12   1   2    6.05    1.00
  12   1   2    8.85    0.62
  12   1   2    7.60    0.91
  12   1   2    8.73    0.80
  13   2  -2    0.76    0.33
  12  -2  -2    3.47    0.78
 -12  -2   2    3.57    0.66
  12   2  -2    3.35    0.44
  12   2  -2    6.61    0.83
 -12   2   2    5.48    0.60
  12   2  -2    4.03    0.60
  12   2  -2    4.55    0.74
 -11  -2   2    0.00    0.59
  11  -2  -2    1.17    0.54
 -11   2   2    0.71    0.35
  11   2  -2    0.80    0.72
  11   2  -2    0.19    0.49
  11   2  -2    0.43    0.46
  11   2  -2    0.46    0.45
  11   2  -2    1.05    0.56
  11   2  -2    0.47    0.51
  11   2  -2    0.93    0.48
 -10  -2   2    9.70    1.38
 -10  -2   2   10.95    1.40
  10  -2  -2   11.37    1.26
 -10   2   2   12.09    1.06
  10   2  -2   11.92    1.21
  10   2  -2   11.49    1.04
  10   2  -2    8.33    1.25
  10   2  -2   12.03    1.26
  10   2  -2   13.11    1.24
  10   2  -2   10.89    1.03
  10   2  -2   12.64    1.12
  10   2  -2   12.66    1.09
   9  -2  -2   17.16    1.57
  -9  -2   2   16.28    1.45
   9   2  -2   16.55    1.32
   9   2  -2   15.45    1.57
  -9   2   2   16.21    1.23
   9   2  -2   15.36    1.21
   9   2  -2   16.28    1.27
   9   2  -2   17.31    1.44
   9   2  -2   16.47    1.26
   9   2  -2   13.44    1.32
   9   2  -2   16.56    1.16
  -8  -2   2   30.16    1.99
   8   2  -2   32.61    2.15
   8   2  -2   31.95    1.73
   8   2  -2   30.94    1.62
   8   2  -2   30.17    1.73
   8   2  -2   29.96    1.84
   8   2  -2   30.84    1.63
   7  -2  -2    4.93    0.89
   7  -2  -2    5.04    1.58
   7  -2  -2    5.61    1.44
  -7  -2   2    5.40    0.79
   7   2  -2    5.00    1.41
   7   2  -2    7.20    0.80
   7   2  -2    6.09    1.00
   7   2  -2    3.55    0.71
   7   2  -2    6.23    0.76
   6  -2  -2   10.68    1.11
  -6  -2   2   11.33    0.94
   6  -2  -2   10.40    1.41
   6  -2  -2   13.05    1.36
   6  -2  -2   12.67    1.71
   6   2  -2   14.15    1.20
   6   2  -2   11.70    1.73
   6   2  -2   13.71    1.10
  -6   2   2   12.82    1.09
   5  -2  -2   42.73    2.39
  -5  -2   2   35.92    2.07
   5  -2  -2   39.41    2.36
   5  -2  -2   39.79    2.39
   5  -2  -2   39.87    2.66
  -5   2   2   43.82    2.25
   5   2  -2   40.45    2.20
   5   2  -2   48.25    3.18
  -5   2   2   40.06    2.70
  -5   2   2   40.77    2.35
  -5   2   2   43.67    2.15
   4  -2  -2   97.38    4.67
   4  -2  -2   96.43    4.42
   4  -2  -2   98.99    5.05
  -4  -2   2   88.59    4.19
   4  -2  -2   94.51    4.45
  -4  -2   2   95.60    4.94
  -4   2   2   91.60    4.36
  -4   2   2   91.08    5.09
  -4   2   2   87.98    3.97
   4   2  -2   94.61    5.43
  -4   2   2   91.07    4.09
   4   2  -2   90.50    4.26
   3  -2  -2   11.01    0.88
   3  -2  -2    9.71    0.94
   3  -2  -2   10.77    0.84
   3  -2  -2    9.48    0.84
  -3  -2   2   10.10    0.83
   3   2  -2   11.07    0.82
  -3   2   2   11.75    0.84
  -3   2   2   11.42    1.04
  -3   2   2   11.00    0.82
  -3   2   2   11.32    0.79
   3   2  -2   10.03    1.21
  -2  -2   2   10.82    0.74
   2  -2  -2   10.27    0.75
  -2   2   2   11.78    0.74
  -2   2   2   13.81    1.08
  -2   2   2   12.89    0.84
   2   2  -2   14.05    0.91
   2   2  -2   12.53    1.23
  -2   2   2   11.89    0.80
  -1  -2   2   57.03    2.46
  -1  -2   2   52.11    2.74
  -1   2   2   54.81    3.08
   1   2  -2   53.16    2.60
  -1   2   2   53.84    2.24
  -1   2   2   52.76    2.43
   1   2  -2   55.38    3.24
  -1   2   2   54.87    2.39
   0  -2   2  194.25    9.75
   0  -2   2  198.20    8.53
   0  -2   2  196.30    9.20
   0   2   2  204.68    8.25
   0   2   2  206.29    7.76
   0   2  -2  202.79    8.53
   0   2  -2  202.84   10.11
   0   2  -2  193.80    7.54
   1  -2   2   26.13    1.53
   1  -2   2   26.96    1.62
   1  -2   2   26.44    1.47
   1   2   2   26.05    1.76
   1   2   2   26.69    1.39
  -1   2  -2   27.11    1.51
  -1   2  -2   26.51    1.26
   2  -2   2   75.80    3.76
   2  -2   2   73.72    3.91
   2  -2   2   75.28    3.70
   2  -2   2   76.34    4.22
  -2   2  -2   86.12    4.05
  -2   2  -2   83.64    3.74
   2   2   2   81.22    4.36
  -2   2  -2   79.27    3.45
   3  -2   2    5.94    0.81
   3  -2   2    5.90    0.70
   3  -2   2    6.09    0.72
   3  -2   2    6.58    0.84
  -3  -2  -2    5.46    0.81
   3   2   2    7.39    0.47
  -3   2  -2    7.03    0.74
  -3   2  -2    6.48    0.63
   3   2   2    7.17    0.44
  -3   2  -2    6.20    0.67
   3   2   2    7.49    0.93
   4  -2   2   57.63    3.49
  -4  -2  -2   58.08    3.61
   4  -2   2   58.26    3.14
   4  -2   2   56.51    3.12
   4  -2   2   57.49    3.22
   4   2   2   63.91    3.73
   4   2   2   60.81    2.73
  -4   2  -2   64.03    3.17
  -4   2  -2   63.62    2.98
  -4   2  -2   62.78    3.16
  -5  -2  -2   19.62    1.13
   5  -2   2   21.07    1.49
   5  -2   2   19.61    1.68
   5   2   2   19.93    1.19
   5   2   2   21.21    1.90
  -5   2  -2   20.07    1.44
   5   2   2   17.37    1.45
   6  -2   2   43.49    2.64
   6  -2   2   43.94    2.63
   6   2   2   44.31    3.29
   6   2   2   45.07    2.33
  -6   2  -2   45.58    2.65
   6   2   2   41.43    2.52
   7  -2   2    5.78    1.06
   7  -2   2    2.39    1.23
   7   2   2    6.20    0.70
   7   2   2    5.63    0.70
   7   2   2    5.43    0.74
   7   2   2    6.20    1.11
   8  -2   2    9.56    1.19
   8  -2   2    8.72    1.30
  -8   2  -2    9.57    1.17
   8   2   2    8.71    1.33
   8   2   2    8.09    0.85
   8   2   2    9.46    1.13
   8   2   2    7.68    0.86
   8   2   2    7.44    0.85
   8   2   2    8.12    0.94
  -9  -2  -2   20.41    1.51
   9  -2   2   22.83    1.60
  -9  -2  -2   21.22    1.70
   9   2   2   25.19    1.97
   9   2   2   23.43    1.35
   9   2   2   25.75    1.47
   9   2   2   24.52    1.73
   9   2   2   25.32    1.47
   9   2   2   20.99    1.26
  -9   2  -2   22.87    1.58
   9   2   2   23.32    1.37
  10  -2   2   56.22    3.21
 -10  -2  -2   52.13    3.07
  10  -2   2   57.03    2.59
  10   2   2   55.82    2.52
  10   2   2   57.26    3.26
  10   2   2   53.91    2.54
  10   2   2   54.25    2.37
  10   2   2   52.25    2.75
 -10   2  -2   52.94    2.65
  11  -2   2    1.70    0.64
  11   2   2    2.30    0.52
  11   2   2    1.86    0.51
 -11   2  -2    2.20    0.54
  11   2   2    2.41    0.57
  11   2   2    2.02    0.48
  11   2   2    1.76    0.78
  12  -2   2    4.77    0.68
 -12  -2  -2    4.19    0.69
  12   2   2    3.86    0.60
  12   2   2    3.65    0.58
 -12   2  -2    4.02    0.51
  12   2   2    3.99    0.58
  12   2   2    4.49    0.63
  12  -3  -2   20.39    1.04
 -12  -3   2   21.85    1.34
  12   3  -2   19.86    1.22
  12   3  -2   19.31    1.18
  12   3  -2   20.64    1.22
 -11  -3   2   22.71    1.67
  11  -3  -2   22.28    1.47
  11   3  -2   21.25    1.31
  11   3  -2   21.87    1.35
  11   3  -2   22.67    1.76
  11   3  -2   22.21    1.39
  11   3  -2   23.75    1.46
  10  -3  -2    5.08    0.93
 -10  -3   2    5.23    1.04
 -10  -3   2    4.96    1.04
  10   3  -2    4.40    0.72
  10   3  -2    4.17    0.81
  10   3  -2    5.69    0.88
  10   3  -2    4.32    0.99
  10   3  -2    4.65    0.70
  -9  -3   2   17.21    1.54
  -9   3   2   14.85    1.48
   9   3  -2   15.46    1.12
   9   3  -2   18.56    1.09
   9   3  -2   18.09    1.66
   9   3  -2   17.49    1.19
  -9   3   2   16.68    0.98
   9   3  -2   16.85    1.46
   9   3  -2   17.13    1.25
   9   3  -2   17.53    1.24
   8  -3  -2    5.85    1.13
  -8  -3   2    4.41    0.86
   8   3  -2    7.19    0.90
  -8   3   2    6.97    0.70
   8   3  -2    6.19    0.92
   8   3  -2    4.86    0.77
   8   3  -2    5.03    0.73
  -8   3   2    5.94    1.02
   8   3  -2    6.25    0.75
   8   3  -2    4.80    0.80
   8   3  -2    4.80    1.01
   7  -3  -2   35.75    2.57
  -7  -3   2   36.27    2.17
  -7   3   2   34.80    2.25
   7   3  -2   35.22    1.78
  -7   3   2   33.60    2.20
   7   3  -2   38.96    1.83
   7   3  -2   36.41    1.77
   7   3  -2   36.52    2.37
   6  -3  -2   17.19    1.62
  -6  -3   2   17.45    1.25
   6  -3  -2   19.50    1.62
   6   3  -2   16.36    1.46
   6   3  -2   14.55    2.18
   6   3  -2   15.95    1.05
  -6   3   2   15.42    1.47
   6   3  -2   17.39    1.18
   6   3  -2   11.22    1.28
  -6   3   2   16.08    1.45
   6   3  -2   16.74    1.03
   5  -3  -2   46.83    2.65
  -5  -3   2   44.47    2.32
   5  -3  -2   48.33    2.66
   5  -3  -2   43.53    2.98
  -5   3   2   45.04    3.73
  -5   3   2   41.82    2.56
   5   3  -2   40.26    1.93
  -5   3   2   47.67    2.48
   5   3  -2   43.52    2.47
   5   3  -2   42.54    3.50
   5   3  -2   43.55    2.54
  -4  -3   2   16.42    1.12
   4  -3  -2   17.57    1.56
   4  -3  -2   16.79    1.28
   4  -3  -2   16.48    1.32
   4   3  -2   16.39    1.93
  -4   3   2   17.00    1.30
  -4   3   2   17.13    1.23
  -4   3   2   18.25    1.30
   4   3  -2   18.10    1.31
   4   3  -2   15.21    1.33
   3  -3  -2   33.12    2.15
   3  -3  -2   31.57    1.87
  -3  -3   2   32.47    1.72
   3  -3  -2   33.07    1.86
  -3   3   2   34.13    1.75
   3   3  -2   31.81    1.93
  -3   3   2   33.33    1.85
  -3   3   2   33.62    1.87
   3   3  -2   33.04    1.89
   3   3  -2   30.84    2.61
   2  -3  -2   25.53    1.42
   2  -3  -2   25.54    1.47
  -2  -3   2   24.85    1.39
  -2  -3   2   26.69    1.36
  -2   3   2   24.50    1.43
  -2   3   2   24.63    1.50
   2   3  -2   24.17    2.12
   2   3  -2   24.69    1.51
  -2   3   2   26.03    1.35
  -1  -3   2   59.06    2.95
  -1  -3   2   58.54    2.97
   1  -3  -2   61.54    2.87
   1   3  -2   66.34    3.10
  -1   3   2   67.57    2.92
  -1   3   2   65.32    2.93
   1   3  -2   66.79    4.02
  -1   3   2   66.76    2.72
   0  -3   2   17.88    1.27
   0  -3   2   18.28    1.16
   0  -3   2   17.32    1.14
   0   3  -2   19.48    1.25
   0   3   2   18.18    1.20
   0   3   2   18.29    0.93
   1  -3   2   74.05    3.64
   1  -3   2   74.87    3.63
   1  -3   2   77.12    4.11
   1   3   2   75.24    3.37
   1   3   2   73.35    4.36
  -1   3  -2   76.80    3.64
  -1   3  -2   74.71    3.40
   2  -3   2   47.86    3.01
   2  -3   2   48.05    2.64
   2  -3   2   50.75    2.69
   2   3   2   52.47    3.25
  -2   3  -2   49.69    2.46
  -2   3  -2   50.22    2.65
   3  -3   2   43.24    2.62
   3  -3   2   44.01    2.67
   3  -3   2   46.12    3.01
   3   3   2   47.87    3.22
  -3   3  -2   56.49    2.56
  -3   3  -2   51.33    2.70
  -3   3  -2   49.31    2.50
   4  -3   2   10.59    1.34
   4  -3   2    7.98    1.07
   4  -3   2    8.54    1.02
   4  -3   2    6.59    1.05
   4  -3   2    6.94    1.14
  -4   3  -2    7.01    0.92
   4   3   2    6.95    1.05
  -4   3  -2    7.04    0.94
   4   3   2    4.91    1.19
  -4   3  -2    8.22    0.96
   5  -3   2   21.85    1.70
   5  -3   2   22.89    1.89
  -5  -3  -2   21.69    1.12
   5  -3   2   21.00    1.67
   5   3   2   17.59    0.97
   5   3   2   15.24    1.96
   5   3   2   19.32    1.61
   5   3   2   17.73    1.20
   6  -3   2   18.71    1.96
   6   3   2   18.16    1.02
   6   3   2   20.24    1.69
   6   3   2   17.55    1.21
   7  -3   2   34.52    2.38
   7   3   2   32.43    1.60
  -7   3  -2   33.48    1.76
   7   3   2   33.12    1.74
   7   3   2   34.06    2.36
  -7   3  -2   34.00    2.09
   8  -3   2    4.39    0.94
  -8  -3  -2    6.47    0.95
  -8   3  -2    5.67    0.76
   8   3   2    6.53    0.78
   8   3   2    5.06    0.64
   8   3   2    4.97    0.68
   8   3   2    5.28    1.14
   8   3   2    6.49    0.89
  -9  -3  -2    8.27    1.20
   9  -3   2   10.45    1.23
   9   3   2    9.83    0.88
   9   3   2   10.24    0.87
  -9   3  -2   10.96    0.95
   9   3   2    9.76    1.43
   9   3   2   10.18    0.99
  10  -3   2    8.61    0.94
  10   3   2    8.96    0.88
  10   3   2    8.99    0.83
 -10   3  -2   10.38    0.79
  10   3   2    9.39    0.86
  10   3   2    7.72    1.26
  11  -3   2    4.63    0.88
  11  -3   2    5.67    0.59
 -11  -3  -2    5.84    1.00
  11   3   2    5.21    0.69
  11   3   2    4.28    0.88
  11   3   2    7.39    0.70
  11   3   2    7.04    0.87
  11   3   2    6.22    0.68
 -11  -4   2    6.98    0.97
  11  -4  -2    8.71    0.83
  11   4  -2    8.23    0.83
  11   4  -2    7.94    0.73
  11   4  -2    8.20    0.72
 -11   4   2    8.99    0.83
 -11   4   2    7.61    0.77
 -10  -4   2   16.52    1.43
  10  -4  -2   16.47    1.34
 -10   4   2   17.43    1.18
 -10   4   2   15.72    1.25
  10   4  -2   17.67    1.10
  10   4  -2   16.96    1.52
  10   4  -2   16.54    1.06
  -9  -4   2    1.74    0.73
   9   4  -2    2.39    0.85
  -9   4   2    1.72    0.54
   9   4  -2    2.24    0.48
   9   4  -2    1.90    0.45
  -9   4   2    0.43    0.44
  -9   4   2    2.60    0.70
  -8  -4   2   10.41    1.21
   8  -4  -2   11.25    1.54
  -8   4   2   11.92    1.06
  -8   4   2   11.48    1.14
   8   4  -2   12.71    1.05
  -8   4   2   11.59    1.37
  -8   4   2   13.02    1.35
   8   4  -2   11.70    0.94
   8   4  -2   11.34    0.94
   8   4  -2   10.92    1.35
  -7  -4   2   14.04    1.32
   7  -4  -2   14.38    1.70
  -7   4   2   15.87    1.28
  -7   4   2   15.08    1.17
   7   4  -2   16.08    1.35
   7   4  -2   15.33    1.56
  -7   4   2   13.50    1.45
   7   4  -2   13.84    1.04
  -7   4   2   13.88    1.47
   7   4  -2   14.62    1.24
   7   4  -2   13.51    1.02
  -6  -4   2   24.95    1.69
  -6  -4   2   26.57    1.75
   6  -4  -2   26.90    2.17
   6  -4  -2   27.78    2.15
   6  -4  -2   23.78    2.11
  -6   4   2   26.47    1.54
  -6   4   2   24.58    1.97
  -6   4   2   28.28    1.78
   6   4  -2   26.55    1.78
  -6   4   2   29.03    1.78
   6   4  -2   25.79    1.42
  -6   4   2   24.87    1.90
  -6   4   2   27.54    2.82
   6   4  -2   26.52    1.45
  -6   4   2   25.05    1.97
   6   4  -2   25.46    2.00
  -6   4   2   26.29    1.68
   5  -4  -2    2.18    0.70
  -5  -4   2    1.89    0.53
   5  -4  -2    2.91    0.82
  -5  -4   2    2.38    0.67
  -5   4   2    2.00    0.48
   5   4  -2    2.12    0.77
  -5   4   2    2.22    1.06
  -5   4   2    2.31    0.59
  -5   4   2    1.60    0.65
   5   4  -2    2.09    0.51
   5   4  -2    1.84    0.45
  -5   4   2    1.75    0.45
  -5   4   2    3.29    0.67
  -4  -4   2   76.75    3.79
  -4  -4   2   81.15    3.86
   4  -4  -2   77.50    4.09
   4  -4  -2   82.52    4.17
   4   4  -2   72.05    5.39
  -4   4   2   81.88    3.86
  -4   4   2   78.17    5.47
   4   4  -2   80.06    3.23
   4   4  -2   76.56    3.16
  -4   4   2   80.82    3.43
   4   4  -2   82.92    4.10
  -4   4   2   81.99    3.50
  -4   4   2   78.39    3.36
   3  -4  -2   47.43    2.60
   3  -4  -2   48.76    2.63
  -3  -4   2   47.84    2.42
  -3  -4   2   48.71    2.41
  -3   4   2   47.31    2.57
  -3   4   2   46.14    3.62
   3   4  -2   46.39    3.57
  -3   4   2   44.78    2.16
   3   4  -2   48.61    2.15
   3   4  -2   40.59    2.36
  -3   4   2   45.33    2.12
   3   4  -2   42.63    2.66
  -3   4   2   44.18    2.12
   3   4  -2   41.06    3.57
  -3   4   2   47.28    2.40
   2  -4  -2   36.68    2.16
  -2  -4   2   36.25    2.05
  -2  -4   2   37.97    2.06
   2  -4  -2   39.07    2.14
   2   4  -2   38.96    1.87
  -2   4   2   37.97    3.12
  -2   4   2   38.35    2.03
   2   4  -2   36.21    2.05
   2   4  -2   37.59    3.07
  -2   4   2   37.97    1.77
   2   4  -2   38.63    3.10
  -2   4   2   39.62    1.99
  -1  -4   2   39.42    2.16
  -1  -4   2   35.92    2.10
   1  -4  -2   38.72    2.05
  -1   4   2   40.31    1.91
   1   4  -2   39.83    3.12
   1   4  -2   38.64    2.13
   1   4  -2   36.84    1.88
  -1   4   2   40.05    1.93
  -1   4   2   37.72    1.69
  -1   4   2   41.52    3.20
   0  -4   2   29.11    1.86
   0  -4   2   29.58    1.84
   0  -4  -2   31.03    1.61
   0   4   2   29.67    1.34
   0   4   2   30.08    1.48
   0   4  -2   29.94    1.81
   0   4   2   31.66    2.70
   0   4  -2   30.89    1.61
   0   4  -2   30.18    2.64
   1  -4   2   14.32    1.30
   1  -4   2   14.49    1.25
   1  -4   2   14.32    1.53
  -1   4  -2   14.72    1.20
   1   4   2   14.80    1.81
  -1   4  -2   16.53    1.19
  -1   4  -2   13.48    1.05
  -1   4  -2   16.48    1.81
   2  -4   2   11.54    1.16
   2  -4   2   12.14    1.25
   2  -4   2   10.51    1.46
  -2   4  -2   12.04    1.65
  -2   4  -2   12.81    1.11
  -2   4  -2   11.45    1.12
  -2   4  -2   11.82    1.00
   3  -4   2   17.16    1.51
   3  -4   2   15.30    1.47
  -3   4  -2   17.26    1.37
  -3   4  -2   16.00    1.29
   3   4   2   15.10    1.73
  -3   4  -2   19.19    2.04
  -3   4  -2   14.75    1.26
   3   4   2   18.02    2.04
  -3   4  -2   17.44    1.22
   4  -4   2   20.78    1.84
   4  -4   2   22.61    1.81
   4  -4   2   18.23    2.09
   4   4   2   23.12    1.93
  -4   4  -2   21.37    1.68
  -4   4  -2   20.46    1.47
  -4   4  -2   19.65    1.49
  -4   4  -2   21.10    1.51
  -4   4  -2   21.27    1.51
  -4   4  -2   21.87    2.33
   5  -4   2   22.93    1.95
   5  -4   2   21.81    2.09
   5   4   2   23.84    2.03
  -5   4  -2   21.64    1.68
   5   4   2   22.98    1.13
  -5   4  -2   22.78    1.78
  -5   4  -2   23.50    1.62
   6  -4   2   30.67    2.26
   6   4   2   31.57    1.46
   6   4   2   29.63    1.68
   6   4   2   32.86    1.47
   6   4   2   33.34    2.50
  -6   4  -2   33.04    1.97
  -6   4  -2   30.00    2.12
  -6   4  -2   29.73    2.05
  -7  -4  -2   20.25    1.57
   7  -4   2   21.61    1.81
  -7   4  -2   19.29    1.62
   7   4   2   18.44    1.31
   7   4   2   19.73    1.13
   7   4   2   18.20    1.09
   7   4   2   19.64    1.96
  -7   4  -2   18.42    1.49
  -7   4  -2   18.45    1.56
  -8  -4  -2   12.97    1.22
   8   4   2    9.90    0.83
  -8   4  -2   11.77    1.18
   8   4   2   10.39    0.84
  -8   4  -2   11.18    1.34
   8   4   2   10.45    1.58
   8   4   2   10.29    1.00
   9  -4   2    1.35    0.60
   9   4   2    1.41    0.39
  -9   4  -2    0.98    0.55
   9   4   2    1.66    0.55
   9   4   2    0.74    0.37
  -9   4  -2    1.43    0.60
   9   4   2    0.98    0.80
  10  -4   2   16.94    1.14
  10   4   2   17.92    1.00
  10   4   2   14.85    0.86
  10   4   2   15.95    1.07
 -10   4  -2   16.91    1.21
   9   5  -2    9.13    0.73
  -9   5   2    9.47    0.65
  -9   5   2    9.34    0.69
   9   5  -2    8.26    0.70
   8  -5  -2    0.87    0.62
  -8   5   2    0.50    0.52
   8   5  -2    0.54    0.33
   8   5  -2    0.40    0.40
  -8   5   2    0.41    0.28
  -8   5   2    0.33    0.27
  -7  -5   2    8.87    1.09
   7  -5  -2    9.13    1.30
   7   5  -2    7.64    0.85
  -7   5   2    8.49    1.07
  -7   5   2    8.15    0.70
  -7   5   2    8.28    0.94
  -7   5   2    7.75    0.73
  -7   5   2    8.19    1.07
   7   5  -2    7.98    0.77
  -6  -5   2    9.65    1.12
   6  -5  -2   10.26    1.47
   6  -5  -2   10.46    1.55
   6   5  -2   10.04    0.96
  -6   5   2   12.76    1.44
  -6   5   2   11.82    0.87
   6   5  -2   11.34    0.90
  -6   5   2   10.82    1.12
  -6   5   2   10.25    1.04
  -6   5   2   11.52    2.00
  -6   5   2   11.16    0.82
  -6   5   2   11.55    1.10
   5  -5  -2   30.55    2.44
  -5  -5   2   33.81    2.09
   5  -5  -2   31.74    2.36
  -5   5   2   35.55    3.25
  -5   5   2   35.80    1.93
   5   5  -2   34.79    1.70
  -5   5   2   35.81    1.69
  -5   5   2   33.28    1.56
   5   5  -2   34.29    1.80
  -5   5   2   33.07    1.96
  -5   5   2   34.17    1.95
   4  -5  -2   14.10    1.41
  -4  -5   2   13.26    1.29
  -4   5   2   13.88    0.81
  -4   5   2   14.99    0.85
  -4   5   2   15.63    2.12
   4   5  -2   15.16    1.03
   4   5  -2   13.44    1.10
  -4   5   2   15.82    1.19
  -4   5   2   15.25    1.16
  -4   5   2   15.10    1.13
  -3  -5   2   31.94    2.11
   3  -5  -2   34.25    2.24
   3  -5  -2   32.44    2.24
  -3  -5   2   34.78    2.09
  -3   5   2   37.14    1.79
  -3   5   2   32.75    1.80
  -3   5   2   32.30    3.10
   3   5  -2   33.75    1.70
  -3   5   2   33.50    1.80
  -3   5   2   33.06    2.06
   3   5  -2   31.32    1.75
   3   5  -2   35.33    3.06
   2  -5  -2    8.70    1.10
  -2  -5   2    8.74    1.09
   2  -5  -2    7.40    1.03
  -2  -5   2    8.30    1.11
  -2   5   2    9.30    0.81
   2   5  -2    7.19    1.52
   2   5  -2    9.84    0.92
  -2   5   2    9.16    1.65
   2   5  -2    9.95    0.89
  -2   5   2    9.31    0.78
  -2   5   2    9.03    0.91
   2   5  -2    9.80    0.88
  -2   5   2   10.30    0.86
   1  -5  -2   19.10    1.49
  -1  -5   2   18.72    1.54
   1  -5  -2   18.57    1.36
  -1  -5   2   17.28    1.53
   1   5  -2   15.65    1.22
   1   5  -2   15.92    1.32
  -1   5   2   16.92    2.11
  -1   5   2   16.30    1.02
   1   5  -2   15.57    1.15
   1   5  -2   15.63    2.04
  -1   5   2   17.84    1.12
   1   5  -2   17.28    1.20
  -1   5   2   15.00    1.15
   0  -5   2   25.28    1.80
   0  -5   2   21.95    2.08
   0  -5  -2   23.67    1.52
   0  -5   2   23.30    1.86
   0   5   2   21.44    2.44
   0   5  -2   24.72    1.49
   0   5   2   21.93    1.35
   0   5  -2   21.56    1.58
   0   5  -2   23.19    2.41
   0   5   2   22.13    1.26
   0   5  -2   22.77    1.51
   0   5  -2   23.79    1.41
   0   5   2   25.04    1.20
   1  -5   2   25.19    1.89
   1  -5   2   24.21    1.93
   1  -5   2   19.66    2.20
  -1   5  -2   24.79    1.31
   1   5   2   25.76    2.55
   1   5   2   24.08    1.13
  -1   5  -2   25.98    1.72
  -1   5  -2   23.19    1.46
   1   5   2   23.58    1.30
  -1   5  -2   26.69    2.57
  -1   5  -2   23.89    1.24
  -1   5  -2   23.30    1.60
  -1   5  -2   23.86    1.52
   2  -5   2    8.38    1.32
   2  -5   2    7.57    1.34
  -2   5  -2    6.39    0.71
  -2   5  -2    8.03    0.85
  -2   5  -2    6.27    1.03
  -2   5  -2    7.32    0.97
  -2   5  -2    7.08    1.65
  -2   5  -2    6.10    0.73
   2   5   2    5.89    1.49
   2   5   2    5.09    0.55
  -2   5  -2    6.48    0.94
   3  -5   2    8.00    1.35
   3  -5   2    7.07    1.35
   3  -5   2    5.98    1.24
  -3   5  -2    7.84    1.04
  -3   5  -2    6.59    1.18
  -3   5  -2    6.28    0.95
  -3   5  -2    6.34    1.50
  -3   5  -2    6.26    0.87
  -3   5  -2    5.82    0.75
  -3   5  -2    5.89    0.71
   4  -5   2   15.14    1.81
   4  -5   2   16.29    1.68
  -4   5  -2   16.08    2.12
  -4   5  -2   17.37    1.37
  -4   5  -2   16.49    1.34
  -4   5  -2   14.74    1.59
  -4   5  -2   17.09    1.13
  -4   5  -2   15.61    1.19
  -4   5  -2   16.02    1.45
   5  -5   2   31.41    2.33
   5  -5   2   33.85    2.47
  -5   5  -2   32.74    1.87
  -5   5  -2   33.50    2.02
  -5   5  -2   30.37    2.05
  -5   5  -2   31.49    1.74
  -5   5  -2   32.28    2.15
  -5   5  -2   32.41    3.09
  -5   5  -2   31.87    2.02
   6  -5   2    8.20    1.20
  -6   5  -2    5.97    0.94
   6   5   2    5.21    1.32
  -6   5  -2    7.45    0.88
  -6   5  -2    7.91    1.01
   6   5   2    6.19    0.71
  -6   5  -2    8.22    0.81
   7  -5   2   18.71    1.57
  -7   5  -2   20.04    1.58
  -7   5  -2   18.35    1.35
   7   5   2   12.51    1.79
  -7   5  -2   18.91    1.24
   7   5   2   20.70    1.10
  -7   5  -2   19.99    1.35
   8   5   2    5.85    0.64
  -8   5  -2    7.98    0.95
  -8   5  -2    5.94    0.73
  -8   5  -2    6.27    0.69
   9  -5   2    7.58    0.84
  -9   5  -2    7.44    0.73
  -9   5  -2    7.78    0.89
  -9   5  -2    8.54    0.67
   9   5   2    7.79    0.63
   7  -6  -2    1.30    0.53
   7   6  -2    1.58    0.43
  -7   6   2    1.37    0.49
   6  -6  -2    8.16    1.13
  -6   6   2   11.22    0.90
  -6   6   2   11.00    1.05
  -6   6   2    9.27    1.67
  -6   6   2    9.15    0.97
   6   6  -2   11.67    0.94
   5  -6  -2    1.29    0.70
  -5   6   2    1.22    0.48
   5   6  -2    1.85    0.37
  -5   6   2    2.25    0.69
  -5   6   2    1.41    1.04
   5   6  -2    1.21    0.48
  -5   6   2    1.86    0.44
  -4   6   2    0.67    0.40
  -4   6   2    0.49    0.35
  -4   6   2   -0.07    0.81
   4   6  -2    0.80    0.34
   4   6  -2    1.09    0.45
   3  -6  -2   24.83    1.82
   3   6  -2   22.94    1.39
  -3   6   2   22.47    2.43
  -3   6   2   21.11    1.34
   3   6  -2   22.66    1.21
   3   6  -2   20.43    2.28
  -3   6   2   22.06    1.26
  -2  -6   2    7.01    1.17
  -2  -6   2    6.22    1.39
   2  -6  -2    7.83    1.01
   2   6  -2    8.74    1.55
  -2   6   2    8.78    0.72
  -2   6   2    8.30    0.79
   2   6  -2    7.31    0.87
  -2   6   2    9.82    1.80
   2   6  -2    8.41    0.76
  -1  -6   2    3.11    0.96
   1  -6  -2    3.81    0.84
  -1   6   2    2.68    1.12
  -1   6   2    3.47    0.52
   1   6  -2    3.31    0.63
   1   6  -2    2.81    0.51
   1   6  -2    2.94    1.05
  -1   6   2    2.97    0.45
   0  -6   2   16.35    1.64
   0  -6  -2   16.56    1.39
   0   6   2   14.92    0.84
   0   6  -2   14.22    1.92
   0   6  -2   13.93    1.17
   0   6  -2   15.10    1.07
   0   6   2   15.02    1.00
   0   6   2   15.98    2.03
   1  -6   2    6.65    1.19
  -1   6  -2    8.05    0.83
  -1   6  -2    8.89    0.68
  -1   6  -2    7.40    0.90
  -1   6  -2    8.30    1.52
   1   6   2    8.12    0.71
   1   6   2    9.46    1.66
   2  -6   2   18.94    1.86
   2  -6   2   16.16    1.64
  -2   6  -2   16.58    1.09
  -2   6  -2   16.31    2.04
   2   6   2   16.48    0.95
  -2   6  -2   18.01    1.21
  -2   6  -2   14.92    1.23
   3  -6   2    3.86    0.99
  -3   6  -2    3.17    0.79
  -3   6  -2    3.06    0.59
  -3   6  -2    4.16    1.20
  -3   6  -2    3.80    0.59
  -3   6  -2    3.44    0.68
   4  -6   2   16.05    1.55
  -4   6  -2   15.81    1.38
  -4   6  -2   17.38    1.25
  -4   6  -2   17.73    1.19
  -4   6  -2   16.27    1.27
  -4   6  -2   16.89    2.11
   5  -6   2    0.44    0.54
  -5   6  -2   -0.28    0.42
  -5   6  -2    0.18    0.42
  -5   6  -2    0.30    0.31
   6  -6   2    8.29    1.01
  -6   6  -2    8.14    0.84
  -6   6  -2    8.33    0.77
  -2   7   2    8.28    0.66
   2   7  -2    7.29    0.66
  -1   7   2    7.90    0.62
   1   7  -2    6.96    0.69
   0  -7   2    0.40    0.67
   0   7  -2    0.30    0.31
   0   7   2    0.06    0.24
   1  -7   2    3.17    0.76
  -1   7  -2    1.72    0.43
  -1   7  -2    2.39    0.56
   2  -7   2    2.76    0.63
  13   0  -3    5.82    0.67
  13   0  -3    5.41    0.73
  13   0  -3    7.56    0.88
 -13   0   3    5.25    0.69
  12   0  -3    0.63    0.55
  12   0  -3    1.19    0.56
  12   0  -3    0.67    0.52
 -12   0   3    2.12    0.63
  11   0  -3    0.65    0.42
  11   0  -3    0.52    0.60
 -11   0   3    0.39    0.55
  11   0  -3    0.79    0.60
  11   0  -3    0.16    0.63
  10   0  -3   30.18    1.66
  10   0  -3   31.73    1.77
  10   0  -3   34.57    2.29
 -10   0   3   31.08    2.00
  -9   0   3   16.86    1.55
   9   0  -3   16.41    1.91
   9   0  -3   18.36    1.32
  -8   0   3   48.94    3.27
   8   0  -3   49.93    2.21
   8   0  -3   53.05    3.93
   7   0  -3   -0.32    0.77
  -7   0   3    0.05    0.54
   6   0  -3  122.26    5.96
  -6   0   3  124.78    6.34
  -6   0   3  125.06    5.13
   6   0  -3  124.59    5.87
  -6   0   3  123.88    5.73
   6   0  -3  131.52    7.06
  -5   0   3   50.88    2.33
   5   0  -3   55.05    2.77
   5   0  -3   52.53    2.70
  -5   0   3   51.28    2.97
  -5   0   3   54.02    3.19
   5   0  -3   52.29    3.34
  -4   0   3    5.20    0.50
   4   0  -3    6.18    0.64
  -4   0   3    6.48    0.80
  -4   0   3    6.15    0.72
   4   0  -3    5.43    0.57
   4   0  -3    5.55    0.88
  -4   0   3    5.98    0.68
   4   0  -3    5.25    0.75
   3   0  -3   25.18    1.40
  -3   0   3   22.31    1.33
   3   0  -3   25.03    1.69
  -3   0   3   26.04    1.20
  -3   0   3   25.28    1.59
   3   0  -3   28.65    1.70
  -3   0   3   22.32    1.52
   3   0  -3   23.33    1.53
  -3   0   3   23.09    1.29
  -3   0   3   26.71    1.44
   3   0  -3   26.93    1.42
  -3   0   3   25.40    1.47
  -2   0   3   12.41    0.91
  -2   0   3   10.76    0.89
   2   0  -3   11.86    0.80
  -2   0   3   11.23    0.79
   2   0  -3   13.84    1.06
   2   0  -3   10.23    0.94
  -2   0   3   12.45    0.81
   2   0  -3   11.93    0.92
   2   0  -3   11.41    0.91
  -2   0   3   11.41    0.81
  -2   0   3   12.52    0.67
   2   0  -3   12.45    0.79
   1   0  -3   28.42    1.57
  -1   0   3   30.78    1.60
  -1   0   3   27.86    1.55
   1   0  -3   27.25    1.53
   1   0  -3   29.57    1.53
  -1   0   3   30.19    1.49
  -1   0   3   29.29    1.29
   1   0  -3   27.54    1.47
   1   0  -3   28.40    1.68
  -1   0   3   28.98    1.68
   1   0  -3   30.72    1.75
   0   0  -3   22.03    1.26
   0   0  -3   23.10    1.23
   0   0  -3   21.46    1.39
   0   0   3   23.60    1.23
   0   0   3   25.06    1.28
   0   0  -3   22.87    1.39
   0   0   3   22.89    1.22
   0   0  -3   22.40    1.23
  -1   0  -3    0.63    0.28
  -1   0  -3    0.35    0.27
  -1   0  -3    0.33    0.25
  -1   0  -3    0.30    0.25
   1   0   3    0.20    0.25
   1   0   3    0.81    0.27
  -1   0  -3    0.50    0.35
  -2   0  -3   72.36    3.29
   2   0   3   75.40    3.80
  -2   0  -3   75.61    3.87
  -2   0  -3   70.28    2.90
  -2   0  -3   70.46    3.51
  -2   0  -3   69.74    3.26
  -2   0  -3   71.51    3.72
  -3   0  -3   32.51    1.73
  -3   0  -3   33.40    1.54
  -3   0  -3   34.68    2.15
  -3   0  -3   32.95    1.90
   3   0   3   37.97    2.19
  -3   0  -3   33.48    1.96
   4   0   3  126.16    6.52
  -4   0  -3  117.84    6.19
  -4   0  -3  120.58    4.87
  -4   0  -3  120.94    6.46
  -4   0  -3  120.32    5.91
  -4   0  -3  124.55    5.45
  -5   0  -3  109.86    6.32
  -5   0  -3  118.98    4.76
  -5   0  -3  117.93    5.28
  -5   0  -3  108.75    5.76
  -5   0  -3  120.59    6.03
   5   0   3  117.57    6.43
  -6   0  -3   21.21    1.28
   6   0   3   20.69    1.61
   6   0   3   22.24    2.03
   6   0   3   19.07    1.48
  -6   0  -3   20.52    1.56
  -7   0  -3    0.48    0.42
   7   0   3    0.88    0.51
   7   0   3    1.66    0.71
   8   0   3   28.56    1.59
  -8   0  -3   29.71    1.84
   8   0   3   31.94    2.16
   9   0   3   29.47    2.13
   9   0   3   26.96    2.16
   9   0   3   26.23    1.72
  -9   0  -3   24.24    1.80
  -9   0  -3   29.10    2.12
   9   0   3   28.15    1.90
  10   0   3    3.10    0.89
  10   0   3    1.76    0.82
  10   0   3    1.43    0.56
  10   0   3    2.96    0.70
  11   0   3    3.11    0.85
  11   0   3    3.63    0.92
  11   0   3    3.72    0.74
  11   0   3    2.70    0.51
  11   0   3    2.04    0.53
  12   0   3    5.90    0.66
  12   0   3    5.43    0.67
  12   0   3    5.69    0.80
 -12   0  -3    5.20    0.78
  12   0   3    5.09    0.62
  13  -1  -3   20.69    1.45
  13  -1  -3   21.02    1.40
  13  -1  -3   20.75    1.35
  13   1  -3   20.60    1.49
 -13   1   3   20.67    1.12
  13   1  -3   20.23    1.21
  13   1  -3   18.70    1.16
  12  -1  -3    8.57    1.09
 -12  -1   3   11.09    1.00
  12   1  -3   10.36    1.23
 -12   1   3    8.21    0.89
  12   1  -3    8.45    1.02
  12   1  -3    5.51    0.76
  12   1  -3    7.02    0.84
  12   1  -3    9.74    0.83
  11  -1  -3   20.83    1.82
 -11  -1   3   22.40    1.60
  11  -1  -3   21.60    1.41
  11   1  -3   21.13    1.78
  11   1  -3   22.11    1.59
  11   1  -3   22.20    1.37
  11   1  -3   20.72    1.48
 -11   1   3   19.98    1.45
  11   1  -3   20.54    1.61
  10  -1  -3    7.05    1.01
 -10  -1   3    5.59    0.96
  10   1  -3    5.24    0.91
  10   1  -3    4.29    0.76
  10   1  -3    5.73    0.91
  10   1  -3    3.59    0.73
 -10   1   3    3.66    0.75
  10   1  -3    2.34    0.88
  -9  -1   3    9.25    1.30
  -9  -1   3    8.79    1.25
   9  -1  -3    9.04    1.12
  -9   1   3    9.03    1.16
   9   1  -3    8.54    1.13
   9   1  -3    9.28    1.13
   9   1  -3    7.94    1.11
   9   1  -3    9.89    1.11
   9   1  -3    9.82    1.00
  -8  -1   3   37.46    2.18
   8  -1  -3   34.46    3.17
   8   1  -3   35.53    1.77
   8   1  -3   32.46    2.17
   8   1  -3   31.86    2.98
   7  -1  -3    7.23    0.83
   7  -1  -3    9.69    1.74
  -7  -1   3    8.92    0.92
  -7   1   3    4.58    0.95
   7   1  -3    4.73    1.24
   7   1  -3    6.03    0.89
   7   1  -3    6.79    1.00
   6  -1  -3    7.27    1.21
   6  -1  -3    9.04    0.88
   6  -1  -3    9.03    1.34
  -6  -1   3    7.77    0.87
  -6   1   3   11.07    0.91
  -6   1   3    9.81    1.03
   6   1  -3   12.37    1.44
   6   1  -3   11.37    1.02
   5  -1  -3   29.52    1.78
  -5  -1   3   27.88    1.97
  -5  -1   3   28.31    1.64
   5  -1  -3   29.52    1.89
   5  -1  -3   30.56    2.34
   5  -1  -3   28.40    1.91
   5  -1  -3   28.09    2.15
  -5  -1   3   29.58    2.02
  -5   1   3   28.92    2.07
  -5   1   3   32.78    1.85
  -5   1   3   24.38    1.78
   5   1  -3   29.69    1.75
   5   1  -3   32.71    2.29
  -5   1   3   31.53    1.74
  -5   1   3   30.91    1.60
  -4  -1   3   44.57    1.90
  -4  -1   3   45.17    2.68
   4  -1  -3   45.63    2.93
   4  -1  -3   47.57    2.81
  -4  -1   3   41.58    2.25
  -4  -1   3   44.21    2.66
   4  -1  -3   43.89    2.40
   4  -1  -3   44.51    2.45
  -4   1   3   49.72    2.82
  -4   1   3   48.66    2.16
  -4   1   3   48.62    2.40
   4   1  -3   49.77    2.93
   4   1  -3   47.81    2.37
   3  -1  -3  231.04   11.61
   3  -1  -3  240.24   10.80
   3  -1  -3  233.88   10.12
  -3  -1   3  232.81   11.50
   3  -1  -3  240.74   10.04
  -3  -1   3  242.69   11.04
  -3  -1   3  222.64    8.78
   3   1  -3  239.31   11.76
  -3   1   3  232.48    9.96
  -3   1   3  237.73    9.06
  -3   1   3  233.91   11.65
   3   1  -3  238.11    9.99
  -3   1   3  223.71   10.70
  -3   1   3  242.77    9.37
  -2  -1   3   61.82    3.01
   2  -1  -3   60.46    2.67
   2  -1  -3   60.93    2.33
  -2  -1   3   63.49    3.06
   2  -1  -3   63.30    3.05
  -2  -1   3   65.53    3.01
  -2  -1   3   60.97    2.64
   2  -1  -3   60.87    2.68
   2  -1  -3   63.17    2.84
  -2  -1   3   62.44    2.79
   2   1  -3   55.08    3.19
   2   1  -3   51.39    2.80
  -2   1   3   53.67    2.45
   2   1  -3   49.51    2.72
   2   1  -3   48.17    2.96
   2   1  -3   54.63    2.71
  -2   1   3   52.99    2.64
  -2   1   3   52.97    3.15
  -2   1   3   52.81    2.47
  -1  -1   3   47.48    2.27
  -1  -1   3   47.40    2.23
   1  -1  -3   43.23    1.93
  -1  -1   3   45.30    2.02
  -1  -1   3   47.08    2.29
  -1  -1   3   46.06    2.14
   1  -1  -3   44.90    2.09
   1   1  -3   39.79    2.10
   1   1  -3   40.28    2.09
  -1   1   3   40.05    1.97
  -1   1   3   38.55    1.97
   1   1  -3   39.38    2.19
   1   1  -3   40.34    2.39
  -1   1   3   40.56    1.87
   1   1  -3   39.15    1.66
  -1   1   3   42.50    2.44
  -1   1   3   40.89    1.83
   0  -1   3   22.88    1.18
   0  -1   3   24.80    1.30
   0  -1   3   23.23    1.25
   0  -1   3   23.51    1.32
   0   1  -3   19.39    1.18
   0   1  -3   20.34    1.19
   0   1  -3   21.11    1.24
   0   1   3   20.05    1.42
   0   1   3   20.74    1.06
   0   1  -3   20.49    1.35
   0   1   3   20.17    1.10
   0   1  -3   20.54    1.22
   0   1   3   20.22    0.94
   0   1   3   18.99    1.06
   1  -1   3  212.72    9.61
   1  -1   3  220.30   10.31
   1  -1   3  218.82   11.01
   1   1   3  219.24    9.34
   1   1   3  218.35   10.86
  -1   1  -3  228.47    9.56
   1   1   3  230.48    9.32
  -1   1  -3  221.13    8.91
   1   1   3  218.11    8.67
  -1   1  -3  235.78   10.95
  -1   1  -3  232.98   10.32
  -1   1  -3  238.25   10.90
   2  -1   3  115.69    5.59
   2  -1   3  114.62    5.96
   2  -1   3  110.84    5.25
  -2   1  -3  123.82    5.96
  -2   1  -3  119.70    5.28
   2   1   3  114.29    5.04
  -2   1  -3  124.75    5.92
  -2   1  -3  111.82    5.18
   2   1   3  110.88    5.89
  -2   1  -3  124.02    4.70
  -2   1  -3  120.73    4.97
  -2   1  -3  122.76    5.65
  -3  -1  -3   48.29    2.29
  -3  -1  -3   52.81    3.04
   3  -1   3   52.17    2.79
   3  -1   3   51.68    2.63
  -3   1  -3   45.56    2.42
  -3   1  -3   49.37    2.70
  -3   1  -3   49.88    2.23
  -3   1  -3   50.89    2.75
  -3   1  -3   51.93    2.88
   3   1   3   50.88    2.85
  -3   1  -3   48.26    2.56
   4  -1   3    9.66    0.87
  -4  -1  -3   10.13    0.75
  -4  -1  -3    8.75    1.08
   4   1   3   13.37    1.15
  -4   1  -3   12.46    1.05
  -4   1  -3   13.66    1.01
  -4   1  -3   12.39    0.86
  -4   1  -3   13.96    1.16
  -5  -1  -3   16.50    1.08
   5  -1   3   16.25    1.13
   5  -1   3   18.86    1.77
  -5  -1  -3   16.20    1.24
  -5   1  -3   17.89    1.53
  -5   1  -3   15.44    1.09
   5   1   3   15.43    1.50
  -5   1  -3   17.27    1.35
  -5   1  -3   16.30    1.29
   5   1   3   16.70    1.14
   6  -1   3   22.94    1.76
  -6  -1  -3   24.81    1.52
  -6  -1  -3   25.24    1.76
   6  -1   3   24.24    2.31
   6   1   3   24.60    1.59
   6   1   3   26.30    1.79
  -6   1  -3   23.55    1.48
  -6   1  -3   22.92    1.78
  -7  -1  -3   32.28    1.71
   7  -1   3   31.03    2.17
   7  -1   3   33.18    2.85
   7   1   3   32.19    2.11
  -7   1  -3   26.43    2.14
   7   1   3   29.55    1.93
   7   1   3   28.83    1.57
   7   1   3   29.51    1.53
   8  -1   3   33.07    2.36
  -8  -1  -3   34.00    2.01
   8   1   3   39.90    2.48
   8   1   3   37.86    1.80
   8   1   3   36.52    1.89
   8   1   3   38.92    1.93
   9  -1   3    3.87    0.97
   9  -1   3    2.88    0.57
  -9  -1  -3    2.48    0.80
  -9  -1  -3    3.06    0.78
   9  -1   3    3.11    0.91
   9   1   3    3.84    0.98
   9   1   3    4.46    0.78
   9   1   3    2.68    0.60
   9   1   3    3.48    0.59
   9   1   3    3.38    0.79
   9   1   3    3.25    0.66
   9   1   3    4.07    0.68
  10  -1   3   17.93    1.48
 -10  -1  -3   20.07    1.76
  10  -1   3   19.20    1.65
  10  -1   3   18.26    1.70
  10   1   3   16.36    1.29
  10   1   3   17.12    1.28
  10   1   3   17.33    1.73
  10   1   3   18.24    1.23
  10   1   3   17.65    1.35
  10   1   3   17.62    1.52
  10   1   3   17.34    1.25
  11  -1   3   19.39    1.48
  11  -1   3   21.07    1.76
  11  -1   3   18.25    1.48
 -11   1  -3   22.97    1.59
  11   1   3   22.29    1.25
  11   1   3   22.67    1.80
  11   1   3   20.73    1.20
  11   1   3   21.27    1.42
  11   1   3   20.18    1.29
  11   1   3   21.17    1.46
  11   1   3   21.28    1.54
  12  -1   3    8.60    1.12
  12  -1   3    9.87    0.77
  12  -1   3   10.08    0.93
 -12  -1  -3    8.51    1.01
  12  -1   3    8.99    0.97
  12   1   3    9.69    0.88
 -12   1  -3    7.81    0.95
  12   1   3    9.62    0.82
  12   1   3   10.51    0.99
  12  -2  -3   11.73    0.80
 -12  -2   3   12.44    1.05
  12  -2  -3   11.48    1.32
  12   2  -3   11.55    0.87
  12   2  -3   11.64    0.91
 -12   2   3   12.60    0.77
  12   2  -3   10.47    0.84
  12   2  -3   13.62    1.19
  11  -2  -3   14.95    1.28
 -11  -2   3   15.13    1.35
  11   2  -3   15.92    1.31
 -11   2   3   15.98    1.05
  11   2  -3   13.66    1.14
  11   2  -3   14.96    1.19
  11   2  -3   14.04    1.19
  11   2  -3   13.37    1.45
 -10  -2   3    3.75    0.92
 -10  -2   3    4.08    1.01
  10  -2  -3    3.97    0.84
  10   2  -3    2.76    0.71
  10   2  -3    4.08    0.75
  10   2  -3    3.77    0.56
  10   2  -3    5.42    0.81
 -10   2   3    4.10    0.60
  10   2  -3    3.40    0.68
  10   2  -3    3.61    0.85
  10   2  -3    4.75    1.08
  10   2  -3    3.77    0.76
  -9  -2   3    7.21    1.13
   9  -2  -3    6.43    1.14
  -9  -2   3    9.65    1.39
   9   2  -3    8.78    0.99
   9   2  -3    7.86    1.21
   9   2  -3    9.74    1.25
  -9   2   3    8.04    0.95
   9   2  -3    8.51    1.04
   9   2  -3    9.92    1.14
   9   2  -3   11.01    1.08
   9   2  -3    8.77    0.96
   9   2  -3   10.28    1.02
   9   2  -3   10.78    1.19
  -8  -2   3   65.80    3.31
   8   2  -3   60.67    2.99
   8   2  -3   59.02    2.76
   8   2  -3   59.73    3.13
   8   2  -3   64.08    3.39
   8   2  -3   62.92    2.75
   8   2  -3   61.71    2.81
   8   2  -3   60.43    2.58
  -8   2   3   52.07    3.14
  -7  -2   3   35.25    2.05
   7  -2  -3   31.59    3.04
   7  -2  -3   32.24    2.31
   7   2  -3   31.60    2.17
   7   2  -3   35.95    1.82
   7   2  -3   35.29    1.70
   7   2  -3   36.84    3.09
   7   2  -3   36.28    2.24
   6  -2  -3   52.21    3.14
  -6  -2   3   55.34    2.86
   6  -2  -3   57.81    3.25
   6  -2  -3   55.57    3.17
   6  -2  -3   55.90    3.95
   6  -2  -3   55.87    3.67
  -6   2   3   54.93    3.13
   6   2  -3   56.45    2.97
   6   2  -3   63.91    4.08
   6   2  -3   52.35    2.97
  -5  -2   3   43.67    2.31
   5  -2  -3   47.85    2.64
   5  -2  -3   48.75    2.60
   5  -2  -3   49.09    2.97
   5  -2  -3   45.53    2.59
  -5   2   3   43.28    2.39
  -5   2   3   41.13    2.47
   5   2  -3   42.49    2.44
  -5   2   3   42.64    2.29
   5   2  -3   46.07    3.23
   4  -2  -3   61.34    3.16
   4  -2  -3   63.05    3.13
   4  -2  -3   62.99    3.34
   4  -2  -3   64.31    3.59
  -4  -2   3   59.96    2.96
  -4   2   3   57.77    2.84
   4   2  -3   65.58    3.94
  -4   2   3   61.87    2.92
  -4   2   3   62.29    3.09
   4   2  -3   63.39    3.11
  -4   2   3   61.71    3.70
   3  -2  -3   67.29    3.26
  -3  -2   3   66.47    3.16
   3  -2  -3   67.44    3.24
   3  -2  -3   68.61    3.70
  -3   2   3   71.33    3.92
   3   2  -3   71.39    3.33
   3   2  -3   71.05    4.09
  -3   2   3   65.12    3.19
  -3   2   3   67.93    3.03
  -3   2   3   64.42    3.01
  -2  -2   3   90.83    4.08
   2  -2  -3   89.63    4.08
  -2  -2   3   85.71    4.12
   2  -2  -3   90.32    3.58
  -2   2   3   92.34    3.82
  -2   2   3   93.95    4.98
   2   2  -3   95.92    5.11
  -2   2   3   92.38    3.86
   2   2  -3   95.83    4.27
  -2   2   3   89.43    4.05
  -1  -2   3   22.89    1.44
   1  -2  -3   22.23    1.07
  -1  -2   3   23.44    1.27
  -1  -2   3   21.89    1.41
  -1   2   3   23.01    1.28
  -1   2   3   24.08    1.68
  -1   2   3   23.05    1.22
  -1   2   3   22.56    1.09
   1   2  -3   24.47    1.44
  -1   2   3   23.29    1.19
   1   2  -3   25.28    1.76
   0  -2   3    3.60    0.51
   0  -2   3    3.22    0.56
   0  -2   3    3.76    0.53
   0   2   3    1.75    0.42
   0   2   3    1.95    0.25
   0   2  -3    1.73    0.47
   0   2  -3    2.40    0.65
   0   2  -3    1.81    0.25
   0   2   3    1.71    0.26
   1  -2   3    0.28    0.42
   1  -2   3    0.08    0.29
   1  -2   3    0.49    0.34
   1  -2   3    0.42    0.40
  -1   2  -3    1.12    0.40
   1   2   3    0.38    0.30
   1   2   3    0.81    0.46
   2  -2   3   28.10    1.63
   2  -2   3   24.89    1.67
   2  -2   3   25.62    1.64
   2  -2   3   25.41    1.81
  -2   2  -3   29.46    1.53
   2   2   3   27.39    1.83
  -2   2  -3   28.49    1.53
  -2   2  -3   28.46    1.69
   3  -2   3   63.80    3.25
   3  -2   3   63.83    3.64
   3  -2   3   61.67    3.25
  -3  -2  -3   63.94    3.82
   3  -2   3   62.77    3.40
  -3   2  -3   64.02    3.28
   3   2   3   63.05    2.81
  -3   2  -3   65.95    3.28
  -3   2  -3   63.95    3.04
   3   2   3   66.71    2.78
   3   2   3   63.56    3.67
  -4  -2  -3   32.57    1.63
   4  -2   3   36.68    2.16
   4  -2   3   36.79    2.34
   4   2   3   33.98    2.40
   4   2   3   33.91    1.69
  -4   2  -3   37.82    2.10
   5  -2   3   17.45    1.60
   5  -2   3   15.14    1.28
   5  -2   3   13.90    1.45
  -5  -2  -3   15.94    1.03
   5   2   3   16.97    1.05
  -5   2  -3   16.84    1.30
   5   2   3   16.00    1.43
   6  -2   3   77.93    3.93
  -6  -2  -3   78.58    3.60
   6  -2   3   74.58    4.00
   6   2   3   73.81    2.95
   6   2   3   73.50    3.83
  -6   2  -3   77.14    4.04
   6   2   3   73.50    2.85
   6   2   3   67.85    3.53
   7  -2   3   18.17    1.72
   7  -2   3   15.95    2.30
   7   2   3   21.54    1.22
   7   2   3   20.85    1.76
   7   2   3   18.99    1.14
   7   2   3   16.06    1.15
   7   2   3   20.71    1.29
   8  -2   3   11.95    1.27
   8  -2   3   10.45    1.43
  -8  -2  -3   11.19    1.04
   8   2   3   12.06    1.63
   8   2   3    9.67    0.86
   8   2   3    8.83    0.83
  -8   2  -3   10.26    1.25
   8   2   3   11.09    0.94
   8   2   3   13.04    1.20
   8   2   3   10.63    1.01
   9  -2   3    2.97    0.91
  -9  -2  -3    1.34    0.60
  -9  -2  -3    2.46    0.77
   9  -2   3    2.73    0.63
   9   2   3    2.57    0.54
   9   2   3    2.42    0.86
   9   2   3    2.61    0.62
  -9   2  -3    2.03    0.64
   9   2   3    3.11    0.44
   9   2   3    1.66    0.62
   9   2   3    2.75    0.59
 -10  -2  -3    9.60    1.34
  10  -2   3    9.98    1.28
  10  -2   3    9.60    0.84
  10   2   3    6.16    0.82
  10   2   3    7.65    0.85
  10   2   3    6.02    0.82
  10   2   3    5.31    1.13
 -10   2  -3    6.58    0.89
  10   2   3    6.57    0.79
  11  -2   3   14.45    1.35
  11   2   3   14.58    1.06
  11   2   3   15.44    1.00
  11   2   3   16.26    1.12
  11   2   3   16.61    1.53
  11   2   3   16.13    1.11
 -11   2  -3   15.81    1.17
 -12  -2  -3    5.45    0.76
  12  -2   3    4.59    0.82
  12  -2   3    4.77    0.71
  12  -2   3    5.93    0.70
  12   2   3    4.56    0.58
 -12   2  -3    5.17    0.56
  12   2   3    5.15    0.62
  12   2   3    3.51    0.58
  12  -3  -3    1.51    0.38
 -12  -3   3    1.81    0.48
  12   3  -3    1.39    0.40
  11  -3  -3   15.92    1.26
 -11  -3   3   15.57    1.30
  11   3  -3   14.96    1.11
  11   3  -3   17.18    1.18
  11   3  -3   18.12    1.31
  11   3  -3   13.66    1.48
  11   3  -3   15.25    1.15
 -10  -3   3   11.98    1.40
 -10  -3   3   10.58    1.42
  10  -3  -3   12.66    1.33
  10   3  -3   12.79    1.26
  10   3  -3   13.85    1.12
  10   3  -3   14.11    1.07
  10   3  -3   13.06    1.23
  10   3  -3   14.70    1.51
  10   3  -3   12.92    0.87
  -9  -3   3    2.07    0.96
  -9  -3   3    2.34    0.81
   9   3  -3    1.31    0.71
   9   3  -3    1.89    0.71
   9   3  -3    2.00    0.55
   9   3  -3    2.42    0.58
   9   3  -3    1.92    0.58
  -9   3   3    2.13    0.74
   9   3  -3    1.88    0.51
   8  -3  -3    8.69    1.34
  -8  -3   3   10.55    1.19
  -8   3   3    7.74    1.09
   8   3  -3   12.22    1.33
   8   3  -3   10.77    0.99
   8   3  -3    9.64    1.11
  -8   3   3   11.36    1.37
   8   3  -3   11.71    0.98
   8   3  -3    8.79    1.16
   8   3  -3   10.34    1.04
  -8   3   3   10.57    1.26
   8   3  -3   10.00    1.33
   7  -3  -3   13.06    1.61
  -7  -3   3   13.08    1.25
   7  -3  -3   12.77    1.63
   7   3  -3   12.35    1.02
   7   3  -3   12.83    1.38
  -7   3   3   13.70    1.44
   7   3  -3   13.29    1.02
  -7   3   3   12.72    1.19
   7   3  -3   13.55    1.36
   7   3  -3   14.35    1.29
   7   3  -3   13.54    1.13
  -7   3   3   13.70    1.32
   6  -3  -3   15.95    1.49
   6  -3  -3   14.15    1.52
  -6  -3   3   15.84    1.22
   6   3  -3   12.50    1.00
  -6   3   3   13.07    1.29
  -6   3   3   12.28    1.36
   6   3  -3   12.34    0.98
  -6   3   3   13.90    2.08
   6   3  -3   13.55    1.10
   6   3  -3   12.27    1.98
   6   3  -3   11.66    1.32
  -6   3   3   12.94    1.35
   6   3  -3   14.44    1.41
  -6   3   3   12.79    1.24
   5  -3  -3   13.04    1.28
   5  -3  -3   11.66    1.61
  -5  -3   3   12.20    1.08
   5  -3  -3   14.21    1.27
  -5   3   3   14.79    1.92
   5   3  -3   15.24    1.94
  -5   3   3   15.16    1.23
   5   3  -3   15.49    1.32
   5   3  -3   14.89    1.31
   5   3  -3   13.82    0.97
  -5   3   3   15.55    1.30
   4  -3  -3   45.24    2.51
  -4  -3   3   47.33    2.37
   4  -3  -3   44.51    2.88
  -4  -3   3   44.54    2.34
   4  -3  -3   44.25    2.50
   4   3  -3   42.08    3.31
  -4   3   3   46.52    2.37
  -4   3   3   46.70    2.47
  -4   3   3   47.19    2.51
   4   3  -3   41.46    2.48
   4   3  -3   43.62    2.54
  -3  -3   3   10.54    0.87
  -3  -3   3   10.22    0.79
   3  -3  -3    9.80    0.88
   3  -3  -3    9.57    0.86
   3   3  -3    7.65    1.28
   3   3  -3    7.69    0.90
  -3   3   3    7.69    0.76
  -3   3   3    8.74    0.78
  -3   3   3    7.67    0.87
   3   3  -3    8.14    1.03
   2  -3  -3    6.87    0.63
   2  -3  -3    5.77    0.69
  -2  -3   3    5.68    0.73
  -2  -3   3    6.39    0.83
  -2  -3   3    6.65    0.66
  -2   3   3    7.93    0.65
   2   3  -3    8.57    1.20
  -2   3   3    7.40    0.63
  -2   3   3    8.21    1.11
   2   3  -3    7.17    0.81
  -2   3   3    7.22    0.81
   2   3  -3    7.62    1.05
  -1  -3   3   91.19    4.24
   1  -3  -3   89.91    4.00
  -1  -3   3   93.39    4.23
  -1  -3   3   89.74    4.79
  -1   3   3   91.71    4.01
  -1   3   3   91.42    3.78
  -1   3   3   90.48    4.00
   1   3  -3   93.34    5.33
   1   3  -3   91.61    4.35
   0  -3   3  226.53   10.98
   0  -3   3  215.83    9.67
   0  -3   3  221.69    9.61
   0   3   3  208.80    8.53
   0   3   3  218.31    8.76
   0   3  -3  227.29    9.63
   1  -3   3   55.79    2.89
   1  -3   3   58.21    3.26
   1  -3   3   55.72    2.88
  -1   3  -3   52.98    2.69
  -1   3  -3   56.37    2.94
   1   3   3   51.79    2.66
   2  -3   3   23.19    1.86
   2  -3   3   24.19    1.87
   2  -3   3   24.81    1.68
   2  -3   3   26.63    1.67
  -2   3  -3   23.97    1.52
   2   3   3   23.23    1.93
  -2   3  -3   24.94    1.69
   3  -3   3   60.06    3.32
   3  -3   3   63.69    3.33
   3  -3   3   58.34    3.46
   3  -3   3   68.69    3.38
   3  -3   3   64.10    3.73
  -3   3  -3   59.44    3.06
   3   3   3   54.12    3.15
  -3   3  -3   60.51    3.32
   4  -3   3   27.21    2.03
   4  -3   3   23.78    1.90
   4  -3   3   27.05    1.95
   4  -3   3   28.07    2.01
   4  -3   3   27.83    2.18
   4   3   3   28.02    1.92
   5  -3   3   12.49    1.50
   5   3   3   13.47    1.09
   5   3   3   13.62    0.79
   5   3   3   15.27    1.47
   6  -3   3   25.80    2.05
   6  -3   3   26.80    2.02
   6   3   3   25.07    1.48
   6   3   3   25.20    2.01
   6   3   3   26.30    1.28
  -6   3  -3   24.97    1.80
   6   3   3   24.36    1.29
   7  -3   3   11.97    1.49
  -7   3  -3   10.71    1.19
   7   3   3   13.34    1.53
   7   3   3   12.18    0.88
  -7   3  -3   11.69    1.04
   7   3   3   12.71    1.09
   8  -3   3    3.85    0.91
   8   3   3    4.23    0.74
   8   3   3    4.21    0.61
  -8   3  -3    5.48    0.73
   8   3   3    2.97    0.97
   8   3   3    4.78    0.68
   9  -3   3   36.32    2.05
  -9  -3  -3   34.73    2.27
  -9   3  -3   36.31    1.83
   9   3   3   34.57    1.74
   9   3   3   33.22    2.45
   9   3   3   34.10    1.78
   9   3   3   34.72    1.72
  10  -3   3   20.44    1.30
  10   3   3   21.63    1.26
  10   3   3   19.92    1.25
  10   3   3   20.53    1.22
  10   3   3   20.51    1.82
 -10   3  -3   21.62    1.20
  11  -3   3    3.74    0.73
  11   3   3    2.70    0.54
  11   3   3    2.15    0.42
  11   3   3    2.21    0.43
  11  -4  -3    5.65    0.71
 -11  -4   3    7.79    0.83
 -11   4   3    6.05    0.65
 -11   4   3    6.88    0.71
  11   4  -3    5.98    0.68
  11   4  -3    4.47    0.56
  10  -4  -3    4.42    0.77
 -10  -4   3    5.62    0.81
  10   4  -3    4.27    0.89
 -10   4   3    3.13    0.59
 -10   4   3    3.97    0.61
  10   4  -3    3.25    0.57
  10   4  -3    3.80    0.57
  10   4  -3    2.89    0.66
   9   4  -3    1.29    0.46
   9   4  -3    0.65    0.44
   9   4  -3    0.59    0.71
  -9   4   3    0.27    0.37
  -9   4   3    0.59    0.58
   9   4  -3    0.57    0.37
  -9   4   3    1.03    0.43
   8  -4  -3   19.89    1.84
  -8  -4   3   19.70    1.57
  -8   4   3   18.98    1.63
   8   4  -3   19.77    1.24
  -8   4   3   18.27    1.44
  -8   4   3   18.57    1.30
   8   4  -3   17.10    1.42
   8   4  -3   19.40    1.77
   8   4  -3   20.65    1.28
   7  -4  -3    7.82    1.24
  -7  -4   3    9.09    1.10
   7  -4  -3    8.82    1.54
  -7   4   3   10.40    1.25
   7   4  -3   12.05    1.42
   7   4  -3   10.01    0.91
  -7   4   3    9.23    1.07
  -7   4   3   11.03    0.95
   7   4  -3   10.82    0.90
  -7   4   3    8.78    1.21
  -7   4   3    7.20    1.79
  -6  -4   3   13.84    1.19
   6  -4  -3   11.42    1.40
   6  -4  -3   11.84    1.66
   6  -4  -3    9.45    1.43
  -6  -4   3   10.25    1.09
   6   4  -3    9.92    1.40
  -6   4   3    9.43    0.98
  -6   4   3    9.20    0.88
  -6   4   3    6.57    0.92
   6   4  -3    6.07    0.98
   6   4  -3   10.00    0.91
  -6   4   3    9.73    1.23
  -6   4   3   11.40    2.09
  -6   4   3    6.44    1.09
  -6   4   3    9.51    1.21
   6   4  -3    8.97    0.83
  -6   4   3    9.84    1.10
   5  -4  -3   79.17    4.19
  -5  -4   3   83.37    3.91
  -5  -4   3   77.31    3.85
   5  -4  -3   78.65    4.17
  -5   4   3   78.67    3.22
  -5   4   3   76.58    3.47
   5   4  -3   77.63    3.24
  -5   4   3   78.75    3.80
  -5   4   3   81.28    3.49
   5   4  -3   74.19    3.17
   5   4  -3   62.17    3.62
  -5   4   3   77.13    3.41
  -5   4   3   76.15    3.87
   5   4  -3   77.94    4.07
   5   4  -3   79.61    2.96
  -5   4   3   82.21    5.56
   5   4  -3   77.24    3.12
  -4  -4   3    9.42    0.92
  -4  -4   3    7.60    0.96
   4  -4  -3    8.40    1.03
   4  -4  -3    8.65    1.01
   4   4  -3    7.52    0.75
  -4   4   3    7.37    0.84
   4   4  -3    9.36    1.31
  -4   4   3    9.56    1.82
  -4   4   3    7.52    0.92
  -4   4   3    6.33    0.80
   4   4  -3    7.90    0.89
   4   4  -3    7.46    0.76
   4   4  -3    8.32    1.61
  -4   4   3    7.72    0.78
   4   4  -3    7.46    0.72
  -4   4   3    7.67    0.71
   3  -4  -3   57.01    3.03
  -3  -4   3   57.89    2.94
   3  -4  -3   59.89    3.08
  -3  -4   3   58.67    2.96
   3   4  -3   58.55    4.26
   3   4  -3   54.36    2.50
  -3   4   3   57.68    4.29
   3   4  -3   54.23    2.43
  -3   4   3   55.43    2.48
  -3   4   3   57.32    2.85
   3   4  -3   57.05    4.19
  -3   4   3   55.52    2.48
   3   4  -3   56.18    2.55
  -3   4   3   56.39    2.53
  -2  -4   3   24.48    1.58
   2  -4  -3   23.65    1.58
  -2  -4   3   24.50    1.58
   2  -4  -3   23.82    1.55
  -2   4   3   25.28    1.31
  -2   4   3   25.24    1.44
   2   4  -3   25.84    1.46
  -2   4   3   24.47    1.45
   2   4  -3   26.74    2.47
  -2   4   3   25.38    2.49
   2   4  -3   24.66    1.37
   2   4  -3   22.71    1.40
   2   4  -3   25.52    2.44
   2   4  -3   23.87    1.64
  -1  -4   3   44.85    2.53
   1  -4  -3   47.94    2.35
  -1  -4   3   47.56    2.57
   1   4  -3   45.68    2.20
   1   4  -3   46.11    3.56
  -1   4   3   44.76    2.18
  -1   4   3   45.21    1.95
  -1   4   3   44.97    3.59
   1   4  -3   48.19    2.63
   0  -4   3   13.16    1.51
   0  -4   3   16.02    1.31
   0  -4   3   16.06    1.33
   0   4  -3   15.73    1.24
   0   4  -3   14.82    1.28
   0   4  -3   14.11    1.12
   0   4   3   15.71    1.89
   0   4  -3   14.76    1.82
   0   4   3   15.10    0.82
   0   4   3   15.75    0.89
   1  -4   3   33.18    2.15
   1  -4   3   33.30    2.13
   1  -4   3   28.37    2.26
  -1   4  -3   34.23    2.88
  -1   4  -3   31.58    1.78
  -1   4  -3   32.12    1.87
   1   4   3   33.24    1.47
  -1   4  -3   36.24    2.17
   1   4   3   31.83    2.81
  -1   4  -3   33.11    1.98
   2  -4   3   15.14    1.47
   2  -4   3   13.43    1.61
   2  -4   3   15.17    1.41
  -2   4  -3   16.50    1.22
  -2   4  -3   18.04    1.51
  -2   4  -3   19.11    2.02
  -2   4  -3   15.55    1.34
  -2   4  -3   16.54    1.23
  -2   4  -3   15.04    1.30
   3  -4   3   16.08    1.56
   3  -4   3   16.17    1.72
   3  -4   3   15.79    1.52
  -3   4  -3   17.68    2.07
  -3   4  -3   15.73    1.30
  -3   4  -3   15.95    1.35
  -3   4  -3   16.29    1.42
  -3   4  -3   17.11    1.30
   4  -4   3   18.28    1.88
   4  -4   3   22.56    1.83
   4  -4   3   19.57    1.88
   4  -4   3   18.16    1.78
  -4   4  -3   18.07    1.67
  -4   4  -3   18.19    1.45
  -4   4  -3   19.63    1.45
  -4   4  -3   17.96    1.50
  -4   4  -3   18.91    2.22
   5  -4   3   53.18    3.32
  -5   4  -3   50.06    2.79
   5   4   3   54.96    3.36
  -5   4  -3   52.17    2.70
  -5   4  -3   53.75    2.91
   6  -4   3   23.57    1.84
  -6   4  -3   18.44    1.60
  -6   4  -3   21.75    1.75
  -6   4  -3   20.20    1.57
   6   4   3   20.75    2.13
   6   4   3   18.83    1.33
   6   4   3   19.40    1.05
   7  -4   3   10.97    1.39
   7   4   3   12.33    1.15
  -7   4  -3   14.04    1.30
   7   4   3   12.79    0.85
  -7   4  -3   11.60    1.14
  -7   4  -3   12.29    1.40
   7   4   3   12.90    0.88
   7   4   3    7.51    1.39
  -8  -4  -3   13.14    1.37
   8  -4   3   14.72    1.40
   8   4   3   14.24    0.94
   8   4   3   11.96    1.68
  -8   4  -3   13.02    1.43
   8   4   3   12.94    1.06
   8   4   3   12.57    0.89
   9  -4   3   23.57    1.51
   9   4   3   16.89    1.78
   9   4   3   22.64    1.17
   9   4   3   21.02    1.09
   9   4   3   23.11    1.31
  10  -4   3   19.53    1.15
  10   4   3   21.00    1.09
  10   4   3   19.00    1.16
  -9  -5   3    5.59    0.87
   9   5  -3    7.86    0.69
   9   5  -3    8.33    0.74
  -9   5   3    8.73    0.59
  -9   5   3    7.47    0.84
  -9   5   3    9.48    0.61
   8   5  -3   14.50    1.07
  -8   5   3   16.10    0.90
  -8   5   3   16.43    0.96
  -8   5   3   14.24    1.34
   8   5  -3   16.60    1.02
   7  -5  -3   12.03    1.45
  -7   5   3   12.84    1.17
  -7   5   3   11.40    1.25
   7   5  -3   13.63    1.06
   7   5  -3   12.08    0.92
  -7   5   3   13.41    1.26
  -7   5   3   12.32    0.80
  -7   5   3   12.49    0.85
   6  -5  -3    9.13    1.34
   6  -5  -3    8.89    1.47
  -6  -5   3    7.75    1.10
   6   5  -3    9.07    0.84
  -6   5   3    9.76    0.72
  -6   5   3    9.82    0.74
  -6   5   3   10.66    1.01
  -6   5   3   10.95    1.11
  -6   5   3   11.28    2.00
  -6   5   3    8.60    1.17
   6   5  -3   10.88    1.00
  -5  -5   3    2.87    0.74
   5  -5  -3    3.17    0.87
  -5   5   3    1.14    0.50
   5   5  -3    1.52    0.41
  -5   5   3    1.24    0.95
  -5   5   3    2.02    0.35
   5   5  -3    1.85    0.55
  -5   5   3    0.92    0.46
  -5   5   3    2.44    0.38
   4  -5  -3   18.31    1.65
  -4  -5   3   16.51    1.46
   4   5  -3   21.12    1.36
  -4   5   3   19.05    1.33
   4   5  -3   19.15    2.24
  -4   5   3   19.21    1.29
   4   5  -3   20.39    1.22
  -4   5   3   20.62    2.40
   4   5  -3   19.44    1.24
  -3  -5   3   42.24    2.52
  -3  -5   3   42.64    2.49
   3  -5  -3   44.59    2.55
   3  -5  -3   43.78    2.59
   3   5  -3   41.01    3.48
  -3   5   3   38.04    3.51
  -3   5   3   41.90    2.07
   3   5  -3   39.27    1.97
   3   5  -3   39.82    2.07
  -3   5   3   38.24    1.98
   3   5  -3   40.17    2.08
  -3   5   3   39.10    2.30
   2  -5  -3   44.67    2.66
  -2  -5   3   47.08    2.76
   2  -5  -3   44.03    2.66
  -2  -5   3   44.61    2.77
   2   5  -3   46.37    3.77
  -2   5   3   48.72    2.14
  -2   5   3   47.82    2.20
   2   5  -3   47.45    2.29
  -2   5   3   46.38    3.89
   2   5  -3   49.84    2.29
   2   5  -3   47.98    2.37
  -2   5   3   44.79    2.43
   1  -5  -3    5.41    0.89
   1  -5  -3    6.39    0.96
  -1  -5   3    5.61    1.07
  -1  -5   3    6.59    1.09
   1   5  -3    5.85    0.94
  -1   5   3    5.71    0.66
  -1   5   3    6.33    0.76
   1   5  -3    6.58    0.62
   1   5  -3    6.98    0.89
   1   5  -3    6.38    0.82
   1   5  -3    5.91    1.33
  -1   5   3    7.17    1.59
   1   5  -3    6.37    0.54
   1   5  -3    7.78    0.94
  -1   5   3    5.92    0.62
   0  -5   3   10.59    1.29
   0  -5   3   10.33    1.24
   0  -5  -3   10.10    0.96
   0  -5   3   10.57    1.65
   0   5  -3    9.37    0.79
   0   5   3    9.08    0.67
   0   5  -3   10.04    0.79
   0   5   3    9.78    0.81
   0   5  -3    9.24    0.98
   0   5  -3    9.52    1.11
   0   5  -3   11.04    1.72
   0   5   3    9.85    1.92
   0   5   3   10.00    0.83
   0   5  -3    8.65    1.07
   0   5  -3    8.77    0.93
   1  -5   3   20.49    2.02
   1  -5   3   20.94    1.77
   1  -5   3   21.34    1.81
  -1   5  -3   19.55    1.20
  -1   5  -3   18.71    1.59
  -1   5  -3   20.51    1.54
  -1   5  -3   20.03    2.27
  -1   5  -3   20.96    1.41
   1   5   3   18.25    1.10
   1   5   3   21.53    2.46
  -1   5  -3   21.43    1.26
  -1   5  -3   18.66    1.36
   2  -5   3   23.37    1.95
   2  -5   3   23.78    1.97
   2  -5   3   22.86    2.12
  -2   5  -3   23.05    1.34
  -2   5  -3   23.95    2.49
  -2   5  -3   21.19    1.47
  -2   5  -3   21.35    1.51
  -2   5  -3   21.80    1.40
  -2   5  -3   21.40    1.74
  -2   5  -3   21.53    1.71
   3  -5   3    5.57    1.25
   3  -5   3    5.62    1.09
  -3   5  -3    3.52    0.76
  -3   5  -3    4.11    1.03
  -3   5  -3    4.53    0.80
  -3   5  -3    3.67    0.66
  -3   5  -3    6.29    1.56
  -3   5  -3    3.81    0.67
  -3   5  -3    2.71    0.78
   4  -5   3    6.43    1.24
   4  -5   3    7.03    1.23
  -4   5  -3    6.80    1.05
  -4   5  -3    5.82    0.82
  -4   5  -3    6.88    0.82
  -4   5  -3    6.98    1.60
  -4   5  -3    5.84    0.87
  -4   5  -3    6.57    1.12
  -4   5  -3    7.06    1.05
   5  -5   3   11.84    1.45
  -5   5  -3   13.98    1.29
  -5   5  -3   13.73    1.50
  -5   5  -3   12.44    1.14
  -5   5  -3   13.62    1.08
   6  -5   3   15.52    1.59
  -6   5  -3   20.65    1.45
  -6   5  -3   19.92    1.45
  -6   5  -3   19.98    1.33
  -6   5  -3   19.71    1.69
   7  -5   3   15.13    1.34
  -7   5  -3   13.55    1.07
  -7   5  -3   15.40    1.42
  -7   5  -3   13.96    1.15
  -7   5  -3   14.18    1.08
   8  -5   3    6.23    0.83
  -8   5  -3    5.97    0.88
  -8   5  -3    7.89    0.74
   8   5   3    6.83    0.62
  -8   5  -3    6.57    0.75
  -7   6   3    4.03    0.60
   7   6  -3    4.13    0.53
   6  -6  -3   15.33    1.37
  -6   6   3   13.98    1.17
   6   6  -3   13.94    1.02
   6   6  -3   14.95    0.81
  -6   6   3   13.25    0.96
  -6   6   3   12.71    1.09
   5  -6  -3    3.14    0.81
  -5   6   3    2.01    0.53
   5   6  -3    2.32    0.53
   5   6  -3    1.72    0.39
  -5   6   3    2.21    0.67
  -5   6   3    3.22    1.21
  -5   6   3    2.68    0.50
  -4   6   3    4.60    1.31
  -4   6   3    7.40    0.71
  -4   6   3    7.82    0.82
   4   6  -3    8.23    0.84
   4   6  -3    7.85    0.74
  -3  -6   3    6.51    1.26
   3   6  -3    9.10    0.84
  -3   6   3    9.10    1.62
   3   6  -3    9.25    0.90
   3   6  -3    9.26    1.58
  -3   6   3    8.44    0.73
  -3   6   3    8.43    0.82
  -2  -6   3   18.32    1.70
  -2  -6   3   15.93    1.84
   2  -6  -3   18.11    1.53
   2   6  -3   20.73    1.25
   2   6  -3   21.24    2.30
  -2   6   3   20.59    1.10
  -2   6   3   20.46    1.24
   2   6  -3   23.33    1.38
  -2   6   3   19.38    2.27
  -1  -6   3    9.45    1.33
  -1  -6   3   10.28    1.61
   1  -6  -3   10.30    1.08
   1   6  -3    9.93    0.94
  -1   6   3   10.36    0.69
   1   6  -3    8.54    1.74
  -1   6   3    9.34    1.62
  -1   6   3    9.08    0.78
   1   6  -3   11.29    0.92
   0  -6   3    9.63    1.37
   0   6  -3   11.11    0.79
   0   6  -3   11.11    0.93
   0   6  -3    9.85    1.65
   0   6  -3   10.27    1.00
   0   6   3   10.10    1.72
   0   6   3    9.65    0.76
   1  -6   3   12.34    1.48
   1  -6   3   12.27    1.61
   1   6   3   13.25    0.82
  -1   6  -3   13.06    1.12
   1   6   3   14.71    1.97
  -1   6  -3   13.49    1.86
  -1   6  -3   14.38    1.03
  -1   6  -3   12.73    1.05
   2  -6   3   10.12    1.40
  -2   6  -3    8.55    1.26
  -2   6  -3    9.54    1.80
  -2   6  -3    8.00    0.93
  -2   6  -3    8.25    0.88
  -2   6  -3    7.35    0.87
   3  -6   3    8.76    1.21
  -3   6  -3    7.46    0.92
  -3   6  -3    6.75    0.88
  -3   6  -3    8.61    1.07
  -3   6  -3    8.53    1.51
  -3   6  -3    7.23    0.83
   4  -6   3    3.41    0.78
  -4   6  -3    3.42    0.61
  -4   6  -3    4.77    0.74
  -4   6  -3    5.05    1.43
  -4   6  -3    3.50    0.71
  -4   6  -3    3.47    0.64
   5  -6   3    7.27    1.05
  -5   6  -3    6.85    0.79
  -5   6  -3    5.54    0.83
  -5   6  -3    6.78    0.87
   6  -6   3    4.42    0.65
  -6   6  -3    3.42    0.54
  -6   6  -3    4.62    0.61
  -1  -7   3    4.59    0.83
   1   7  -3    6.05    0.63
   1   7  -3    5.59    0.80
   0  -7   3    4.94    0.79
   0   7  -3    3.44    0.50
   0   7  -3    3.28    0.64
  13   0  -4   17.38    1.38
  13   0  -4   17.72    1.23
  13   0  -4   18.37    1.15
 -13   0   4   19.10    1.18
 -12   0   4    3.37    0.66
  12   0  -4    3.36    0.75
  12   0  -4    4.21    0.81
  12   0  -4    4.31    0.79
  11   0  -4   33.25    2.26
 -11   0   4   32.65    2.05
  10   0  -4    0.12    0.46
  10   0  -4    0.63    0.49
  10   0  -4   -0.27    0.63
 -10   0   4    0.64    0.55
  -9   0   4   82.70    4.05
   9   0  -4   81.05    3.69
   9   0  -4   84.85    3.65
   8   0  -4   99.04    6.22
   7   0  -4   72.93    4.56
   7   0  -4   69.01    3.43
  -7   0   4   62.83    3.88
  -7   0   4   67.01    3.82
   6   0  -4    1.07    0.80
  -6   0   4    0.12    0.33
  -6   0   4    0.68    0.47
  -6   0   4    1.55    0.64
   5   0  -4   92.46    4.27
   5   0  -4   88.62    4.33
  -5   0   4   88.42    4.89
  -5   0   4   88.45    3.68
  -5   0   4   84.67    4.57
   5   0  -4   82.70    4.65
   5   0  -4   85.20    4.99
  -5   0   4   91.55    4.61
   4   0  -4   18.07    1.25
   4   0  -4   21.48    1.45
  -4   0   4   18.42    1.41
  -4   0   4   18.84    1.23
  -4   0   4   16.74    1.10
  -4   0   4   19.20    1.31
   4   0  -4   17.67    1.48
   4   0  -4   18.92    1.21
  -4   0   4   17.71    1.38
  -4   0   4   18.18    1.03
  -3   0   4   59.95    3.41
  -3   0   4   60.60    3.24
   3   0  -4   70.97    3.48
   3   0  -4   58.12    3.04
   3   0  -4   63.54    3.01
  -3   0   4   62.64    3.01
  -3   0   4   63.36    2.60
   3   0  -4   63.88    3.11
   3   0  -4   59.92    3.41
  -3   0   4   59.57    3.21
  -3   0   4   57.01    2.84
   2   0  -4   37.97    2.19
  -2   0   4   34.19    1.95
  -2   0   4   36.74    2.02
  -2   0   4   36.76    1.90
   2   0  -4   34.35    2.05
   2   0  -4   35.38    1.59
  -2   0   4   36.85    2.15
  -2   0   4   35.72    1.62
   2   0  -4   37.13    1.95
   2   0  -4   37.13    1.91
   2   0  -4   35.77    1.93
   1   0  -4   70.71    3.61
   1   0  -4   74.39    3.73
  -1   0   4   74.53    3.44
   1   0  -4   82.35    3.98
  -1   0   4   74.39    3.96
  -1   0   4   79.18    3.66
   1   0  -4   71.73    3.01
  -1   0   4   72.95    3.05
   1   0  -4   74.19    3.46
   1   0  -4   72.66    3.43
   0   0   4    0.66    0.28
   0   0  -4    0.60    0.26
   0   0   4    0.65    0.28
   0   0  -4    0.75    0.39
   0   0  -4    0.80    0.31
   0   0   4    0.65    0.34
   0   0  -4    0.61    0.32
   0   0  -4    0.49    0.32
  -1   0  -4  398.63   16.47
  -1   0  -4  409.26   18.91
  -1   0  -4  372.38   16.23
   1   0   4  394.14   16.22
  -1   0  -4  376.81   17.66
  -1   0  -4  385.44   14.71
  -2   0  -4   58.99    3.20
   2   0   4   56.52    3.11
  -2   0  -4   62.16    3.06
  -2   0  -4   60.59    2.50
  -2   0  -4   58.62    2.82
  -3   0  -4  105.75    5.16
  -3   0  -4  104.66    4.76
  -3   0  -4  104.24    5.43
  -3   0  -4  104.63    4.24
  -3   0  -4  105.58    5.66
  -4   0  -4   53.17    3.34
  -4   0  -4   53.48    3.06
  -4   0  -4   55.70    2.42
  -4   0  -4   52.63    2.97
  -4   0  -4   55.38    2.73
  -5   0  -4  107.40    5.62
  -5   0  -4  107.40    4.94
  -5   0  -4  106.06    4.41
   5   0   4   99.65    4.92
   6   0   4   37.68    2.36
  -6   0  -4   37.73    1.96
   6   0   4   34.47    2.25
  -6   0  -4   38.03    2.47
   7   0   4   24.31    1.42
  -7   0  -4   27.82    1.64
   7   0   4   25.14    1.92
   7   0   4   24.69    1.56
   7   0   4   24.02    1.91
   8   0   4   -0.86    0.57
   8   0   4    0.22    0.51
   8   0   4    0.83    0.57
  -8   0  -4   -0.02    0.46
   8   0   4    0.43    0.61
   9   0   4    2.13    0.63
  -9   0  -4    0.90    0.86
   9   0   4    1.13    0.77
   9   0   4    0.40    0.68
   9   0   4    1.21    0.59
  10   0   4    4.47    0.99
  10   0   4    5.23    0.78
  10   0   4    4.20    0.68
  10   0   4    4.47    0.97
  11   0   4    8.89    1.28
  11   0   4    9.24    0.98
  11   0   4    8.54    1.10
  11   0   4   10.28    0.90
  12   0   4    9.44    0.70
  12   0   4    9.16    0.71
  12   0   4    8.37    0.67
  12   0   4    9.28    0.96
 -13  -1   4    1.89    0.66
  13  -1  -4    1.49    0.52
  13   1  -4    2.34    0.49
 -13   1   4    1.40    0.34
  13   1  -4    2.31    0.59
  13   1  -4    2.31    0.50
  12  -1  -4   12.06    1.32
  12   1  -4   11.87    1.09
  12   1  -4   12.35    1.19
  12   1  -4   11.12    1.43
  12   1  -4   12.40    0.87
 -12   1   4   11.64    0.98
  12   1  -4    9.74    0.93
 -11  -1   4   12.01    1.16
  11  -1  -4   11.25    1.10
  11  -1  -4   10.89    1.46
  11   1  -4   12.91    1.27
 -11   1   4   12.70    1.11
  11   1  -4   12.64    1.52
  11   1  -4   11.64    1.00
  11   1  -4   12.03    1.24
  11   1  -4   13.01    1.22
  10  -1  -4   21.32    1.63
 -10  -1   4   20.42    1.65
 -10   1   4   23.83    1.58
  10   1  -4   22.61    1.50
  10   1  -4   22.53    1.81
  10   1  -4   23.20    1.63
  10   1  -4   24.07    1.80
   9  -1  -4   14.92    1.52
  -9  -1   4   14.68    1.50
   9   1  -4   17.07    1.54
   9   1  -4   17.07    1.58
  -9   1   4   11.77    1.33
   9   1  -4   16.21    1.31
   9   1  -4   14.99    1.41
  -8  -1   4   25.96    1.82
   8  -1  -4   25.98    2.66
   8   1  -4   24.62    1.83
   8   1  -4   21.36    2.39
  -7  -1   4    9.99    1.51
   7  -1  -4    7.21    1.52
   7  -1  -4    6.58    0.84
  -7  -1   4    6.96    0.92
  -7   1   4    5.63    0.99
   7   1  -4    8.33    0.85
   7   1  -4    6.84    0.99
   7   1  -4    3.57    1.09
  -6  -1   4  175.95    8.03
   6  -1  -4  175.27    9.65
   6  -1  -4  167.66    9.38
   6  -1  -4  180.98    8.59
   6   1  -4  186.69    8.19
  -6   1   4  180.06    7.30
  -6   1   4  178.32    8.60
   6   1  -4  188.09    9.63
  -5  -1   4  108.69    5.68
   5  -1  -4  108.01    5.40
   5  -1  -4  113.18    5.30
  -5  -1   4  109.85    5.05
  -5  -1   4  109.23    5.86
   5  -1  -4   93.81    5.97
   5  -1  -4  112.14    6.19
   5  -1  -4  112.98    5.44
   5   1  -4  117.67    5.22
  -5   1   4  110.42    4.62
  -5   1   4  105.17    5.98
  -5   1   4  110.90    5.20
  -5   1   4  104.88    4.83
  -5   1   4  114.83    5.42
   5   1  -4  111.83    6.11
   4  -1  -4  255.66   11.07
   4  -1  -4  253.40   11.22
  -4  -1   4  255.02   12.52
   4  -1  -4  264.62   12.77
   4  -1  -4  245.24   12.77
   4  -1  -4  266.75   11.75
  -4  -1   4  238.67   12.42
  -4  -1   4  246.44   10.98
  -4  -1   4  251.27   10.87
  -4  -1   4  234.29   11.90
  -4   1   4  240.17   12.66
   4   1  -4  259.58   10.91
  -4   1   4  255.64    9.83
  -4   1   4  257.61   10.89
   4   1  -4  249.58   11.47
  -4   1   4  273.90   11.64
  -4   1   4  245.57   10.18
   4   1  -4  255.85   12.75
  -3  -1   4   22.23    1.39
   3  -1  -4   21.20    1.35
  -3  -1   4   22.98    1.45
   3  -1  -4   22.21    1.59
   3  -1  -4   23.56    1.59
  -3  -1   4   24.43    1.60
  -3  -1   4   22.93    1.25
   3  -1  -4   23.56    1.36
   3  -1  -4   23.17    1.49
   3   1  -4   19.77    1.33
  -3   1   4   20.61    1.20
  -3   1   4   19.52    1.21
  -3   1   4   19.36    1.55
   3   1  -4   18.94    1.19
  -3   1   4   19.82    1.31
   3   1  -4   19.74    1.53
   2  -1  -4  337.89   14.13
  -2  -1   4  330.85   14.09
  -2  -1   4  332.34   16.09
  -2  -1   4  308.16   15.33
  -2  -1   4  337.10   16.16
   2  -1  -4  337.71   16.22
   2  -1  -4  333.68   12.59
   2  -1  -4  335.76   15.13
  -2  -1   4  330.06   14.04
  -2   1   4  328.23   13.04
   2   1  -4  314.73   16.10
  -2   1   4  346.80   12.70
   2   1  -4  332.22   15.07
  -2   1   4  334.86   13.91
  -2   1   4  335.68   16.34
   2   1  -4  340.97   16.28
   2   1  -4  336.67   14.04
  -1  -1   4   34.58    1.94
  -1  -1   4   34.38    1.76
   1  -1  -4   35.86    1.49
   1  -1  -4   34.46    1.82
   1  -1  -4   35.53    1.71
  -1  -1   4   35.30    1.98
  -1  -1   4   37.78    2.06
  -1  -1   4   37.30    1.92
  -1   1   4   32.75    2.16
   1   1  -4   33.57    1.88
   1   1  -4   35.56    1.85
  -1   1   4   34.67    1.74
  -1   1   4   33.51    1.61
   1   1  -4   37.10    1.97
   1   1  -4   30.49    1.90
  -1   1   4   34.55    1.66
  -1   1   4   31.67    1.79
   1   1  -4   34.71    2.06
   0  -1  -4  117.61    5.18
   0  -1   4  124.45    6.09
   0  -1   4  118.77    5.36
   0  -1   4  127.05    5.80
   0  -1  -4  125.17    5.63
   0  -1   4  119.19    5.39
   0   1  -4  120.16    5.35
   0   1  -4  118.63    5.40
   0   1   4  103.77    5.21
   0   1   4  126.63    5.22
   0   1  -4  117.66    5.69
   0   1  -4  117.77    6.07
   0   1   4  122.15    4.85
   0   1   4  122.34    4.88
   0   1  -4  131.18    6.08
   0   1  -4  117.09    6.01
   1  -1   4  101.50    4.73
   1  -1   4  100.56    5.00
   1  -1   4   99.59    4.42
  -1  -1  -4   92.80    4.19
  -1   1  -4   98.05    4.40
  -1   1  -4   98.94    4.72
   1   1   4   89.30    4.27
  -1   1  -4  101.83    4.98
  -1   1  -4   86.59    4.93
   1   1   4  100.25    4.25
  -1   1  -4   99.55    3.95
  -1   1  -4  102.91    4.97
  -1   1  -4   93.81    4.46
  -1   1  -4   93.76    4.10
   2  -1   4   60.29    3.21
  -2  -1  -4   57.00    2.69
   2  -1   4   58.63    3.04
  -2   1  -4   59.68    2.55
  -2   1  -4   58.20    2.87
  -2   1  -4   59.76    3.01
  -2   1  -4   61.74    3.23
  -2   1  -4   59.36    3.10
  -2   1  -4   59.98    3.27
   3  -1   4   46.67    2.50
  -3  -1  -4   47.56    2.25
  -3  -1  -4   50.09    2.99
  -3   1  -4   47.31    2.67
  -3   1  -4   45.69    2.39
  -3   1  -4   46.64    2.79
  -3   1  -4   45.51    2.13
  -3   1  -4   45.73    2.60
   4  -1   4   53.15    2.80
  -4  -1  -4   50.74    3.37
  -4  -1  -4   52.64    2.60
  -4   1  -4   52.59    2.73
  -4   1  -4   51.40    2.43
  -4   1  -4   54.34    3.29
  -4   1  -4   56.77    3.09
  -4   1  -4   54.61    3.00
   5  -1   4   12.73    1.31
  -5  -1  -4   11.83    0.85
  -5  -1  -4   13.22    0.99
  -5   1  -4   11.11    0.95
   5   1   4   11.13    0.96
  -5   1  -4   11.35    1.11
  -5   1  -4   11.99    1.13
   5   1   4   11.09    1.29
   6  -1   4   30.40    2.10
  -6  -1  -4   30.36    2.12
  -6  -1  -4   32.73    1.67
  -6  -1  -4   31.34    1.85
   6   1   4   31.57    2.08
   6   1   4   29.92    1.90
  -6   1  -4   30.29    1.76
  -6   1  -4   32.17    2.18
  -6   1  -4   26.91    2.08
  -7  -1  -4    8.81    0.92
   7  -1   4    9.59    1.31
   7   1   4    9.89    1.32
   7   1   4   11.61    0.99
   7   1   4   10.68    0.94
  -8  -1  -4   33.38    1.89
   8  -1   4   31.72    2.25
   8  -1   4   31.05    1.66
   8  -1   4   30.55    2.17
   8   1   4   29.39    1.70
   8   1   4   30.54    1.68
   8   1   4   30.93    2.23
   8   1   4   29.95    2.04
   8   1   4   29.74    1.64
   8   1   4   29.78    1.63
   9  -1   4   21.11    1.78
   9  -1   4   21.54    1.81
  -9  -1  -4   18.64    1.44
   9  -1   4   23.71    1.70
   9   1   4   17.40    1.58
   9   1   4   16.39    1.29
   9   1   4   18.53    1.30
   9   1   4   18.90    1.34
   9   1   4   16.28    1.21
   9   1   4   16.36    1.69
 -10  -1  -4   30.30    2.23
  10  -1   4   32.49    1.93
  10  -1   4   31.86    2.00
  10  -1   4   31.66    2.19
  10   1   4   30.46    1.68
  10   1   4   29.20    1.69
  10   1   4   29.40    1.76
  10   1   4   30.34    1.59
  10   1   4   28.03    1.61
  10   1   4   29.90    1.94
  10   1   4   28.44    2.17
  11  -1   4    3.04    0.85
  11  -1   4    2.13    0.53
  11  -1   4    2.17    0.61
  11   1   4    2.08    0.66
  11   1   4    2.36    0.56
 -11   1  -4    1.95    0.64
  11   1   4    2.45    0.58
  11   1   4    3.56    0.44
  11   1   4    1.56    0.59
  11   1   4    2.44    0.37
  11   1   4    1.91    0.75
  12  -1   4   16.71    1.43
 -12  -1  -4   17.59    1.23
  12  -1   4   17.55    1.10
  12  -1   4   18.81    1.20
  12   1   4   17.90    1.05
 -12   1  -4   17.15    1.21
  12   1   4   17.91    1.06
 -12  -2   4    2.37    0.52
  12  -2  -4    1.81    0.38
  12   2  -4    1.15    0.43
  12   2  -4    0.69    0.57
  12   2  -4    1.05    0.40
  12   2  -4    1.28    0.45
 -11  -2   4   17.44    1.40
  11  -2  -4   18.81    1.39
  11   2  -4   16.01    1.25
 -11   2   4   17.89    1.08
  11   2  -4   20.12    1.59
  11   2  -4   18.06    1.24
  11   2  -4   19.73    1.42
  10  -2  -4    7.52    1.07
 -10  -2   4    8.90    1.20
  10   2  -4    9.50    1.06
 -10   2   4    8.83    0.86
  10   2  -4    9.20    1.13
  10   2  -4    7.61    1.14
  10   2  -4    7.76    0.97
  10   2  -4    9.01    0.95
  -9  -2   4   13.46    1.48
  -9  -2   4   14.25    1.41
   9   2  -4   14.27    1.35
   9   2  -4   13.69    1.61
   9   2  -4   13.97    1.19
   9   2  -4   13.76    1.26
   9   2  -4   13.43    1.54
   9   2  -4   14.15    1.43
  -9   2   4   13.34    1.08
   9   2  -4   14.23    1.28
   9   2  -4   12.87    1.35
  -8  -2   4   16.24    1.45
  -8  -2   4   13.51    1.75
  -8  -2   4   18.47    1.51
   8   2  -4   18.41    1.34
  -8   2   4   18.06    1.66
   8   2  -4   17.67    1.51
   8   2  -4   17.86    1.29
   8   2  -4   15.64    1.51
  -8   2   4   17.57    1.24
   8   2  -4   18.17    1.39
   8   2  -4   18.49    1.61
   8   2  -4   19.85    1.66
  -7  -2   4   81.83    3.89
   7  -2  -4   79.80    5.18
   7   2  -4   73.03    3.60
   7   2  -4   76.62    3.86
   7   2  -4   70.64    4.04
   7   2  -4   77.51    3.24
   7   2  -4   68.52    4.96
   7   2  -4   77.86    3.30
   7   2  -4   78.12    2.97
   6  -2  -4   34.03    2.86
  -6  -2   4   31.78    1.94
   6  -2  -4   30.92    2.61
   6  -2  -4   33.98    2.33
   6  -2  -4   32.73    2.20
   6  -2  -4   34.74    2.33
  -6   2   4   31.98    2.19
   6   2  -4   35.31    2.09
   6   2  -4   31.39    2.73
   6   2  -4   33.79    2.18
   5  -2  -4   13.06    1.49
   5  -2  -4   13.53    1.28
  -5  -2   4   13.03    1.09
   5  -2  -4   13.13    1.21
   5  -2  -4   12.40    1.62
   5  -2  -4   13.59    1.28
  -5   2   4   16.95    1.21
  -5   2   4   17.67    1.30
   5   2  -4   15.15    1.28
   5   2  -4   15.94    1.67
   5   2  -4   17.46    1.32
  -5   2   4   17.31    1.24
   4  -2  -4   28.52    1.76
  -4  -2   4   27.86    1.61
   4  -2  -4   27.02    1.76
  -4  -2   4   26.09    1.61
   4  -2  -4   26.94    1.99
   4   2  -4   31.01    1.85
  -4   2   4   29.47    1.74
  -4   2   4   30.69    1.69
  -4   2   4   29.66    1.68
   4   2  -4   29.26    2.25
  -3  -2   4   93.00    4.34
   3  -2  -4   91.74    5.03
  -3  -2   4   91.35    4.95
   3  -2  -4   91.33    4.40
  -3  -2   4   91.40    4.37
   3  -2  -4   91.13    4.44
  -3   2   4   96.31    4.11
   3   2  -4  101.77    5.41
  -3   2   4  101.20    5.34
  -3   2   4  100.64    4.39
  -3   2   4   99.51    4.14
   3   2  -4   96.70    4.53
   2  -2  -4   11.04    0.65
   2  -2  -4   11.38    0.80
  -2  -2   4   11.65    0.87
  -2  -2   4   11.16    0.89
   2  -2  -4   11.15    0.78
  -2  -2   4   11.53    1.08
   2  -2  -4   10.56    0.88
  -2  -2   4   11.36    0.95
  -2   2   4   10.00    1.11
  -2   2   4   11.70    0.90
   2   2  -4   10.71    1.16
  -2   2   4   10.55    0.80
   2   2  -4   10.63    0.98
  -2   2   4   10.85    0.76
  -1  -2   4   74.90    3.50
  -1  -2   4   73.75    3.97
   1  -2  -4   68.37    3.29
  -1  -2   4   71.24    3.51
  -1  -2   4   71.47    3.85
  -1   2   4   80.12    3.37
   1   2  -4   79.85    3.69
  -1   2   4   74.50    3.12
  -1   2   4   75.98    4.28
   1   2  -4   78.27    4.26
  -1   2   4   75.78    3.29
   0  -2   4   47.66    2.53
   0  -2   4   43.79    2.31
   0  -2   4   45.13    2.30
   0  -2   4   44.56    2.56
   0   2  -4   45.27    2.41
   0   2   4   42.54    1.87
   0   2  -4   45.21    2.74
   0   2   4   39.24    2.05
   0   2   4   45.42    2.06
   0   2   4   46.34    2.20
   1  -2   4   63.96    3.26
   1  -2   4   64.72    3.64
   1  -2   4   65.26    3.22
   1  -2   4   66.44    3.47
   1   2   4   66.26    2.63
   1   2   4   59.35    2.87
  -1   2  -4   67.85    3.05
  -1   2  -4   67.06    3.22
   1   2   4   66.96    3.01
   1   2   4   67.56    2.87
  -1   2  -4   66.29    3.34
   2  -2   4    0.62    0.39
   2  -2   4    0.67    0.51
   2  -2   4    0.06    0.29
   2  -2   4   -0.10    0.45
  -2   2  -4    0.32    0.31
  -2   2  -4    0.82    0.33
  -2   2  -4    1.10    0.50
   2   2   4    0.38    0.21
   3  -2   4  112.28    5.48
  -3  -2  -4  104.53    6.10
   3  -2   4  111.27    5.80
  -3   2  -4  106.57    5.33
  -4  -2  -4   42.18    2.00
   4  -2   4   42.30    2.47
   4  -2   4   41.74    2.60
   4  -2   4   39.91    2.52
  -4   2  -4   39.80    2.38
   4   2   4   39.85    1.98
  -5  -2  -4   23.34    1.41
   5  -2   4   22.78    1.68
   5  -2   4   24.11    1.91
  -5   2  -4   24.10    1.67
   5   2   4   27.12    1.90
   5   2   4   22.60    1.36
  -6  -2  -4   27.83    1.68
   6  -2   4   27.36    2.07
   6   2   4   27.36    1.41
   6   2   4   26.31    1.43
   6   2   4   30.13    2.12
   7  -2   4  109.71    5.27
  -7  -2  -4  111.72    4.58
   7   2   4  106.19    4.13
   7   2   4  100.23    4.20
   7   2   4  103.69    5.28
   7   2   4  106.72    3.91
  -8  -2  -4    5.83    0.88
   8  -2   4    5.22    0.85
   8  -2   4    6.29    1.19
   8   2   4    4.25    1.11
  -8   2  -4    4.94    0.89
   8   2   4    3.51    0.62
   8   2   4    5.19    0.78
   8   2   4    5.41    0.76
  -9  -2  -4   14.99    1.25
   9  -2   4   14.73    1.68
   9  -2   4   16.37    1.16
   9  -2   4   14.44    1.59
   9   2   4   14.70    1.16
   9   2   4   15.03    1.13
   9   2   4   12.03    1.07
  -9   2  -4   14.17    1.31
   9   2   4   14.48    1.64
   9   2   4   13.95    1.27
 -10  -2  -4   10.84    1.38
  10  -2   4   12.58    1.28
  10  -2   4    9.20    1.32
  10   2   4    9.30    0.91
  10   2   4   10.64    0.93
 -10   2  -4   11.77    1.07
  10   2   4   10.07    0.92
  10   2   4    6.86    1.17
  10   2   4    9.81    0.94
  11  -2   4    4.16    0.70
  11   2   4    3.74    0.60
  11   2   4    3.40    0.57
  11   2   4    1.98    0.70
  11   2   4    3.50    0.56
 -11   2  -4    4.16    0.66
  12  -3  -4    7.46    0.64
 -12  -3   4    7.96    0.80
  12   3  -4    6.94    0.65
 -12   3   4    7.05    0.86
  11  -3  -4    4.16    0.71
 -11  -3   4    3.59    0.71
 -11   3   4    3.22    0.72
  11   3  -4    3.91    0.67
  11   3  -4    4.09    0.72
  11   3  -4    3.82    0.64
 -11   3   4    2.91    0.72
  11   3  -4    3.70    0.63
 -10  -3   4   10.52    1.47
  10  -3  -4   14.07    1.34
 -10  -3   4   13.01    1.28
  10   3  -4   11.02    1.09
  10   3  -4    8.86    0.85
  10   3  -4   11.85    0.89
  10   3  -4   12.52    1.10
  10   3  -4   12.32    1.05
  10   3  -4   12.87    1.24
  10   3  -4    9.02    1.33
  -9  -3   4    0.75    0.70
  -9  -3   4    2.23    0.80
   9   3  -4    0.76    0.65
   9   3  -4    2.45    0.64
   9   3  -4    1.00    0.60
  -9   3   4    1.34    0.56
  -9   3   4    1.37    0.58
   9   3  -4    1.22    0.50
   9   3  -4    2.22    0.85
  -9   3   4    1.25    0.68
   9   3  -4    1.22    0.61
   9   3  -4    1.73    0.57
  -8  -3   4   11.87    1.29
  -8  -3   4   10.79    1.25
   8   3  -4   12.80    1.29
  -8   3   4   11.97    1.34
  -8   3   4   10.29    1.19
   8   3  -4   12.86    1.05
   8   3  -4   11.42    1.38
   8   3  -4   12.47    1.44
   8   3  -4   12.95    1.20
   8   3  -4   11.72    1.10
  -8   3   4   11.41    1.47
  -7  -3   4    3.41    0.73
   7  -3  -4    2.87    1.14
   7  -3  -4    1.94    0.93
  -7  -3   4    2.00    0.70
  -7   3   4    3.83    0.70
   7   3  -4    3.11    0.80
   7   3  -4    3.62    0.62
  -7   3   4    2.31    0.70
   7   3  -4    2.28    0.87
   7   3  -4    3.47    0.61
   7   3  -4    4.65    0.84
   7   3  -4    2.91    0.81
  -7   3   4    4.60    0.93
   7   3  -4    4.78    0.74
  -6  -3   4   11.19    1.06
   6  -3  -4   10.69    1.38
   6  -3  -4   10.57    1.37
  -6  -3   4   12.51    1.13
   6  -3  -4   10.32    1.98
  -6   3   4   11.26    1.16
   6   3  -4   10.57    1.21
   6   3  -4   11.13    1.00
  -6   3   4   13.97    1.30
   6   3  -4   10.54    1.18
  -6   3   4    8.35    1.84
  -6   3   4   12.52    1.19
   6   3  -4   12.64    1.35
   6   3  -4   10.42    1.80
  -6   3   4   12.18    1.27
   6   3  -4   11.16    0.94
  -5  -3   4   11.28    1.02
   5  -3  -4   10.78    1.18
   5  -3  -4   11.56    1.25
  -5  -3   4   11.79    1.04
  -5   3   4   10.98    1.13
  -5   3   4    9.60    1.10
   5   3  -4   11.43    1.70
   5   3  -4   10.10    0.94
   5   3  -4   12.43    1.27
  -5   3   4   11.12    1.85
  -5   3   4   10.46    1.03
   5   3  -4   10.60    1.19
   4  -3  -4   70.09    3.53
   4  -3  -4   70.57    3.52
  -4  -3   4   67.67    3.36
   4  -3  -4   66.85    4.01
  -4  -3   4   64.33    3.83
  -4  -3   4   69.58    3.38
   4   3  -4   67.23    3.60
  -4   3   4   65.51    3.40
  -4   3   4   67.00    4.76
  -4   3   4   66.13    3.25
   4   3  -4   68.69    4.50
   4   3  -4   68.31    3.48
  -3  -3   4   53.76    2.77
  -3  -3   4   54.47    3.15
   3  -3  -4   52.37    2.77
   3  -3  -4   52.52    2.77
  -3  -3   4   55.88    2.77
  -3   3   4   52.05    2.75
   3   3  -4   57.48    3.02
  -3   3   4   55.93    2.63
   3   3  -4   54.23    3.70
   3   3  -4   50.81    2.85
  -3   3   4   52.62    2.71
   2  -3  -4   42.16    2.20
  -2  -3   4   44.90    2.31
   2  -3  -4   43.60    2.21
  -2  -3   4   45.74    2.31
  -2  -3   4   43.24    2.60
   2   3  -4   44.20    2.49
  -2   3   4   41.98    2.17
  -2   3   4   41.27    2.06
   2   3  -4   43.08    3.06
  -2   3   4   39.29    2.25
   1  -3  -4    5.16    0.48
  -1  -3   4    5.54    0.74
  -1  -3   4    6.43    0.86
  -1  -3   4    5.65    0.73
   1   3  -4    7.04    1.28
  -1   3   4    4.67    0.48
  -1   3   4    4.35    0.49
  -1   3   4    4.00    0.73
   1   3  -4    4.34    0.79
   0  -3   4   27.76    1.70
   0  -3   4   27.55    1.71
   0  -3   4   26.25    1.88
   0   3   4   25.24    1.22
   0   3   4   25.03    1.65
   0   3  -4   29.35    1.85
   1  -3   4   11.76    1.15
   1  -3   4   12.48    1.10
   1  -3   4   11.97    1.32
   1  -3   4   12.64    1.28
  -1   3  -4   13.09    1.07
  -1   3  -4   11.24    1.15
   1   3   4   12.47    1.12
   2  -3   4    9.17    1.19
   2  -3   4    9.91    1.14
   2  -3   4    8.65    1.08
   2  -3   4   11.19    1.30
   2  -3   4   10.30    1.06
  -2   3  -4   10.18    0.97
  -2   3  -4   10.85    1.14
   3  -3   4   10.34    1.28
   3  -3   4    9.87    1.12
   3  -3   4   10.68    1.29
   3  -3   4   10.85    1.17
   3  -3   4    9.92    1.15
  -3   3  -4    8.09    1.09
   4  -3   4   26.57    1.99
   4  -3   4   24.50    1.89
   4   3   4   25.16    1.11
   4   3   4   23.34    1.95
   5  -3   4    7.29    1.29
  -5  -3  -4    5.52    0.68
   5   3   4    5.33    0.58
   5   3   4    4.05    1.03
   6  -3   4   15.92    1.76
   6  -3   4   13.13    1.65
  -6  -3  -4   19.16    1.33
  -6   3  -4   19.81    1.52
   6   3   4   22.14    1.36
  -6   3  -4   18.49    1.34
   6   3   4   21.06    1.12
   6   3   4   19.21    1.93
   6   3   4   19.77    1.07
   7  -3   4   19.09    1.81
   7  -3   4   17.46    1.78
   7   3   4   19.32    1.13
   7   3   4   20.02    1.34
  -7   3  -4   19.03    1.35
   7   3   4   16.22    1.84
  -8  -3  -4    3.43    0.72
   8  -3   4    2.66    0.74
   8  -3   4    3.07    0.98
  -8   3  -4    2.35    0.55
   8   3   4    2.62    0.52
   8   3   4    2.03    0.60
   8   3   4    2.07    0.84
  -9  -3  -4    4.50    0.91
   9  -3   4    2.79    0.61
   9   3   4    1.69    0.57
   9   3   4    3.08    0.53
   9   3   4    3.07    0.92
   9   3   4    2.08    0.49
  -9   3  -4    2.88    0.54
  10  -3   4   27.35    1.91
  10  -3   4   29.51    1.38
  10   3   4   30.59    1.50
  10   3   4   28.96    1.47
  10   3   4   26.44    1.40
  10   3   4   25.48    2.04
 -10   3  -4   27.78    1.41
  11  -3   4    7.97    0.91
  11   3   4    6.80    0.71
  11   3   4    6.74    0.62
  11   3   4    8.11    0.66
  11  -4  -4    9.11    0.86
 -11  -4   4    8.32    0.88
  11   4  -4    9.10    0.76
 -11   4   4    8.95    0.74
 -11   4   4    7.82    0.74
 -10  -4   4    3.32    0.64
  10  -4  -4    2.60    0.69
 -10   4   4    1.76    0.45
  10   4  -4    1.97    0.54
  10   4  -4    1.74    0.44
  10   4  -4    1.77    0.53
 -10   4   4    1.98    0.48
  -9  -4   4   12.03    1.41
   9   4  -4   11.60    0.99
  -9   4   4   12.21    1.19
  -9   4   4   13.20    1.10
  -9   4   4   12.45    1.03
   9   4  -4   13.12    1.05
   9   4  -4   11.93    1.18
   9   4  -4   10.21    1.37
   9   4  -4   12.90    1.12
  -8  -4   4   11.93    1.30
   8  -4  -4    9.05    1.32
   8   4  -4   11.95    1.37
   8   4  -4   10.57    0.93
   8   4  -4    9.49    0.96
   8   4  -4    9.69    1.22
  -8   4   4    9.31    1.00
  -8   4   4    9.48    0.93
  -8   4   4    9.97    1.26
   7  -4  -4   24.00    2.15
  -7  -4   4   19.95    1.64
   7  -4  -4   19.67    1.94
   7   4  -4   23.40    1.89
  -7   4   4   20.00    1.44
   7   4  -4   20.84    1.28
  -7   4   4   21.30    1.61
   7   4  -4   19.96    1.35
  -7   4   4   21.06    1.66
  -7   4   4   20.84    1.32
  -7   4   4   20.58    1.71
   7   4  -4   18.73    1.69
  -6  -4   4    3.19    0.76
   6  -4  -4    3.55    0.99
   6  -4  -4    4.30    1.08
   6  -4  -4    2.83    1.02
  -6  -4   4    3.41    0.80
   6   4  -4    2.35    0.84
   6   4  -4    0.85    0.76
   6   4  -4    2.05    0.53
  -6   4   4    1.72    0.47
   6   4  -4    1.65    0.53
  -6   4   4    1.72    0.69
  -6   4   4    1.52    1.11
  -6   4   4    0.96    0.83
  -6   4   4    1.82    0.58
  -6   4   4    0.81    0.55
   6   4  -4    2.78    0.52
  -6   4   4    1.84    0.45
   6   4  -4    1.69    0.55
  -5  -4   4   10.08    1.15
  -5  -4   4   10.13    1.19
   5  -4  -4   10.02    1.46
   5  -4  -4   10.98    1.32
   5   4  -4   13.77    1.04
   5   4  -4   13.89    1.50
   5   4  -4   13.89    1.15
  -5   4   4   12.59    1.13
  -5   4   4   15.40    2.11
   5   4  -4   13.43    1.52
  -5   4   4   13.45    1.03
  -5   4   4   13.51    1.24
  -5   4   4   12.77    1.12
   5   4  -4   13.31    1.10
  -5   4   4   14.46    1.33
  -5   4   4   13.91    0.95
   5   4  -4   14.10    1.06
  -4  -4   4    5.59    0.88
   4  -4  -4    6.60    0.94
  -4  -4   4    6.75    0.94
   4  -4  -4    6.42    0.96
  -4   4   4    4.95    0.68
   4   4  -4    6.56    0.83
  -4   4   4    5.95    0.82
  -4   4   4    4.17    0.58
   4   4  -4    5.51    1.41
   4   4  -4    5.08    0.75
   4   4  -4    6.46    0.79
  -4   4   4    5.40    0.62
   4   4  -4    3.64    0.60
  -4   4   4    4.85    0.73
  -4   4   4    4.38    1.34
  -3  -4   4   10.42    1.03
   3  -4  -4    9.90    1.03
  -3  -4   4    7.44    0.96
   3  -4  -4    8.98    1.02
   3   4  -4   10.87    1.79
   3   4  -4   12.52    2.13
  -3   4   4   11.78    0.93
  -3   4   4   10.96    1.82
   3   4  -4   11.46    1.14
  -3   4   4   12.35    1.03
   3   4  -4   11.54    1.01
   3   4  -4   11.42    0.92
   3   4  -4   10.46    0.98
  -3   4   4   11.96    0.79
  -3   4   4   12.05    0.94
  -2  -4   4   14.98    1.33
   2  -4  -4   16.54    1.24
  -2  -4   4   15.36    1.32
   2  -4  -4   14.22    1.21
   2   4  -4   15.94    1.20
  -2   4   4   16.96    1.03
   2   4  -4   15.83    1.09
   2   4  -4   17.39    2.06
   2   4  -4   15.43    1.95
  -2   4   4   17.05    1.12
  -2   4   4   16.13    2.05
  -2   4   4   15.82    1.02
   2   4  -4   16.85    1.29
  -1  -4   4    7.40    0.96
   1  -4  -4    7.49    0.74
  -1  -4   4    8.43    1.01
  -1   4   4    7.00    1.56
   1   4  -4    5.88    0.80
   1   4  -4    8.37    1.48
   1   4  -4    7.08    0.84
  -1   4   4    7.03    0.64
   1   4  -4    7.05    0.81
   1   4  -4    5.76    1.12
  -1   4   4    7.02    0.69
   0  -4   4    9.19    1.08
   0  -4   4    9.56    1.10
   0   4  -4    8.40    0.91
   0   4  -4   10.20    1.21
   0   4  -4    8.28    1.49
   0   4  -4    7.76    0.91
   0   4   4    8.81    0.64
   0   4  -4    8.83    1.01
   0   4   4    8.33    0.66
   0   4   4    7.95    1.60
   0   4  -4    9.26    1.01
   1  -4   4   32.05    2.06
   1  -4   4   32.52    2.06
   1  -4   4   30.46    2.20
  -1   4  -4   26.95    1.74
  -1   4  -4   25.56    1.62
  -1   4  -4   26.73    1.82
   1   4   4   27.92    2.71
  -1   4  -4   25.97    1.68
  -1   4  -4   29.09    2.71
   1   4   4   26.22    1.29
   2  -4   4    8.56    1.33
   2  -4   4    8.48    1.16
   2  -4   4   10.22    1.37
  -2   4  -4    8.94    1.55
  -2   4  -4    8.82    1.00
  -2   4  -4    9.00    1.00
  -2   4  -4    9.37    1.16
  -2   4  -4    8.44    1.07
   3  -4   4   28.24    2.22
   3  -4   4   29.38    2.36
   3  -4   4   28.32    2.26
   3  -4   4   28.33    2.18
   3  -4   4   32.47    2.23
  -3   4  -4   30.64    2.83
  -3   4  -4   28.31    1.80
  -3   4  -4   28.28    1.96
  -3   4  -4   29.72    1.83
   4  -4   4    9.78    1.53
   4  -4   4    9.86    1.42
   4  -4   4    7.79    1.29
  -4   4  -4   10.38    1.33
  -4   4  -4    7.41    1.03
  -4   4  -4    8.20    1.12
   5  -4   4    4.57    0.96
   5  -4   4    4.86    1.19
   5   4   4    2.75    0.68
  -5   4  -4    3.07    0.80
  -5   4  -4    3.49    0.84
  -5   4  -4    3.07    0.69
   6  -4   4   21.95    2.02
   6  -4   4   23.81    1.81
  -6   4  -4   21.95    1.56
   6   4   4   18.85    1.37
  -6   4  -4   19.39    1.80
   7  -4   4   24.36    1.91
   7   4   4   23.35    1.27
   7   4   4   25.34    1.47
   7   4   4   19.81    2.16
   8  -4   4    4.31    0.78
   8   4   4    5.58    0.83
   8   4   4    3.86    1.10
   8   4   4    5.18    0.62
   9  -4   4    7.70    0.83
   9   4   4    4.78    1.14
   9   4   4    9.03    0.87
   9   4   4    8.03    0.67
  10  -4   4    7.13    0.50
  10   4   4    6.30    0.58
  -9  -5   4    1.12    0.55
   9   5  -4    0.42    0.46
   9   5  -4    0.81    0.34
   9   5  -4    0.54    0.38
  -8  -5   4    4.55    0.87
  -8   5   4    5.28    0.80
  -8   5   4    6.29    0.51
  -8   5   4    4.13    0.73
   8   5  -4    5.28    0.68
   8   5  -4    6.83    0.69
  -8   5   4    5.75    0.52
   7  -5  -4   -0.14    0.59
  -7   5   4    0.19    0.45
  -7   5   4    1.29    0.59
  -7   5   4   -0.11    0.25
  -7   5   4    0.41    0.50
   7   5  -4   -0.13    0.30
   7   5  -4   -0.16    0.43
  -7   5   4    0.36    0.26
  -6  -5   4    4.67    0.90
   6  -5  -4    4.95    1.04
   6  -5  -4    4.36    1.12
  -6   5   4    4.55    0.77
  -6   5   4    3.41    0.81
  -6   5   4    4.65    0.75
  -6   5   4    3.04    1.27
  -6   5   4    4.33    0.51
   6   5  -4    6.07    0.79
   6   5  -4    4.35    0.60
  -5  -5   4   16.82    1.53
   5  -5  -4   18.56    1.76
   5   5  -4   18.84    1.22
   5   5  -4   22.61    1.40
  -5   5   4   18.81    1.36
  -5   5   4   19.31    2.49
   5   5  -4   20.48    1.34
  -5   5   4   19.76    1.33
  -4  -5   4   15.67    1.41
   4  -5  -4   15.96    1.46
   4   5  -4   13.66    1.17
  -4   5   4   14.34    1.14
   4   5  -4   14.73    1.26
   4   5  -4   14.93    2.07
   4   5  -4   15.13    1.09
  -4   5   4   14.38    1.09
  -4   5   4   16.16    2.20
   3  -5  -4    2.22    0.73
  -3  -5   4    2.05    0.77
  -3   5   4    2.26    1.10
  -3   5   4    1.19    0.43
   3   5  -4    1.54    0.52
   3   5  -4    2.61    0.49
   3   5  -4    1.69    0.66
  -3   5   4    1.69    0.47
   3   5  -4    0.77    0.89
   2  -5  -4   18.26    1.44
   2  -5  -4   15.90    1.31
  -2  -5   4   14.19    1.43
  -2  -5   4   13.00    1.45
  -2   5   4   13.73    1.03
   2   5  -4   14.06    1.18
   2   5  -4   13.66    0.85
   2   5  -4   14.98    2.07
  -2   5   4   13.39    2.03
   2   5  -4   13.12    1.39
   2   5  -4   15.56    1.43
  -2   5   4   15.82    1.26
  -2   5   4   13.99    0.98
   2   5  -4   13.84    1.16
   2   5  -4   14.39    0.87
   1  -5  -4    5.12    0.90
  -1  -5   4    7.06    1.38
  -1  -5   4    5.84    1.09
  -1  -5   4    4.42    0.95
   1   5  -4    7.71    0.92
   1   5  -4    6.69    0.73
  -1   5   4    6.48    1.60
   1   5  -4    4.20    0.88
   1   5  -4    7.21    0.72
  -1   5   4    6.34    0.64
   1   5  -4    6.06    0.91
  -1   5   4    6.36    0.68
   1   5  -4    7.20    0.92
   1   5  -4    6.18    1.47
  -1   5   4    6.57    0.78
   0  -5   4    6.11    1.31
   0  -5   4    4.95    1.03
   0  -5   4    3.97    0.97
   0   5  -4    4.75    0.91
   0   5  -4    6.03    0.69
   0   5  -4    5.61    1.44
   0   5  -4    3.77    0.70
   0   5  -4    6.09    0.91
   0   5   4    3.49    1.32
   0   5  -4    4.84    0.85
   0   5   4    5.75    0.53
   0   5   4    5.56    0.66
   0   5  -4    5.68    0.69
   1  -5   4    1.98    0.96
   1  -5   4    1.56    1.22
   1  -5   4    2.08    0.89
   1  -5   4    1.47    0.80
  -1   5  -4    2.50    0.55
  -1   5  -4    0.77    0.50
   1   5   4    3.28    1.28
  -1   5  -4    2.35    0.70
  -1   5  -4    2.10    0.73
  -1   5  -4    2.01    1.00
  -1   5  -4    1.97    0.50
  -1   5  -4    2.28    0.60
   2  -5   4   21.18    1.89
   2  -5   4   22.67    2.01
   2  -5   4   21.43    2.04
  -2   5  -4   18.87    1.75
  -2   5  -4   24.82    2.56
  -2   5  -4   22.12    1.82
  -2   5  -4   23.82    1.61
  -2   5  -4   22.28    1.39
  -2   5  -4   22.85    1.56
  -2   5  -4   22.61    1.48
   3  -5   4    9.51    1.34
   3  -5   4    7.13    1.36
   3  -5   4    7.33    1.36
  -3   5  -4    5.97    0.93
  -3   5  -4    7.93    0.95
  -3   5  -4    9.14    1.22
  -3   5  -4    6.74    1.00
  -3   5  -4    7.80    0.96
  -3   5  -4    8.29    1.21
  -3   5  -4    8.82    1.80
   4  -5   4   11.08    1.44
  -4   5  -4   11.87    1.45
  -4   5  -4   12.09    1.11
  -4   5  -4    9.92    1.83
  -4   5  -4   10.84    1.18
  -4   5  -4   11.59    1.14
   5  -5   4   14.18    1.45
  -5   5  -4   14.62    1.20
  -5   5  -4   16.81    1.61
  -5   5  -4   15.45    1.33
  -5   5  -4   15.07    1.31
   6  -5   4    4.76    0.85
  -6   5  -4    3.97    0.68
  -6   5  -4    3.48    0.90
  -6   5  -4    3.36    0.66
  -6   5  -4    4.07    0.70
   7  -5   4    2.33    0.67
  -7   5  -4    1.77    0.53
  -7   5  -4    1.13    0.41
  -7   5  -4    2.46    0.71
   8  -5   4    9.11    0.93
  -8   5  -4    6.22    0.71
  -8   5  -4    8.55    0.82
  -8   5  -4    7.75    1.00
   6  -6  -4    2.13    0.62
   6   6  -4    2.03    0.45
  -6   6   4    1.88    0.55
  -6   6   4    2.40    0.45
   6   6  -4    0.49    0.31
  -6   6   4    2.08    0.55
   5  -6  -4    2.49    0.69
  -5  -6   4    1.87    0.78
  -5   6   4    2.99    0.48
  -5   6   4    2.37    0.60
   5   6  -4    0.60    0.37
  -5   6   4    2.29    0.53
   5   6  -4    3.32    0.55
  -4  -6   4    4.91    1.04
  -4   6   4    8.19    1.71
  -4   6   4    9.03    0.73
  -4   6   4    7.94    0.84
   4   6  -4   10.79    0.90
   4   6  -4    8.96    1.56
  -3  -6   4   15.45    1.71
   3   6  -4   13.38    1.07
  -3   6   4   16.49    0.99
   3   6  -4   19.46    2.16
   3   6  -4   18.42    1.21
  -3   6   4   18.75    1.15
  -3   6   4   15.30    2.08
  -2  -6   4    0.93    0.78
  -2   6   4    2.60    1.20
  -2   6   4    1.39    0.35
   2   6  -4    1.64    0.49
   2   6  -4    1.50    0.87
  -2   6   4    1.42    0.43
   2   6  -4    1.57    0.50
  -1  -6   4    8.08    1.41
   1   6  -4    7.74    0.86
   1   6  -4    8.54    0.90
   1   6  -4    9.36    1.65
  -1   6   4    9.87    0.81
  -1   6   4   11.22    1.98
   1   6  -4    8.90    0.72
   0  -6   4    2.78    0.87
   0  -6   4    1.11    0.94
   0   6   4    1.89    0.42
   0   6  -4    3.11    0.55
   0   6  -4    3.96    0.69
   0   6  -4    2.36    0.52
   0   6   4    4.01    1.35
   0   6  -4    3.18    0.82
   0   6  -4    2.11    0.94
   1  -6   4    5.23    1.07
  -1   6  -4    7.23    1.04
  -1   6  -4    6.26    0.80
  -1   6  -4    7.91    1.62
  -1   6  -4    4.55    0.72
  -1   6  -4    4.91    0.75
   2  -6   4    7.33    1.09
  -2   6  -4    8.91    1.10
  -2   6  -4    7.62    1.54
  -2   6  -4    8.37    0.91
  -2   6  -4    8.13    0.91
  -2   6  -4    7.56    0.97
   3  -6   4    2.41    0.75
  -3   6  -4    2.79    0.60
  -3   6  -4    3.47    1.12
  -3   6  -4    3.00    0.67
  -3   6  -4    2.67    0.61
  -3   6  -4    2.34    0.59
   4  -6   4   16.84    1.38
  -4   6  -4   15.88    1.23
  -4   6  -4   17.06    1.31
  -4   6  -4   16.43    2.00
  -4   6  -4   16.73    1.23
   5  -6   4   13.17    1.16
  -5   6  -4   12.43    1.01
  -5   6  -4   12.33    0.99
 -13   0   5    0.78    0.37
  13   0  -5    0.35    0.36
  13   0  -5   -0.08    0.46
 -13   0   5    0.90    0.47
  13   0  -5    0.72    0.49
  12   0  -5   26.97    1.81
  12   0  -5   26.51    1.86
  12   0  -5   28.84    1.80
 -12   0   5   28.45    1.66
  11   0  -5    2.96    0.79
 -11   0   5    2.84    0.68
  10   0  -5    1.07    0.53
 -10   0   5    1.22    0.68
  10   0  -5   -0.43    0.77
   9   0  -5    9.03    1.06
  -9   0   5    8.18    1.04
   9   0  -5    8.44    1.00
   8   0  -5   23.44    2.52
  -7   0   5   54.11    3.26
   7   0  -5   49.33    3.70
   7   0  -5   53.35    2.87
   6   0  -5   56.10    3.08
  -6   0   5   57.13    3.35
  -6   0   5   61.14    3.33
   6   0  -5   57.35    3.80
   5   0  -5   34.81    2.03
   5   0  -5   34.74    2.46
  -5   0   5   35.26    2.24
  -5   0   5   33.25    2.38
  -5   0   5   33.53    2.08
  -5   0   5   34.67    1.76
   5   0  -5   36.54    2.25
  -4   0   5   59.09    3.10
  -4   0   5   60.61    2.62
  -4   0   5   60.82    3.23
   4   0  -5   58.59    3.10
   4   0  -5   63.49    3.42
   4   0  -5   56.61    3.46
  -4   0   5   56.29    3.47
  -4   0   5   58.95    3.19
  -3   0   5    9.08    0.90
   3   0  -5   10.04    0.98
  -3   0   5    9.93    0.91
   3   0  -5    8.95    0.91
   3   0  -5    9.22    0.92
   3   0  -5    9.74    0.83
  -3   0   5    8.71    0.77
  -3   0   5    9.12    0.97
  -3   0   5   10.20    0.72
   2   0  -5  132.99    5.30
   2   0  -5  144.89    6.92
   2   0  -5  128.81    6.02
  -2   0   5  130.94    5.32
  -2   0   5  136.53    6.94
  -2   0   5  137.54    6.41
  -2   0   5  131.10    6.00
   2   0  -5  137.71    6.40
   2   0  -5  129.89    6.69
   2   0  -5  133.96    6.05
   1   0  -5   24.70    1.63
  -1   0   5   26.35    1.31
  -1   0   5   26.66    1.46
  -1   0   5   23.92    1.68
   1   0  -5   23.74    1.22
   1   0  -5   24.61    1.49
   1   0  -5   23.43    1.43
  -1   0   5   24.97    1.49
   0   0  -5   96.54    4.00
   0   0  -5   98.48    4.53
   0   0  -5  106.84    5.21
   0   0   5  100.08    4.53
   0   0  -5   97.24    4.84
   1   0   5    8.32    0.76
  -1   0  -5    7.97    0.80
  -1   0  -5    8.53    0.85
  -1   0  -5    8.78    0.77
  -1   0  -5    9.15    0.62
  -2   0  -5  433.85   20.45
  -2   0  -5  419.12   19.16
  -2   0  -5  412.27   15.91
  -2   0  -5  411.29   17.80
  -3   0  -5   69.27    3.83
  -3   0  -5   69.77    3.37
  -3   0  -5   70.06    2.98
  -3   0  -5   69.60    3.68
  -3   0  -5   66.84    4.06
  -4   0  -5   43.07    2.02
  -4   0  -5   40.45    2.54
  -4   0  -5   40.90    2.91
  -4   0  -5   41.76    2.30
  -5   0  -5   27.58    1.98
  -5   0  -5   28.67    1.78
  -5   0  -5   27.26    1.55
   5   0   5   28.41    2.03
  -6   0  -5   49.45    2.44
   6   0   5   45.94    2.85
  -6   0  -5   50.02    2.78
   7   0   5    5.46    0.87
   7   0   5    4.68    1.06
  -7   0  -5    4.76    0.82
   8   0   5   24.91    2.08
   8   0   5   24.44    1.65
   8   0   5   23.01    1.91
  -8   0  -5   24.97    1.65
   8   0   5   21.65    1.71
   8   0   5   21.78    1.65
   9   0   5    1.26    0.75
   9   0   5    0.44    0.75
   9   0   5    1.09    0.54
   9   0   5    1.62    0.57
  10   0   5   11.17    1.01
  10   0   5   12.72    1.47
  10   0   5   11.81    0.86
  10   0   5   10.23    1.30
  11   0   5    0.23    0.32
  11   0   5    0.08    0.36
  11   0   5   -0.11    0.48
  11   0   5    0.48    0.62
  12   0   5   19.66    1.24
 -13  -1   5    4.23    0.63
  13  -1  -5    3.92    0.63
 -13  -1   5    5.75    0.77
 -13   1   5    5.54    0.50
  13   1  -5    3.56    0.72
  13   1  -5    3.75    0.56
  13   1  -5    3.01    0.56
  12  -1  -5    3.51    0.81
 -12   1   5    3.33    0.54
  12   1  -5    3.03    0.66
  12   1  -5    5.17    0.99
  12   1  -5    2.78    0.54
  12   1  -5    3.80    0.70
 -11  -1   5   16.59    1.30
  11  -1  -5   17.45    1.23
  11   1  -5   16.60    1.58
 -11   1   5   15.83    1.20
  11   1  -5   15.32    1.36
  11   1  -5   17.06    1.44
  11   1  -5   15.63    1.11
  10  -1  -5   11.77    1.31
 -10  -1   5   12.01    1.24
 -10   1   5   12.26    1.17
  10   1  -5   13.12    1.11
  10   1  -5   12.35    1.32
  10   1  -5   13.63    1.40
  10   1  -5   12.45    1.41
  -9  -1   5   15.70    1.38
   9  -1  -5   17.31    1.55
   9   1  -5   15.00    1.25
   9   1  -5   14.43    1.58
   9   1  -5   13.76    0.96
   9   1  -5   11.64    1.56
   9   1  -5   16.71    1.61
  -9   1   5   14.03    1.30
  -8  -1   5   10.82    1.25
   8  -1  -5    8.79    1.85
   8   1  -5    6.16    1.70
   7  -1  -5   52.92    3.72
  -7  -1   5   50.32    3.27
  -7  -1   5   49.54    2.80
   7  -1  -5   52.69    2.97
   7   1  -5   48.06    3.60
   6  -1  -5   17.31    1.60
  -6  -1   5   15.86    1.35
   6  -1  -5   16.44    1.31
  -6  -1   5   14.03    1.50
  -6  -1   5   13.54    1.15
  -6  -1   5   15.01    1.23
   6  -1  -5   14.10    1.70
   6   1  -5   17.79    1.47
   6   1  -5   14.14    1.62
  -6   1   5   14.89    1.18
  -6   1   5   14.07    1.19
   5  -1  -5   47.44    3.13
   5  -1  -5   50.21    2.74
  -5  -1   5   49.31    2.51
  -5  -1   5   45.64    2.92
   5  -1  -5   44.90    2.85
   5  -1  -5   48.48    2.79
  -5  -1   5   46.74    2.97
  -5  -1   5   52.36    2.83
  -5  -1   5   50.43    2.53
   5  -1  -5   47.05    3.18
  -5   1   5   46.05    2.54
   5   1  -5   46.54    3.13
  -5   1   5   46.20    2.68
  -5   1   5   45.67    2.35
   5   1  -5   44.25    2.69
  -4  -1   5   50.18    2.63
  -4  -1   5   52.57    3.11
   4  -1  -5   49.96    2.92
   4  -1  -5   52.84    2.86
   4  -1  -5   52.92    2.89
   4  -1  -5   48.84    3.19
  -4  -1   5   50.78    2.96
  -4  -1   5   50.80    3.05
  -4  -1   5   49.74    2.66
  -4   1   5   54.08    2.51
   4   1  -5   54.59    3.27
   4   1  -5   56.10    2.70
  -4   1   5   52.35    3.29
   4   1  -5   58.15    2.92
  -4   1   5   56.57    2.83
  -4   1   5   56.74    2.67
   3  -1  -5   61.20    2.99
  -3  -1   5   56.83    2.83
  -3  -1   5   56.99    2.87
   3  -1  -5   61.25    3.10
  -3  -1   5   62.90    3.30
   3  -1  -5   56.53    3.32
  -3  -1   5   59.14    3.29
  -3  -1   5   59.02    3.20
   3  -1  -5   53.66    2.99
   3  -1  -5   56.95    3.44
   3   1  -5   57.17    3.02
   3   1  -5   57.31    3.37
  -3   1   5   58.31    2.75
  -3   1   5   59.76    2.94
  -3   1   5   59.25    3.49
   3   1  -5   57.44    2.94
  -3   1   5   59.80    2.68
   2  -1  -5   17.20    1.17
  -2  -1   5   17.01    1.24
   2  -1  -5   15.24    1.20
   2  -1  -5   17.19    1.19
   2  -1  -5   17.62    0.94
  -2  -1   5   18.21    1.31
  -2  -1   5   17.90    1.38
   2  -1  -5   18.32    1.40
  -2  -1   5   17.59    1.23
   2  -1  -5   18.15    1.18
  -2  -1   5   17.39    1.12
   2   1  -5   17.84    1.13
   2   1  -5   14.67    1.19
  -2   1   5   18.22    1.17
  -2   1   5   17.11    1.08
  -2   1   5   17.19    1.43
   2   1  -5   16.37    1.25
   2   1  -5   17.58    1.31
  -2   1   5   17.43    1.09
  -1  -1   5  151.91    6.91
   1  -1  -5  136.85    7.86
  -1  -1   5  149.90    7.57
   1  -1  -5  155.97    6.09
  -1  -1   5  153.88    7.86
   1  -1  -5  153.67    6.89
  -1  -1   5  160.82    7.00
   1   1  -5  166.66    7.91
  -1   1   5  164.08    6.84
   1   1  -5  147.54    7.88
   1   1  -5  163.98    7.40
   1   1  -5  166.31    7.03
  -1   1   5  165.51    6.41
  -1   1   5  165.74    6.32
   0  -1  -5   28.57    1.63
   0  -1   5   30.73    1.90
   0  -1   5   29.67    1.82
   0  -1   5   30.59    1.72
   0  -1  -5   31.77    1.40
   0  -1   5   31.31    1.93
   0   1  -5   34.18    1.84
   0   1  -5   29.27    1.75
   0   1   5   32.85    1.67
   0   1  -5   34.11    1.88
   0   1   5   32.60    1.68
   0   1  -5   32.90    1.95
   1  -1   5   12.27    1.16
   1  -1   5   13.47    1.16
  -1   1  -5   18.07    1.29
  -1   1  -5   18.93    1.21
   1   1   5   18.55    1.09
  -1   1  -5   18.63    1.02
  -1   1  -5   19.62    1.30
  -1   1  -5   19.39    1.30
  -1   1  -5   17.90    1.23
  -2  -1  -5   57.75    2.43
  -2  -1  -5   56.41    2.75
   2  -1   5   57.13    3.10
  -2   1  -5   61.65    3.31
  -2   1  -5   59.17    3.37
  -2   1  -5   59.27    2.58
  -2   1  -5   60.51    3.15
  -2   1  -5   59.09    2.96
   3  -1   5   61.45    3.39
  -3  -1  -5   66.16    3.14
  -3  -1  -5   66.22    4.03
  -3  -1  -5   65.60    2.77
  -3   1  -5   66.36    2.90
  -3   1  -5   65.36    3.54
  -3   1  -5   69.90    3.33
  -3   1  -5   66.34    3.85
  -3   1  -5   67.81    3.70
  -4  -1  -5   14.26    0.92
   4  -1   5   14.57    1.46
   4  -1   5   12.87    1.07
  -4  -1  -5   14.13    1.04
  -4   1  -5   15.08    1.30
  -4   1  -5   14.26    1.27
  -4   1  -5   15.08    1.21
  -4   1  -5   15.12    1.00
   5  -1   5  118.34    5.83
  -5  -1  -5  126.65    5.20
  -5  -1  -5  128.39    5.85
  -5   1  -5  136.54    6.78
  -5   1  -5  124.57    6.43
  -5   1  -5  128.61    5.29
   5   1   5  120.53    5.83
  -6  -1  -5   25.71    1.48
  -6  -1  -5   24.91    1.66
   6  -1   5   26.68    1.96
   6   1   5   24.44    1.42
   6   1   5   22.88    1.88
  -6   1  -5   24.13    1.92
   6   1   5   23.44    1.43
   6   1   5   23.80    1.70
   7  -1   5   56.76    3.20
  -7  -1  -5   55.90    2.68
   7   1   5   50.67    2.38
   7   1   5   49.85    3.10
   7   1   5   51.92    2.45
   8  -1   5    2.80    0.49
   8  -1   5    3.92    1.01
  -8  -1  -5    2.63    0.76
   8  -1   5    3.14    0.88
   8   1   5    3.34    0.86
   8   1   5    2.35    0.85
   8   1   5    4.10    0.70
   8   1   5    5.16    0.80
   8   1   5    3.58    0.64
   9  -1   5   30.75    1.94
   9  -1   5   31.95    2.24
  -9  -1  -5   25.81    1.87
   9  -1   5   28.67    2.04
   9   1   5   33.24    1.71
   9   1   5   30.63    1.98
   9   1   5   31.65    1.63
   9   1   5   31.99    2.29
   9   1   5   31.59    1.79
  10  -1   5   13.74    1.51
  10  -1   5   15.04    1.30
 -10  -1  -5   14.67    1.75
  10  -1   5   16.54    1.32
  10   1   5   18.96    1.30
  10   1   5   16.63    1.60
  10   1   5   16.31    1.00
  10   1   5   15.02    1.17
  10   1   5   16.48    1.34
  10   1   5   17.81    1.04
  10   1   5   17.40    1.20
  11  -1   5   14.93    1.41
  11  -1   5   15.75    1.12
  11  -1   5   16.55    0.98
  11  -1   5   14.70    1.39
 -11   1  -5   13.15    1.20
  11   1   5   11.62    0.98
  11   1   5   11.24    1.29
  11   1   5   14.72    1.14
  11   1   5   14.46    1.10
  12  -1   5    4.60    0.71
 -12  -1  -5    5.07    0.69
 -12   1  -5    4.92    0.61
 -12  -2   5   11.10    0.95
  12  -2  -5   11.14    0.77
  12   2  -5   11.31    1.13
  12   2  -5    9.27    0.76
  12   2  -5    9.89    0.83
  12   2  -5   10.35    0.87
  11  -2  -5    0.05    0.51
 -11  -2   5    1.32    0.56
  11   2  -5    1.64    0.50
  11   2  -5    1.15    0.54
  11   2  -5    1.02    0.56
 -11   2   5    1.81    0.45
  11   2  -5    1.01    0.70
 -10  -2   5   35.02    2.08
  10  -2  -5   34.70    2.16
  10   2  -5   33.21    1.87
  10   2  -5   31.07    1.87
  10   2  -5   32.31    2.06
 -10   2   5   33.07    1.65
  10   2  -5   32.65    1.96
  10   2  -5   33.63    2.28
  -9  -2   5    2.96    0.77
  -9  -2   5    1.45    0.92
   9   2  -5    3.92    0.75
  -9   2   5    4.47    0.63
   9   2  -5    3.23    0.78
   9   2  -5    4.17    0.86
   9   2  -5    5.27    1.06
   9   2  -5    4.00    0.77
  -9   2   5    4.15    0.80
  -8  -2   5   11.95    1.28
  -8  -2   5   10.35    1.35
   8   2  -5   10.26    1.36
   8   2  -5   11.43    1.21
   8   2  -5    9.26    1.11
  -8   2   5    9.54    0.93
   8   2  -5    9.53    1.41
   8   2  -5   10.15    1.06
   8   2  -5    5.80    0.96
  -8   2   5    8.59    1.13
  -7  -2   5    0.06    0.55
  -7  -2   5    0.39    0.53
   7  -2  -5    0.60    0.92
   7   2  -5    0.00    0.59
   7   2  -5    1.16    0.97
   7   2  -5    0.75    0.62
   7   2  -5    0.49    0.62
   7   2  -5    0.31    0.43
   6  -2  -5   27.38    2.02
  -6  -2   5   29.44    1.80
   6  -2  -5   27.94    2.56
  -6  -2   5   27.36    1.78
   6  -2  -5   29.08    2.11
   6  -2  -5   28.74    2.17
   6   2  -5   25.73    2.46
  -6   2   5   26.07    2.01
   6   2  -5   28.10    2.04
   6   2  -5   26.56    1.86
   5  -2  -5    1.60    0.69
  -5  -2   5    1.85    0.59
  -5  -2   5    2.20    0.54
   5  -2  -5    1.63    0.84
   5  -2  -5    1.36    0.78
  -5  -2   5    1.79    0.60
   5  -2  -5    3.92    0.89
   5   2  -5    2.09    0.90
   5   2  -5    2.12    0.72
  -5   2   5    1.12    0.54
  -5   2   5    2.23    0.63
   5   2  -5    2.17    0.72
  -4  -2   5   81.10    4.66
  -4  -2   5   80.08    4.46
   4  -2  -5   83.37    4.74
   4  -2  -5   82.04    4.88
  -4  -2   5   83.12    3.98
  -4  -2   5   82.03    3.94
   4  -2  -5   83.92    4.14
   4  -2  -5   87.14    4.12
  -4   2   5   79.69    3.78
  -4   2   5   79.81    4.01
   4   2  -5   83.86    4.18
  -4   2   5   80.51    3.75
   4   2  -5   84.60    4.91
   3  -2  -5   32.93    1.87
  -3  -2   5   34.03    1.84
   3  -2  -5   33.10    1.87
  -3  -2   5   32.47    2.02
   3  -2  -5   31.17    2.12
  -3  -2   5   33.55    1.83
  -3  -2   5   29.69    2.25
   3   2  -5   28.87    1.96
   3   2  -5   31.53    2.32
  -3   2   5   30.33    1.78
  -3   2   5   30.66    1.69
  -3   2   5   29.60    1.79
  -2  -2   5    8.44    1.09
  -2  -2   5    9.76    0.90
   2  -2  -5    8.61    0.61
   2  -2  -5    8.73    0.91
  -2  -2   5    9.40    0.93
   2  -2  -5    9.66    0.81
  -2  -2   5    8.80    0.84
   2  -2  -5    8.84    0.79
  -2   2   5    8.37    1.07
   2   2  -5    7.88    1.04
  -2   2   5    8.72    0.84
  -2   2   5    8.36    0.75
   2   2  -5    8.47    0.95
  -2   2   5    8.21    0.71
   1  -2  -5   23.96    1.35
  -1  -2   5   24.51    1.70
  -1  -2   5   24.22    1.52
  -1  -2   5   22.11    1.71
  -1  -2   5   22.68    1.51
   1   2  -5   28.54    1.74
   1   2  -5   25.63    1.85
  -1   2   5   26.32    1.31
  -1   2   5   25.79    1.52
  -1   2   5   25.95    1.41
   0  -2   5   96.52    4.67
   0  -2   5   92.26    4.82
   0  -2   5   91.33    4.29
   0  -2   5   84.43    4.28
   0   2   5   89.60    3.72
   0   2   5   82.57    3.91
   0   2  -5   91.09    4.30
   0   2  -5   88.58    4.38
   0   2   5   88.29    3.97
   1  -2   5   15.01    1.30
   1  -2   5   14.24    1.14
   1  -2   5   14.76    1.21
   1  -2   5   14.49    1.22
   1   2   5   16.77    0.92
   1   2   5   14.53    0.84
  -1   2  -5   13.49    1.04
  -1   2  -5   14.76    1.27
  -1   2  -5   14.99    1.10
  -2  -2  -5   74.77    3.66
   2  -2   5   88.24    4.63
   2  -2   5   87.80    4.42
  -2   2  -5   87.59    4.23
  -3  -2  -5    8.32    0.63
   3  -2   5    8.30    1.12
   3  -2   5    8.45    0.91
   3  -2   5    6.85    1.01
  -3   2  -5    7.44    0.84
   4  -2   5   81.63    4.17
  -4  -2  -5   83.23    3.82
   4  -2   5   80.71    4.34
   4   2   5   91.55    3.78
   4   2   5   66.53    3.97
  -4   2  -5   86.57    4.32
   5  -2   5   16.49    1.57
   5  -2   5   15.00    1.33
  -5  -2  -5   14.54    1.11
   5   2   5   13.93    1.03
   5   2   5   14.23    1.55
  -5   2  -5   14.36    1.31
   5   2   5   13.86    0.94
   6  -2   5    9.41    1.41
  -6  -2  -5    9.71    0.86
  -6  -2  -5   10.15    0.98
   6   2   5    7.74    1.27
   6   2   5    9.78    0.87
   6   2   5    9.29    0.89
   7  -2   5   26.09    1.76
  -7  -2  -5   26.47    1.61
   7  -2   5   25.88    2.07
   7   2   5   23.83    2.15
   7   2   5   28.41    1.57
   7   2   5   25.17    1.46
  -7   2  -5   29.12    2.04
   7   2   5   24.98    1.64
   7   2   5   26.39    1.44
   8  -2   5   11.80    1.13
   8  -2   5   11.07    1.58
  -8  -2  -5   12.07    1.14
  -8   2  -5   14.83    1.42
   8   2   5   14.31    1.08
   8   2   5   13.89    1.69
   8   2   5   14.95    1.16
   8   2   5   15.32    1.17
   9  -2   5    3.75    0.52
   9  -2   5    4.15    0.99
   9  -2   5    4.62    1.01
  -9   2  -5    2.98    0.73
   9   2   5    4.10    0.66
   9   2   5    4.02    0.72
   9   2   5    4.86    0.71
   9   2   5    3.73    0.99
  10  -2   5   13.52    1.24
  10  -2   5   12.08    1.40
  10   2   5   14.14    1.05
  10   2   5   14.83    1.04
  10   2   5   14.62    1.07
 -10   2  -5   13.35    1.16
  10   2   5   15.14    0.90
  11  -2   5    0.85    0.52
  11  -2   5    1.14    0.39
  11   2   5    0.99    0.43
  11   2   5    1.30    0.40
  11   2   5    0.59    0.41
 -11   2  -5    0.67    0.38
  11  -3  -5   12.29    1.11
 -11  -3   5   11.90    1.09
  11   3  -5   11.48    1.15
  11   3  -5   13.29    0.98
 -11   3   5   12.49    1.13
  11   3  -5   14.06    1.12
  10  -3  -5    2.42    0.79
 -10  -3   5    3.15    0.74
  10   3  -5    2.69    0.67
  10   3  -5    2.02    0.60
  10   3  -5    2.01    0.54
 -10   3   5    2.00    0.69
  10   3  -5    3.38    0.73
  10   3  -5    0.91    0.53
 -10   3   5    2.94    0.69
  10   3  -5    2.18    0.48
  -9  -3   5   20.80    1.62
  -9  -3   5   19.24    1.73
   9   3  -5   19.25    1.31
   9   3  -5   18.78    1.59
   9   3  -5   17.88    1.44
  -9   3   5   16.59    1.49
   9   3  -5   18.90    1.42
  -9   3   5   17.81    1.46
   9   3  -5   18.25    1.31
   9   3  -5   18.31    1.76
   9   3  -5   17.44    1.35
  -8  -3   5    6.60    1.09
  -8  -3   5    6.50    1.03
   8   3  -5    6.32    0.80
   8   3  -5    7.04    0.99
  -8   3   5    5.37    1.02
  -8   3   5    6.13    0.87
   8   3  -5    6.63    0.96
   8   3  -5    6.30    0.86
   8   3  -5    6.57    1.05
  -8   3   5    5.94    0.95
   8   3  -5    7.77    1.26
   8   3  -5    7.32    0.95
   7  -3  -5   82.28    4.61
  -7  -3   5   90.01    4.38
  -7  -3   5   84.18    4.34
  -7  -3   5   87.66    4.38
   7  -3  -5   86.13    4.88
   7   3  -5   86.08    4.36
   7   3  -5   86.04    3.60
   7   3  -5   77.30    4.11
   7   3  -5   87.15    3.71
   7   3  -5   89.15    3.67
   7   3  -5   88.77    3.98
  -7   3   5   81.51    4.00
   7   3  -5   75.55    3.82
   6  -3  -5    1.59    0.84
  -6  -3   5    2.37    0.67
  -6  -3   5    0.68    0.61
   6  -3  -5    1.78    0.87
   6  -3  -5    1.94    0.86
   6   3  -5    2.08    0.50
  -6   3   5    2.10    0.51
  -6   3   5    1.80    0.53
   6   3  -5    3.26    0.78
   6   3  -5    3.26    0.77
   6   3  -5    1.51    0.72
  -6   3   5    1.62    0.64
  -6   3   5    2.14    0.74
   6   3  -5    1.98    0.77
  -6   3   5    1.73    0.68
   6   3  -5    1.86    0.55
   5  -3  -5   12.98    1.36
   5  -3  -5   13.24    1.37
  -5  -3   5   13.51    1.21
  -5  -3   5   14.35    1.24
   5   3  -5   13.04    1.03
   5   3  -5   13.39    1.11
   5   3  -5   12.56    1.38
  -5   3   5   11.74    1.17
   5   3  -5   13.20    1.79
   5   3  -5   15.56    2.17
  -5   3   5   13.46    1.14
  -5   3   5   13.32    2.07
   5   3  -5   13.08    1.40
  -5   3   5   13.64    1.23
  -5   3   5   13.51    1.17
  -4  -3   5    0.58    0.52
   4  -3  -5    0.91    0.64
   4  -3  -5    0.34    0.46
  -4  -3   5    0.71    0.44
   4  -3  -5    0.21    0.48
   4   3  -5    0.24    0.48
  -4   3   5    0.89    0.33
   4   3  -5    1.25    1.14
  -4   3   5    0.47    0.46
  -4   3   5    1.08    0.43
   4   3  -5    0.53    0.55
   4   3  -5    0.62    0.54
   4   3  -5    0.29    0.78
  -4   3   5    0.39    0.85
   3  -3  -5   99.94    4.82
  -3  -3   5  104.23    4.82
  -3  -3   5  104.51    4.84
   3  -3  -5  102.07    4.79
  -3  -3   5  100.27    5.47
   3   3  -5  113.61    6.73
   3   3  -5   95.06    4.97
  -3   3   5   99.99    4.44
  -3   3   5   95.12    4.65
   3   3  -5   93.13    5.88
  -3   3   5   96.64    6.46
   2  -3  -5    6.02    0.66
  -2  -3   5    4.94    0.91
  -2  -3   5    6.33    0.86
  -2  -3   5    5.54    0.79
   2  -3  -5    6.27    0.58
   2  -3  -5    6.28    0.69
  -2   3   5    5.09    0.61
   2   3  -5    4.02    1.07
  -2   3   5    4.91    0.61
  -2   3   5    4.33    0.88
   2   3  -5    4.26    0.83
  -1  -3   5   28.31    1.79
  -1  -3   5   27.54    2.00
  -1  -3   5   28.13    1.80
  -1   3   5   28.61    1.45
   1   3  -5   29.25    1.97
  -1   3   5   26.66    1.49
  -1   3   5   26.87    1.75
   1   3  -5   28.34    2.26
   0  -3   5    0.43    0.45
   0  -3   5   -0.39    0.46
   0  -3   5    0.65    0.62
   0  -3   5    0.07    0.53
   0   3  -5    0.83    0.56
   0   3   5    0.43    0.46
   0   3   5    0.38    0.23
   1  -3   5   31.23    2.00
   1  -3   5   30.01    1.96
   1  -3   5   29.63    2.22
   1  -3   5   26.14    2.05
   1  -3   5   28.63    2.06
   1   3   5   31.00    1.40
  -1   3  -5   32.10    1.88
  -1   3  -5   30.47    2.14
   2  -3   5    6.45    1.17
   2  -3   5    5.90    1.01
   2  -3   5    8.07    1.27
   2  -3   5    5.29    0.92
   2  -3   5    7.02    1.02
  -2   3  -5    4.69    0.97
   3  -3   5   27.61    2.08
   3  -3   5   26.53    2.02
   3   3   5   28.05    1.21
   4  -3   5    6.69    1.25
   4   3   5    5.36    0.55
   5  -3   5    8.08    1.14
  -5  -3  -5   10.39    0.92
   5  -3   5    9.91    1.44
   5   3   5    9.78    0.74
   5   3   5    7.10    1.36
  -5   3  -5   13.37    1.22
   6  -3   5   16.04    1.65
  -6  -3  -5   12.61    1.13
   6  -3   5   13.67    1.61
   6   3   5   13.14    0.95
  -6   3  -5   11.52    1.17
   6   3   5   12.38    1.13
   6   3   5   12.98    0.88
  -7  -3  -5   82.03    3.62
   7  -3   5   80.46    4.27
   7  -3   5   82.57    3.81
   7   3   5   80.77    3.19
   7   3   5   81.52    3.23
  -7   3  -5   81.81    3.58
   7   3   5   71.04    4.30
   8  -3   5    3.01    0.97
   8  -3   5    3.39    0.68
  -8   3  -5    4.85    0.72
   8   3   5    5.70    0.67
   8   3   5    4.69    0.79
   8   3   5    4.59    1.15
   9  -3   5    7.74    1.18
   9  -3   5    8.96    0.86
   9   3   5    9.56    0.80
   9   3   5    7.81    0.92
  -9   3  -5    9.01    0.84
   9   3   5    7.80    0.76
   9   3   5    5.76    1.13
  10  -3   5    1.72    0.57
  10   3   5    0.61    0.41
 -10   3  -5    0.74    0.31
  10   3   5    1.05    0.35
  10   3   5    0.62    0.34
  10  -4  -5   18.20    1.43
 -10  -4   5   17.79    1.35
  10   4  -5   16.23    1.16
  10   4  -5   18.59    1.20
 -10   4   5   18.99    1.21
 -10   4   5   19.65    1.13
  10   4  -5   17.20    1.13
  -9  -4   5    1.38    0.64
  -9   4   5    0.50    0.40
   9   4  -5    0.14    0.42
   9   4  -5    0.74    0.50
  -9   4   5    0.86    0.41
   9   4  -5    0.72    0.51
  -9   4   5    0.66    0.53
   9   4  -5    0.66    0.54
  -8  -4   5   42.50    2.70
  -8  -4   5   45.68    2.70
  -8   4   5   46.63    2.36
   8   4  -5   49.40    2.56
   8   4  -5   47.24    2.23
  -8   4   5   39.70    2.49
   8   4  -5   44.27    2.41
   8   4  -5   49.32    2.32
  -8   4   5   47.65    2.18
   7  -4  -5    0.88    0.75
   7  -4  -5    0.60    0.86
  -7  -4   5   -0.06    0.70
   7   4  -5    0.69    0.65
  -7   4   5   -0.47    0.56
  -7   4   5    0.25    0.64
   7   4  -5    0.70    0.39
   7   4  -5   -0.06    0.46
  -7   4   5    0.35    0.39
   7   4  -5    0.10    0.48
  -7   4   5    0.35    0.56
   7   4  -5   -0.19    0.43
  -7   4   5    0.37    0.36
  -6  -4   5   19.74    1.59
   6  -4  -5   20.47    1.99
   6  -4  -5   18.23    1.76
   6   4  -5   16.33    1.35
   6   4  -5   16.56    1.31
  -6   4   5   15.57    2.29
   6   4  -5   15.58    1.20
  -6   4   5   18.05    1.42
   6   4  -5   17.12    1.20
   6   4  -5   18.16    1.66
  -6   4   5   16.67    1.23
  -6   4   5   17.61    1.38
  -6   4   5   17.77    1.15
   5  -4  -5    1.38    0.77
   5  -4  -5    2.88    0.86
  -5  -4   5    1.00    0.72
  -5  -4   5    1.49    0.73
   5   4  -5    1.07    1.01
   5   4  -5    1.65    0.83
  -5   4   5    1.99    0.61
   5   4  -5    1.37    0.61
  -5   4   5    1.85    0.54
  -5   4   5    0.87    0.99
  -5   4   5    2.74    0.49
   5   4  -5    1.91    0.63
  -5   4   5    1.80    0.44
  -5   4   5    1.06    0.57
   5   4  -5    1.91    0.53
   5   4  -5    1.79    0.58
   4  -4  -5   33.40    2.27
  -4  -4   5   36.55    2.21
   4  -4  -5   33.64    2.22
  -4  -4   5   35.42    2.18
   4   4  -5   33.89    3.20
   4   4  -5   32.70    1.74
   4   4  -5   36.06    1.91
  -4   4   5   32.81    1.78
   4   4  -5   30.18    2.24
  -4   4   5   32.37    1.99
  -4   4   5   32.81    1.83
  -4   4   5   32.27    1.66
  -4   4   5   31.24    1.54
  -4   4   5   36.82    3.32
   4   4  -5   31.81    2.01
   4   4  -5   30.69    1.83
  -3  -4   5    0.56    0.58
   3  -4  -5    0.09    0.45
  -3  -4   5    0.55    0.64
   3  -4  -5    0.48    0.54
   3   4  -5    1.27    0.55
   3   4  -5    0.22    0.56
   3   4  -5    0.94    0.41
   3   4  -5    0.67    0.65
  -3   4   5    0.38    0.36
  -3   4   5    1.11    0.40
  -3   4   5    0.96    0.30
  -3   4   5    0.68    0.41
   3   4  -5    1.08    0.97
   3   4  -5    0.55    0.48
  -3   4   5    0.93    0.43
  -3   4   5    1.55    1.10
   2  -4  -5   47.30    2.58
  -2  -4   5   47.75    2.74
   2  -4  -5   45.83    2.55
  -2  -4   5   47.56    2.77
   2   4  -5   51.38    3.98
  -2   4   5   46.06    2.07
   2   4  -5   45.11    2.29
  -2   4   5   43.99    3.78
   2   4  -5   44.61    2.22
   2   4  -5   46.07    2.34
   2   4  -5   47.07    2.52
  -2   4   5   47.79    2.16
  -2   4   5   46.99    2.38
  -1  -4   5    0.45    0.48
   1  -4  -5    0.61    0.39
  -1  -4   5    1.46    0.71
   1   4  -5   -0.05    0.41
   1   4  -5    0.23    0.48
  -1   4   5    0.45    0.31
  -1   4   5    0.93    0.93
  -1   4   5    0.34    0.35
   1   4  -5    0.45    0.81
   1   4  -5    1.17    0.56
  -1   4   5    0.76    0.33
   1   4  -5    0.42    0.57
   0  -4   5   36.77    2.31
   0  -4   5   31.34    2.39
   0  -4   5   33.32    2.28
   0   4  -5   32.63    1.91
   0   4  -5   35.21    2.12
   0   4  -5   34.47    1.87
   0   4   5   31.56    1.46
   0   4   5   32.17    3.05
   0   4  -5   36.55    2.17
   0   4   5   32.31    1.65
   0   4  -5   33.44    1.97
   0   4  -5   34.24    3.11
   1  -4   5   11.93    1.65
   1  -4   5    8.07    1.30
   1  -4   5   10.03    1.24
   1  -4   5    8.99    1.18
  -1   4  -5    9.37    1.06
  -1   4  -5    8.50    0.99
  -1   4  -5   10.71    1.18
  -1   4  -5    8.98    1.17
   1   4   5    8.36    0.66
  -1   4  -5    8.58    1.02
  -1   4  -5    9.59    1.68
   2  -4   5   58.28    3.38
   2  -4   5   50.84    3.32
   2  -4   5   55.05    3.27
   2  -4   5   60.87    3.41
   2  -4   5   61.04    3.40
  -2   4  -5   55.06    2.76
  -2   4  -5   53.96    2.99
  -2   4  -5   56.34    2.95
  -2   4  -5   56.96    4.33
  -2   4  -5   54.62    2.75
   3  -4   5   13.08    1.55
   3  -4   5   13.79    1.49
   3  -4   5   13.05    1.50
  -3   4  -5   12.33    1.84
  -3   4  -5   12.62    1.30
  -3   4  -5   11.41    1.32
  -3   4  -5   13.85    1.50
   4  -4   5   14.82    1.84
   4  -4   5   11.95    1.48
  -4   4  -5   11.50    1.44
  -4   4  -5   12.06    1.27
  -4   4  -5   12.04    1.34
   5  -4   5    3.83    1.11
   5  -4   5    5.03    0.97
  -5   4  -5    6.00    0.82
   5   4   5    3.86    0.81
  -5   4  -5    4.91    1.07
   6  -4   5   21.20    1.97
   6   4   5   24.07    1.50
  -6   4  -5   24.18    1.56
   7  -4   5    6.26    1.18
   7  -4   5    7.75    1.06
   7   4   5    5.91    0.81
   8  -4   5    6.36    0.83
   8   4   5    5.44    1.12
   8   4   5    6.15    0.82
   8   4   5    7.32    0.67
   9  -4   5    1.88    0.40
   9   4   5    2.31    0.39
   9   4   5    1.74    0.49
  -9  -5   5   17.98    1.31
  -9   5   5   20.51    1.07
   9   5  -5   18.10    1.18
   9   5  -5   19.50    1.10
  -8  -5   5    1.76    0.64
  -8   5   5    0.30    0.49
  -8   5   5    1.22    0.50
   8   5  -5    1.35    0.40
   8   5  -5    0.48    0.42
   8   5  -5    1.70    0.55
   7  -5  -5    6.05    0.99
  -7  -5   5    9.64    1.18
  -7   5   5    7.15    0.88
  -7   5   5    5.61    0.91
   7   5  -5    8.55    0.88
   7   5  -5    7.78    0.78
  -7   5   5    6.52    0.93
  -6  -5   5    5.26    1.00
   6  -5  -5    5.96    1.11
   6  -5  -5    7.45    1.39
   6   5  -5    4.71    0.64
  -6   5   5    3.99    0.77
  -6   5   5    6.32    0.83
   6   5  -5    4.89    0.75
   6   5  -5    5.12    0.69
  -6   5   5    4.23    0.83
   5  -5  -5   26.15    2.12
  -5  -5   5   25.20    1.94
   5   5  -5   28.41    1.82
   5   5  -5   29.37    1.61
  -5   5   5   26.90    1.68
   5   5  -5   29.83    1.69
   5   5  -5   31.27    2.90
  -5   5   5   26.60    2.96
  -5   5   5   30.32    1.66
   4  -5  -5    3.08    0.93
  -4  -5   5    3.31    0.89
   4   5  -5    4.17    0.74
   4   5  -5    2.78    0.56
   4   5  -5    3.13    0.75
  -4   5   5    3.46    1.41
  -4   5   5    2.40    0.55
   4   5  -5    2.25    1.13
  -4   5   5    2.13    0.58
   3  -5  -5    9.98    1.21
  -3  -5   5    9.67    1.28
   3   5  -5   10.61    1.91
  -3   5   5    8.18    0.90
   3   5  -5    9.80    0.78
   3   5  -5    8.83    0.96
  -3   5   5   11.32    2.10
  -3   5   5    9.88    0.86
   3   5  -5    9.29    1.25
   3   5  -5    9.03    0.74
   3   5  -5    9.41    1.03
   2  -5  -5    2.51    0.76
  -2  -5   5    2.35    0.84
  -2  -5   5    2.60    0.99
  -2   5   5    2.86    1.23
  -2   5   5    1.45    0.47
   2   5  -5    1.36    0.97
   2   5  -5    1.89    0.77
   2   5  -5    2.61    0.61
   2   5  -5    2.41    0.52
   2   5  -5    1.24    0.49
   2   5  -5    2.41    0.48
  -2   5   5    2.03    0.45
  -1  -5   5   28.02    2.34
  -1  -5   5   28.79    2.15
   1   5  -5   29.16    1.65
  -1   5   5   27.73    1.36
   1   5  -5   27.67    2.91
  -1   5   5   28.03    1.49
   1   5  -5   27.93    1.53
  -1   5   5   28.27    2.97
   1   5  -5   27.76    1.68
   1   5  -5   27.30    1.95
   1   5  -5   30.39    1.77
   0  -5   5   -0.65    0.69
   0  -5   5    0.13    0.75
   0  -5   5    2.07    0.88
   0   5  -5    0.19    0.41
   0   5  -5   -0.17    0.40
   0   5  -5    0.23    0.67
   0   5   5    0.48    0.30
   0   5  -5    0.87    0.59
   0   5   5   -0.01    0.96
   0   5  -5    0.28    0.39
   0   5  -5    0.09    0.38
   1  -5   5   15.41    1.78
   1  -5   5   17.49    1.74
   1  -5   5   14.10    1.77
  -1   5  -5   17.12    1.35
  -1   5  -5   18.60    1.42
  -1   5  -5   18.95    1.63
  -1   5  -5   18.85    1.38
  -1   5  -5   19.11    1.29
  -1   5  -5   17.70    1.68
  -1   5  -5   18.23    2.24
   2  -5   5    0.75    0.83
   2  -5   5    0.19    0.72
   2  -5   5    0.98    0.88
  -2   5  -5   -0.57    0.56
  -2   5  -5    0.32    0.70
  -2   5  -5    0.38    0.47
  -2   5  -5    1.01    0.56
  -2   5  -5    0.53    0.65
  -2   5  -5    1.03    0.49
  -2   5  -5    0.70    0.46
   3  -5   5    9.34    1.50
   3  -5   5    9.01    1.30
  -3   5  -5    8.15    1.09
  -3   5  -5    9.33    1.36
  -3   5  -5    8.86    1.01
  -3   5  -5    9.74    1.86
  -3   5  -5    7.71    0.96
   4  -5   5    4.36    1.13
   4  -5   5    5.27    1.02
  -4   5  -5    5.14    0.74
  -4   5  -5    4.84    0.80
  -4   5  -5    5.57    1.04
  -4   5  -5    5.51    0.81
   5  -5   5   12.78    1.28
  -5   5  -5   12.70    1.23
  -5   5  -5   11.05    1.10
  -5   5  -5   11.93    1.15
  -5   5  -5   11.23    1.42
  -6   5  -5    4.12    0.65
  -6   5  -5    3.66    0.89
  -6   5  -5    4.99    0.83
   7  -5   5    4.91    0.74
  -7   5  -5    2.58    0.69
  -7   5  -5    4.37    0.65
  -7   5  -5    4.16    0.69
  -8   5  -5    0.70    0.32
  -8   5  -5    0.51    0.42
  -8   5  -5    0.42    0.30
  -6  -6   5   20.38    1.46
  -6   6   5   16.60    1.22
  -6   6   5   16.58    1.32
  -6   6   5   19.44    1.07
   6   6  -5   18.52    1.25
   6   6  -5   21.43    1.15
   5  -6  -5    3.91    0.83
  -5  -6   5    4.85    0.91
   5   6  -5    4.60    0.70
   5   6  -5    3.56    0.56
   5   6  -5    1.54    0.42
  -5   6   5    3.01    0.54
  -5   6   5    3.01    0.48
  -5   6   5    2.33    0.62
  -4  -6   5   10.50    1.46
  -4  -6   5   10.94    1.40
   4   6  -5   12.02    1.75
   4   6  -5   13.17    0.97
  -4   6   5   12.98    1.00
   4   6  -5   12.61    0.99
  -4   6   5   14.06    0.87
  -3  -6   5    1.80    0.79
  -3  -6   5    2.44    0.86
   3   6  -5    3.01    1.11
   3   6  -5    2.53    0.57
  -3   6   5    2.41    0.49
  -3   6   5    2.61    1.10
  -3   6   5    2.45    0.42
   3   6  -5    2.11    0.53
  -2  -6   5   11.53    1.61
  -2  -6   5   12.36    1.51
  -2   6   5   14.18    0.97
   2   6  -5   13.13    1.37
  -2   6   5   14.03    0.79
   2   6  -5   13.24    1.06
   2   6  -5   13.50    1.05
   2   6  -5   13.95    1.89
  -1  -6   5    1.60    0.86
  -1  -6   5    0.99    0.75
   1   6  -5    1.60    0.47
   1   6  -5    1.56    0.51
   1   6  -5    1.81    0.66
  -1   6   5    1.92    0.44
  -1   6   5    1.91    1.18
   1   6  -5    1.74    0.89
   1   6  -5    2.21    0.55
   0  -6   5    6.27    1.12
   0  -6   5    7.29    1.24
   0  -6   5    8.18    1.16
   0   6  -5    6.02    1.40
   0   6   5    6.72    0.65
   0   6   5    5.08    1.44
   0   6  -5    7.00    0.85
   0   6  -5    7.29    1.00
   0   6  -5    6.01    0.83
   0   6  -5    7.76    0.88
   1  -6   5    2.09    0.66
   1  -6   5    0.13    0.82
  -1   6  -5    0.48    0.48
  -1   6  -5    1.28    0.44
  -1   6  -5    1.37    0.53
  -1   6  -5    0.64    0.58
  -1   6  -5    1.08    0.81
   2  -6   5   13.66    1.30
  -2   6  -5   13.11    1.10
  -2   6  -5   10.99    1.08
  -2   6  -5   11.43    1.07
  -2   6  -5   11.35    1.70
  -2   6  -5   12.93    1.11
   3  -6   5    1.65    0.62
  -3   6  -5    1.89    0.46
  -3   6  -5    0.19    0.46
  -3   6  -5    1.30    0.51
  -3   6  -5    1.69    0.89
   4  -6   5    4.11    0.66
  -4   6  -5    2.77    0.57
  -4   6  -5    4.58    0.59
  -5   6  -5    0.01    0.29
  13   0  -6    2.62    0.58
  13   0  -6    3.35    0.48
 -13   0   6    5.35    0.61
 -12   0   6    1.25    0.54
  12   0  -6    2.02    0.59
  11   0  -6   41.34    2.59
 -11   0   6   41.73    2.21
 -10   0   6    0.23    0.59
  10   0  -6   -0.07    0.77
  10   0  -6   -0.28    0.43
   9   0  -6   12.62    1.20
  -9   0   6   12.11    1.41
   7   0  -6    5.35    1.31
  -6   0   6    1.46    0.65
   6   0  -6    1.97    0.83
   6   0  -6    1.32    0.50
  -5   0   6   40.35    2.44
   5   0  -6   40.58    2.54
   5   0  -6   41.28    2.35
   5   0  -6   36.86    2.68
   4   0  -6   10.58    0.96
  -4   0   6    9.83    1.15
   4   0  -6   11.29    1.10
  -4   0   6   10.61    0.88
   4   0  -6   10.94    1.11
  -4   0   6   12.69    1.07
   3   0  -6   68.45    3.64
   3   0  -6   64.99    3.45
   3   0  -6   74.13    3.95
  -3   0   6   73.26    3.62
  -3   0   6   68.92    3.56
  -3   0   6   70.23    3.05
  -3   0   6   70.32    4.06
   2   0  -6   41.67    2.40
   2   0  -6   41.99    1.97
  -2   0   6   44.44    2.32
  -2   0   6   41.25    2.03
   2   0  -6   42.03    2.29
  -2   0   6   42.82    2.70
   2   0  -6   46.01    2.62
  -2   0   6   43.52    2.38
   1   0  -6  132.46    5.40
   1   0  -6  138.63    6.99
   1   0  -6  133.53    6.53
  -1   0   6  135.60    6.12
   1   0  -6  138.36    6.12
   0   0  -6    5.86    0.58
   0   0   6    6.10    0.75
   0   0  -6    5.59    0.79
   0   0  -6    6.31    0.70
   0   0  -6    5.22    0.69
  -1   0  -6   36.58    1.75
  -1   0  -6   34.76    2.16
  -1   0  -6   39.16    2.06
  -1   0  -6   38.69    2.31
  -2   0  -6   21.09    1.35
  -2   0  -6   18.83    1.12
  -2   0  -6   20.34    1.50
  -2   0  -6   19.00    1.43
  -3   0  -6   84.61    3.88
  -3   0  -6   79.05    3.39
  -3   0  -6   66.79    4.56
  -3   0  -6   82.49    4.39
  -4   0  -6    6.72    0.88
  -4   0  -6    8.94    0.77
   4   0   6    7.92    1.22
  -4   0  -6    6.50    0.93
   5   0   6   25.64    1.99
  -5   0  -6   23.37    1.89
  -5   0  -6   27.14    1.76
  -5   0  -6   24.80    1.50
   6   0   6   -0.52    0.53
  -6   0  -6    0.31    0.40
   6   0   6    0.32    0.66
  -6   0  -6   -0.34    0.44
   6   0   6   -0.02    0.51
   7   0   6   21.18    1.87
   7   0   6   20.01    1.48
   7   0   6   18.81    1.94
   7   0   6   18.82    1.43
   7   0   6   18.55    1.50
  -7   0  -6   18.91    1.43
   8   0   6    6.81    0.88
  -8   0  -6    7.71    1.04
   8   0   6    5.82    1.16
   8   0   6    7.36    0.95
   8   0   6    8.98    1.09
   8   0   6    6.55    1.16
   9   0   6   40.35    2.58
   9   0   6   41.88    2.09
   9   0   6   42.00    2.65
   9   0   6   42.01    2.07
  10   0   6    0.48    0.40
  10   0   6    0.63    0.60
  10   0   6   -0.04    0.62
  11   0   6    4.55    0.53
  11   0   6    5.17    0.55
  11   0   6    4.92    0.70
 -12  -1   6   17.23    1.41
 -12  -1   6   15.62    1.34
  12  -1  -6   15.87    1.50
 -12   1   6   17.83    1.05
  12   1  -6   16.64    1.11
  12   1  -6   18.83    1.33
  12   1  -6   17.25    1.72
  12   1  -6   19.45    1.40
  11  -1  -6    1.06    0.46
  11   1  -6    1.04    0.60
  11   1  -6    0.19    0.60
 -11   1   6    0.23    0.43
  11   1  -6    2.20    0.69
 -10  -1   6    2.63    0.71
  10  -1  -6    2.71    0.75
  10   1  -6    2.97    0.91
 -10   1   6    2.65    0.59
  10   1  -6    2.91    0.60
  10   1  -6    2.59    0.77
  10   1  -6    3.35    0.81
   9  -1  -6    5.61    1.03
  -9  -1   6    5.66    0.92
  -9   1   6    6.18    0.83
   9   1  -6    7.23    1.18
   9   1  -6    6.02    0.85
   9   1  -6    5.79    0.67
  -8  -1   6   58.51    3.02
   8   1  -6   56.28    3.25
  -8   1   6   56.17    2.75
   8   1  -6   53.52    2.57
  -8   1   6   50.45    2.67
   8   1  -6   59.76    2.76
   7  -1  -6    1.31    1.10
   7   1  -6    0.60    0.85
  -6  -1   6   71.06    3.97
   6  -1  -6   73.28    4.24
   6  -1  -6   69.95    3.84
  -6  -1   6   67.82    4.04
   6  -1  -6   72.10    4.49
   6   1  -6   61.71    4.29
   5  -1  -6   24.67    2.02
   5  -1  -6   29.80    2.20
   5  -1  -6   28.55    1.90
  -5  -1   6   29.98    1.95
  -5  -1   6   27.74    2.01
  -5   1   6   24.36    1.88
  -5   1   6   26.67    1.66
   5   1  -6   28.77    1.63
   5   1  -6   27.01    2.19
   4  -1  -6   46.14    3.26
   4  -1  -6   46.52    2.88
  -4  -1   6   50.78    3.01
   4  -1  -6   51.69    2.94
  -4  -1   6   50.07    3.05
   4  -1  -6   47.60    3.00
  -4   1   6   56.39    2.75
  -4   1   6   58.23    2.61
  -4   1   6   55.00    2.91
   4   1  -6   55.76    2.77
   4   1  -6   56.26    3.29
   3  -1  -6   11.09    1.31
  -3  -1   6   14.31    1.25
  -3  -1   6   14.21    1.15
   3  -1  -6   13.04    1.27
   3  -1  -6   14.58    1.23
   3  -1  -6   13.17    1.12
  -3   1   6   16.07    1.14
   3   1  -6   14.73    1.26
   3   1  -6   14.26    1.04
   3   1  -6   14.50    1.25
  -3   1   6   13.05    1.03
  -3   1   6   14.22    1.40
  -3   1   6   13.94    1.16
  -2  -1   6   84.35    4.44
  -2  -1   6   79.63    4.50
   2  -1  -6   77.60    4.02
   2  -1  -6   84.05    3.46
   2  -1  -6   70.53    4.07
  -2  -1   6   79.56    4.34
  -2   1   6   92.47    3.71
   2   1  -6   89.28    4.22
  -2   1   6   87.77    4.81
  -2   1   6   87.24    4.01
   2   1  -6   87.00    4.20
  -2   1   6   84.14    3.74
  -1  -1   6   14.55    1.21
   1  -1  -6   10.57    1.19
   1  -1  -6   12.28    1.07
   1  -1  -6   14.35    0.84
   1  -1  -6   13.09    1.15
  -1  -1   6   14.52    1.15
  -1  -1   6   16.08    1.23
   1   1  -6   14.18    1.20
  -1   1   6   14.26    1.05
   1   1  -6   13.58    1.06
  -1   1   6   12.92    1.31
  -1   1   6   14.81    1.06
   0  -1   6   36.84    2.11
   0  -1  -6   32.52    1.87
   0  -1   6   32.69    2.10
   0  -1  -6   36.49    1.58
   0  -1   6   35.92    2.05
   0   1  -6   31.56    1.94
   0   1  -6   29.57    2.09
   0   1  -6   34.32    2.00
   0   1   6   34.55    1.86
   1  -1   6   10.19    1.00
  -1  -1  -6   11.22    0.73
  -1  -1  -6   10.02    0.84
  -1   1  -6    9.76    1.02
  -1   1  -6   10.34    1.01
  -1   1  -6   11.41    0.84
   1   1   6   10.93    0.87
  -1   1  -6   11.54    1.00
   2  -1   6   56.89    3.10
  -2  -1  -6   64.00    2.53
  -2  -1  -6   61.78    2.86
  -2  -1  -6   51.00    3.30
  -2   1  -6   55.77    3.01
  -2   1  -6   59.84    3.19
  -2   1  -6   59.94    2.62
  -2   1  -6   53.18    3.30
  -3  -1  -6    7.67    0.66
   3  -1   6    7.65    1.11
   3  -1   6    5.52    0.74
  -3  -1  -6    5.82    0.69
  -3   1  -6    5.05    0.66
  -3   1  -6    4.91    0.82
  -3   1  -6    4.42    0.82
  -3   1  -6    5.59    0.80
  -4  -1  -6   58.72    2.59
   4  -1   6   56.02    3.15
  -4  -1  -6   56.46    2.91
  -4   1  -6   55.14    3.25
  -4   1  -6   53.90    3.38
  -4   1  -6   57.48    2.66
   4   1   6   56.85    3.17
  -5  -1  -6   11.41    1.08
  -5  -1  -6   12.09    1.37
  -5  -1  -6   11.21    0.92
   5  -1   6   12.03    1.37
   5   1   6    8.41    0.89
  -5   1  -6    9.29    0.93
  -5   1  -6    8.64    1.15
   5   1   6   10.94    1.45
  -6  -1  -6   48.68    2.43
  -6  -1  -6   46.97    2.72
   6  -1   6   52.40    2.97
   6   1   6   48.11    2.95
   6   1   6   46.15    2.26
   6   1   6   47.38    2.21
   6   1   6   46.61    2.24
   7  -1   6    2.93    0.92
   7  -1   6    4.90    0.61
   7  -1   6    4.08    1.00
  -7  -1  -6    4.21    0.77
   7   1   6    4.32    0.72
   7   1   6    4.81    1.07
   7   1   6    2.27    0.82
   7   1   6    3.86    0.63
   7   1   6    3.26    0.62
  -8  -1  -6   19.36    1.50
   8  -1   6   20.65    1.66
   8  -1   6   23.02    1.92
   8  -1   6   20.59    1.70
   8   1   6   21.15    1.43
   8   1   6   22.60    1.45
   8   1   6   23.39    1.92
   8   1   6   23.35    1.33
   8   1   6   22.15    1.71
   9  -1   6    2.48    0.70
   9  -1   6    2.43    0.70
   9  -1   6    2.61    0.83
   9   1   6    1.71    0.79
   9   1   6    2.76    0.62
   9   1   6    1.90    0.60
   9   1   6    1.46    0.57
   9   1   6    2.12    0.46
  10  -1   6   13.32    1.38
  10  -1   6    9.90    0.97
  10  -1   6    9.41    1.25
  10  -1   6   10.00    1.05
  10   1   6   14.12    1.04
  10   1   6   11.56    1.06
  10   1   6   11.01    1.05
  10   1   6   12.84    1.01
  10   1   6   14.51    1.43
  11  -1   6    1.99    0.45
  11  -1   6    0.90    0.52
  11   1   6    1.41    0.50
  11   1   6    1.43    0.38
 -11   1  -6    1.63    0.54
  12  -2  -6    0.15    0.30
  12   2  -6    0.54    0.49
  12   2  -6    0.62    0.34
  12   2  -6    0.36    0.33
 -11  -2   6   21.55    1.45
  11  -2  -6   20.34    1.42
  11   2  -6   21.15    1.52
  11   2  -6   20.80    1.40
  11   2  -6   19.46    1.67
  11   2  -6   19.96    1.24
 -10  -2   6    9.17    1.09
  10  -2  -6   11.01    1.30
  10   2  -6    8.79    0.94
  10   2  -6    8.46    1.31
  10   2  -6    9.70    1.01
  10   2  -6    9.04    1.09
  10   2  -6    9.26    1.16
 -10   2   6    9.25    0.78
  -9  -2   6   36.53    2.34
  -9   2   6   39.62    1.88
   9   2  -6   40.87    2.27
   9   2  -6   38.08    2.40
   9   2  -6   39.74    2.15
   9   2  -6   40.30    2.69
   9   2  -6   40.55    2.34
  -9   2   6   40.43    2.19
  -8  -2   6   10.59    1.25
   8   2  -6   10.39    1.32
  -8   2   6   10.51    0.92
   8   2  -6    9.90    1.15
   8   2  -6   12.34    1.43
   8   2  -6    9.01    1.10
  -8   2   6   10.57    1.22
  -7  -2   6   80.10    4.00
  -7  -2   6   72.67    3.81
  -7   2   6   69.40    3.71
   7   2  -6   76.37    3.76
   7   2  -6   78.86    3.90
   7   2  -6   78.14    3.56
   7   2  -6   73.86    3.49
   6  -2  -6    0.78    0.86
   6  -2  -6    2.70    0.75
   6  -2  -6    0.97    0.75
  -6  -2   6    1.63    0.67
  -6  -2   6    1.26    0.60
   6   2  -6    0.49    0.66
   6   2  -6    1.32    0.79
  -6   2   6    0.37    0.72
   6   2  -6    0.27    0.79
   6   2  -6    0.07    1.40
   5  -2  -6   14.90    1.52
  -5  -2   6   13.96    1.25
  -5  -2   6   14.68    1.26
   5  -2  -6   12.66    1.80
   5  -2  -6   15.18    1.47
  -5  -2   6   13.55    1.55
   5   2  -6   16.15    1.76
  -5   2   6   16.90    1.39
   5   2  -6   17.03    1.52
   5   2  -6   24.11    2.73
  -5   2   6   13.55    1.32
   5   2  -6   14.94    1.36
  -4  -2   6    7.30    0.92
  -4  -2   6    7.33    0.99
  -4  -2   6    6.34    0.86
   4  -2  -6    8.24    1.02
   4  -2  -6    6.30    1.26
   4  -2  -6    6.35    0.96
  -4  -2   6    6.27    1.18
   4   2  -6    7.42    1.21
  -4   2   6    8.08    0.92
  -4   2   6    6.54    0.91
   4   2  -6    8.55    1.09
  -4   2   6    7.93    0.92
  -3  -2   6   94.92    5.14
  -3  -2   6   91.63    5.18
  -3  -2   6   95.47    4.57
   3  -2  -6   99.18    4.67
   3  -2  -6   92.18    4.59
  -3  -2   6   93.24    4.55
   3  -2  -6   93.89    5.33
  -3   2   6   99.40    4.28
   3   2  -6  102.04    5.48
  -3   2   6   95.35    4.27
  -3   2   6   91.21    4.50
   3   2  -6   93.77    4.76
  -2  -2   6   10.74    1.35
  -2  -2   6   12.84    1.20
   2  -2  -6   11.61    0.80
  -2  -2   6   13.03    1.13
   2  -2  -6   11.11    1.22
   2  -2  -6   13.43    1.04
   2  -2  -6   13.38    1.10
  -2  -2   6   12.04    1.12
  -2   2   6   14.28    1.00
  -2   2   6   14.22    1.07
   2   2  -6   15.49    1.38
  -2   2   6   13.02    1.12
   2   2  -6   13.69    1.26
  -1  -2   6   20.28    1.45
   1  -2  -6   18.84    1.05
  -1  -2   6   20.72    1.59
   1  -2  -6   20.11    1.28
   1  -2  -6   19.03    1.30
  -1  -2   6   18.10    1.47
  -1  -2   6   18.72    1.67
   1   2  -6   21.96    1.65
  -1   2   6   20.98    1.24
  -1   2   6   21.93    1.34
   1   2  -6   21.55    1.26
   1   2  -6   24.57    1.66
  -1   2   6   21.16    1.43
   0  -2   6   26.91    1.92
   0  -2   6   28.98    1.80
   0  -2  -6   27.35    1.52
   0  -2   6   29.44    2.00
   0  -2   6   24.26    1.73
   0   2  -6   27.27    1.87
   0   2   6   25.74    1.43
   0   2   6   24.07    1.62
   0   2   6   27.47    1.50
   0   2  -6   25.92    1.60
   1  -2   6  119.60    5.60
  -1  -2  -6  122.05    5.48
   1  -2   6  127.17    6.29
   1  -2   6  126.33    6.50
  -1   2  -6  119.67    5.95
   2  -2   6    7.83    1.03
   2  -2   6    8.84    1.04
  -2  -2  -6    8.40    0.75
   2  -2   6    8.92    1.13
  -2   2  -6    8.12    0.86
   3  -2   6   41.65    2.59
  -3  -2  -6   41.29    2.18
   3  -2   6   44.86    2.70
  -3   2  -6   44.50    2.52
   4  -2   6   19.08    1.63
  -4  -2  -6   18.65    1.24
   4  -2   6   18.91    1.55
  -4  -2  -6   20.02    1.10
  -4   2  -6   16.26    1.40
   4   2   6   15.72    1.07
   4   2   6   16.33    1.12
  -5  -2  -6    9.34    0.96
   5  -2   6   10.03    1.40
  -5  -2  -6    9.89    0.88
   5   2   6   11.48    0.87
   5   2   6   12.93    1.61
   5   2   6   11.64    0.93
   6  -2   6    4.47    0.87
  -6  -2  -6    4.64    0.74
  -6  -2  -6    4.01    0.75
   6  -2   6    4.06    1.03
   6   2   6    4.31    0.66
   6   2   6    4.54    0.75
   6   2   6    5.58    0.71
   6   2   6    5.26    1.13
   7  -2   6   42.89    2.27
   7  -2   6   42.98    2.84
  -7  -2  -6   44.74    2.35
   7   2   6   45.91    2.12
   7   2   6   46.78    3.02
   7   2   6   46.57    2.15
  -7   2  -6   47.74    2.62
   7   2   6   41.97    2.27
   8  -2   6    2.95    0.55
   8  -2   6    3.26    0.93
   8  -2   6    3.19    0.96
  -8  -2  -6    4.17    0.77
   8   2   6    3.49    0.69
  -8   2  -6    2.80    0.74
   8   2   6    4.00    1.04
   8   2   6    3.51    0.60
   8   2   6    3.65    0.58
   9  -2   6    3.83    0.85
   9  -2   6    3.71    0.91
   9   2   6    4.45    0.72
   9   2   6    3.96    0.65
   9   2   6    3.53    0.92
   9   2   6    4.40    0.56
  -9   2  -6    2.37    0.66
  10  -2   6    2.36    0.80
  10  -2   6    2.37    0.53
  10  -2   6    1.92    0.66
 -10   2  -6    2.23    0.54
  10   2   6    2.52    0.50
  10   2   6    1.63    0.68
  10   2   6    2.22    0.50
  10   2   6    1.26    0.47
  11  -2   6   22.30    1.27
  11  -2   6   22.74    1.15
 -11   2  -6   21.66    1.16
  11   2   6   21.57    1.19
  11  -3  -6    0.88    0.46
 -11  -3   6    1.04    0.48
 -11   3   6    0.48    0.49
  11   3  -6    1.11    0.48
 -11   3   6    0.29    0.47
  11   3  -6    0.84    0.40
  10  -3  -6   24.52    1.82
 -10  -3   6   28.00    1.82
  10   3  -6   29.99    1.61
  10   3  -6   31.60    1.82
 -10   3   6   30.46    1.76
  10   3  -6   27.48    1.53
  10   3  -6   31.76    1.67
  10   3  -6   27.25    1.96
  -9  -3   6    3.63    0.75
  -9   3   6    3.29    0.73
  -9   3   6    2.93    0.74
   9   3  -6    2.87    0.66
   9   3  -6    4.03    0.69
   9   3  -6    2.02    0.77
   9   3  -6    2.97    0.68
  -9   3   6    2.04    0.60
   9   3  -6    4.04    0.68
   9   3  -6    2.99    0.75
  -8  -3   6   22.62    1.76
  -8  -3   6   20.89    1.88
   8   3  -6   24.83    1.63
   8   3  -6   24.69    1.71
  -8   3   6   23.31    1.73
   8   3  -6   26.59    1.60
   8   3  -6   24.41    1.65
   8   3  -6   23.17    1.53
   8   3  -6   24.61    1.93
   8   3  -6   18.33    1.39
  -8   3   6   21.45    1.73
  -8   3   6   24.59    1.59
  -7  -3   6   26.36    1.99
  -7  -3   6   26.61    1.97
   7  -3  -6   24.97    2.43
  -7  -3   6   25.84    2.01
  -7   3   6   25.95    1.63
   7   3  -6   23.22    1.78
   7   3  -6   26.24    1.71
   7   3  -6   27.60    1.71
   7   3  -6   24.05    1.73
   7   3  -6   25.49    2.08
  -7   3   6   26.42    1.79
   7   3  -6   25.97    1.80
   7   3  -6   25.17    1.60
  -7   3   6   25.85    2.05
  -6  -3   6   51.52    3.16
   6  -3  -6   57.17    3.53
  -6  -3   6   55.30    3.19
   6  -3  -6   59.94    3.54
   6  -3  -6   51.91    3.49
  -6  -3   6   56.26    3.17
   6   3  -6   58.08    2.77
   6   3  -6   53.34    3.29
   6   3  -6   54.96    2.88
   6   3  -6   57.70    2.65
  -6   3   6   55.94    2.86
   6   3  -6   53.38    3.00
   6   3  -6   58.15    2.99
  -6   3   6   55.05    3.18
  -6   3   6   59.73    3.26
  -6   3   6   55.01    2.60
  -6   3   6   58.45    2.91
   6   3  -6   68.71    4.87
   6   3  -6   57.67    2.77
  -6   3   6   58.34    2.81
   5  -3  -6    2.06    0.81
  -5  -3   6    2.15    0.75
  -5  -3   6    2.12    0.73
   5  -3  -6    3.31    0.91
  -5   3   6    1.78    0.58
   5   3  -6    2.41    0.70
  -5   3   6    1.92    0.61
   5   3  -6    3.90    0.75
   5   3  -6    1.72    0.52
  -5   3   6    2.21    0.52
  -5   3   6    2.26    0.55
   5   3  -6    2.13    1.35
   5   3  -6    2.85    0.72
   5   3  -6    0.88    1.04
  -5   3   6    1.92    0.65
  -4  -3   6   29.34    1.85
   4  -3  -6   25.89    1.86
   4  -3  -6   27.97    1.92
  -4  -3   6   28.42    1.89
   4   3  -6   25.15    2.01
   4   3  -6   26.79    1.88
  -4   3   6   26.55    1.56
  -4   3   6   27.09    1.72
  -4   3   6   27.59    1.61
  -4   3   6   23.19    2.72
   4   3  -6   26.27    1.56
   4   3  -6   30.06    3.01
   4   3  -6   20.83    1.61
  -4   3   6   25.37    1.53
   4   3  -6   23.07    2.35
  -3  -3   6    4.12    0.87
   3  -3  -6    4.35    0.81
   3  -3  -6    3.52    0.80
  -3  -3   6    3.90    0.81
  -3   3   6    4.33    0.75
   3   3  -6    3.78    1.15
  -3   3   6    4.23    0.61
  -3   3   6    4.70    1.33
   3   3  -6    3.71    0.79
   3   3  -6    3.55    0.89
   3   3  -6    5.71    1.65
  -3   3   6    3.94    0.66
   2  -3  -6   29.84    1.86
  -2  -3   6   31.61    2.02
  -2  -3   6   28.67    2.00
   2  -3  -6   29.18    1.57
   2  -3  -6   31.39    1.89
   2   3  -6   39.43    3.28
  -2   3   6   34.27    1.77
   2   3  -6   33.14    2.23
  -2   3   6   30.48    1.55
  -2   3   6   29.28    2.93
  -2   3   6   31.37    1.81
   2   3  -6   32.88    2.54
  -1  -3   6    3.32    0.82
   1  -3  -6    4.39    0.56
   1  -3  -6    4.48    0.66
  -1  -3   6    3.54    0.79
  -1  -3   6    3.64    0.94
  -1   3   6    3.97    0.55
   1   3  -6    3.40    1.26
   1   3  -6    6.41    1.12
  -1   3   6    4.06    0.57
  -1   3   6    2.67    1.19
  -1   3   6    5.14    0.59
   0  -3   6   56.53    3.70
   0  -3   6   59.19    3.36
   0  -3  -6   60.62    2.89
   0  -3   6   55.83    3.64
   0  -3   6   61.53    3.34
   0  -3   6   57.13    3.28
   0   3  -6   68.65    4.67
   0   3   6   62.59    2.74
   0   3  -6   60.91    3.52
   0   3  -6   63.73    3.16
   0   3   6   59.96    2.45
   1  -3   6    1.71    0.79
   1  -3   6    0.82    0.66
   1  -3   6    1.45    0.80
  -1   3  -6    0.68    1.04
   1   3   6    0.83    0.38
   2  -3   6   31.50    2.26
   2  -3   6   30.11    2.28
   2   3   6   32.61    1.42
  -2   3  -6   35.98    3.03
   3  -3   6    5.74    1.12
   3   3   6    4.86    0.56
   4  -3   6   70.36    3.87
   4  -3   6   77.61    4.11
  -4  -3  -6   73.62    3.54
   4   3   6   74.96    2.88
  -4   3  -6   77.00    3.41
   5  -3   6    6.10    1.05
  -5  -3  -6    8.67    0.92
   5  -3   6    6.59    1.21
   5   3   6    5.80    0.66
   5   3   6    7.34    0.70
  -5   3  -6    6.78    0.94
   6  -3   6   22.94    1.81
   6  -3   6   25.10    2.08
  -6  -3  -6   24.90    1.47
  -6   3  -6   22.04    1.58
   6   3   6   20.55    1.30
   6   3   6   23.82    1.24
   6   3   6   22.68    2.16
   7  -3   6    1.05    0.57
   7  -3   6    1.95    0.88
   7   3   6    1.88    0.45
   7   3   6    1.76    0.59
  -7   3  -6    1.36    0.51
   7   3   6    1.07    0.88
   8  -3   6   13.92    1.10
   8  -3   6   12.30    1.50
   8   3   6   13.96    1.10
   8   3   6   14.42    0.94
   8   3   6   14.51    1.65
  -8   3  -6   13.21    1.08
   9  -3   6    1.79    0.35
   9  -3   6    2.89    0.85
   9  -3   6    1.86    0.74
   9   3   6    1.59    0.41
   9   3   6    0.88    0.73
   9   3   6    0.93    0.45
   9   3   6    2.02    0.42
  -9   3  -6    1.50    0.40
  10  -3   6    5.38    0.69
  10   3   6    6.00    0.62
  10   3   6    3.46    0.48
  10   3   6    4.54    0.49
 -10  -4   6    1.48    0.49
  10  -4  -6   -0.02    0.49
  10   4  -6    0.95    0.32
  10   4  -6    0.57    0.47
 -10   4   6    0.68    0.35
 -10   4   6    0.87    0.35
  10   4  -6    1.13    0.41
  -9  -4   6   11.48    1.16
   9   4  -6   10.18    1.08
  -9   4   6   10.39    0.86
   9   4  -6    9.93    0.99
   9   4  -6   11.30    0.99
  -9   4   6   11.20    1.03
   9   4  -6   10.93    1.04
  -9   4   6   10.97    0.92
  -8  -4   6    3.02    0.81
   8   4  -6    2.93    0.57
   8   4  -6    3.99    0.74
  -8   4   6    3.70    0.81
   8   4  -6    3.89    0.75
  -8   4   6    4.17    0.61
   8   4  -6    2.74    0.48
  -8   4   6    2.96    0.57
   8   4  -6    4.84    0.83
  -7  -4   6    4.07    0.96
  -7  -4   6    4.07    0.88
   7  -4  -6    2.72    1.21
   7   4  -6    4.59    0.84
  -7   4   6    3.52    0.57
  -7   4   6    2.66    0.83
   7   4  -6    2.79    0.74
   7   4  -6    4.34    0.84
  -7   4   6    3.17    0.74
   7   4  -6    2.98    0.62
  -7   4   6    2.99    0.84
   7   4  -6    2.47    0.62
  -7   4   6    3.36    0.59
   7   4  -6    2.94    0.60
   6  -4  -6    3.72    1.14
   6  -4  -6    6.24    1.26
  -6  -4   6    4.49    0.98
  -6  -4   6    3.54    0.97
   6   4  -6    6.37    1.04
   6   4  -6    4.66    0.71
  -6   4   6    6.18    0.70
   6   4  -6    6.26    0.83
   6   4  -6    6.33    0.97
   6   4  -6    5.93    0.87
  -6   4   6    5.95    0.86
   6   4  -6    2.72    0.73
  -6   4   6    7.56    1.14
  -6   4   6    6.12    0.78
  -6   4   6    7.50    0.99
  -5  -4   6   46.95    2.97
  -5  -4   6   50.84    2.94
  -5  -4   6   44.36    2.94
   5  -4  -6   49.42    3.06
   5  -4  -6   47.52    3.06
   5   4  -6   50.25    2.37
   5   4  -6   49.83    2.49
   5   4  -6   53.33    4.29
  -5   4   6   51.00    2.14
   5   4  -6   44.78    2.38
  -5   4   6   50.71    2.84
  -5   4   6   48.84    2.48
   5   4  -6   38.25    2.50
  -5   4   6   49.18    2.28
  -5   4   6   50.70    2.42
   5   4  -6   50.56    2.90
   4  -4  -6    0.67    0.69
  -4  -4   6    1.34    0.77
  -4  -4   6    1.03    0.95
  -4  -4   6    1.02    0.76
   4  -4  -6    1.24    0.71
  -4   4   6    0.49    0.52
   4   4  -6    0.79    0.62
   4   4  -6    0.18    0.63
  -4   4   6    0.30    0.42
  -4   4   6    0.63    0.33
  -4   4   6    0.43    0.94
  -4   4   6    0.29    0.46
   4   4  -6    0.23    0.56
  -4   4   6    0.50    0.39
   4   4  -6    0.48    0.40
   4   4  -6    1.25    0.58
   4   4  -6    0.25    1.04
   4   4  -6    1.29    0.72
   3  -4  -6   42.24    2.59
  -3  -4   6   41.82    2.68
  -3  -4   6   43.98    2.66
  -3  -4   6   36.42    2.86
   3  -4  -6   43.54    2.60
   3   4  -6   44.16    2.26
   3   4  -6   40.00    2.23
   3   4  -6   36.93    2.41
   3   4  -6   48.43    4.03
   3   4  -6   41.15    2.14
   3   4  -6   44.97    2.33
  -3   4   6   41.13    2.32
  -3   4   6   41.45    2.10
   3   4  -6   42.52    2.61
  -3   4   6   42.83    3.80
  -3   4   6   42.91    2.02
  -2  -4   6    4.23    0.97
   2  -4  -6    5.08    0.86
   2  -4  -6    4.17    0.78
  -2  -4   6    3.34    0.94
  -2  -4   6    4.42    1.10
   2   4  -6    2.44    0.71
   2   4  -6    1.94    0.94
   2   4  -6    3.44    0.77
  -2   4   6    3.21    0.52
  -2   4   6    2.06    0.54
  -2   4   6    2.36    1.18
   2   4  -6    3.65    1.43
   2   4  -6    1.66    0.61
   2   4  -6    1.89    0.76
   2   4  -6    3.46    0.70
  -2   4   6    2.65    0.55
  -1  -4   6   35.86    2.60
  -1  -4   6   35.78    2.41
  -1  -4   6   36.66    2.44
   1  -4  -6   35.84    2.12
  -1  -4   6   38.28    2.62
   1   4  -6   44.04    3.60
   1   4  -6   35.68    2.15
   1   4  -6   27.74    2.21
  -1   4   6   34.61    3.35
  -1   4   6   36.92    1.68
  -1   4   6   36.14    1.74
  -1   4   6   37.20    1.93
   1   4  -6   36.34    1.98
   1   4  -6   37.99    2.30
   1   4  -6   33.26    2.26
   1   4  -6   35.92    2.04
   1   4  -6   37.60    2.10
   0  -4  -6    2.56    0.63
   0  -4   6    3.19    0.92
   0  -4   6    4.23    1.09
   0  -4   6    4.66    0.93
   0  -4   6    4.92    1.14
   0   4  -6    4.89    0.80
   0   4   6    2.62    1.28
   0   4  -6    3.56    0.88
   0   4  -6    4.85    0.95
   0   4   6    3.64    0.57
   0   4  -6    3.77    0.80
   0   4  -6    4.43    0.86
   0   4  -6    4.97    0.98
   0   4  -6    5.38    1.44
   0   4   6    4.33    0.54
   0   4  -6    4.93    0.85
   1  -4   6   28.64    2.30
   1  -4   6   27.66    2.35
   1  -4   6   29.96    2.29
   1  -4   6   30.13    2.28
  -1   4  -6   30.11    2.00
  -1   4  -6   29.38    1.90
  -1   4  -6   32.09    2.15
  -1   4  -6   35.72    3.15
  -1   4  -6   29.68    2.06
   1   4   6   31.20    1.36
   2  -4   6    6.48    1.22
   2  -4   6    6.67    1.07
   2  -4   6    5.46    1.07
  -2   4  -6    8.81    1.21
  -2   4  -6    6.82    1.01
  -2   4  -6    8.08    1.08
  -2   4  -6    6.93    1.59
   3  -4   6   25.40    2.12
   3  -4   6   25.46    1.94
  -3   4  -6   25.48    2.08
  -3   4  -6   27.55    2.72
  -3   4  -6   26.72    1.79
  -3   4  -6   26.30    1.91
   4  -4   6    3.62    0.91
   4  -4   6    2.58    0.99
  -4   4  -6    2.84    0.88
  -4   4  -6    5.85    0.80
   5  -4   6   14.79    1.71
   5  -4   6   14.87    1.52
   5   4   6   15.78    1.27
  -5   4  -6   16.90    1.30
   6  -4   6    0.16    0.64
   6  -4   6    0.90    0.79
   6   4   6   -0.08    0.49
   7  -4   6   18.24    1.69
   7  -4   6   18.27    1.42
   7   4   6   20.01    1.29
   8  -4   6    3.08    0.54
   8   4   6    2.62    0.61
   8   4   6    3.25    0.45
   9   4   6   17.72    0.90
  -8  -5   6   23.75    1.60
  -8  -5   6   26.21    1.58
  -8   5   6   21.67    1.38
   8   5  -6   25.08    1.33
   8   5  -6   22.03    1.37
  -8   5   6   19.56    1.36
   8   5  -6   22.87    1.31
  -7  -5   6    0.23    0.62
  -7   5   6   -0.03    0.48
   7   5  -6    0.50    0.41
  -7   5   6   -0.45    0.56
   7   5  -6   -0.62    0.37
   7   5  -6   -0.48    0.53
  -7   5   6   -0.48    0.45
  -6  -5   6   11.37    1.32
   6  -5  -6   11.55    1.45
  -6   5   6   11.24    1.01
   6   5  -6    7.59    1.07
  -6   5   6   11.49    1.17
   6   5  -6   11.86    1.04
   6   5  -6   11.67    1.00
   6   5  -6    9.00    1.18
  -5  -5   6    8.69    1.22
   5  -5  -6    7.24    1.32
  -5  -5   6    3.29    0.98
   5   5  -6    6.77    0.90
  -5   5   6    6.33    0.83
  -5   5   6    5.89    0.78
   5   5  -6    5.26    0.75
   5   5  -6    5.64    0.96
   5   5  -6    5.72    1.44
  -4  -5   6   12.84    1.73
   4  -5  -6   17.10    1.67
  -4  -5   6   14.40    1.58
   4   5  -6   18.55    2.44
   4   5  -6   19.24    1.32
   4   5  -6   17.29    1.30
  -4   5   6   17.66    1.16
   4   5  -6   19.00    0.98
  -4   5   6   18.55    1.29
   4   5  -6   15.56    1.55
   4   5  -6   11.56    1.50
  -3  -5   6    1.56    0.82
  -3  -5   6    1.20    0.81
   3  -5  -6    1.89    0.79
  -3  -5   6    2.36    0.98
   3   5  -6    2.06    0.63
  -3   5   6    1.52    0.50
   3   5  -6    1.31    0.44
   3   5  -6    1.56    0.82
  -3   5   6    2.11    1.19
   3   5  -6    0.62    0.67
   3   5  -6    1.43    0.53
   3   5  -6    1.33    0.44
   3   5  -6    1.74    1.06
  -3   5   6    0.90    0.41
  -2  -5   6   23.55    2.06
   2  -5  -6   25.12    1.89
  -2  -5   6   24.49    2.15
  -2  -5   6   23.62    1.97
  -2   5   6   23.29    2.79
   2   5  -6   25.25    1.43
   2   5  -6   27.87    1.58
   2   5  -6   24.60    1.62
  -2   5   6   26.13    1.49
   2   5  -6   19.22    1.80
   2   5  -6   29.72    3.00
   2   5  -6   24.79    1.77
  -2   5   6   25.38    1.33
   2   5  -6   23.88    1.55
  -1  -5   6    2.89    0.95
  -1  -5   6    3.10    0.92
  -1  -5   6    3.61    1.04
   1   5  -6    4.28    0.94
   1   5  -6    2.95    1.20
   1   5  -6    3.42    0.87
  -1   5   6    4.25    0.52
   1   5  -6    3.69    0.74
   1   5  -6    3.23    0.66
   1   5  -6    3.83    0.69
   1   5  -6    4.34    0.68
  -1   5   6    5.52    1.64
  -1   5   6    2.78    0.55
   0  -5   6   28.66    2.23
   0  -5   6   30.07    2.29
   0  -5   6   31.70    2.35
   0  -5   6   30.09    2.30
   0   5  -6   27.64    1.91
   0   5   6   29.18    3.10
   0   5  -6   27.37    2.05
   0   5  -6   30.70    1.85
   0   5  -6   28.56    2.95
   0   5   6   26.96    1.47
   0   5  -6   29.61    1.77
   0   5  -6   30.70    1.70
   0   5  -6   28.14    1.80
   1  -5   6    1.85    0.74
   1  -5   6    2.03    0.95
   1  -5   6    1.39    0.87
   1  -5   6    1.66    0.92
  -1   5  -6    2.12    0.71
  -1   5  -6    1.40    0.57
  -1   5  -6    1.53    0.59
  -1   5  -6    1.31    0.88
  -1   5  -6    1.12    0.79
  -1   5  -6    1.46    0.69
  -1   5  -6    2.37    0.64
   2  -5   6   46.70    3.05
   2  -5   6   51.51    2.84
  -2   5  -6   50.96    2.62
  -2   5  -6   45.31    3.86
  -2   5  -6   46.19    2.88
  -2   5  -6   46.95    2.39
  -2   5  -6   45.12    2.53
   3  -5   6    2.81    0.78
   3  -5   6    1.50    0.90
  -3   5  -6    3.19    0.84
  -3   5  -6    2.45    0.66
  -3   5  -6    3.69    0.69
  -3   5  -6    3.97    1.25
  -3   5  -6    4.41    0.78
   4  -5   6    5.08    1.14
   4  -5   6    5.83    0.90
  -4   5  -6    5.56    0.92
  -4   5  -6    7.24    0.88
  -4   5  -6    3.48    0.95
  -4   5  -6    5.37    0.80
   5  -5   6    1.39    0.83
  -5   5  -6    1.19    0.50
  -5   5  -6    1.97    0.60
  -5   5  -6    1.92    0.52
  -5   5  -6    1.94    0.79
   6  -5   6   24.34    1.62
  -6   5  -6   24.92    1.48
  -6   5  -6   22.84    1.56
  -6   5  -6   25.35    1.88
   7  -5   6    1.44    0.42
  -7   5  -6    0.89    0.35
  -7   5  -6    0.92    0.42
  -5  -6   6    6.15    0.83
  -5  -6   6    5.35    0.80
  -5   6   6    6.28    0.59
   5   6  -6    6.60    0.86
  -5   6   6    6.15    0.73
   5   6  -6    6.13    0.68
   5   6  -6    7.52    0.69
  -5   6   6    4.20    0.74
  -4  -6   6    4.80    0.88
  -4  -6   6    3.91    0.74
   4   6  -6    2.56    0.97
  -4   6   6    2.57    0.54
   4   6  -6    2.98    0.52
   4   6  -6    3.48    0.70
   4   6  -6    4.13    0.62
  -4   6   6    2.90    0.42
  -3  -6   6    5.41    0.88
  -3  -6   6    5.02    1.01
  -3  -6   6    4.10    0.98
  -3   6   6    5.43    0.65
   3   6  -6    3.82    0.77
   3   6  -6    5.42    0.72
   3   6  -6    3.34    0.99
   3   6  -6    6.69    0.75
  -3   6   6    4.84    0.50
  -2  -6   6    2.45    0.73
  -2  -6   6    2.52    0.81
  -2  -6   6    3.32    0.80
   2   6  -6    2.08    0.91
   2   6  -6    2.80    0.62
   2   6  -6    2.16    0.53
   2   6  -6    2.37    0.54
   2   6  -6    1.93    0.42
  -2   6   6    2.17    0.46
  -1  -6   6   18.39    1.49
  -1  -6   6   17.60    1.65
  -1  -6   6   17.24    1.60
   1   6  -6   20.08    1.30
   1   6  -6   19.86    1.29
   1   6  -6   20.56    1.30
   1   6  -6   20.17    1.38
  -1   6   6   20.33    1.12
   1   6  -6   17.13    2.09
   0  -6   6    1.13    0.59
   0  -6   6    1.58    0.76
   0   6   6    1.17    0.41
   0   6  -6    0.16    0.70
   0   6  -6    2.06    0.58
   0   6  -6    0.47    0.41
   0   6  -6    0.74    0.47
   0   6  -6    1.27    0.51
   1  -6   6   20.25    1.54
   1  -6   6   17.66    1.71
  -1   6  -6   21.99    1.45
  -1   6  -6   17.12    2.08
  -1   6  -6   24.42    1.45
  -1   6  -6   22.95    1.40
   2  -6   6    0.94    0.55
  -2   6  -6    1.42    0.55
  -2   6  -6    1.05    0.77
  -2   6  -6    1.05    0.48
  -2   6  -6    1.70    0.46
   3  -6   6   28.28    1.65
  -3   6  -6   26.63    1.49
  -3   6  -6   22.03    1.55
  -4   6  -6    0.20    0.32
 -12   0   7   14.98    1.05
  12   0  -7   13.83    1.25
  11   0  -7    2.65    0.82
 -11   0   7    1.83    0.61
 -11   0   7    1.89    0.72
  10   0  -7   12.84    1.04
  10   0  -7   14.72    1.77
 -10   0   7   11.54    1.25
   9   0  -7   14.74    1.29
  -9   0   7   15.20    1.42
   8   0  -7    7.77    1.05
  -8   0   7    7.28    1.01
   7   0  -7    1.35    1.48
   6   0  -7    0.31    0.50
   6   0  -7    0.75    1.35
  -6   0   7    0.94    0.55
  -5   0   7   67.48    3.58
   5   0  -7   66.02    3.63
   4   0  -7   98.16    5.33
   4   0  -7  100.44    5.01
  -4   0   7   94.38    4.86
   3   0  -7    3.95    0.73
   3   0  -7    2.96    0.63
  -3   0   7    3.71    0.81
  -3   0   7    3.73    0.66
   3   0  -7    3.11    0.73
  -3   0   7    2.11    0.64
   2   0  -7   45.89    2.76
   2   0  -7   45.31    2.46
   2   0  -7   43.65    2.59
   2   0  -7   45.41    2.12
  -2   0   7   44.62    2.56
  -2   0   7   45.09    2.94
   1   0  -7   80.15    4.21
   1   0  -7   79.76    3.95
   1   0  -7   84.13    3.47
   1   0  -7   80.41    4.47
  -1   0   7   83.02    4.03
   0   0  -7   52.59    3.02
   0   0  -7   49.39    2.83
   0   0  -7   51.19    2.31
   0   0   7   48.29    2.71
   0   0  -7   51.04    2.67
  -1   0  -7    2.33    0.47
  -1   0  -7    1.59    0.59
  -1   0  -7    1.54    0.54
  -1   0  -7    1.67    0.51
  -2   0  -7   78.64    3.87
  -2   0  -7   79.81    4.40
  -2   0  -7   77.02    3.38
  -3   0  -7    0.28    0.36
   3   0   7    0.04    0.69
  -3   0  -7    0.15    0.27
  -3   0  -7    0.26    0.48
  -4   0  -7   24.05    1.68
  -4   0  -7   23.05    1.41
  -4   0  -7   21.24    1.79
   4   0   7   23.91    1.84
   5   0   7   15.62    1.66
   5   0   7   14.87    1.32
   5   0   7   15.09    1.28
  -5   0  -7   15.65    1.18
  -5   0  -7   16.73    1.42
   6   0   7   39.68    2.15
   6   0   7   39.60    2.15
   6   0   7   40.51    2.30
  -6   0  -7   39.30    2.58
   6   0   7   37.89    2.15
   6   0   7   43.63    2.67
  -6   0  -7   40.99    2.21
   7   0   7    0.49    0.61
   7   0   7    0.28    0.78
   7   0   7    0.74    0.70
  -7   0  -7    0.19    0.49
   7   0   7   -0.52    0.45
   7   0   7    0.38    0.51
   8   0   7   10.20    1.30
   8   0   7    9.93    1.35
   8   0   7    8.19    0.99
   8   0   7   10.13    1.33
   8   0   7    9.23    0.89
   9   0   7    3.93    0.89
   9   0   7    4.94    0.93
   9   0   7    3.97    0.63
  10   0   7   20.31    1.59
  10   0   7   21.18    1.49
  10   0   7   20.94    1.13
  11   0   7    0.13    0.31
 -12  -1   7   10.34    1.00
  12  -1  -7   10.51    1.19
  12   1  -7    7.48    0.95
  12   1  -7    8.57    0.78
  12   1  -7    8.23    0.98
 -11  -1   7   17.05    1.55
  11  -1  -7   16.54    1.16
 -11  -1   7   17.44    1.45
  11   1  -7   17.22    1.50
 -11   1   7   17.73    1.15
  11   1  -7   18.19    1.60
  11   1  -7   17.75    1.41
  10  -1  -7   19.32    1.48
 -10   1   7   21.14    1.42
  10   1  -7   19.90    1.75
  10   1  -7   20.53    1.85
 -10   1   7   19.87    1.31
   9  -1  -7    4.56    0.89
  -9  -1   7    7.96    1.15
   9   1  -7    7.15    1.13
   9   1  -7    6.02    0.69
  -9   1   7    6.16    0.85
   9   1  -7    6.83    0.85
  -8  -1   7    7.39    0.99
  -8   1   7    6.58    0.81
   8   1  -7    6.51    0.88
  -8   1   7    6.66    0.89
   8   1  -7    7.01    0.82
   8   1  -7    6.70    1.23
  -7  -1   7   55.92    2.98
   7  -1  -7   56.17    4.63
   6   1  -7    3.23    1.61
  -5  -1   7   19.70    1.56
   5  -1  -7   19.70    1.77
  -5  -1   7   17.86    1.60
   5  -1  -7   20.10    1.59
   5  -1  -7   21.16    1.86
   5   1  -7   19.58    2.63
   5   1  -7   16.60    1.27
  -5   1   7   17.93    1.42
  -4  -1   7   12.32    1.18
   4  -1  -7   11.15    1.16
   4  -1  -7   12.32    1.32
  -4  -1   7   11.90    1.24
   4  -1  -7   11.42    1.30
  -4   1   7   11.40    1.11
   4   1  -7   11.60    0.99
  -4   1   7   11.88    1.23
   3  -1  -7   33.44    2.50
  -3  -1   7   38.21    2.32
   3  -1  -7   35.45    2.39
  -3  -1   7   35.52    2.31
   3  -1  -7   38.54    2.32
  -3   1   7   38.90    2.29
  -3   1   7   36.73    2.04
   3   1  -7   39.68    2.20
  -2  -1   7    0.62    0.54
   2  -1  -7    0.92    0.50
   2  -1  -7    0.78    0.54
   2  -1  -7    1.04    0.36
  -2  -1   7    1.03    0.46
   2   1  -7    1.74    0.45
   2   1  -7    1.17    0.54
  -2   1   7    1.13    0.54
  -2   1   7    1.14    0.48
  -1  -1   7   58.80    3.40
   1  -1  -7   61.38    3.22
   1  -1  -7   63.80    2.76
   1   1  -7   69.45    3.66
  -1   1   7   65.65    3.24
  -1   1   7   59.38    3.00
   1   1  -7   65.89    3.42
   0  -1  -7   10.42    0.76
   0  -1   7   11.57    1.02
   0  -1  -7   10.35    0.94
   0   1  -7   10.66    1.11
   0   1  -7   10.95    1.01
   0   1   7   10.61    0.97
  -1  -1  -7   15.67    1.13
  -1  -1  -7   15.36    1.36
  -1  -1  -7   16.24    0.98
   1  -1   7   14.47    1.19
  -1   1  -7   17.68    1.40
  -1   1  -7   16.81    1.09
  -1   1  -7   16.58    1.30
  -2  -1  -7   35.54    2.35
  -2  -1  -7   35.90    2.02
   2  -1   7   34.43    2.26
  -2  -1  -7   36.62    1.80
  -2   1  -7   39.03    2.43
  -2   1  -7   38.43    1.89
  -2   1  -7   35.74    2.27
  -3  -1  -7   73.48    4.31
   3  -1   7   77.34    3.91
  -3  -1  -7   81.48    3.80
  -3  -1  -7   77.79    3.36
  -3   1  -7   78.70    3.43
  -3   1  -7   76.40    4.38
  -3   1  -7   72.67    4.15
  -4  -1  -7    5.87    0.69
  -4  -1  -7    6.84    0.83
  -4  -1  -7    4.97    0.94
   4  -1   7    6.80    1.15
  -4   1  -7    3.69    0.70
  -4   1  -7    5.07    0.90
   4   1   7    6.99    1.20
   4   1   7    3.11    0.67
   4   1   7    5.08    0.74
  -5  -1  -7   14.50    1.31
   5  -1   7   13.73    1.49
  -5  -1  -7   13.89    1.08
   5   1   7   13.21    1.06
   5   1   7   15.53    1.63
   5   1   7   12.57    1.06
   6  -1   7    8.45    1.20
   6  -1   7    7.49    0.82
   6  -1   7    6.90    1.13
  -6  -1  -7    9.30    1.03
  -6  -1  -7    8.49    0.91
   6   1   7    8.08    0.91
   6   1   7    6.90    0.87
   6   1   7    7.40    0.87
   6   1   7    6.25    1.19
   6   1   7    6.83    1.08
   7  -1   7   53.12    3.15
   7  -1   7   50.15    2.70
  -7  -1  -7   49.11    2.66
   7  -1   7   50.00    2.90
   7   1   7   48.57    2.83
   7   1   7   52.03    2.32
   7   1   7   52.83    2.50
   7   1   7   58.98    3.24
   7   1   7   54.97    2.50
  -8  -1  -7    2.96    0.84
   8  -1   7    4.18    0.77
   8  -1   7    2.49    0.81
   8  -1   7    3.37    0.78
   8   1   7    3.16    0.68
   8   1   7    3.24    0.69
   8   1   7    2.50    0.73
   8   1   7    3.13    0.91
   8   1   7    3.50    0.55
   9  -1   7   20.67    1.72
   9  -1   7   22.69    1.46
   9  -1   7   23.01    1.53
   9  -1   7   21.79    1.95
   9   1   7   24.85    1.55
   9   1   7   23.51    1.86
   9   1   7   21.98    1.36
   9   1   7   22.45    1.07
   9   1   7   23.39    1.48
  10  -1   7    2.28    0.64
  10  -1   7    1.04    0.62
  10  -1   7    0.26    0.39
  10  -1   7    0.65    0.28
  10   1   7    0.71    0.36
  10   1   7    0.44    0.66
  10   1   7    0.65    0.47
  10   1   7    0.69    0.48
  10   1   7    0.82    0.46
  11  -1   7    2.60    0.38
  11  -1   7    2.98    0.56
  11  -1   7    1.85    0.38
 -11   1  -7    2.03    0.44
 -12  -2   7    3.46    0.70
  12  -2  -7    3.78    0.44
  12   2  -7    3.44    0.49
  12   2  -7    2.89    0.43
  12   2  -7    2.84    0.67
  11  -2  -7    1.34    0.48
  11   2  -7    2.99    0.72
  11   2  -7    1.89    0.47
  11   2  -7    0.82    0.51
  11   2  -7    2.05    0.59
  10  -2  -7   13.18    1.34
 -10  -2   7   12.49    1.21
  10   2  -7   13.17    1.28
  10   2  -7   11.48    1.33
  10   2  -7   12.04    1.04
  10   2  -7   14.19    1.54
  10   2  -7   13.88    1.16
  -9  -2   7    2.57    0.71
   9   2  -7    2.64    0.77
   9   2  -7    2.21    0.81
  -9   2   7    3.11    0.61
   9   2  -7    3.20    0.75
   9   2  -7    2.63    0.63
   8  -2  -7   18.31    3.25
  -8  -2   7   15.26    1.36
  -8   2   7    7.33    1.14
   8   2  -7   13.89    1.45
   8   2  -7   11.94    1.16
   8   2  -7   12.05    1.54
   8   2  -7   12.80    1.34
  -8   2   7   12.31    0.88
  -8   2   7   12.29    1.36
  -7  -2   7   19.77    1.53
   7   2  -7   16.58    1.62
   7   2  -7   16.75    1.64
   7   2  -7   16.08    1.33
  -7   2   7   17.09    1.48
  -7   2   7   14.95    0.99
   7   2  -7   17.81    1.76
  -7   2   7   19.34    1.65
  -7   2   7   17.87    1.60
  -6  -2   7   28.46    1.90
   6   2  -7   28.84    3.28
   6   2  -7   25.07    2.17
   5  -2  -7   13.83    1.50
  -5  -2   7   12.77    1.52
   5  -2  -7   11.28    1.48
  -5  -2   7   14.11    1.30
  -5   2   7    9.00    1.17
   5   2  -7   12.37    2.41
  -5   2   7   11.34    1.33
  -5   2   7   10.25    1.24
  -5   2   7   13.02    1.32
  -4  -2   7   32.09    2.31
  -4  -2   7   29.79    2.27
  -4  -2   7   29.36    1.95
   4  -2  -7   29.56    2.08
   4  -2  -7   28.51    2.14
   4   2  -7   20.61    2.85
  -4   2   7   29.04    1.97
  -4   2   7   30.71    1.93
   3  -2  -7   25.18    1.68
  -3  -2   7   22.40    1.88
  -3  -2   7   25.09    1.65
   3  -2  -7   18.12    1.95
   3  -2  -7   23.04    1.71
  -3  -2   7   21.02    1.69
   3   2  -7   16.41    2.43
  -3   2   7   18.83    1.50
  -3   2   7   18.53    1.42
   2  -2  -7   67.94    3.53
   2  -2  -7   70.43    2.99
  -2  -2   7   70.51    3.97
   2  -2  -7   68.86    3.60
  -2  -2   7   69.69    4.05
   2  -2  -7   66.21    4.15
  -2   2   7   69.33    3.46
  -2   2   7   69.36    3.28
  -2   2   7   63.96    3.43
  -1  -2   7   30.87    2.10
  -1  -2   7   29.20    2.25
   1  -2  -7   31.06    1.89
   1  -2  -7   30.92    1.52
  -1  -2   7   29.23    2.17
   1   2  -7   31.28    1.81
  -1   2   7   30.97    1.80
  -1   2   7   29.44    1.91
   0  -2  -7   33.29    1.98
   0  -2   7   32.12    2.36
   0  -2  -7   35.06    1.60
   0  -2  -7   30.31    2.00
   0  -2   7   33.70    2.18
   0  -2   7   32.41    2.26
   0   2  -7   32.98    1.97
   0   2   7   33.95    1.86
   1  -2   7   15.57    1.53
  -1  -2  -7   15.76    1.18
   1  -2   7   13.03    1.45
  -1  -2  -7   15.81    0.94
  -1   2  -7   15.00    1.19
   2  -2   7   44.60    2.76
  -2  -2  -7   49.95    2.46
   2  -2   7   43.55    2.91
  -2  -2  -7   46.63    2.14
  -2   2  -7   48.11    2.69
   2   2   7   46.77    2.01
  -3  -2  -7    3.86    0.58
   3  -2   7    4.06    0.98
  -3  -2  -7    2.34    0.52
   3  -2   7    3.00    0.92
  -3   2  -7    4.35    0.82
   3   2   7    3.92    0.55
  -4  -2  -7   89.77    3.90
  -4  -2  -7   92.39    4.39
   4  -2   7   91.26    4.63
   4   2   7   91.96    3.61
   4   2   7   92.07    3.64
   4   2   7   89.95    3.62
  -5  -2  -7    6.86    0.86
  -5  -2  -7    5.12    0.73
   5  -2   7    5.07    0.86
   5  -2   7    7.11    1.26
   5   2   7    5.50    0.69
   5   2   7    4.24    1.16
   5   2   7    3.97    0.78
   5   2   7    4.03    0.58
  -6  -2  -7   31.61    2.09
   6  -2   7   30.28    1.85
  -6  -2  -7   28.55    1.78
   6  -2   7   33.82    2.36
   6   2   7   32.99    1.71
   6   2   7   32.94    1.67
   6   2   7   30.38    1.80
   6   2   7   35.25    2.51
   7  -2   7   12.68    1.00
   7  -2   7   12.83    1.71
  -7  -2  -7    9.96    1.07
   7  -2   7   12.09    1.51
   7   2   7   10.90    1.03
   7   2   7   13.75    1.75
   7   2   7   12.27    1.00
   7   2   7   12.00    1.03
  -7   2  -7   12.43    1.44
   8  -2   7   18.03    1.71
   8  -2   7   17.19    1.64
  -8   2  -7   19.66    1.56
   8   2   7   21.58    1.35
   8   2   7   23.50    1.93
   8   2   7   21.47    1.22
   8   2   7   20.21    1.27
   9  -2   7    7.78    0.97
   9  -2   7    8.71    1.20
  -9   2  -7    8.18    1.00
   9   2   7    9.21    0.87
   9   2   7    9.00    1.22
   9   2   7    8.76    0.82
  10  -2   7    5.35    0.68
  10  -2   7    5.85    0.79
  10   2   7    4.20    0.56
 -10   2  -7    5.61    0.68
  10   2   7    4.73    0.58
  10   2   7    5.99    0.67
  11  -3  -7   22.87    1.31
 -11  -3   7   21.70    1.27
 -11   3   7   20.42    1.34
  11   3  -7   19.54    1.12
 -11   3   7   19.85    1.28
  11   3  -7   21.73    1.38
  10  -3  -7   30.65    2.00
 -10  -3   7   35.54    1.94
 -10   3   7   31.66    1.93
  10   3  -7   32.65    1.71
  10   3  -7   32.89    2.01
 -10   3   7   32.74    1.82
  10   3  -7   32.19    1.63
  10   3  -7   33.71    1.73
  -9  -3   7   24.80    1.70
   9   3  -7   24.96    1.87
  -9   3   7   26.01    1.56
   9   3  -7   23.86    1.52
  -9   3   7   21.03    1.66
  -9   3   7   25.61    1.61
   9   3  -7   24.39    1.57
   9   3  -7   22.41    1.50
  -8  -3   7    0.34    0.60
   8   3  -7    0.35    0.50
   8   3  -7    0.96    0.53
   8   3  -7    0.15    0.49
   8   3  -7    0.67    0.53
  -8   3   7    0.36    0.48
  -8   3   7   -0.15    0.51
   8   3  -7   -0.15    0.68
  -8   3   7    0.11    0.60
  -7  -3   7   28.12    2.01
  -7  -3   7   32.92    2.21
   7   3  -7   27.36    1.90
   7   3  -7   26.41    2.19
  -7   3   7   26.45    2.07
  -7   3   7   27.54    1.85
   7   3  -7   28.32    1.87
   7   3  -7   31.25    1.84
   7   3  -7   29.30    1.80
  -7   3   7   28.33    1.70
   6  -3  -7    7.50    1.45
   6  -3  -7    7.36    1.52
  -6  -3   7    7.06    1.06
  -6  -3   7    9.03    1.27
   6   3  -7    4.35    1.06
  -6   3   7    4.76    0.81
   6   3  -7    5.69    0.94
  -6   3   7    6.02    1.18
  -6   3   7    4.17    0.93
  -6   3   7    4.02    0.75
   6   3  -7    3.80    0.73
   6   3  -7    5.38    0.90
   6   3  -7    8.63    1.92
   6   3  -7    9.22    1.17
  -6   3   7    3.71    0.98
  -6   3   7    4.95    0.74
   6   3  -7    6.69    0.96
  -5  -3   7   39.07    2.45
  -5  -3   7   33.58    2.36
   5  -3  -7   39.90    2.64
   5  -3  -7   39.14    2.64
  -5  -3   7   42.36    2.71
  -5   3   7   36.24    2.04
  -5   3   7   34.78    1.98
   5   3  -7   36.52    2.32
   5   3  -7   35.34    2.16
   5   3  -7   36.41    3.68
   5   3  -7   35.71    1.97
  -5   3   7   35.87    2.31
   5   3  -7   34.79    2.26
   5   3  -7   33.69    2.14
  -5   3   7   34.76    1.85
  -5   3   7   35.46    2.14
  -4  -3   7    1.33    0.79
  -4  -3   7    1.56    0.78
  -4  -3   7    2.13    0.74
   4  -3  -7    0.78    0.74
   4  -3  -7    1.09    0.65
  -4   3   7    0.46    0.48
   4   3  -7    1.01    0.51
   4   3  -7    1.35    1.31
  -4   3   7    0.66    0.45
   4   3  -7    0.06    0.70
   4   3  -7    2.04    0.71
  -4   3   7    0.62    0.43
  -4   3   7    0.77    0.52
  -4   3   7    0.79    0.48
  -3  -3   7   21.31    1.76
  -3  -3   7   20.90    1.73
   3  -3  -7   22.36    1.68
   3  -3  -7   21.89    1.68
   3   3  -7   23.13    1.81
   3   3  -7   22.80    2.78
  -3   3   7   21.78    1.34
  -3   3   7   21.33    1.32
  -3   3   7   21.12    1.51
  -3   3   7   24.01    1.47
   2  -3  -7    2.38    0.68
  -2  -3   7    3.54    0.85
  -2  -3   7    2.63    1.04
  -2  -3   7    2.78    0.86
   2  -3  -7    3.58    0.82
   2  -3  -7    4.27    0.65
  -2   3   7    2.72    0.55
  -2   3   7    3.65    0.62
   2   3  -7    3.34    1.37
  -2   3   7    2.21    0.54
  -2   3   7    3.95    0.54
  -1  -3   7   36.19    2.81
   1  -3  -7   35.59    1.74
   1  -3  -7   37.08    2.14
  -1  -3   7   35.10    2.38
   1  -3  -7   35.59    2.12
  -1  -3   7   36.95    2.46
  -1   3   7   34.27    1.72
  -1   3   7   32.72    1.91
   1   3  -7   34.98    3.33
  -1   3   7   39.51    2.03
   0  -3   7    6.81    1.22
   0  -3  -7    8.26    0.89
   0   3  -7    7.77    1.77
   0   3   7    7.59    0.74
  -1  -3  -7   69.50    3.53
   1  -3   7   71.18    3.87
   1   3   7   69.78    2.80
  -1   3  -7   77.48    5.32
   2  -3   7    1.56    0.79
   2  -3   7    1.45    0.70
   2  -3   7    0.68    0.73
  -2  -3  -7    2.65    0.55
   2   3   7    1.65    0.41
  -2   3  -7    1.67    1.10
   3  -3   7   32.19    2.35
   3  -3   7   31.15    2.12
  -3  -3  -7   31.20    1.83
  -3   3  -7   30.51    1.85
   3   3   7   32.04    1.45
   4  -3   7  123.58    5.80
   4  -3   7  119.18    5.15
  -4  -3  -7  115.79    5.42
   4   3   7  120.28    4.37
   4   3   7  112.66    4.45
  -4   3  -7  113.85    4.91
   5  -3   7   20.86    2.00
   5  -3   7   21.34    1.74
  -5  -3  -7   24.32    1.67
  -5  -3  -7   20.88    1.53
  -5   3  -7   25.00    1.69
   5   3   7   27.57    1.31
   5   3   7   27.18    1.36
  -6  -3  -7    0.49    0.53
   6  -3   7    0.40    0.72
   6  -3   7    0.34    0.53
   6   3   7    0.51    0.37
   6   3   7   -0.29    0.36
  -6   3  -7   -0.26    0.46
   7  -3   7    8.71    1.36
   7  -3   7    9.22    0.96
  -7   3  -7    8.70    0.94
   7   3   7    7.76    0.73
   7   3   7    7.51    0.94
   8  -3   7    3.11    0.48
   8  -3   7    3.90    0.90
   8  -3   7    2.98    0.86
  -8   3  -7    3.89    0.59
   8   3   7    3.82    0.52
   8   3   7    4.24    0.70
   9  -3   7   12.86    1.24
  -9   3  -7   14.73    0.85
   9   3   7   13.57    0.95
   9   3   7   14.33    0.89
   9   3   7   13.13    0.80
 -10  -4   7   18.21    1.25
  10  -4  -7   17.41    1.29
 -10  -4   7   19.22    1.27
  10   4  -7   19.11    1.09
  10   4  -7   19.22    1.02
 -10   4   7   17.33    0.96
 -10   4   7   19.31    0.95
  -9  -4   7    0.86    0.53
   9   4  -7    0.30    0.42
   9   4  -7    0.78    0.51
   9   4  -7    0.38    0.42
  -9   4   7    0.83    0.45
  -9   4   7    0.27    0.34
  -9   4   7    0.09    0.32
  -8  -4   7   23.00    1.58
  -8   4   7   21.96    1.52
   8   4  -7   22.96    1.43
   8   4  -7   20.20    1.54
  -8   4   7   18.98    1.17
   8   4  -7   21.05    1.46
   8   4  -7   22.03    1.39
   8   4  -7   17.67    1.16
   8   4  -7   17.96    1.11
  -8   4   7   20.77    1.25
  -7  -4   7   13.72    1.35
  -7   4   7   11.96    1.22
  -7   4   7    8.55    1.15
   7   4  -7   12.47    1.17
  -7   4   7   13.18    0.98
   7   4  -7   13.81    1.09
   7   4  -7   11.49    1.09
   7   4  -7   13.38    1.39
   7   4  -7   12.84    1.18
  -7   4   7   12.98    0.98
  -7   4   7   10.95    1.38
   7   4  -7   13.18    1.22
  -6  -4   7   29.07    2.15
  -6  -4   7   31.28    2.29
   6  -4  -7   29.52    2.55
  -6   4   7   29.67    2.03
  -6   4   7   31.26    2.34
  -6   4   7   34.14    1.94
  -6   4   7   31.91    1.67
   6   4  -7   32.69    1.96
  -6   4   7   31.83    1.60
   6   4  -7   35.20    1.87
   6   4  -7   33.47    1.84
   6   4  -7   33.09    1.96
   6   4  -7   32.79    2.17
   6   4  -7   34.66    2.02
   6   4  -7   32.92    3.27
  -5  -4   7   10.04    1.44
   5  -4  -7   13.77    1.57
  -5  -4   7   13.99    1.55
   5   4  -7    9.55    1.15
   5   4  -7   10.51    1.29
   5   4  -7    9.85    2.10
   5   4  -7   10.24    1.03
   5   4  -7   11.72    1.15
   5   4  -7   12.65    1.40
  -5   4   7   11.15    1.05
  -5   4   7   10.18    0.83
   5   4  -7   10.70    1.10
   5   4  -7   10.71    1.25
  -5   4   7    9.13    0.83
  -5   4   7   10.40    1.13
   4  -4  -7   42.07    2.58
  -4  -4   7   35.19    2.35
   4  -4  -7   36.36    2.53
  -4  -4   7   34.14    2.49
  -4  -4   7   38.74    2.50
  -4   4   7   33.43    1.92
   4   4  -7   34.44    2.01
   4   4  -7   33.31    2.19
   4   4  -7   33.65    2.21
  -4   4   7   30.54    1.78
   4   4  -7   31.41    1.98
   4   4  -7   37.49    2.05
   4   4  -7   37.66    3.68
  -4   4   7   33.27    1.47
   4   4  -7   33.74    1.94
  -4   4   7   31.53    2.14
   4   4  -7   32.52    2.28
  -3  -4   7    7.16    1.23
  -3  -4   7    4.25    0.99
   3  -4  -7    8.61    1.20
  -3  -4   7    6.97    1.29
   3  -4  -7    6.58    1.15
   3   4  -7    8.01    0.99
   3   4  -7    6.45    0.95
   3   4  -7    8.62    1.21
   3   4  -7    7.16    1.07
  -3   4   7    6.52    0.84
   3   4  -7    7.25    1.01
  -3   4   7    6.47    0.94
   3   4  -7    7.18    1.09
   3   4  -7    7.02    1.84
  -3   4   7    7.59    0.81
   3   4  -7    6.92    1.02
  -2  -4   7   34.40    2.54
  -2  -4   7   31.43    2.41
  -2  -4   7   34.09    2.44
  -2  -4   7   32.59    2.42
   2  -4  -7   35.85    2.27
  -2  -4   7   40.03    2.67
   2  -4  -7   34.67    2.22
   2   4  -7   30.94    2.14
  -2   4   7   33.64    1.71
  -2   4   7   29.04    3.23
   2   4  -7   30.08    2.50
   2   4  -7   35.11    3.50
   2   4  -7   36.59    2.06
   2   4  -7   33.38    2.03
   2   4  -7   36.62    2.29
  -2   4   7   33.40    1.96
   2   4  -7   30.73    2.16
   2   4  -7   35.38    1.99
  -2   4   7   36.53    1.81
  -1  -4   7    8.49    1.45
  -1  -4   7    8.73    1.33
   1  -4  -7    6.93    1.02
  -1  -4   7   10.14    1.40
  -1  -4   7    8.41    1.26
   1   4  -7    7.59    1.75
  -1   4   7    7.49    0.85
   1   4  -7    6.90    0.99
   1   4  -7    7.29    1.06
   1   4  -7    5.80    1.10
  -1   4   7    4.45    1.46
   1   4  -7    6.27    0.95
  -1   4   7    9.25    0.79
  -1   4   7    8.51    0.85
   1   4  -7    7.64    1.16
   1   4  -7    8.30    1.12
   0  -4  -7   39.47    2.32
   0  -4   7   39.45    2.66
   0  -4   7   38.89    2.69
   0  -4   7   40.81    2.77
   0  -4   7   43.22    2.78
   0   4  -7   39.55    2.42
   0   4   7   39.32    1.78
   0   4  -7   37.64    2.50
   0   4  -7   41.94    3.72
   0   4  -7   36.78    2.33
   0   4   7   39.08    1.88
   0   4  -7   38.39    2.34
   1  -4   7    3.98    0.87
   1  -4   7    3.30    1.02
   1  -4   7    3.14    0.96
  -1   4  -7    3.00    0.74
   1   4   7    4.25    0.50
  -1   4  -7    4.05    0.81
  -1   4  -7    4.42    0.96
  -1   4  -7    2.50    1.15
  -1   4  -7    4.37    0.99
   2  -4   7   13.58    1.62
   2  -4   7   13.79    1.43
  -2   4  -7   13.57    1.51
  -2   4  -7   14.02    1.42
  -2   4  -7   11.83    1.26
  -2   4  -7   14.72    2.12
  -2   4  -7   16.23    1.61
   3  -4   7    8.34    1.39
   3  -4   7    9.39    1.27
  -3   4  -7    7.20    0.94
  -3   4  -7    7.68    1.35
   4  -4   7    9.07    1.34
   4  -4   7   10.72    1.28
  -4   4  -7   11.49    1.10
   5  -4   7    7.76    1.30
   5  -4   7    7.26    1.03
   5   4   7    5.49    0.60
   5   4   7    5.82    0.87
   6  -4   7   19.56    1.53
   6  -4   7   19.31    1.75
   6   4   7   21.43    1.32
   7  -4   7    6.30    1.13
   7  -4   7    6.89    0.82
   7   4   7    7.95    0.85
   8  -4   7    6.94    0.59
   8   4   7    6.94    0.75
   8   4   7    7.76    0.61
  -8  -5   7    5.09    0.72
  -8  -5   7    5.82    0.82
   8   5  -7    6.47    0.74
  -8   5   7    6.91    0.74
  -7  -5   7   25.86    1.67
   7   5  -7   24.53    1.43
  -7   5   7   24.06    1.41
  -7   5   7   21.29    1.52
   7   5  -7   21.84    1.28
   7   5  -7   22.66    1.43
  -7   5   7   23.32    1.53
   7   5  -7   25.04    1.38
  -6  -5   7    1.44    0.73
  -6  -5   7    2.88    0.79
  -6  -5   7    1.24    0.72
   6   5  -7    2.68    0.60
  -6   5   7    1.08    0.69
  -6   5   7    2.05    0.54
   6   5  -7    2.28    0.54
  -6   5   7    2.16    0.65
   6   5  -7    1.09    0.58
   6   5  -7    0.62    0.54
  -5  -5   7   15.22    1.61
  -5  -5   7   15.06    1.66
  -5  -5   7   16.97    1.51
   5  -5  -7   14.12    1.75
   5   5  -7   13.87    1.44
   5   5  -7   15.09    1.18
   5   5  -7   15.32    1.22
   5   5  -7   14.66    2.10
  -5   5   7   14.98    1.10
  -5   5   7   14.25    1.25
   5   5  -7   16.23    1.32
  -4  -5   7    0.46    0.71
  -4  -5   7    0.19    0.90
  -4  -5   7    0.59    0.76
   4  -5  -7    1.25    0.76
  -4  -5   7    0.91    0.89
   4   5  -7    1.42    0.42
  -4   5   7    1.18    0.52
   4   5  -7    1.03    1.02
   4   5  -7    1.74    0.56
   4   5  -7    0.03    0.61
   4   5  -7    0.70    0.62
   4   5  -7    1.35    0.38
   4   5  -7    1.72    0.54
  -4   5   7    0.39    0.39
  -3  -5   7   16.50    1.73
  -3  -5   7   14.38    1.73
  -3  -5   7   15.12    1.60
  -3  -5   7   15.78    1.73
   3  -5  -7   19.29    1.77
   3   5  -7   18.03    1.42
  -3   5   7   16.66    1.08
   3   5  -7   15.11    2.30
   3   5  -7   13.08    1.08
   3   5  -7   14.02    1.16
   3   5  -7   17.62    1.57
   3   5  -7   18.65    1.33
   3   5  -7   16.39    1.31
  -3   5   7   17.84    1.23
  -2  -5   7    2.51    1.00
  -2  -5   7    1.79    0.86
   2  -5  -7    3.40    0.94
  -2  -5   7    1.72    0.83
  -2  -5   7    1.65    0.82
   2   5  -7    2.09    0.53
   2   5  -7    3.03    0.75
  -2   5   7    2.77    0.47
  -2   5   7    1.73    0.50
   2   5  -7    1.90    1.11
   2   5  -7    1.80    0.59
   2   5  -7    1.97    0.54
   2   5  -7    2.03    0.82
   2   5  -7    2.71    0.63
  -1  -5   7   33.25    2.39
   1  -5  -7   31.29    2.19
  -1  -5   7   27.38    2.37
  -1  -5   7   32.50    2.40
  -1  -5   7   32.85    2.44
  -1   5   7   34.86    1.71
   1   5  -7   30.42    3.17
  -1   5   7   35.59    1.51
   1   5  -7   30.78    1.98
   1   5  -7   29.11    1.75
   1   5  -7   33.95    1.90
   1   5  -7   30.63    1.94
   1   5  -7   36.80    1.97
   1   5  -7   34.40    2.29
   0  -5   7    0.03    0.74
   0  -5   7    1.04    0.78
   0  -5   7    1.67    0.71
   0   5  -7    1.31    0.55
   0   5  -7    1.55    0.61
   0   5  -7    0.75    0.81
   0   5  -7    0.85    0.55
   0   5   7    1.27    0.48
   0   5  -7    1.29    0.69
   1  -5   7    7.29    1.24
   1  -5   7    8.29    1.20
  -1   5  -7    7.04    0.91
  -1   5  -7    8.21    1.02
  -1   5  -7    9.14    1.29
  -1   5  -7    8.22    1.08
  -1   5  -7    6.69    1.53
   2  -5   7    5.06    1.07
   2  -5   7    6.17    0.97
  -2   5  -7    7.23    0.96
  -2   5  -7    6.17    0.86
  -2   5  -7    5.97    1.45
  -2   5  -7    7.79    0.93
  -2   5  -7    6.38    1.12
   3  -5   7   22.90    1.93
   3  -5   7   24.15    1.74
  -3   5  -7   22.93    1.67
  -3   5  -7   23.15    1.94
  -3   5  -7   25.24    1.48
  -3   5  -7   23.28    1.58
   4  -5   7   -0.48    0.70
  -4   5  -7    1.11    0.51
  -4   5  -7   -0.16    0.65
  -4   5  -7    1.10    0.54
  -4   5  -7    1.17    0.46
   5  -5   7    2.91    0.72
  -5   5  -7    3.78    0.88
  -5   5  -7    2.53    0.56
  -5   5  -7    3.69    0.76
   6  -5   7    4.14    0.63
  -6   5  -7    3.17    0.52
  -6   5  -7    4.67    0.69
  -5  -6   7    0.26    0.53
  -5  -6   7    0.79    0.53
  -5   6   7    0.28    0.36
  -5   6   7    0.51    0.45
  -4  -6   7   11.46    1.16
  -4  -6   7   11.39    1.13
  -4   6   7   11.91    0.93
   4   6  -7   14.05    0.93
   4   6  -7   13.32    0.96
  -4   6   7   13.39    0.72
   4   6  -7   12.60    0.91
  -3  -6   7   -0.04    0.54
  -3  -6   7   -0.01    0.47
   3   6  -7    0.02    0.36
  -3   6   7    0.23    0.37
   3   6  -7    0.08    0.38
   3   6  -7    0.33    0.41
   3   6  -7    0.06    0.62
  -2  -6   7    4.94    0.77
  -2  -6   7    6.36    0.84
   2   6  -7    4.95    0.68
   2   6  -7    3.30    0.56
   2   6  -7    1.73    0.43
  -2   6   7    3.65    0.52
   2   6  -7    2.34    0.95
   2   6  -7    3.03    0.53
  -1  -6   7    1.81    0.59
  -1   6   7    1.64    0.42
   1   6  -7    0.74    0.66
   1   6  -7    1.10    0.42
   1   6  -7    1.08    0.45
   1   6  -7    2.56    0.55
   1   6  -7    2.05    0.50
   0  -6   7    7.68    0.93
   0   6  -7    6.11    0.76
   0   6  -7    7.08    0.83
   0   6  -7    3.58    1.02
   0   6  -7    6.75    0.85
   1  -6   7    2.21    0.56
  -1   6  -7    1.21    0.68
  -1   6  -7    2.02    0.55
  -1   6  -7    1.90    0.42
  -1   6  -7    1.11    0.48
   2  -6   7   13.02    1.10
  -2   6  -7   13.52    0.93
  -2   6  -7   11.91    1.04
  -3   6  -7    2.65    0.52
  12   0  -8    8.82    0.97
 -12   0   8    8.54    0.69
 -11   0   8   12.52    1.07
  11   0  -8   12.64    1.40
 -10   0   8    7.99    1.00
  10   0  -8    7.98    0.82
  -9   0   8   11.64    1.24
   9   0  -8   11.75    1.13
   8   0  -8   24.63    1.73
  -8   0   8   23.18    1.81
  -8   0   8   25.44    1.70
   7   0  -8   85.93    6.27
   6   0  -8   46.84    4.15
   5   0  -8   24.46    1.77
  -5   0   8   22.05    1.53
   5   0  -8   25.26    2.81
   4   0  -8   52.96    4.17
   4   0  -8   52.01    3.19
   4   0  -8   49.37    2.98
   3   0  -8   77.70    4.20
   3   0  -8   78.59    4.43
  -2   0   8    1.80    0.67
   2   0  -8    2.07    0.58
   2   0  -8    1.25    0.56
   2   0  -8    2.14    0.69
   2   0  -8    1.88    0.48
   1   0  -8   60.10    3.33
  -1   0   8   54.92    3.19
   1   0  -8   59.95    3.50
   1   0  -8   60.58    2.71
   1   0  -8   60.32    3.14
   0   0  -8   51.61    2.38
   0   0  -8   51.60    3.08
   0   0  -8   49.73    2.73
   0   0   8   48.00    2.81
   0   0  -8   50.07    2.92
  -1   0  -8   29.75    1.60
  -1   0  -8   29.04    2.09
  -1   0  -8   30.42    1.88
  -2   0  -8   29.58    1.63
  -2   0  -8   29.94    1.91
  -2   0  -8   28.84    2.12
  -3   0  -8   15.31    1.32
  -3   0  -8   13.40    1.03
   3   0   8   14.12    1.47
   3   0   8    9.75    1.22
   4   0   8    3.33    0.94
   4   0   8    3.85    0.69
  -4   0  -8    3.49    0.67
  -4   0  -8    2.85    0.76
   4   0   8    2.49    0.78
   5   0   8    0.63    0.74
   5   0   8    1.43    0.65
   5   0   8    0.25    0.83
   5   0   8    1.19    0.62
   5   0   8    1.94    0.61
  -5   0  -8    1.92    0.71
   5   0   8    1.82    0.70
  -5   0  -8    1.48    0.57
   6   0   8   39.48    2.20
   6   0   8   39.34    2.15
   6   0   8   42.65    2.68
   6   0   8   39.92    2.13
  -6   0  -8   40.30    2.24
   6   0   8   39.08    2.65
  -6   0  -8   42.25    2.75
   6   0   8   40.50    2.24
   7   0   8   61.51    2.77
   7   0   8   60.31    3.33
  -7   0  -8   58.66    3.03
   7   0   8   60.12    2.92
   7   0   8   60.82    2.81
   7   0   8   60.57    3.38
   8   0   8    4.69    0.94
   8   0   8    6.15    0.76
   8   0   8    3.93    0.96
   9   0   8    0.04    0.33
   9   0   8   -0.45    0.46
   9   0   8    0.20    0.57
  10   0   8   17.05    0.80
  10   0   8   17.22    1.16
  12  -1  -8   14.80    1.32
 -12  -1   8   15.63    1.03
  12   1  -8   13.64    1.23
  12   1  -8   15.24    0.96
  12   1  -8   15.19    1.16
  11  -1  -8   18.48    1.11
 -11  -1   8   16.25    1.36
  11   1  -8   18.45    1.33
  11   1  -8   17.78    1.52
 -11   1   8   18.85    0.92
  11   1  -8   17.45    1.63
 -10  -1   8   29.70    1.93
  10  -1  -8   28.34    1.72
 -10   1   8   29.91    1.54
  10   1  -8   27.90    2.03
   9  -1  -8   27.55    1.91
  -9  -1   8   26.06    2.00
   9   1  -8   27.09    1.40
  -9   1   8   26.77    1.58
   9   1  -8   27.03    2.14
   8  -1  -8   16.17    2.72
   8   1  -8   18.49    1.28
  -8   1   8   18.84    1.39
   8   1  -8   20.29    1.42
   8   1  -8   19.00    2.04
   7  -1  -8   10.31    2.15
  -7  -1   8    8.47    1.28
  -7   1   8   10.86    1.11
  -7   1   8    8.99    1.13
   7   1  -8   10.31    1.14
   7   1  -8   10.20    1.04
   7   1  -8   10.62    2.29
   6  -1  -8   19.37    2.63
   6   1  -8   23.16    2.94
   5  -1  -8   12.03    1.33
   5  -1  -8   12.57    2.12
   5   1  -8   13.24    1.17
   5   1  -8   14.25    2.26
   4  -1  -8   59.24    3.60
  -4  -1   8   57.41    3.51
   4  -1  -8   64.03    3.51
   4   1  -8   76.37    5.08
   4   1  -8   62.22    3.38
  -4   1   8   61.10    3.55
   3  -1  -8   27.28    2.11
  -3  -1   8   27.86    1.90
   3  -1  -8   31.05    1.99
  -3   1   8   27.48    1.84
   3   1  -8   31.60    2.99
  -3   1   8   24.13    1.92
   3   1  -8   26.45    1.81
   2  -1  -8   12.05    0.87
   2  -1  -8   11.07    1.24
   2  -1  -8   11.71    1.13
  -2  -1   8   12.27    1.09
   2   1  -8    9.79    1.00
  -2   1   8    9.64    1.10
  -2   1   8    7.96    1.03
  -1  -1   8   90.11    4.83
   1  -1  -8   96.32    5.36
   1  -1  -8  102.38    4.08
   1  -1  -8  100.74    4.69
   1   1  -8  102.58    5.27
   1   1  -8   92.00    4.94
  -1   1   8   91.57    4.64
   0  -1  -8   28.50    2.08
   0  -1  -8   30.28    1.52
   0  -1   8   29.12    1.76
   0  -1  -8   30.72    1.80
   0   1   8   24.13    1.73
   0   1  -8   27.91    2.00
   0   1  -8   27.24    1.89
  -1  -1  -8   39.95    2.23
  -1  -1  -8   38.67    1.91
   1  -1   8   37.52    2.39
  -1  -1  -8   36.42    2.54
  -1   1  -8   39.92    2.43
  -1   1  -8   40.19    2.56
  -2  -1  -8   37.71    2.54
  -2  -1  -8   38.81    1.91
   2  -1   8   38.97    2.41
  -2  -1  -8   40.44    2.22
   2   1   8   36.63    1.85
  -2   1  -8   37.72    2.56
  -2   1  -8   36.01    2.40
  -3  -1  -8   38.42    2.18
   3  -1   8   36.26    2.40
  -3  -1  -8   33.96    1.84
   3   1   8   37.52    1.86
  -3   1  -8   33.74    2.38
   3   1   8   37.11    1.82
  -4  -1  -8   45.01    2.31
   4  -1   8   47.82    2.88
  -4  -1  -8   48.47    2.68
   4   1   8   44.54    2.20
   4   1   8   47.91    2.29
   4   1   8   45.51    2.18
  -5  -1  -8   12.70    1.08
  -5  -1  -8   13.27    1.29
   5  -1   8   13.31    1.47
   5  -1   8   12.34    1.40
   5  -1   8   11.54    0.99
   5   1   8   13.75    1.54
   5   1   8   11.85    1.05
   5   1   8   11.70    1.31
   5   1   8   11.58    1.01
   5   1   8   11.14    1.02
  -6  -1  -8   13.32    1.15
  -6  -1  -8   11.99    1.35
   6  -1   8   14.95    1.60
   6  -1   8   18.32    1.44
   6  -1   8   14.01    1.48
   6   1   8   15.21    1.21
   6   1   8   13.00    1.61
   6   1   8   14.63    1.08
   6   1   8   13.15    1.44
   6   1   8   13.78    1.12
  -7  -1  -8    2.31    0.66
   7  -1   8    3.74    0.80
   7  -1   8    3.65    0.78
   7  -1   8    2.75    0.84
   7   1   8    3.93    0.72
   7   1   8    2.69    0.90
   7   1   8    3.84    0.55
   7   1   8    2.45    0.77
   8  -1   8   14.06    1.27
   8  -1   8   16.13    1.53
   8  -1   8   14.94    1.82
   8  -1   8   15.43    1.19
   8   1   8   14.40    1.14
   8   1   8   12.40    1.22
   8   1   8   14.25    0.84
   8   1   8   14.88    1.19
   8   1   8   14.22    1.56
   9  -1   8    5.84    0.62
   9  -1   8    2.96    0.81
   9  -1   8    4.16    0.92
   9  -1   8    3.09    0.58
   9   1   8    3.39    0.68
   9   1   8    3.33    0.62
   9   1   8    3.24    0.56
   9   1   8    2.15    0.79
   9   1   8    5.17    0.75
  10  -1   8   12.36    0.83
  10  -1   8   13.16    1.14
 -10   1  -8   11.59    1.02
  10   1   8   12.25    0.93
  10   1   8   11.45    0.70
 -11  -2   8   18.98    1.43
  11  -2  -8   20.73    1.20
 -11   2   8   19.00    1.59
  11   2  -8   18.53    1.29
  11   2  -8   20.52    1.26
  11   2  -8   15.67    1.61
  10  -2  -8   32.61    2.01
  10   2  -8   37.69    2.52
  10   2  -8   34.75    1.98
  10   2  -8   35.71    2.12
  10   2  -8   34.90    1.99
  10   2  -8   35.86    1.74
  -9  -2   8   23.26    1.61
  -9   2   8   20.81    1.73
  -9   2   8   21.79    1.83
   9   2  -8   21.77    1.67
   9   2  -8   22.12    1.62
   9   2  -8   20.89    1.84
   9   2  -8   24.09    1.43
   8  -2  -8    6.39    1.87
  -8  -2   8    4.85    0.85
   8   2  -8    3.59    0.94
   8   2  -8    7.04    0.90
   8   2  -8    4.84    0.87
  -8   2   8    4.21    0.91
  -8   2   8    4.08    0.84
   8   2  -8    4.76    1.00
  -8   2   8    5.12    0.83
  -7  -2   8   15.21    1.36
   7   2  -8   14.57    1.79
   7   2  -8   16.38    1.26
   7   2  -8   16.22    1.53
  -7   2   8   14.63    1.48
   7   2  -8   11.67    0.91
  -7   2   8   15.60    1.50
  -7   2   8   13.27    1.37
   7   2  -8   14.64    2.56
  -6  -2   8   37.59    2.26
  -6   2   8   40.52    2.42
  -6   2   8   39.59    2.30
   6   2  -8   36.24    1.87
   6   2  -8   38.02    2.10
   6   2  -8   38.16    3.80
   6   2  -8   35.27    2.41
  -6   2   8   34.83    2.14
  -5  -2   8   25.13    1.87
   5  -2  -8   24.75    2.24
  -5   2   8   27.12    1.82
   5   2  -8   30.90    3.31
  -5   2   8   27.01    1.80
  -5   2   8   27.80    1.76
  -5   2   8   23.58    1.89
   4  -2  -8   15.68    1.68
  -4   2   8   17.10    1.36
   4   2  -8   17.03    2.42
  -4   2   8   13.59    1.45
  -4   2   8   16.23    1.32
   3  -2  -8   10.00    1.32
  -3  -2   8   11.42    1.37
   3   2  -8   11.94    2.15
  -3   2   8    8.40    1.14
  -3   2   8   10.74    1.06
  -3   2   8    9.96    1.20
   2  -2  -8   37.98    1.86
  -2  -2   8   37.74    2.60
   2  -2  -8   33.73    2.35
  -2  -2   8   38.52    2.45
  -2   2   8   34.02    2.20
   2   2  -8   42.06    3.54
  -2   2   8   36.31    1.92
   1  -2  -8  108.47    4.31
  -1  -2   8  102.09    5.52
  -1  -2   8  106.10    5.00
   1  -2  -8  101.21    5.05
   1   2  -8   95.70    5.06
  -1   2   8   99.47    4.07
  -1   2   8   97.94    4.83
   1   2  -8  115.59    7.01
   0  -2  -8   24.49    1.39
   0  -2   8   26.80    2.00
   0  -2  -8   26.20    1.76
   0  -2   8   24.88    2.03
   0   2  -8   31.23    2.95
   0   2  -8   27.78    1.75
   0   2   8   24.65    1.62
   0   2   8   27.15    1.43
   1  -2   8   18.10    1.68
   1  -2   8   15.20    1.53
  -1  -2  -8   17.46    1.28
  -1  -2  -8   16.18    1.03
  -1   2  -8   13.76    2.19
   1   2   8   13.17    1.00
  -1   2  -8   14.85    1.30
  -2  -2  -8    6.26    0.83
  -2  -2  -8    5.64    0.64
   2  -2   8    6.35    1.14
   2   2   8    6.03    0.70
   2   2   8    5.28    0.68
   3  -2   8   26.41    2.02
  -3  -2  -8   24.79    1.62
  -3  -2  -8   26.28    1.45
   3   2   8   23.44    1.31
   3   2   8   20.39    1.31
   4  -2   8   25.56    1.70
   4  -2   8   24.93    2.08
  -4  -2  -8   25.15    1.52
  -4  -2  -8   26.94    1.72
   4   2   8   24.11    1.44
   4   2   8   24.54    1.42
   4   2   8   22.27    1.64
  -5  -2  -8   13.78    1.31
  -5  -2  -8   12.69    1.09
   5  -2   8   12.77    1.18
   5  -2   8   14.25    1.57
   5   2   8   11.74    1.16
   5   2   8   12.45    0.98
   5   2   8   11.08    0.96
  -6  -2  -8   12.02    1.08
   6  -2   8   10.46    1.02
   6  -2   8   12.28    1.45
   6  -2   8   13.02    1.60
   6   2   8   12.52    1.05
   6   2   8   11.79    1.03
   6   2   8   10.95    0.95
   7  -2   8    5.32    1.04
   7  -2   8    6.41    1.09
  -7   2  -8    5.68    0.92
   7   2   8    6.50    0.78
   7   2   8    7.00    0.74
   7   2   8    5.82    1.17
   7   2   8    7.84    0.80
   8  -2   8   30.46    2.03
   8  -2   8   28.20    1.81
   8   2   8   26.29    1.47
  -8   2  -8   27.82    1.76
   8   2   8   26.87    1.48
   9  -2   8   18.60    1.24
   9  -2   8   18.49    1.30
   9  -2   8   19.30    1.47
  -9   2  -8   17.67    1.22
   9   2   8   18.24    1.10
   9   2   8   17.88    1.08
 -10   2  -8    2.72    0.41
  11  -3  -8    3.88    0.51
 -11   3   8    4.13    0.53
 -11   3   8    3.81    0.59
  11   3  -8    5.97    0.77
  10  -3  -8    1.21    0.59
 -10  -3   8    2.01    0.61
  10   3  -8    2.01    0.48
  10   3  -8    1.76    0.44
 -10   3   8    1.68    0.53
  10   3  -8    1.42    0.44
 -10   3   8    0.84    0.47
  10   3  -8    1.51    0.59
  -9  -3   8    4.12    0.78
   9   3  -8    7.07    0.86
  -9   3   8    7.57    0.98
   9   3  -8    6.43    0.83
   9   3  -8    6.35    0.80
   9   3  -8    6.53    0.95
  -9   3   8    8.76    0.98
  -9   3   8    7.04    0.80
  -8  -3   8   10.07    1.20
   8  -3  -8   10.14    2.16
   8   3  -8   10.02    1.11
   8   3  -8   11.73    1.22
   8   3  -8   11.81    1.04
   8   3  -8   12.44    1.06
  -8   3   8   11.95    1.19
   8   3  -8   14.35    1.48
  -8   3   8   11.03    1.21
  -8   3   8   11.77    1.11
  -7  -3   8    4.09    0.84
   7   3  -8    2.30    0.72
  -7   3   8    2.98    0.67
  -7   3   8    3.98    0.72
  -7   3   8    3.42    0.84
   7   3  -8    4.24    0.86
   7   3  -8    2.37    0.84
   7   3  -8    3.75    0.72
   7   3  -8    3.04    0.72
   7   3  -8    2.31    1.46
  -6  -3   8   26.73    1.88
  -6   3   8   25.15    2.06
  -6   3   8   23.98    1.64
   6   3  -8   25.19    1.65
   6   3  -8   26.29    1.79
   6   3  -8   26.65    1.89
   6   3  -8   25.20    3.05
  -6   3   8   24.24    1.88
   6   3  -8   26.64    2.12
   6   3  -8   28.55    1.90
  -6   3   8   26.30    1.60
  -6   3   8   23.74    1.71
  -5  -3   8    3.75    0.90
   5  -3  -8    4.55    1.19
   5  -3  -8    2.42    1.07
   5   3  -8    4.45    0.94
  -5   3   8    2.52    0.79
   5   3  -8    4.52    0.86
   5   3  -8    4.66    0.97
  -5   3   8    5.69    0.89
  -5   3   8    4.42    0.88
   5   3  -8    4.50    0.84
   5   3  -8    3.16    1.52
  -5   3   8    4.51    0.72
  -5   3   8    4.45    0.71
   4  -3  -8   13.72    1.59
   4  -3  -8   13.77    1.51
  -4  -3   8   12.65    1.39
   4   3  -8   12.44    1.41
  -4   3   8   10.28    1.22
  -4   3   8   10.81    1.02
   4   3  -8    7.60    2.00
  -4   3   8   11.95    1.09
  -4   3   8   11.45    1.24
  -4   3   8   10.42    0.98
   4   3  -8   10.98    1.37
   4   3  -8   11.11    1.27
  -3  -3   8   20.35    1.85
   3  -3  -8   20.86    1.79
   3  -3  -8   21.56    1.88
  -3  -3   8   20.29    1.93
  -3  -3   8   22.38    1.99
  -3   3   8   21.04    1.59
  -3   3   8   23.71    1.27
  -3   3   8   22.74    1.59
   3   3  -8   21.63    1.83
   3   3  -8   23.69    1.90
   3   3  -8   22.34    1.94
  -3   3   8   22.71    1.32
   3   3  -8   19.22    2.69
  -3   3   8   22.53    1.41
   3   3  -8   20.99    1.62
   2  -3  -8   38.87    2.46
  -2  -3   8   37.74    2.45
  -2  -3   8   37.41    2.52
  -2  -3   8   41.72    2.70
   2  -3  -8   37.78    2.52
  -2   3   8   38.19    1.94
  -2   3   8   38.22    1.68
  -2   3   8   39.75    2.08
   2   3  -8   38.09    2.22
   2   3  -8   41.29    3.70
   1  -3  -8    2.85    0.84
  -1  -3   8    1.59    0.88
   1  -3  -8    2.90    0.75
  -1  -3   8    1.80    0.90
  -1  -3   8    4.18    0.89
   1  -3  -8    2.66    0.52
  -1   3   8    2.66    0.57
  -1   3   8    1.95    0.63
   1   3  -8    3.56    1.37
   1   3  -8    2.76    0.76
   0  -3  -8    8.77    1.33
   0  -3   8   10.86    1.29
   0  -3  -8   11.08    0.85
   0  -3   8   11.27    1.40
   0  -3  -8    8.80    1.23
   0  -3   8    9.91    1.42
   0   3  -8    9.05    1.16
   0   3   8    7.18    0.90
   0   3   8    9.91    0.83
   0   3  -8    9.85    1.93
   1  -3   8   49.40    2.84
  -1  -3  -8   50.64    2.71
   1  -3   8   50.94    3.03
   1  -3   8   47.78    2.72
  -1  -3  -8   47.55    2.24
  -1   3  -8   47.88    4.07
  -1   3  -8   46.34    2.47
   1   3   8   46.09    2.06
   1   3   8   44.41    2.24
   2  -3   8   64.03    3.31
  -2  -3  -8   66.44    3.25
   2  -3   8   68.59    3.69
   2   3   8   61.67    2.55
   2   3   8   62.36    2.67
  -2   3  -8   56.61    2.92
  -2   3  -8   61.63    2.96
  -3  -3  -8   19.48    1.48
  -3  -3  -8   21.39    1.33
   3  -3   8   23.50    2.02
   3  -3   8   19.76    1.73
   3   3   8   19.77    1.18
  -3   3  -8   20.12    1.52
   3   3   8   21.47    1.15
  -4  -3  -8   26.98    1.57
  -4  -3  -8   28.75    1.86
   4  -3   8   26.81    1.85
   4  -3   8   27.02    2.16
  -4   3  -8   25.02    1.72
   4   3   8   25.68    1.34
   4   3   8   24.55    1.39
   5  -3   8    2.53    0.65
   5  -3   8    1.58    0.83
  -5  -3  -8    1.01    0.56
  -5   3  -8    1.21    0.60
   5   3   8    0.80    0.41
   5   3   8    1.02    0.41
   6  -3   8   22.82    1.81
   6  -3   8   21.77    1.44
  -6   3  -8   19.45    1.40
   6   3   8   19.51    1.13
   6   3   8   19.31    1.18
   7  -3   8    1.97    0.77
   7  -3   8    1.79    0.41
   7   3   8    3.09    0.63
  -7   3  -8    2.98    0.57
   7   3   8    2.57    0.44
   8  -3   8   11.64    1.18
   8  -3   8   12.29    1.25
   8   3   8   11.70    0.92
  -8   3  -8   12.40    0.88
   8   3   8   12.94    0.77
   9  -3   8    1.79    0.45
   9   3   8    1.73    0.32
  -9  -4   8    4.09    0.70
  -9  -4   8    4.90    0.72
   9   4  -8    6.22    0.69
   9   4  -8    6.67    0.78
  -9   4   8    6.34    0.64
  -9   4   8    5.45    0.51
  -9   4   8    5.52    0.52
  -8  -4   8    9.24    1.07
  -8  -4   8    7.63    1.06
   8   4  -8    7.71    0.71
  -8   4   8    8.03    0.94
  -8   4   8    8.38    0.67
   8   4  -8    7.78    0.89
   8   4  -8    8.88    0.99
   8   4  -8    7.34    0.75
   8   4  -8    6.50    0.95
  -8   4   8    6.79    0.66
  -7  -4   8   24.24    1.66
  -7  -4   8   22.96    1.73
   7   4  -8   21.87    1.48
  -7   4   8   21.33    1.55
   7   4  -8   22.78    1.59
   7   4  -8   23.74    1.48
  -7   4   8   22.54    1.20
  -7   4   8   21.05    1.16
  -7   4   8   22.69    1.67
   7   4  -8   22.53    1.62
   7   4  -8   21.04    1.32
  -6  -4   8   11.59    1.30
  -6  -4   8   15.52    1.49
  -6   4   8   11.55    0.79
  -6   4   8   11.62    0.80
   6   4  -8   12.33    1.09
   6   4  -8   10.70    1.29
  -6   4   8    7.95    1.06
   6   4  -8   12.19    1.19
   6   4  -8    9.72    1.18
   6   4  -8    9.87    1.26
  -6   4   8   11.83    1.14
   6   4  -8    7.44    1.79
  -6   4   8    8.27    1.23
   5  -4  -8    7.42    1.49
  -5  -4   8    8.80    1.26
  -5  -4   8    9.20    1.22
   5   4  -8    7.21    0.99
   5   4  -8    7.94    1.97
  -5   4   8   10.23    0.67
   5   4  -8   10.75    1.08
   5   4  -8   11.38    1.33
  -5   4   8    8.35    1.08
   5   4  -8   10.83    1.25
   5   4  -8    8.76    1.14
  -5   4   8    9.90    1.02
   4  -4  -8    1.77    0.93
  -4  -4   8    3.46    1.00
  -4  -4   8    2.27    0.93
  -4  -4   8    2.82    0.92
  -4   4   8    2.35    0.59
   4   4  -8    1.65    1.25
   4   4  -8    2.90    0.83
  -4   4   8    2.12    0.68
   4   4  -8    3.08    0.74
   4   4  -8    3.12    0.77
   4   4  -8    1.80    0.67
   4   4  -8    2.88    0.84
  -3  -4   8    6.60    1.30
   3  -4  -8    5.81    1.15
  -3  -4   8    8.30    1.15
  -3  -4   8    7.39    1.21
   3   4  -8    7.72    1.27
  -3   4   8    6.20    0.79
   3   4  -8    5.84    0.96
   3   4  -8    7.42    0.99
   3   4  -8    4.01    1.54
   3   4  -8    8.72    1.17
  -3   4   8    5.07    0.82
   3   4  -8    5.84    0.97
  -2  -4   8    0.85    0.76
  -2  -4   8    0.56    0.73
  -2  -4   8   -0.24    0.80
   2  -4  -8   -0.37    0.68
   2   4  -8    1.12    0.75
   2   4  -8    1.06    0.67
   2   4  -8    0.93    0.76
   2   4  -8    1.23    1.14
  -2   4   8    0.59    0.41
  -2   4   8    0.79    0.52
   2   4  -8    0.37    0.68
   2   4  -8    0.87    0.62
  -1  -4   8   32.88    2.24
  -1  -4   8   34.62    2.30
  -1  -4   8   33.39    2.46
   1  -4  -8   31.06    2.27
   1   4  -8   26.82    2.07
   1   4  -8   29.87    1.96
   1   4  -8   33.45    2.04
   1   4  -8   32.90    2.21
  -1   4   8   30.88    1.57
  -1   4   8   27.21    1.70
   1   4  -8   27.55    3.10
   0  -4   8    0.52    0.80
   0  -4   8    0.01    0.67
   0  -4   8    0.91    0.72
   0  -4  -8   -0.66    0.78
   0   4  -8    0.59    0.70
   0   4  -8   -1.30    0.60
   0   4  -8   -0.26    0.88
   0   4  -8    0.31    0.52
   0   4   8    0.51    0.35
   0   4   8    0.08    0.50
   0   4  -8    1.27    0.69
   1  -4   8   22.95    1.82
   1  -4   8   23.61    1.79
   1  -4   8   24.45    2.09
   1   4   8   22.85    1.15
  -1   4  -8   22.45    1.61
   1   4   8   27.60    1.46
  -1   4  -8   23.34    2.63
  -1   4  -8   21.55    1.84
  -1   4  -8   24.24    1.79
   2  -4   8   10.78    1.28
   2  -4   8    7.21    1.25
  -2   4  -8   10.26    1.81
   2   4   8   10.55    0.87
  -2   4  -8    8.97    1.23
   2   4   8   10.17    0.67
  -2   4  -8    8.29    1.04
  -2   4  -8   10.04    1.32
  -2   4  -8   10.56    1.31
   3  -4   8   35.60    2.50
  -3   4  -8   37.66    1.91
   3   4   8   33.83    1.62
   4  -4   8   11.66    1.46
   4  -4   8   11.86    1.33
   4   4   8   13.19    0.88
   5  -4   8   19.07    1.47
   5  -4   8   18.52    1.74
   5   4   8   21.31    1.37
   5   4   8   22.04    1.14
   6  -4   8    7.23    0.87
   6  -4   8    6.77    1.03
   6   4   8    6.15    0.78
   7  -4   8   10.52    0.76
   7   4   8    9.08    0.84
  -7  -5   8    2.77    0.62
  -7  -5   8    1.79    0.57
  -7   5   8    2.86    0.57
   7   5  -8    3.64    0.55
  -7   5   8    2.68    0.61
  -7   5   8    3.46    0.64
   7   5  -8    2.92    0.45
  -6  -5   8    5.32    0.83
  -6  -5   8    6.36    0.90
   6   5  -8    7.22    0.83
  -6   5   8    6.07    0.89
  -6   5   8    7.22    0.80
  -6   5   8    7.95    0.94
   6   5  -8    7.39    0.91
  -5  -5   8    5.25    0.88
  -5  -5   8    3.80    0.96
  -5  -5   8    3.75    0.85
   5   5  -8    6.44    0.79
  -5   5   8    6.19    0.74
   5   5  -8    3.97    1.20
  -5   5   8    4.78    0.75
   5   5  -8    6.31    0.86
   5   5  -8    5.85    0.83
  -4  -5   8    6.36    1.12
  -4  -5   8    8.88    1.22
  -4  -5   8    8.73    1.14
   4   5  -8    9.79    1.04
   4   5  -8    6.24    0.72
   4   5  -8    6.19    0.71
  -4   5   8    6.40    0.83
   4   5  -8    7.17    0.96
   4   5  -8   10.15    1.20
   4   5  -8    4.61    1.33
  -4   5   8    6.68    0.75
  -3  -5   8    2.16    0.68
  -3  -5   8    1.35    0.81
  -3  -5   8    2.24    0.75
   3   5  -8    0.92    0.45
   3   5  -8    0.98    0.65
   3   5  -8    0.25    0.87
   3   5  -8    1.07    0.56
  -3   5   8    1.38    0.44
   3   5  -8    1.01    0.45
  -3   5   8    1.09    0.51
   3   5  -8    1.14    0.57
  -2  -5   8    6.14    1.12
  -2  -5   8    7.23    1.03
  -2  -5   8    5.98    1.04
   2  -5  -8    5.03    1.22
   2   5  -8    7.94    0.84
   2   5  -8    6.63    1.00
   2   5  -8    7.36    0.94
   2   5  -8    5.13    0.74
  -2   5   8    6.75    0.81
   2   5  -8    4.91    0.80
  -2   5   8    6.41    0.64
   2   5  -8    6.37    1.55
  -1  -5   8   16.77    1.40
  -1  -5   8   14.90    1.47
  -1  -5   8   15.34    1.63
   1   5  -8   13.61    1.48
  -1   5   8   12.31    0.77
   1   5  -8   10.96    1.19
  -1   5   8   13.47    1.09
   1   5  -8   14.89    1.21
   1   5  -8   12.71    1.13
   1   5  -8   12.14    1.96
   0  -5   8   22.43    1.77
   0  -5   8   23.55    1.99
   0  -5   8   23.29    1.72
   0   5  -8   22.73    2.51
   0   5  -8   28.00    1.93
   0   5   8   25.18    1.39
   0   5  -8   23.50    1.66
   0   5  -8   25.82    1.59
   0   5  -8   24.97    1.54
   1  -5   8    0.76    0.68
   1  -5   8    0.65    0.60
  -1   5  -8   -0.32    0.46
  -1   5  -8   -0.13    0.62
  -1   5  -8    0.07    0.43
  -1   5  -8    0.95    0.77
  -1   5  -8    0.00    0.50
   1   5   8   -0.04    0.37
   2  -5   8    7.00    0.98
   2  -5   8    6.03    1.13
  -2   5  -8    4.41    1.15
  -2   5  -8    8.47    0.82
  -2   5  -8    5.49    0.84
  -2   5  -8    8.14    1.19
  -2   5  -8    7.80    0.93
   3  -5   8    9.05    1.25
  -3   5  -8   12.04    1.44
  -3   5  -8   10.21    1.10
  -3   5  -8   10.67    1.06
   4  -5   8   21.83    1.50
   4  -5   8   19.96    1.70
  -4   5  -8   22.15    1.50
  -4   5  -8   21.90    1.40
   5  -5   8    2.32    0.56
  -5   5  -8    2.34    0.51
  -5   5  -8    2.90    0.59
  -3  -6   8    6.29    0.81
  -3  -6   8    6.85    0.79
  -3   6   8    4.86    0.59
   3   6  -8    5.68    0.64
  -2  -6   8    7.11    0.82
   2   6  -8    7.09    0.74
  -2   6   8    7.31    0.62
   2   6  -8    7.66    0.68
  -1  -6   8    6.72    0.86
  -1   6   8    5.71    0.54
   1   6  -8    6.09    0.73
   1   6  -8    6.07    0.66
   0  -6   8    8.50    0.91
   0   6  -8    7.99    0.81
   0   6  -8    6.83    0.64
  -1   6  -8    8.97    0.81
  -1   6  -8    7.37    0.80
  12   0  -9    1.27    0.42
 -11   0   9   14.95    0.96
  11   0  -9   15.36    1.43
 -10   0   9   27.25    1.55
  10   0  -9   26.45    1.41
  -9   0   9    1.58    0.62
   9   0  -9    1.13    0.54
  -8   0   9   -0.35    0.61
   8   0  -9    0.37    1.31
   8   0  -9    0.00    0.53
   7   0  -9   37.14    2.22
  -7   0   9   35.61    2.07
   7   0  -9   36.67    3.68
   6   0  -9   46.63    3.96
  -6   0   9   42.17    2.30
  -6   0   9   37.98    2.05
   5   0  -9   15.01    2.30
   4   0  -9   24.72    2.77
   3   0  -9   16.25    1.43
   3   0  -9   14.94    2.21
   2   0  -9   20.11    1.60
   2   0  -9   18.22    2.40
   1   0  -9   64.67    4.59
   1   0  -9   60.47    3.45
   1   0  -9   59.86    3.23
   1   0  -9   60.14    2.78
  -1   0   9   51.61    3.28
   1   0  -9   59.80    3.61
   0   0  -9   50.14    2.43
   0   0  -9   54.67    4.34
   0   0  -9   47.30    3.00
   0   0  -9   50.47    2.83
  -1   0  -9    9.23    0.90
  -1   0  -9   10.18    1.10
   2   0   9    0.61    0.64
  -2   0  -9    1.03    0.48
   2   0   9    0.58    0.61
  -2   0  -9    1.40    0.54
  -3   0  -9   45.67    2.69
   3   0   9   42.43    2.32
  -3   0  -9   42.80    2.27
   3   0   9   44.30    2.24
  -4   0  -9   55.64    3.23
   4   0   9   60.13    3.26
   4   0   9   54.72    2.73
   4   0   9   59.17    2.71
   4   0   9   51.59    2.79
   4   0   9   57.15    2.71
   4   0   9   50.45    2.81
  -4   0  -9   58.07    2.80
   5   0   9   10.55    1.29
   5   0   9   10.29    1.13
  -5   0  -9   10.76    1.11
   5   0   9   10.77    1.11
   5   0   9    9.30    1.06
   5   0   9   10.29    1.40
   5   0   9    9.74    1.16
   6   0   9   17.00    1.33
   6   0   9   15.62    1.24
  -6   0  -9   15.45    1.37
   6   0   9   17.21    1.42
   6   0   9   17.92    1.65
   6   0   9   16.44    1.17
   6   0   9   16.26    1.62
   7   0   9   16.01    1.38
   7   0   9   15.69    1.17
   7   0   9   16.14    1.54
   7   0   9   15.63    1.56
   8   0   9   17.20    1.39
   8   0   9   15.74    1.04
   8   0   9   16.21    1.46
   9   0   9    4.59    0.85
   9   0   9    5.60    0.76
   9   0   9    5.13    0.52
  11  -1  -9    8.66    0.71
 -11  -1   9   11.30    0.92
  11   1  -9    9.82    0.95
  11   1  -9    8.15    1.01
  11   1  -9    7.57    1.05
 -10  -1   9   16.56    1.32
  10  -1  -9   15.14    1.16
  10   1  -9   19.15    1.47
  -9  -1   9   15.09    1.44
   9  -1  -9   17.02    1.42
  -9   1   9   15.88    1.01
   9   1  -9   13.90    1.53
   9   1  -9   15.97    0.95
   8  -1  -9    5.15    0.98
  -8  -1   9    8.66    1.17
   8  -1  -9   12.09    2.33
   8   1  -9    9.95    2.09
   8   1  -9    9.92    0.90
   8   1  -9    4.85    1.21
  -8   1   9    8.75    0.86
   7  -1  -9   19.95    2.83
  -7  -1   9   22.67    1.64
  -7  -1   9   21.37    1.80
   7   1  -9   21.77    1.45
   7   1  -9   23.00    2.93
  -7   1   9   21.64    1.31
  -7   1   9   22.16    1.47
  -6  -1   9   11.20    1.30
   6  -1  -9   10.59    2.15
  -6  -1   9    8.73    1.22
  -6   1   9   10.93    0.94
  -6   1   9    8.81    1.00
   6   1  -9    8.82    1.09
   6   1  -9   10.94    2.12
   5  -1  -9   20.24    2.61
  -5  -1   9   16.74    1.51
  -5   1   9   16.82    1.62
   5   1  -9   16.24    2.42
  -5   1   9   15.33    1.61
   4  -1  -9   38.15    3.54
   4  -1  -9   38.38    2.49
  -4   1   9   36.33    2.28
   4   1  -9   35.76    3.49
   3  -1  -9   52.84    2.99
   3  -1  -9   50.91    4.19
  -3   1   9   45.08    2.99
   3   1  -9   56.12    4.30
   2  -1  -9   34.55    2.14
   2  -1  -9   34.54    3.20
   2  -1  -9   37.94    1.81
  -2  -1   9   24.70    1.89
   2   1  -9   30.05    2.08
  -2   1   9   32.38    1.81
   2   1  -9   35.36    3.23
  -2   1   9   29.96    2.14
   1  -1  -9   49.46    2.68
   1  -1  -9   47.60    2.26
   1  -1  -9   48.01    3.90
   1   1  -9   43.30    2.74
  -1   1   9   44.20    2.26
  -1   1   9   40.60    2.65
   1   1  -9   50.64    3.92
   0  -1  -9   88.42    4.41
   0  -1  -9   84.91    3.82
   0   1   9   82.79    4.38
   0   1  -9   93.33    4.96
   0   1  -9  103.90    6.20
   0   1   9   85.56    3.61
   0   1  -9   83.46    4.66
  -1  -1  -9   39.24    2.36
  -1  -1  -9   42.45    2.04
   1  -1   9   40.75    2.55
   1   1   9   38.87    1.94
   1   1   9   37.56    1.96
  -2  -1  -9    6.60    0.78
   2  -1   9   10.01    1.35
  -2  -1  -9    7.74    0.95
   2   1   9    7.05    0.83
   2   1   9    6.84    0.78
  -3  -1  -9   40.87    2.37
  -3  -1  -9   36.72    2.00
   3  -1   9   40.73    2.55
   3   1   9   38.09    1.94
   3   1   9   37.23    1.93
   3   1   9   35.52    1.87
   4  -1   9   12.37    1.50
   4  -1   9   12.05    1.03
  -4  -1  -9   14.18    1.31
  -4  -1  -9   13.55    1.10
   4  -1   9   13.13    1.60
   4   1   9   10.99    1.40
   4   1   9   13.83    1.14
   4   1   9   11.76    1.02
   4   1   9   13.00    1.04
   5  -1   9   11.32    1.35
   5  -1   9   12.36    1.41
  -5  -1  -9   11.74    1.09
   5  -1   9   11.25    1.48
  -5  -1  -9   13.88    1.38
   5   1   9   12.17    1.37
   5   1   9   13.01    1.11
   5   1   9   12.52    1.00
   5   1   9   13.02    1.09
   6  -1   9   13.15    1.44
  -6  -1  -9   10.44    1.07
   6  -1   9   13.35    1.30
   6  -1   9   11.53    1.27
   6   1   9   12.54    1.04
   6   1   9   11.47    1.28
   6   1   9   11.40    0.91
   6   1   9   10.96    1.48
   6   1   9   12.80    1.11
   7  -1   9   14.29    1.19
   7  -1   9   13.88    1.17
   7  -1   9   13.30    1.44
   7   1   9   14.25    1.25
   7   1   9   14.06    0.84
   7   1   9   15.34    1.19
   8  -1   9    4.72    0.59
   8  -1   9    4.66    0.88
   8  -1   9    4.60    0.75
   8  -1   9    3.30    0.92
   8   1   9    3.69    0.89
   8   1   9    4.54    0.69
   8   1   9    4.95    0.66
   8   1   9    3.98    0.67
   9  -1   9    2.98    0.48
   9  -1   9    3.03    0.68
   9   1   9    2.90    0.53
  -9   1  -9    3.46    0.70
   9   1   9    2.88    0.38
   9   1   9    1.28    0.49
   9   1   9    2.40    0.51
  11  -2  -9    2.79    0.42
 -11  -2   9    2.30    0.55
  11   2  -9    1.00    0.49
  11   2  -9    2.18    0.49
  11   2  -9    2.63    0.60
 -11   2   9    0.40    0.57
 -11   2   9    2.29    0.58
 -10  -2   9    1.71    0.67
  10  -2  -9    0.79    0.48
  10   2  -9    1.28    0.47
  10   2  -9    1.91    0.60
  10   2  -9    1.96    0.62
 -10   2   9    0.91    0.62
 -10   2   9    0.31    0.63
   9  -2  -9   11.59    1.33
  -9  -2   9   10.29    1.12
   9   2  -9   10.72    1.23
   9   2  -9   11.80    1.38
  -9   2   9    9.54    1.15
  -9   2   9   10.16    1.30
   9   2  -9   11.27    1.20
   8  -2  -9    7.34    1.89
  -8  -2   9    8.96    1.09
   8   2  -9    9.04    0.99
   8   2  -9   10.50    1.19
  -8   2   9   10.29    1.29
  -8   2   9    8.76    1.08
  -8   2   9    8.73    0.95
   8   2  -9    8.70    1.15
   8   2  -9    6.01    1.08
  -7  -2   9   11.59    1.36
   7  -2  -9   12.97    2.34
  -7   2   9   12.31    1.35
  -7   2   9   12.29    1.31
   7   2  -9   13.23    0.88
   7   2  -9   14.43    2.42
   7   2  -9   13.83    1.44
   7   2  -9   13.13    1.20
  -7   2   9   13.60    1.42
  -6  -2   9    9.45    1.35
   6   2  -9    9.25    0.93
  -6   2   9   10.83    1.28
  -6   2   9   11.39    1.37
   6   2  -9   10.25    2.11
   6   2  -9   12.71    1.49
   6   2  -9    9.89    1.14
  -6   2   9   11.00    1.27
  -5  -2   9   32.77    2.14
  -5  -2   9   29.83    2.16
   5  -2  -9   35.85    2.56
  -5   2   9   32.70    1.96
   5   2  -9   36.35    3.54
   5   2  -9   33.45    1.79
   5   2  -9   33.44    1.91
  -5   2   9   29.84    2.29
  -5   2   9   35.84    2.12
  -5   2   9   32.03    2.05
   5   2  -9   32.59    2.60
  -5   2   9   30.49    2.04
  -4  -2   9   32.93    2.19
  -4  -2   9   33.18    2.18
   4  -2  -9   35.89    2.50
  -4   2   9   35.24    1.96
   4   2  -9   36.36    3.47
   4   2  -9   33.03    2.00
  -4   2   9   34.89    2.12
  -4   2   9   36.05    2.05
  -4   2   9   35.25    2.06
  -3  -2   9   10.87    1.35
   3  -2  -9   11.11    1.31
  -3  -2   9    9.65    1.31
  -3   2   9    9.97    1.08
  -3   2   9   10.79    1.20
  -3   2   9    9.67    1.07
   3   2  -9   13.68    2.16
  -3   2   9    9.57    1.04
   2  -2  -9   27.31    1.56
   2  -2  -9   28.24    1.99
  -2  -2   9   27.35    1.93
  -2   2   9   26.04    1.65
  -2   2   9   24.61    1.54
  -2   2   9   24.23    1.58
   2   2  -9   29.55    3.00
  -1  -2   9   23.00    1.94
   1  -2  -9   20.00    1.30
   1  -2  -9   20.38    1.66
  -1   2   9   23.75    1.41
   1   2  -9   29.06    2.84
  -1   2   9   24.87    1.51
   0  -2  -9   28.82    1.60
   0  -2   9   30.41    2.21
   0  -2  -9   30.63    1.96
   0   2   9   26.20    1.56
   0   2   9   28.98    1.65
   0   2  -9   33.98    3.09
   1  -2   9   50.23    2.97
  -1  -2  -9   49.29    2.33
  -1  -2  -9   46.58    2.69
   1   2   9   46.66    2.23
   1   2   9   47.42    2.02
   1   2   9   48.53    2.18
   2  -2   9   41.35    2.71
  -2  -2  -9   40.72    2.06
  -2  -2  -9   41.06    2.40
   2   2   9   40.60    1.74
   2   2   9   39.54    1.91
   2   2   9   38.83    1.92
   3  -2   9   45.11    2.86
   3  -2   9   43.16    2.34
  -3  -2  -9   44.67    2.58
  -3  -2  -9   46.03    2.28
   3   2   9   44.36    2.36
   3   2   9   45.94    2.13
   3   2   9   46.54    2.10
   4  -2   9    0.35    0.52
  -4  -2  -9    0.95    0.50
   4  -2   9    0.07    0.69
  -4  -2  -9    1.19    0.55
   4   2   9    0.54    0.55
  -4   2  -9    0.84    0.77
   4   2   9    0.30    0.43
   4   2   9    1.16    0.43
   5  -2   9   25.76    2.10
  -5  -2  -9   25.94    1.62
   5  -2   9   27.84    1.57
   5  -2   9   26.68    2.18
  -5   2  -9   26.15    1.93
   5   2   9   26.75    1.50
   5   2   9   26.88    1.53
   5   2   9   29.63    1.64
   6  -2   9   27.00    2.00
   6  -2   9   26.82    2.08
  -6   2  -9   30.48    1.92
   6   2   9   28.67    1.50
   6   2   9   25.21    1.49
   6   2   9   29.87    1.55
   7  -2   9    5.27    0.87
   7  -2   9    4.57    0.94
  -7   2  -9    4.98    0.77
   7   2   9    3.31    0.64
   7   2   9    5.35    0.66
   8  -2   9    9.08    1.11
   8  -2   9    9.50    1.13
   8  -2   9   10.72    0.96
   8   2   9    9.38    0.80
  -8   2  -9   10.19    0.97
   8   2   9   10.39    0.85
   9  -2   9   16.80    0.93
   9  -2   9   16.43    1.06
   9   2   9   16.88    0.93
  -9   2  -9   17.73    1.05
   9   2   9   16.58    1.00
 -10  -3   9    8.34    0.80
  10  -3  -9    9.15    0.92
  10   3  -9    9.88    1.01
 -10   3   9    8.37    0.80
 -10   3   9    9.64    0.80
  10   3  -9    8.09    0.70
  10   3  -9    8.69    0.75
  -9  -3   9   10.33    1.09
  -9  -3   9   10.28    1.00
  -9   3   9   10.16    0.94
   9   3  -9   10.35    0.93
  -9   3   9   10.95    0.84
  -9   3   9    9.10    0.97
   9   3  -9   11.63    0.99
   9   3  -9    8.68    0.86
   9   3  -9   11.97    1.29
  -8  -3   9   11.18    1.21
  -8  -3   9    9.77    1.19
   8  -3  -9   12.33    2.12
   8   3  -9   12.46    1.13
   8   3  -9   11.28    1.14
  -8   3   9   11.04    1.11
   8   3  -9   10.25    0.96
  -8   3   9   11.41    1.07
  -8   3   9   11.06    1.04
   8   3  -9   11.27    1.42
   8   3  -9   10.76    0.99
  -7  -3   9    8.24    1.08
  -7  -3   9   10.84    1.22
   7   3  -9    6.04    1.77
  -7   3   9    8.31    0.96
  -7   3   9    7.81    1.01
   7   3  -9    9.13    1.31
   7   3  -9   10.18    1.07
  -7   3   9    8.30    1.00
   7   3  -9    8.59    1.03
   7   3  -9    9.29    1.20
   7   3  -9    7.28    0.95
  -6  -3   9    9.82    1.34
  -6  -3   9    9.90    1.36
  -6   3   9   13.32    1.13
   6   3  -9   11.22    2.22
   6   3  -9   11.28    1.14
   6   3  -9   11.65    1.25
  -6   3   9   14.47    1.52
   6   3  -9   11.05    1.36
  -6   3   9   11.27    1.04
  -6   3   9    9.84    1.21
  -6   3   9   11.38    1.38
   6   3  -9   13.04    1.25
  -5  -3   9    7.53    1.08
  -5  -3   9    7.44    1.11
   5   3  -9    5.59    0.97
  -5   3   9    7.88    0.90
   5   3  -9    6.68    1.76
  -5   3   9    7.16    0.86
  -5   3   9    5.09    1.09
  -5   3   9    6.10    0.86
  -5   3   9    5.83    0.93
   5   3  -9    7.73    1.09
   5   3  -9    7.61    0.93
   5   3  -9    8.10    1.11
  -4  -3   9   16.49    1.52
  -4  -3   9   15.66    1.80
  -4  -3   9   17.21    1.63
   4  -3  -9   12.54    1.70
   4   3  -9   16.24    1.59
  -4   3   9   16.29    1.44
  -4   3   9   16.71    1.31
   4   3  -9   18.11    1.40
  -4   3   9   15.99    1.14
   4   3  -9   14.70    1.63
   4   3  -9   17.23    2.49
  -4   3   9   16.40    1.08
   4   3  -9   14.66    1.52
   3  -3  -9    7.21    1.33
  -3  -3   9    8.16    1.37
  -3  -3   9    7.55    1.09
  -3  -3   9    7.62    1.12
  -3   3   9    7.34    0.75
   3   3  -9    8.61    1.90
   3   3  -9    8.69    1.09
   3   3  -9   10.37    1.36
  -3   3   9    7.76    0.74
  -3   3   9    6.00    0.84
   3   3  -9    7.31    0.86
  -3   3   9    7.25    0.97
  -2  -3   9   35.68    2.32
  -2  -3   9   38.64    2.66
   2  -3  -9   37.76    2.54
  -2  -3   9   38.79    2.31
  -2   3   9   36.30    1.56
   2   3  -9   37.45    2.55
   2   3  -9   42.37    3.71
  -2   3   9   33.45    2.03
  -2   3   9   36.11    1.91
   2   3  -9   35.61    1.91
   2   3  -9   39.19    2.14
  -1  -3   9   30.71    2.17
   1  -3  -9   28.83    1.67
   1  -3  -9   31.71    2.18
  -1  -3   9   30.67    2.15
  -1  -3   9   31.24    2.39
   1   3  -9   30.04    1.76
  -1   3   9   32.37    1.67
   1   3  -9   36.64    3.37
   1   3  -9   29.73    2.32
   1   3  -9   34.83    1.92
  -1   3   9   32.03    1.82
   0  -3  -9    8.90    1.14
   0  -3   9   10.82    1.44
   0  -3  -9    8.41    0.80
   0  -3   9    8.61    1.11
   0  -3   9    8.31    1.11
   0   3   9    7.85    0.95
   0   3  -9   11.02    1.97
   0   3  -9    8.46    1.00
   0   3   9    9.47    0.85
   0   3  -9    9.01    1.09
  -1  -3  -9   10.37    1.14
   1  -3   9   10.33    1.49
  -1  -3  -9    8.69    0.88
  -1   3  -9   11.82    2.02
   1   3   9   11.46    0.86
  -1   3  -9   11.47    1.14
  -1   3  -9   10.38    1.12
   1   3   9   10.56    0.98
  -2  -3  -9   14.57    1.32
   2  -3   9   12.14    1.42
   2  -3   9   13.44    1.68
  -2  -3  -9   13.02    1.09
  -2   3  -9   18.24    1.37
   2   3   9   17.00    1.07
   2   3   9   18.64    1.04
  -3  -3  -9   34.64    1.85
   3  -3   9   31.74    2.39
   3  -3   9   31.02    2.04
   3   3   9   31.87    1.64
   3   3   9   35.75    1.64
  -3   3  -9   35.98    1.97
  -4  -3  -9    4.82    0.82
   4  -3   9    3.69    1.05
   4  -3   9    5.76    0.84
  -4   3  -9    5.93    0.79
   4   3   9    6.27    0.65
   4   3   9    5.86    0.72
   5  -3   9    8.81    1.27
   5  -3   9    9.76    1.01
   5   3   9    8.95    0.82
  -5   3  -9    9.30    0.99
   5   3   9    8.53    0.76
   6  -3   9   13.74    1.42
   6  -3   9   13.30    0.96
   6   3   9   13.10    1.04
   6   3   9   12.47    0.90
   6   3   9   13.21    0.85
  -6   3  -9   13.16    1.04
   7  -3   9    2.39    0.72
   7  -3   9    3.98    0.80
   7   3   9    2.92    0.55
   7   3   9    3.41    0.43
  -7   3  -9    3.27    0.50
   8  -3   9   12.29    1.03
   8   3   9   14.94    0.90
  -8   3  -9   14.27    0.73
  -9  -4   9    7.20    0.77
   9   4  -9    8.53    0.85
  -8  -4   9    3.64    0.65
   8  -4  -9    3.87    1.30
  -8  -4   9    3.64    0.68
   8   4  -9    3.40    0.43
   8   4  -9    4.48    0.66
   8   4  -9    5.69    0.65
  -8   4   9    3.71    0.57
   8   4  -9    2.78    0.43
  -7  -4   9    8.51    1.04
  -7  -4   9    8.45    1.08
   7   4  -9    8.51    0.88
   7   4  -9    9.16    1.08
   7   4  -9    9.83    0.93
  -7   4   9    7.65    1.00
  -7   4   9    6.02    0.93
  -7   4   9    6.47    0.97
   7   4  -9    7.70    0.80
  -6  -4   9    8.37    1.11
  -6  -4   9    9.49    1.19
  -6  -4   9    4.15    1.08
   6   4  -9    7.62    0.88
  -6   4   9   10.18    1.24
   6   4  -9    9.43    1.18
   6   4  -9    8.74    1.03
  -6   4   9    7.89    0.98
   6   4  -9    8.83    0.96
   6   4  -9    6.70    1.64
  -6   4   9    7.71    0.99
  -5  -4   9   11.42    1.31
  -5  -4   9   10.92    1.49
  -5  -4   9    9.90    1.29
   5   4  -9   11.11    1.20
   5   4  -9    7.94    1.72
   5   4  -9   11.28    1.08
   5   4  -9   10.80    1.05
   5   4  -9    9.94    1.34
   5   4  -9   10.64    1.07
  -5   4   9   11.76    1.07
  -5   4   9    8.01    1.03
  -4  -4   9    3.63    1.05
  -4  -4   9    4.31    0.90
  -4  -4   9    3.47    0.89
  -4   4   9    2.70    0.66
   4   4  -9    2.12    0.84
   4   4  -9    2.35    0.67
   4   4  -9    2.62    1.29
   4   4  -9    3.22    0.74
  -4   4   9    3.32    0.67
   4   4  -9    3.52    0.76
   4   4  -9    3.61    0.77
  -3  -4   9    8.90    1.47
  -3  -4   9   10.49    1.29
  -3  -4   9    9.93    1.24
   3   4  -9   12.60    1.19
   3   4  -9   11.21    2.07
   3   4  -9   11.27    1.28
   3   4  -9   11.15    1.41
   3   4  -9   12.28    1.39
  -3   4   9    9.35    1.10
   3   4  -9   11.70    1.17
  -3   4   9    9.99    0.95
  -2  -4   9    1.63    0.79
  -2  -4   9    1.14    0.74
  -2  -4   9    0.02    0.75
   2   4  -9    1.87    0.76
   2   4  -9    1.24    0.63
   2   4  -9    2.07    0.79
  -2   4   9    2.31    0.53
  -2   4   9    0.94    0.56
   2   4  -9    1.94    0.67
   2   4  -9    1.76    1.08
  -1  -4   9    6.06    0.98
  -1  -4   9    5.84    1.21
  -1  -4   9    7.03    1.04
  -1   4   9    8.18    0.73
   1   4  -9    7.12    0.93
   1   4  -9    8.94    1.19
  -1   4   9    9.72    0.99
   1   4  -9   11.23    1.35
   1   4  -9    8.30    1.09
   1   4  -9    7.61    1.68
   0  -4   9    4.37    0.86
   0  -4  -9    4.76    0.77
   0  -4   9    3.74    0.87
   0  -4   9    4.85    1.09
   0   4   9    5.45    0.62
   0   4  -9    4.86    0.99
   0   4   9    6.42    0.76
   0   4  -9    5.66    0.86
   0   4  -9    3.85    0.76
   0   4  -9    4.60    1.38
   0   4  -9    6.33    1.04
   1  -4   9   12.29    1.30
   1  -4   9    8.39    1.35
  -1   4  -9   11.13    1.38
   1   4   9   10.71    0.92
  -1   4  -9   10.47    1.05
  -1   4  -9   11.61    1.49
   1   4   9   11.65    0.76
  -1   4  -9    9.33    1.81
  -1   4  -9   11.72    1.36
   2  -4   9    6.07    1.17
   2  -4   9    6.99    1.02
   2   4   9    4.56    0.58
  -2   4  -9    4.91    0.93
  -2   4  -9    6.69    1.25
   3  -4   9   18.45    1.66
   3  -4   9   16.61    1.44
   3   4   9   15.63    0.97
   4  -4   9   17.83    1.35
   4  -4   9   16.59    1.63
   4   4   9   16.10    1.18
   4   4   9   17.08    0.98
   5  -4   9    7.14    1.13
   5  -4   9    8.72    0.94
   5   4   9    9.27    0.66
   5   4   9    7.37    0.84
   6  -4   9    2.77    0.43
   6   4   9    3.23    0.56
  -6  -5   9    6.43    0.91
  -6  -5   9    6.41    0.82
   6   5  -9    5.05    0.63
  -6   5   9    4.32    0.60
  -6   5   9    4.80    0.68
   6   5  -9    5.10    0.62
  -6   5   9    4.71    0.65
  -5  -5   9    2.30    0.60
  -5  -5   9    2.81    0.65
   5   5  -9    1.05    0.78
  -5   5   9    2.01    0.44
  -5   5   9    2.13    0.69
   5   5  -9    2.24    0.54
   5   5  -9    1.57    0.50
  -5   5   9    1.34    0.50
  -4  -5   9   16.39    1.56
  -4  -5   9   17.18    1.41
  -4  -5   9   15.07    1.38
   4   5  -9   17.54    1.38
   4   5  -9   16.30    0.97
   4   5  -9   16.95    1.15
  -4   5   9   15.40    0.99
   4   5  -9   17.28    1.03
   4   5  -9   14.60    1.96
  -4   5   9   17.27    1.20
  -3  -5   9    5.07    1.04
  -3  -5   9    5.39    0.83
  -3  -5   9    5.15    0.80
   3   5  -9    5.84    0.70
   3   5  -9    4.68    1.24
   3   5  -9    5.75    0.87
  -3   5   9    4.65    0.68
   3   5  -9    6.48    0.80
  -3   5   9    5.65    0.59
   3   5  -9    6.24    0.76
  -2  -5   9    2.04    0.82
  -2  -5   9    1.80    0.62
  -2  -5   9    2.99    0.67
   2   5  -9    1.05    0.46
   2   5  -9    1.16    0.85
   2   5  -9    2.04    0.70
   2   5  -9    1.74    0.50
  -2   5   9    2.57    0.39
   2   5  -9    1.74    0.49
  -2   5   9    1.85    0.50
  -1  -5   9    4.21    0.73
  -1  -5   9    3.36    0.69
  -1  -5   9    3.60    0.92
   1   5  -9    3.02    0.77
  -1   5   9    2.80    0.51
   1   5  -9    3.17    0.61
   1   5  -9    2.74    0.62
   1   5  -9    1.69    0.88
   1   5  -9    2.91    0.58
   0  -5   9   13.56    1.41
   0  -5   9   14.63    1.40
   0   5   9   12.67    0.88
   0   5  -9   12.08    1.38
   0   5  -9   12.15    0.98
   0   5  -9    9.75    1.56
   0   5  -9   13.57    1.10
   0   5  -9   13.12    1.18
   1  -5   9    5.11    1.02
  -1   5  -9    4.11    0.83
   1   5   9    5.07    0.54
  -1   5  -9    4.58    0.69
  -1   5  -9    2.64    0.95
  -1   5  -9    6.43    0.87
  -1   5  -9    6.85    0.68
   2  -5   9    3.34    0.76
   2  -5   9    3.41    0.84
  -2   5  -9    3.69    0.64
  -2   5  -9    4.65    0.75
  -2   5  -9    5.48    0.97
   3  -5   9    4.03    0.67
  -3   5  -9    5.77    0.77
  -3   5  -9    4.32    0.65
  -3   5  -9    4.55    0.88
   4  -5   9   10.54    0.90
  -4   5  -9    7.98    0.86
  -4   5  -9    9.54    0.93
  11   0 -10    3.36    0.67
  10   0 -10   49.42    2.16
 -10   0  10   55.41    2.21
  -9   0  10    0.43    0.45
   9   0 -10    0.38    0.42
   8   0 -10   17.12    1.28
   8   0 -10   13.11    2.34
  -8   0  10   16.70    1.20
   7   0 -10    2.36    0.76
  -7   0  10    2.20    0.62
   7   0 -10    3.45    1.48
  -6   0  10   11.38    1.11
   6   0 -10   12.29    2.26
  -6   0  10   11.24    1.06
  -5   0  10   31.74    1.72
   5   0 -10   30.90    3.27
  -5   0  10   31.89    1.76
  -4   0  10    8.73    1.06
   4   0 -10   11.48    2.06
   3   0 -10    3.71    1.38
   2   0 -10   26.01    2.89
   1   0 -10    1.90    0.61
   1   0 -10    1.38    1.20
   0   0 -10   60.48    3.65
   0   0 -10   65.01    3.00
  -1   0 -10   21.44    1.68
  -1   0 -10   19.92    1.37
   1   0  10   20.66    1.46
   1   0  10   19.43    1.49
   2   0  10    4.35    0.79
  -2   0 -10    3.14    0.84
   2   0  10    3.56    0.80
  -2   0 -10    4.03    0.74
   2   0  10    2.92    0.83
   2   0  10    2.91    0.80
   3   0  10    0.18    0.82
   3   0  10    0.63    0.61
   3   0  10   -0.29    0.56
  -3   0 -10   -0.02    0.52
   3   0  10   -0.11    0.65
   3   0  10   -0.44    0.50
   3   0  10    1.42    0.67
   4   0  10   68.15    3.23
   4   0  10   69.84    3.62
   4   0  10   68.07    3.18
   4   0  10   66.65    3.13
   4   0  10   68.89    3.05
  -4   0 -10   61.45    3.19
   4   0  10   69.78    3.12
   5   0  10    5.80    0.82
   5   0  10    5.56    0.72
   5   0  10    6.26    0.95
   5   0  10    5.77    1.08
   5   0  10    5.74    0.76
   5   0  10    4.30    0.99
   6   0  10   -0.76    0.38
   6   0  10   -0.41    0.59
   6   0  10    0.58    0.68
   6   0  10    0.33    0.72
   7   0  10   -0.82    0.34
   7   0  10   -1.29    0.51
   7   0  10    0.26    0.67
   8   0  10   12.00    1.05
   8   0  10   10.37    1.18
   8   0  10   11.59    0.72
   9   0  10    5.26    0.59
 -11  -1  10    6.99    0.61
  11  -1 -10    6.13    0.49
  11   1 -10    8.66    0.95
  11   1 -10    6.90    0.83
  11   1 -10    7.87    1.03
 -10  -1  10    9.40    0.90
  10  -1 -10   10.08    0.88
  10   1 -10   12.22    1.16
  -9  -1  10    8.94    1.00
   9  -1 -10    8.39    1.00
   9   1 -10   10.39    0.66
   8  -1 -10    5.51    1.75
   8  -1 -10    6.10    0.99
  -8  -1  10    4.95    0.81
   8   1 -10    5.93    0.69
   8   1 -10    6.20    1.73
   8   1 -10    7.10    1.23
  -7  -1  10   23.58    1.64
   7  -1 -10   22.72    2.88
   7   1 -10   22.77    1.42
   7   1 -10   19.48    2.78
  -7   1  10   23.47    1.46
  -6  -1  10    1.54    0.71
   6  -1 -10    0.87    1.32
  -6   1  10    1.88    0.81
  -6   1  10    2.79    0.65
   6   1 -10    2.38    0.61
   6   1 -10    1.91    1.33
  -5  -1  10   11.86    1.26
   5  -1 -10   14.65    2.29
  -5   1  10   10.79    1.18
   5   1 -10   11.74    2.07
  -5   1  10   11.89    1.41
   5   1 -10   10.59    1.17
  -5   1  10   12.00    1.42
   4  -1 -10   18.14    2.44
  -4  -1  10   14.06    1.32
  -4   1  10   15.07    1.40
  -4   1  10   18.18    1.53
   4   1 -10   18.32    2.41
  -4   1  10   15.78    1.54
   3  -1 -10   14.19    1.53
   3  -1 -10   15.07    2.33
   3   1 -10   17.33    2.27
  -3   1  10   14.01    1.41
  -3   1  10   14.73    1.35
  -3   1  10   14.66    1.32
  -3   1  10   13.87    1.40
   2  -1 -10   16.37    2.30
   2  -1 -10   12.02    1.41
   2  -1 -10   14.59    1.12
  -2   1  10   14.29    1.32
  -2   1  10   14.17    1.33
  -2   1  10   15.45    1.24
   2   1 -10   16.59    2.21
  -2   1  10   17.09    1.34
   1  -1 -10   58.14    3.26
   1  -1 -10   55.25    2.74
   1  -1 -10   54.82    4.58
  -1   1  10   57.56    2.67
  -1   1  10   55.79    2.60
  -1   1  10   59.79    2.75
   1   1 -10   66.02    4.69
   0  -1 -10    1.81    0.67
   0  -1 -10    2.70    0.56
   0   1  10    1.78    0.55
   0   1  10    2.71    0.64
   0   1 -10    3.35    1.34
   0   1  10    2.69    0.61
  -1  -1 -10   34.45    1.87
   1  -1  10   32.18    1.86
  -1  -1 -10   35.52    2.22
   1   1  10   32.78    1.80
   1   1  10   33.33    1.83
   1   1  10   36.27    1.83
   1   1  10   31.37    1.70
   2  -1  10    1.11    0.83
  -2  -1 -10    1.20    0.54
   2  -1  10    1.02    0.48
   2  -1  10    1.03    0.62
  -2  -1 -10    1.13    0.49
   2  -1  10    0.55    0.83
   2   1  10    1.18    0.48
   2   1  10   -0.15    0.42
   2   1  10    1.89    0.70
   2   1  10    0.51    0.51
   2   1  10   -0.30    0.47
   3  -1  10   15.79    1.47
  -3  -1 -10   12.73    1.12
   3  -1  10   13.90    0.96
  -3  -1 -10   13.83    1.31
   3  -1  10   13.01    1.55
   3   1  10   14.88    1.18
   3   1  10   13.47    1.08
   3   1  10   13.49    1.40
   3   1  10   14.31    1.20
   4  -1  10   10.34    1.30
   4  -1  10    9.44    1.35
  -4  -1 -10   10.00    1.02
   4  -1  10   10.12    1.20
   4   1  10    8.45    1.02
   4   1  10   11.01    1.02
   4   1  10   11.31    1.30
   4   1  10   11.30    0.92
   5  -1  10   12.26    1.31
   5  -1  10    7.58    1.20
  -5  -1 -10   10.47    1.03
   5  -1  10   10.44    1.13
   5   1  10    9.44    1.17
   5   1  10    8.83    0.97
   5   1  10    9.34    1.00
   5   1  10   10.00    0.82
   6  -1  10    4.87    0.76
   6  -1  10    4.94    0.96
   6  -1  10    6.89    0.89
   6   1  10    5.98    0.81
   6   1  10    5.31    0.58
   6   1  10    6.18    0.84
   6   1  10    4.63    0.73
   7  -1  10   22.14    1.73
   7  -1  10   24.43    1.35
   7  -1  10   22.90    1.46
   7  -1  10   23.25    1.88
   7   1  10   23.25    1.41
   7   1  10   23.72    1.42
   7   1  10   24.24    1.31
   8  -1  10    6.78    0.72
   8  -1  10    8.12    0.98
   8  -1  10    5.59    0.93
   8   1  10    6.03    0.68
   8   1  10    7.10    0.79
   8   1  10    6.84    0.63
   9  -1  10   16.54    1.13
   9  -1  10   15.51    0.81
  -9   1 -10   15.32    1.04
  10  -2 -10    7.53    0.79
 -10  -2  10    5.88    0.73
 -10   2  10    6.82    0.87
  10   2 -10    7.28    0.91
  10   2 -10    5.00    0.76
 -10   2  10    4.72    0.72
  10   2 -10    7.15    0.72
   9  -2 -10    0.29    0.55
   9  -2 -10    0.16    1.16
  -9  -2  10    0.48    0.57
   9   2 -10   -1.76    0.59
  -9   2  10    0.05    0.55
   9   2 -10    0.76    0.55
   9   2 -10    0.07    0.49
  -9   2  10    0.39    0.54
   8  -2 -10   26.64    2.94
  -8  -2  10   22.70    1.69
   8   2 -10   27.23    1.94
  -8   2  10   25.91    1.68
   8   2 -10   26.74    1.86
  -8   2  10   24.99    1.47
   8   2 -10   22.54    2.70
  -8   2  10   25.44    1.80
  -7  -2  10    4.14    0.91
   7  -2 -10    5.41    1.69
  -7  -2  10    4.97    0.76
  -7   2  10    3.62    0.81
   7   2 -10    4.17    0.95
   7   2 -10    4.67    1.55
  -7   2  10    3.46    0.75
  -7   2  10    4.11    0.69
  -6  -2  10   10.41    1.36
   6  -2 -10   13.15    2.32
  -6  -2  10   11.20    1.27
  -6   2  10   12.14    1.22
   6   2 -10   10.91    2.15
   6   2 -10   13.55    0.97
  -6   2  10   14.08    1.30
   6   2 -10   10.30    1.42
  -6   2  10   12.15    1.30
   5  -2 -10    9.85    2.19
  -5  -2  10   11.81    1.44
  -5  -2  10   10.33    1.22
   5   2 -10    8.17    0.91
   5   2 -10    7.70    1.78
  -5   2  10    8.60    1.09
  -5   2  10    8.42    0.99
  -5   2  10    7.35    1.10
  -5   2  10    8.81    1.12
   4  -2 -10   35.64    3.60
  -4  -2  10   39.95    2.20
   4  -2 -10   39.53    2.59
  -4  -2  10   35.20    2.27
  -4   2  10   36.16    2.08
  -4   2  10   37.43    2.14
  -4   2  10   36.05    1.93
   4   2 -10   35.52    1.93
  -4   2  10   36.24    2.33
   4   2 -10   37.78    3.53
  -4   2  10   34.43    1.91
  -3  -2  10    3.70    0.88
  -3  -2  10    6.66    0.93
   3  -2 -10    6.00    1.04
   3   2 -10    5.12    0.82
   3   2 -10    4.91    1.52
  -3   2  10    4.61    0.80
  -3   2  10    4.88    0.60
  -3   2  10    5.07    0.80
  -3   2  10    3.89    0.70
  -3   2  10    5.27    0.76
   2  -2 -10   17.74    1.62
  -2  -2  10   17.04    1.48
  -2  -2  10   15.99    1.48
   2  -2 -10   17.29    2.51
   2   2 -10   16.83    1.36
  -2   2  10   17.00    1.19
  -2   2  10   17.73    1.36
  -2   2  10   20.75    1.35
   2   2 -10   23.42    2.57
   1  -2 -10   36.16    1.96
  -1  -2  10   34.24    2.12
   1  -2 -10   38.96    2.42
   1  -2 -10   39.36    3.69
   1   2 -10   37.14    2.11
   1   2 -10   42.26    3.59
  -1   2  10   39.44    2.01
  -1   2  10   34.17    1.74
  -1   2  10   38.62    1.98
   0  -2  10    7.67    0.97
   0  -2  10    7.71    1.28
   0  -2 -10    7.31    1.09
   0  -2 -10    8.11    0.79
   0   2  10    5.92    0.77
   0   2  10    6.35    0.80
   0   2 -10    6.80    0.97
   0   2 -10    5.24    1.46
   0   2  10    6.26    0.67
  -1  -2 -10    0.57    0.53
   1  -2  10    1.43    0.60
   1  -2  10    0.38    0.81
  -1  -2 -10    0.25    0.40
   1   2  10    0.69    0.45
   1   2  10   -0.43    0.48
   1   2  10    0.30    0.39
   1   2  10    0.81    0.46
  -1   2 -10    1.15    0.63
  -2  -2 -10   26.87    1.64
  -2  -2 -10   26.48    1.91
   2  -2  10   26.91    1.70
   2  -2  10   27.47    2.18
   2   2  10   28.24    1.69
   2   2  10   29.91    1.56
  -2   2 -10   28.23    1.89
   2   2  10   30.82    1.59
   3  -2  10    9.14    1.42
  -3  -2 -10    7.46    0.85
   3  -2  10    7.66    0.87
   3   2  10    6.68    0.82
  -3   2 -10    7.22    1.05
   3   2  10    8.15    0.95
   3   2  10    5.95    0.76
  -4  -2 -10   12.03    1.12
   4  -2  10   10.99    1.46
   4  -2  10   14.52    1.57
   4  -2  10   14.17    1.05
  -4   2 -10   14.06    1.40
   4   2  10   15.14    1.08
   4   2  10   14.39    1.10
   4   2  10   13.73    1.04
   5  -2  10    0.66    0.69
   5  -2  10    0.35    0.61
  -5   2 -10    0.40    0.59
   5   2  10    0.38    0.38
   5   2  10    0.33    0.41
   5   2  10   -0.15    0.40
   6  -2  10   21.75    1.64
   6  -2  10   19.49    1.72
  -6   2 -10   22.02    1.55
   6   2  10   23.85    1.29
   6   2  10   22.20    1.29
   7  -2  10    8.08    0.93
   7  -2  10    6.97    0.87
   7  -2  10    7.40    1.04
   7   2  10    7.15    0.73
  -7   2 -10    6.16    0.81
   7   2  10    7.97    0.73
   8  -2  10    2.23    0.39
   8  -2  10    2.79    0.54
   8   2  10    4.69    0.53
   8   2  10    3.38    0.50
  -8   2 -10    3.64    0.53
  -9  -3  10   15.73    1.21
  -9   3  10   17.17    0.99
   9   3 -10   17.99    1.16
   9   3 -10   15.61    1.39
   9   3 -10   17.00    1.08
  -9   3  10   16.30    1.05
  -8  -3  10    9.04    0.95
   8  -3 -10    7.60    1.68
   8   3 -10    9.66    1.01
  -8   3  10    7.68    0.84
   8   3 -10    8.23    1.13
   8   3 -10    8.76    0.81
  -8   3  10   10.02    0.84
  -8   3  10    7.76    0.79
   8   3 -10    8.73    0.96
  -7  -3  10   11.50    1.10
   7  -3 -10   11.43    2.06
   7   3 -10   10.71    1.95
   7   3 -10   10.56    0.96
   7   3 -10   10.91    1.19
  -7   3  10   11.12    1.12
  -7   3  10   11.32    0.99
  -7   3  10   10.47    0.91
   7   3 -10   11.43    1.08
   7   3 -10   11.84    1.21
  -6  -3  10    1.05    0.60
  -6  -3  10    1.47    0.65
   6  -3 -10    0.61    1.13
  -6   3  10    0.82    0.43
  -6   3  10    1.07    0.43
   6   3 -10    0.75    1.05
   6   3 -10    1.08    0.65
   6   3 -10    1.65    0.61
   6   3 -10    0.46    0.52
  -6   3  10    0.98    0.63
   6   3 -10    0.30    0.62
  -6   3  10    1.44    0.64
  -6   3  10    0.77    0.62
  -5  -3  10   51.57    2.82
  -5  -3  10   49.88    2.79
  -5   3  10   53.86    2.87
  -5   3  10   50.94    2.26
  -5   3  10   51.06    2.60
  -5   3  10   57.37    2.69
   5   3 -10   52.08    2.87
   5   3 -10   52.68    2.95
   5   3 -10   53.60    4.42
  -5   3  10   53.29    2.44
   5   3 -10   53.91    2.55
  -4  -3  10   10.04    1.16
  -4  -3  10    9.17    1.18
  -4   3  10    9.06    1.02
  -4   3  10    8.95    1.06
  -4   3  10    9.23    0.79
   4   3 -10   10.54    1.09
   4   3 -10   10.96    2.14
   4   3 -10    7.73    1.15
  -3  -3  10    9.89    1.49
  -3  -3  10   10.22    1.33
  -3  -3  10   10.52    1.26
  -3   3  10    7.78    0.98
   3   3 -10    7.54    1.78
   3   3 -10    9.48    0.83
   3   3 -10    9.93    1.06
  -3   3  10    8.48    0.70
  -3   3  10    8.46    0.97
   3   3 -10    9.32    1.30
  -2  -3  10    1.35    0.94
  -2  -3  10    2.48    0.74
  -2  -3  10    2.59    0.74
   2   3 -10    0.94    0.81
  -2   3  10    2.72    0.59
   2   3 -10    1.86    1.12
   2   3 -10    2.43    0.66
  -2   3  10    1.61    0.52
   2   3 -10    1.98    0.55
  -1  -3  10   24.13    1.70
   1  -3 -10   21.99    1.43
  -1  -3  10   26.37    2.11
   1   3 -10   22.45    1.41
   1   3 -10   21.99    1.97
  -1   3  10   22.35    1.36
   1   3 -10   21.99    2.66
  -1   3  10   22.15    1.44
   0  -3 -10    1.68    0.51
   0  -3  10    1.88    0.86
   0  -3  10    1.82    0.76
   0   3  10    1.78    0.45
   0   3  10    1.85    0.52
   0   3  10    1.22    0.48
   0   3 -10    1.61    1.20
   0   3 -10    1.89    0.57
   1  -3  10   21.34    1.57
  -1  -3 -10   20.10    1.37
   1  -3  10   22.15    2.03
  -1   3 -10   25.28    1.51
  -1   3 -10   23.10    2.58
   1   3  10   23.20    1.28
   1   3  10   22.54    1.32
  -2  -3 -10   18.42    1.29
   2  -3  10   18.79    1.46
   2  -3  10   19.45    1.79
  -2   3 -10   18.67    1.34
   2   3  10   17.26    1.07
   2   3  10   18.40    1.18
   3  -3  10   16.50    1.70
   3  -3  10   16.57    1.32
   3   3  10   18.58    1.11
  -3   3 -10   17.02    1.28
   3   3  10   17.38    1.13
   4  -3  10    2.98    0.89
   4  -3  10    3.13    0.61
   4   3  10    2.80    0.48
  -4   3 -10    2.92    0.59
   4   3  10    2.99    0.48
   5  -3  10   22.73    1.83
   5  -3  10   24.26    1.35
   5  -3  10   26.13    2.04
   5   3  10   25.57    1.33
   5   3  10   25.07    1.24
  -5   3 -10   25.89    1.44
   6  -3  10    6.13    1.05
   6  -3  10    5.42    0.87
   6   3  10    6.18    0.56
  -6   3 -10    6.64    0.66
   6   3  10    6.33    0.72
   6   3  10    6.07    0.62
   7  -3  10    8.47    0.87
  -7   3 -10    8.13    0.57
   7   3  10    7.03    0.51
   7   3  10    7.50    0.69
  -8  -4  10    8.37    0.78
   8   4 -10    8.34    0.56
  -8   4  10    9.44    0.70
   8   4 -10    8.78    0.95
   7  -4 -10    2.76    1.11
  -7  -4  10    2.42    0.52
  -7   4  10    1.19    0.57
   7   4 -10    0.88    0.85
   7   4 -10    2.03    0.62
   7   4 -10    2.77    0.50
  -7   4  10    1.86    0.52
   7   4 -10    2.04    0.46
   7   4 -10    2.60    0.44
   6  -4 -10   10.70    1.92
  -6  -4  10   13.34    1.19
  -6  -4  10   12.96    1.11
   6   4 -10   11.75    1.01
   6   4 -10   11.81    1.37
   6   4 -10    9.67    1.69
  -6   4  10   12.96    1.09
  -6   4  10   13.53    1.11
   6   4 -10   12.98    0.99
  -6   4  10   12.88    1.14
   6   4 -10   15.41    1.14
  -5  -4  10    6.25    0.85
  -5  -4  10    7.68    0.96
   5   4 -10    6.44    1.06
  -5   4  10    5.78    0.79
  -5   4  10    4.24    0.70
  -5   4  10    6.02    0.91
   5   4 -10    4.76    0.68
   5   4 -10    6.10    0.85
   5   4 -10    4.87    0.74
   5   4 -10    5.75    0.73
   5   4 -10    4.57    1.31
  -4  -4  10   28.10    1.85
  -4  -4  10   28.36    1.87
  -4  -4  10   29.51    2.13
  -4   4  10   28.12    1.63
  -4   4  10   27.35    1.55
   4   4 -10   27.70    1.81
   4   4 -10   26.65    2.00
   4   4 -10   27.92    1.65
   4   4 -10   24.86    2.75
   4   4 -10   26.02    1.55
   4   4 -10   26.69    1.67
  -3  -4  10    4.88    0.83
  -3  -4  10    5.61    1.20
  -3  -4  10    5.34    0.89
   3   4 -10    3.50    1.25
   3   4 -10    5.08    0.72
   3   4 -10    6.43    1.15
  -3   4  10    4.08    0.61
  -3   4  10    4.89    0.72
   3   4 -10    5.55    0.88
   3   4 -10    6.44    0.87
   3   4 -10    5.33    0.88
  -2  -4  10   37.41    2.22
  -2  -4  10   31.99    2.45
  -2  -4  10   37.87    2.17
   2   4 -10   36.82    3.35
   2   4 -10   39.98    1.98
   2   4 -10   37.24    2.22
  -2   4  10   36.69    1.90
   2   4 -10   38.84    2.13
   2   4 -10   38.16    2.32
  -2   4  10   37.35    1.78
  -1  -4  10    8.52    1.10
  -1  -4  10    7.08    1.31
   1   4 -10    5.91    0.95
   1   4 -10    3.27    1.18
  -1   4  10    7.97    0.72
   1   4 -10    4.59    0.91
   1   4 -10    7.72    0.86
  -1   4  10    5.81    0.72
   1   4 -10    8.30    1.07
   0  -4  10   40.68    2.48
   0  -4  10   43.50    2.76
   0   4  10   42.36    1.83
   0   4  10   44.61    2.01
   0   4 -10   43.58    2.36
   0   4 -10   42.43    2.56
   0   4 -10   40.44    3.48
   0   4 -10   43.17    2.49
   1  -4  10    2.98    0.94
   1  -4  10    4.78    0.83
  -1   4 -10    2.31    0.97
  -1   4 -10    2.88    0.74
  -1   4 -10    3.89    0.87
   1   4  10    4.05    0.52
   1   4  10    3.43    0.43
   2  -4  10    6.52    0.90
   2  -4  10    6.64    1.22
   2   4  10    8.23    0.61
   2   4  10    7.49    0.69
   3  -4  10    9.74    1.04
   3  -4  10    9.66    1.35
   3   4  10   10.18    0.77
   4  -4  10   12.65    0.98
   4  -4  10   11.05    1.26
   4   4  10   10.46    0.77
   4   4  10   11.18    0.94
   5  -4  10    2.99    0.43
   5   4  10    4.01    0.49
   5   4  10    3.45    0.58
  -5  -5  10   10.44    0.86
   5   5 -10   11.11    0.91
  -5   5  10   10.90    0.72
  -5   5  10    8.93    0.79
  -5   5  10   10.47    0.98
   5   5 -10    7.93    0.69
  -4  -5  10    0.28    0.45
  -4  -5  10    1.00    0.50
  -4   5  10    0.77    0.33
   4   5 -10    0.91    0.46
  -4   5  10    1.12    0.40
   4   5 -10    1.04    0.72
   4   5 -10    0.49    0.36
   4   5 -10    0.69    0.31
   4   5 -10    0.63    0.31
  -3  -5  10   27.02    1.54
  -3  -5  10   24.37    1.51
   3   5 -10   26.92    1.31
   3   5 -10   27.73    1.41
  -3   5  10   24.90    1.17
   3   5 -10   26.58    1.69
   3   5 -10   25.39    1.36
  -3   5  10   26.71    1.37
   2   5 -10    2.53    0.87
   2   5 -10    5.12    0.60
   2   5 -10    5.92    0.83
   2   5 -10    4.88    0.63
  -2   5  10    5.77    0.48
  -2   5  10    5.79    0.63
   2   5 -10    5.31    0.66
  -1  -5  10    2.32    0.78
   1   5 -10    4.16    0.61
  -1   5  10    4.05    0.49
   1   5 -10    2.22    0.80
   1   5 -10    4.03    0.74
   1   5 -10    4.38    0.65
   0  -5  10    2.39    0.67
   0  -5  10    2.39    0.95
   0   5  10    2.61    0.40
   0   5 -10    1.01    0.66
   0   5 -10    2.14    0.51
   0   5 -10    2.89    0.56
   0   5 -10    1.79    0.60
   1  -5  10   15.07    1.21
  -1   5 -10   16.33    1.36
  -1   5 -10   16.55    1.08
   1   5  10   14.68    0.81
  -1   5 -10   16.26    1.16
   2  -5  10    4.98    0.69
  -2   5 -10    6.28    0.70
  -2   5 -10    5.05    0.68
  -2   5 -10    4.86    0.83
   3  -5  10   10.41    0.83
  -3   5 -10    9.73    0.81
  -3   5 -10   10.47    1.09
  -3   5 -10   10.98    0.89
  10   0 -11    0.23    0.59
  -9   0  11   19.23    0.96
   9   0 -11   19.08    1.15
  -8   0  11    0.03    0.38
   8   0 -11    0.30    0.47
   8   0 -11   -0.01    1.16
   7   0 -11   17.44    1.39
   7   0 -11   17.94    2.44
  -7   0  11   16.64    1.08
   6   0 -11    0.35    0.67
   6   0 -11    0.40    1.10
  -6   0  11    0.68    0.44
   5   0 -11    0.57    1.13
  -5   0  11    1.99    0.55
  -5   0  11    1.53    0.47
  -5   0  11    1.97    0.93
  -4   0  11    0.30    0.48
  -4   0  11    1.70    0.92
   4   0 -11    0.52    1.12
  -4   0  11   -0.12    0.42
  -3   0  11   51.09    2.48
  -3   0  11   48.73    2.17
  -3   0  11   51.48    2.90
   3   0 -11   53.31    4.33
  -2   0  11   26.05    1.60
  -2   0  11   25.66    1.77
   2   0 -11   25.47    2.94
  -2   0  11   25.95    1.26
  -1   0  11    8.74    1.08
  -1   0  11    6.90    1.04
  -1   0  11    9.36    1.02
   1   0 -11    5.96    1.67
   0   0  11    0.87    0.58
   0   0  11    1.46    0.64
   0   0  11   -0.12    0.62
   1   0  11   58.05    3.24
   1   0  11   62.30    3.03
  -1   0 -11   61.28    2.99
   1   0  11   58.75    2.88
   1   0  11   58.11    2.77
   2   0  11    0.13    0.55
   2   0  11    1.28    0.54
   2   0  11   -0.76    0.56
   2   0  11   -0.12    0.84
  -2   0 -11    0.37    0.56
   3   0  11   27.26    1.66
   3   0  11   27.25    2.10
   3   0  11   28.65    1.74
   3   0  11   27.13    1.67
   4   0  11   -0.29    0.66
   4   0  11    0.48    0.46
   4   0  11    0.44    0.43
   5   0  11   20.23    1.68
   5   0  11   19.64    1.24
   6   0  11    0.73    0.39
   6   0  11    1.16    0.60
   7   0  11   13.85    1.16
   7   0  11   14.93    0.83
   8   0  11    4.31    0.57
 -10  -1  11   16.78    0.92
  10  -1 -11   17.40    1.00
  10   1 -11   15.77    1.30
   9  -1 -11   -0.34    0.40
   9  -1 -11    0.14    1.02
  -9  -1  11    0.17    0.37
   9   1 -11    0.27    0.58
  -8  -1  11   13.55    1.01
   8  -1 -11   12.47    1.20
   8  -1 -11   12.21    2.13
   8   1 -11   10.32    1.94
   8   1 -11   12.17    0.87
   8   1 -11   14.06    1.61
  -8   1  11   13.17    1.45
  -7  -1  11    1.91    0.56
   7  -1 -11    4.27    1.46
   7   1 -11    4.84    0.62
  -7   1  11    3.48    0.60
  -7   1  11    3.23    0.88
  -7   1  11    1.45    0.70
   7   1 -11    3.69    1.33
  -6  -1  11   34.49    1.80
   6  -1 -11   34.70    3.42
  -6   1  11   31.43    1.78
   6   1 -11   26.04    3.07
   6   1 -11   31.86    1.78
  -6   1  11   33.54    2.16
  -6   1  11   31.49    1.97
   5  -1 -11    2.06    1.31
  -5  -1  11    1.93    0.61
   5   1 -11    1.07    1.18
  -5   1  11    1.85    0.59
   5   1 -11    2.31    0.65
  -5   1  11    2.01    0.70
  -5   1  11    3.60    0.84
  -5   1  11    2.02    0.76
  -4  -1  11   43.22    2.23
   4  -1 -11   48.22    4.17
  -4   1  11   46.99    2.42
   4   1 -11   45.00    2.38
  -4   1  11   48.15    2.60
   4   1 -11   46.93    4.05
  -4   1  11   47.12    2.41
  -4   1  11   44.24    2.48
   3  -1 -11    6.62    1.79
  -3  -1  11    5.92    0.78
   3   1 -11    5.66    1.62
   3   1 -11    4.35    0.84
  -3   1  11    6.05    0.94
  -3   1  11    5.56    0.88
  -3   1  11    4.97    0.84
  -3   1  11    6.56    0.87
   2  -1 -11   25.89    2.99
  -2  -1  11   24.79    1.54
   2  -1 -11   24.13    2.10
  -2  -1  11   25.95    1.56
  -2   1  11   28.22    1.78
   2   1 -11   28.30    2.97
  -2   1  11   27.29    1.83
  -2   1  11   26.70    1.64
  -2   1  11   25.09    1.62
  -2   1  11   29.20    1.72
   1  -1 -11   20.53    1.73
  -1  -1  11   18.60    1.32
  -1  -1  11   18.67    1.27
   1  -1 -11   18.61    2.54
   1  -1 -11   20.48    1.40
  -1  -1  11   13.67    1.75
  -1   1  11   20.83    1.49
   1   1 -11   20.47    2.49
  -1   1  11   19.12    1.33
  -1   1  11   19.54    1.34
  -1   1  11   19.24    1.60
  -1   1  11   22.43    1.47
   0  -1 -11   52.69    2.61
   0  -1 -11   53.36    3.11
   0  -1  11   51.61    2.31
   0  -1  11   47.03    2.92
   0  -1  11   54.05    2.49
   0   1  11   51.17    2.34
   0   1  11   56.66    2.55
   0   1  11   51.76    2.54
   0   1 -11   54.28    4.49
   0   1  11   48.00    2.45
   1  -1  11    8.77    1.02
  -1  -1 -11    9.83    1.24
   1  -1  11    8.39    0.88
   1  -1  11    8.60    1.16
  -1  -1 -11    9.88    0.99
   1   1  11   12.15    1.10
   1   1  11    9.62    0.96
   1   1  11    8.73    1.01
   1   1  11   10.68    0.89
   1   1  11   10.45    1.23
  -2  -1 -11   32.20    2.17
  -2  -1 -11   29.07    1.76
   2  -1  11   25.13    2.01
   2   1  11   29.62    1.72
   2   1  11   30.87    1.57
   2   1  11   27.90    1.95
   2   1  11   31.50    1.74
   3  -1  11    4.19    0.89
  -3  -1 -11    6.64    0.86
   3  -1  11    5.13    0.92
   3   1  11    4.42    0.81
   3   1  11    5.26    0.74
   3   1  11    4.61    0.63
   3   1  11    3.80    0.78
   4  -1  11   21.89    1.57
   4  -1  11   22.80    1.59
   4  -1  11   20.94    1.85
   4   1  11   23.29    1.45
   4   1  11   21.30    1.42
   4   1  11   22.50    1.20
   4   1  11   22.56    1.57
   4   1  11   21.76    1.60
   5  -1  11    1.99    0.55
   5  -1  11    1.02    0.75
   5  -1  11    1.71    0.58
   5   1  11    0.96    0.35
   5   1  11    1.17    0.51
   5   1  11    0.70    0.46
   5   1  11    1.41    0.56
   6  -1  11   12.38    1.34
   6  -1  11   11.91    1.45
   6  -1  11   14.24    0.98
   6  -1  11   14.18    1.12
   6   1  11   13.38    1.07
   6   1  11   13.93    1.11
   7  -1  11    7.72    1.00
   7  -1  11    7.79    0.79
   7   1  11    7.13    0.65
   7   1  11    6.95    0.76
   7   1  11    7.00    0.71
   8  -1  11   14.89    1.11
   8  -1  11   15.60    0.81
  -8   1 -11   15.03    1.06
 -10  -2  11    0.51    0.32
  10  -2 -11    0.06    0.30
  10   2 -11    0.65    0.43
 -10   2  11    0.93    0.36
  10   2 -11   -0.22    0.38
 -10   2  11    0.36    0.39
  10   2 -11    0.24    0.27
  -9  -2  11   16.43    1.09
   9  -2 -11   17.01    1.20
   9  -2 -11   13.74    1.95
  -9   2  11   16.01    1.19
   9   2 -11   18.27    1.33
   9   2 -11   14.36    1.31
   9   2 -11   16.39    1.17
  -9   2  11   16.64    1.11
  -9   2  11   16.61    0.97
  -8  -2  11    0.50    0.48
   8  -2 -11   -0.16    0.98
   8   2 -11    0.40    0.54
  -8   2  11    0.26    0.44
   8   2 -11    1.04    1.04
  -8   2  11    0.85    0.47
  -8   2  11    0.66    0.45
  -8   2  11   -0.35    0.46
  -7  -2  11   32.57    1.86
   7  -2 -11   32.05    3.26
  -7   2  11   34.26    1.81
  -7   2  11   33.54    1.95
   7   2 -11   30.43    3.08
   7   2 -11   37.25    2.23
  -7   2  11   31.75    1.75
  -7   2  11   33.63    1.77
  -6  -2  11    4.29    0.79
   6  -2 -11    4.95    1.63
  -6   2  11    3.52    0.70
   6   2 -11    5.04    1.00
  -6   2  11    3.66    0.67
  -6   2  11    4.63    0.73
  -6   2  11    4.97    0.69
   6   2 -11    4.59    1.46
   6   2 -11    4.09    0.55
  -5  -2  11   29.01    1.76
   5  -2 -11   27.91    3.10
  -5   2  11   26.88    1.75
   5   2 -11   24.45    2.80
   5   2 -11   28.58    1.51
  -5   2  11   27.90    1.60
  -5   2  11   28.01    1.72
  -5   2  11   25.54    1.50
  -4  -2  11    8.26    1.04
   4  -2 -11    7.97    1.94
  -4   2  11    8.59    0.96
  -4   2  11    9.47    1.09
   4   2 -11    6.56    1.54
   4   2 -11    7.90    0.87
  -4   2  11    8.17    0.91
  -4   2  11    7.32    0.96
  -4   2  11    7.48    0.75
  -4   2  11    7.18    0.99
   3  -2 -11   10.62    2.14
  -3  -2  11    9.32    1.15
  -3   2  11   13.35    1.37
  -3   2  11   10.76    0.98
  -3   2  11   10.61    1.11
  -3   2  11   11.69    1.17
   3   2 -11   12.32    1.07
   3   2 -11   12.54    1.98
   2  -2 -11    8.35    1.32
   2  -2 -11   11.52    2.15
  -2  -2  11    9.31    1.12
   2   2 -11    6.26    0.85
   2   2 -11    8.48    1.74
  -2   2  11    8.73    1.01
  -2   2  11    7.89    0.93
  -2   2  11    8.17    0.83
   1  -2 -11   63.47    3.07
  -1  -2  11   62.81    2.96
   1  -2 -11   66.85    3.71
   1  -2 -11   63.10    5.08
   1   2 -11   65.91    4.89
  -1   2  11   63.65    2.61
  -1   2  11   67.97    2.93
  -1   2  11   69.43    2.95
   1   2 -11   62.79    3.03
   0  -2  11   23.91    1.56
   0  -2 -11   23.93    1.56
   0   2  11   28.32    1.59
   0   2 -11   28.06    2.84
   0   2  11   26.13    1.60
   0   2 -11   28.15    1.74
   0   2  11   26.49    1.31
   0   2  11   28.97    1.59
  -1  -2 -11    6.41    0.84
   1  -2  11    7.29    0.92
   1  -2  11    7.78    1.28
   1   2  11    8.03    0.86
   1   2  11    8.49    0.87
   1   2  11    8.80    0.69
   1   2  11    8.88    1.01
  -1   2 -11    9.00    1.12
   2  -2  11    1.75    0.93
   2  -2  11    1.83    0.56
   2  -2  11    4.24    1.03
  -2  -2 -11    2.39    0.65
   2   2  11    2.25    0.58
  -2   2 -11    3.04    0.73
   2   2  11    1.96    0.51
   2   2  11    2.63    0.57
   3  -2  11   46.84    2.83
   3  -2  11   42.27    2.69
   3  -2  11   44.79    2.01
   3   2  11   44.48    2.18
  -3   2 -11   43.65    2.35
   3   2  11   42.90    2.11
   3   2  11   44.48    2.14
   4  -2  11   11.62    1.39
   4  -2  11    9.41    1.27
   4   2  11   11.72    0.95
   4   2  11   11.70    0.92
  -4   2 -11   11.20    1.18
   4   2  11   11.24    0.90
   5  -2  11   22.68    1.60
   5  -2  11   23.17    1.85
   5   2  11   24.32    1.33
  -5   2 -11   20.52    1.47
   5   2  11   22.10    1.26
   6  -2  11   -0.17    0.43
   6  -2  11    0.44    0.55
   6  -2  11    0.47    0.62
  -6   2 -11    0.47    0.45
   6   2  11    0.55    0.36
   6   2  11    0.61    0.37
   7  -2  11    8.53    0.67
   7  -2  11    7.41    0.84
   7   2  11    8.05    0.65
   7   2  11    6.88    0.68
  -7   2 -11    8.73    0.76
  -9  -3  11   -0.09    0.37
   9  -3 -11    0.85    0.43
   9   3 -11    0.92    0.50
   9   3 -11    0.22    0.33
  -9   3  11    0.08    0.24
   9   3 -11   -0.23    0.33
  -8  -3  11   13.16    1.06
   8  -3 -11   12.46    1.84
   8   3 -11   14.34    1.37
  -8   3  11   14.53    0.86
   8   3 -11   14.20    0.86
  -8   3  11   13.14    0.89
   8   3 -11   15.57    1.06
   8   3 -11   14.73    1.17
  -8   3  11   14.42    0.83
   7  -3 -11    0.96    1.04
  -7  -3  11    0.24    0.56
  -7   3  11    0.55    0.35
   7   3 -11    1.56    0.50
  -7   3  11    1.26    0.38
  -7   3  11    1.31    0.45
   7   3 -11    1.45    1.02
   7   3 -11    1.67    0.58
   7   3 -11    1.55    0.59
  -6  -3  11   10.67    1.06
  -6  -3  11   10.17    1.18
   6  -3 -11   10.69    1.94
   6   3 -11   12.16    1.10
   6   3 -11    8.69    1.71
  -6   3  11   11.84    1.12
   6   3 -11   12.74    1.30
  -6   3  11   13.88    1.11
  -6   3  11   11.21    0.81
   6   3 -11   13.03    1.21
   5  -3 -11    5.02    1.57
  -5  -3  11    3.91    0.68
  -5  -3  11    5.17    0.86
  -5   3  11    4.04    0.77
   5   3 -11    2.25    0.77
  -5   3  11    4.90    0.55
   5   3 -11    4.99    0.83
  -5   3  11    5.07    0.80
   5   3 -11    3.49    1.27
  -5   3  11    4.43    0.76
   5   3 -11    3.86    0.83
   4  -3 -11   40.27    3.86
  -4  -3  11   48.14    2.33
  -4  -3  11   47.23    2.39
  -4   3  11   44.03    1.79
   4   3 -11   43.62    2.56
   4   3 -11   39.58    3.66
  -4   3  11   45.23    2.25
  -4   3  11   43.93    2.48
  -3  -3  11    3.39    0.69
  -3  -3  11    2.73    0.78
   3  -3 -11    3.37    1.51
   3   3 -11    3.58    0.86
   3   3 -11    3.18    1.21
  -3   3  11    3.65    0.66
  -3   3  11    3.41    0.64
   2  -3 -11    8.34    1.90
  -2  -3  11    9.79    1.13
  -2   3  11   11.23    0.97
   2   3 -11   10.39    1.35
   2   3 -11    9.35    1.83
   2   3 -11   11.31    0.87
  -2   3  11   10.79    0.98
  -1  -3  11    5.19    1.10
  -1  -3  11    5.50    0.85
   1   3 -11    6.61    0.78
   1   3 -11    5.88    1.54
  -1   3  11    6.50    0.79
  -1   3  11    5.70    0.71
  -1   3  11    5.22    0.71
   1   3 -11    7.42    1.20
   0  -3  11   36.11    2.01
   0  -3  11   33.63    2.50
   0   3 -11   35.45    3.27
   0   3  11   38.12    1.81
   0   3 -11   39.25    1.88
   0   3  11   37.48    1.85
   1  -3  11    1.87    0.60
   1  -3  11    1.19    0.82
  -1   3 -11    1.49    0.50
   1   3  11    1.13    0.41
   1   3  11    1.42    0.47
   2  -3  11   22.12    1.45
   2  -3  11   22.58    1.94
  -2   3 -11   23.67    1.38
   2   3  11   21.64    1.29
   2   3  11   22.75    1.24
   3  -3  11    1.89    0.51
   3  -3  11    2.02    0.88
   3   3  11    1.99    0.47
  -3   3 -11    2.75    0.54
   3   3  11    1.90    0.44
   4  -3  11    8.38    1.15
   4  -3  11    8.05    1.20
   4  -3  11    9.02    0.77
   4   3  11   10.24    0.72
   4   3  11    9.03    0.77
  -4   3 -11    9.80    0.84
   5  -3  11    5.78    0.93
   5  -3  11    6.90    0.93
   5   3  11    6.36    0.54
  -5   3 -11    6.63    0.63
   5   3  11    6.57    0.61
   6  -3  11   30.18    1.66
  -6   3 -11   29.24    1.24
   6   3  11   29.96    1.35
  -7  -4  11    6.49    0.81
  -7   4  11    8.13    0.67
   7   4 -11    8.75    0.95
   7   4 -11    7.48    0.61
   7   4 -11    5.69    0.55
  -6  -4  11   -0.40    0.51
   6  -4 -11    1.56    0.95
  -6   4  11    0.30    0.42
  -6   4  11    0.62    0.46
   6   4 -11    1.13    0.54
  -6   4  11    0.75    0.41
   6   4 -11    0.05    0.34
   6   4 -11   -0.14    0.38
   6   4 -11    0.86    0.75
   5  -4 -11   16.39    2.15
  -5  -4  11   15.17    1.31
  -5  -4  11   16.98    1.10
  -5   4  11   17.10    1.14
  -5   4  11   17.09    1.09
   5   4 -11   11.83    1.74
  -5   4  11   16.46    1.30
   5   4 -11   16.63    1.12
   5   4 -11   15.54    0.89
   5   4 -11   16.53    1.47
   5   4 -11   17.01    1.23
   4  -4 -11    2.23    1.23
  -4  -4  11    2.46    0.55
  -4  -4  11    1.85    0.72
  -4   4  11    2.52    0.53
   4   4 -11    2.18    0.56
   4   4 -11    2.49    0.64
   4   4 -11    2.60    0.49
  -4   4  11    1.86    0.71
   4   4 -11    2.35    0.80
  -4   4  11    1.43    0.45
   4   4 -11    2.16    0.94
   3  -4 -11   23.65    2.76
  -3  -4  11   27.47    1.75
   3   4 -11   27.05    1.59
   3   4 -11   24.82    2.52
  -3   4  11   26.14    1.46
   3   4 -11   29.35    1.80
   3   4 -11   25.77    1.60
  -3   4  11   29.21    1.43
  -2  -4  11    2.45    0.67
  -2  -4  11    2.93    0.87
   2  -4 -11    2.82    1.38
  -2   4  11    3.34    0.51
  -2   4  11    2.66    0.50
   2   4 -11    3.15    0.78
   2   4 -11    2.27    0.94
   2   4 -11    3.72    0.64
   2   4 -11    3.72    0.79
  -1  -4  11    9.34    1.03
  -1  -4  11    5.84    1.09
   1   4 -11    7.34    0.95
   1   4 -11    8.99    0.99
  -1   4  11    8.26    0.69
  -1   4  11    7.91    0.74
   1   4 -11    8.12    1.06
   1   4 -11    5.11    1.25
   0  -4  11    2.31    0.86
   0  -4  11    3.18    0.68
   0   4  11    3.94    0.54
   0   4 -11    3.18    0.71
   0   4 -11    3.13    0.76
   0   4 -11    2.26    0.70
   0   4  11    3.43    0.44
   0   4 -11    2.41    0.92
   1  -4  11   14.02    1.16
   1  -4  11   11.72    1.39
  -1   4 -11   12.72    1.18
   1   4  11   13.76    0.81
   1   4  11   12.66    0.85
   2  -4  11    6.75    0.84
   2  -4  11    7.26    1.13
   2   4  11    6.78    0.63
   3  -4  11    9.58    0.82
   3   4  11    9.40    0.67
   4  -4  11   -0.32    0.23
   4   4  11    0.26    0.24
  -3  -5  11    2.33    0.51
   3   5 -11    2.15    0.34
  -3   5  11    2.16    0.36
   3   5 -11    2.48    0.33
   3   5 -11    2.40    0.49
  -2  -5  11    8.29    0.85
   2   5 -11   10.20    0.70
   2   5 -11    9.72    0.97
   2   5 -11   10.46    0.77
  -2   5  11   10.46    0.68
  -1  -5  11    1.26    0.48
   1   5 -11    1.16    0.44
   1   5 -11    2.20    0.44
  -1   5  11    1.24    0.31
   1   5 -11    1.57    0.38
   0  -5  11   17.52    1.11
   0   5  11   16.34    0.83
   0   5 -11   16.08    1.23
   0   5 -11   16.06    0.96
   0   5 -11   16.76    1.06
  10   0 -12   10.42    1.08
 -10   0  12   11.59    0.97
  -9   0  12    0.78    0.58
   9   0 -12   -0.79    0.85
   9   0 -12    0.40    0.29
   8   0 -12   32.93    1.62
  -8   0  12   30.30    1.91
   8   0 -12   26.07    2.81
   7   0 -12    1.47    1.12
  -7   0  12    2.73    0.77
   7   0 -12    2.20    0.57
  -6   0  12   21.64    1.68
   6   0 -12   19.29    1.47
   6   0 -12   18.62    2.45
  -5   0  12    3.64    0.91
  -5   0  12    3.54    0.64
   5   0 -12    2.49    1.25
  -4   0  12   10.24    1.28
  -4   0  12    9.90    1.00
   4   0 -12   10.92    2.08
  -3   0  12   37.12    1.99
  -3   0  12   39.20    2.19
  -3   0  12   38.74    2.19
   3   0 -12   37.03    3.53
   2   0 -12   31.78    3.11
  -2   0  12   29.66    1.90
  -2   0  12   28.89    1.72
  -2   0  12   29.84    1.89
  -1   0  12    1.53    0.60
  -1   0  12    0.90    0.63
  -1   0  12    0.67    0.69
   1   0 -12    2.06    1.29
   0   0  12   17.92    1.30
   0   0  12   17.32    1.40
   0   0  12   18.30    1.37
   1   0  12   14.28    1.19
   1   0  12   13.86    1.22
   1   0  12   13.31    1.16
   1   0  12   13.55    1.61
   2   0  12   27.31    2.02
   2   0  12   28.89    1.71
   2   0  12   28.67    1.64
   2   0  12   28.37    1.63
   3   0  12    1.97    0.44
   3   0  12    2.03    0.75
   3   0  12    0.68    0.49
   4   0  12   13.92    1.34
   4   0  12   10.66    0.93
   5   0  12    0.27    0.51
   5   0  12    0.31    0.34
   6   0  12   11.90    0.72
   6   0  12   12.17    1.08
   7   0  12    3.33    0.48
   9  -1 -12   19.85    1.15
  -9  -1  12   19.31    0.90
   9   1 -12   20.04    1.45
  -9   1  12   19.66    1.21
  -9   1  12   16.87    1.32
   8  -1 -12    3.33    0.64
  -8  -1  12    1.85    0.41
   8  -1 -12    3.74    1.27
  -8   1  12    1.92    0.61
   8   1 -12    1.27    1.05
   8   1 -12    2.28    0.36
  -8   1  12    2.26    0.58
   8   1 -12    1.89    0.84
  -8   1  12    1.28    0.61
   7  -1 -12   12.52    2.08
  -7  -1  12   15.19    0.97
   7  -1 -12   15.04    1.33
   7   1 -12   12.34    1.97
  -7   1  12   15.50    1.25
   7   1 -12   14.01    0.98
  -7   1  12   16.30    1.22
  -7   1  12   13.94    1.33
  -6  -1  12    3.70    0.57
   6  -1 -12    2.21    1.25
  -6   1  12    4.53    0.63
  -6   1  12    3.77    0.72
   6   1 -12    3.70    0.62
  -6   1  12    3.04    0.71
  -6   1  12    4.20    0.81
   6   1 -12    2.68    1.23
   5  -1 -12   27.33    3.10
  -5  -1  12   30.63    1.58
  -5   1  12   33.73    1.98
   5   1 -12   32.18    1.79
  -5   1  12   30.33    1.84
  -5   1  12   32.63    1.74
  -5   1  12   33.20    1.88
   5   1 -12   25.73    2.89
   4  -1 -12   11.29    2.18
  -4  -1  12   10.84    0.93
  -4   1  12   10.41    1.06
   4   1 -12    9.43    1.12
  -4   1  12   11.15    1.01
   4   1 -12   10.27    1.91
  -4   1  12    9.95    1.12
  -4   1  12   11.77    1.17
  -3  -1  12   25.80    1.40
  -3  -1  12   28.52    1.91
   3  -1 -12   23.83    2.81
   3   1 -12   20.04    2.55
  -3   1  12   23.22    1.48
   3   1 -12   23.19    1.64
  -3   1  12   23.36    1.56
  -3   1  12   20.31    1.44
   2  -1 -12    0.30    1.15
  -2  -1  12    0.21    0.42
  -2  -1  12    0.16    0.73
  -2   1  12    0.14    0.52
   2   1 -12   -0.13    0.94
  -2   1  12    0.98    0.60
  -2   1  12    0.18    0.46
   2   1 -12    0.57    0.67
   1  -1 -12    8.10    1.98
  -1  -1  12    8.54    0.78
  -1  -1  12    7.04    1.12
  -1   1  12    5.94    0.89
  -1   1  12    4.82    0.88
  -1   1  12    8.26    1.01
   1   1 -12    6.35    1.56
  -1   1  12    7.10    0.83
  -1   1  12    8.10    0.84
   0  -1  12    2.20    0.80
   0  -1 -12    2.24    0.72
   0   1  12    2.02    0.67
   0   1  12    4.10    0.77
   0   1  12    3.58    0.50
   0   1  12    2.11    0.63
   0   1  12    2.31    0.68
   0   1  12    2.30    0.57
   1  -1  12   31.43    2.03
   1   1  12   31.17    1.98
   1   1  12   28.85    1.57
   1   1  12   30.83    1.90
   1   1  12   32.69    1.82
   1   1  12   32.74    1.81
   2  -1  12    2.40    0.68
   2  -1  12    2.66    0.70
   2   1  12    1.88    0.50
   2   1  12    0.81    0.63
   2   1  12    2.15    0.54
   2   1  12    1.66    0.60
   2   1  12    0.32    0.62
   2   1  12    2.32    0.68
   3  -1  12   22.16    1.49
   3  -1  12   19.36    1.50
   3   1  12   20.91    1.46
   3   1  12   20.80    1.36
   3   1  12   20.09    1.39
   3   1  12   18.66    1.43
   3   1  12   18.75    1.07
   4  -1  12   13.95    1.60
   4  -1  12   14.72    1.12
   4  -1  12   11.77    1.16
   4   1  12   13.73    1.12
   4   1  12   14.48    0.78
   4   1  12   15.22    1.21
   4   1  12   14.05    1.12
   4   1  12   13.94    1.20
   5  -1  12   28.75    1.44
   5  -1  12   27.27    1.51
   5  -1  12   26.56    1.89
   5   1  12   24.53    1.48
   5   1  12   27.41    1.53
   5   1  12   25.35    1.48
   6  -1  12    3.25    0.51
   6  -1  12    2.89    0.72
   6   1  12    4.11    0.52
   6   1  12    2.90    0.55
   7  -1  12   10.20    0.90
   7  -1  12   10.50    0.64
  -7   1 -12    9.93    0.87
   9  -2 -12    0.95    0.42
  -9  -2  12    1.01    0.30
  -9   2  12    1.39    0.40
  -9   2  12    1.41    0.41
   9   2 -12    0.70    0.52
   9   2 -12    1.34    0.39
   8  -2 -12   20.33    2.35
  -8  -2  12   25.61    1.27
   8  -2 -12   27.73    1.56
  -8   2  12   25.17    1.39
   8   2 -12   18.14    2.14
  -8   2  12   26.62    1.35
   8   2 -12   24.91    1.52
  -7  -2  12    0.00    0.38
   7  -2 -12    0.22    0.95
  -7   2  12    0.01    0.39
  -7   2  12   -0.28    0.38
   7   2 -12    0.15    0.83
   7   2 -12   -0.14    0.46
  -7   2  12    0.37    0.40
   6  -2 -12    7.21    1.70
  -6  -2  12    8.58    0.83
  -6   2  12    7.21    0.85
  -6   2  12    5.76    0.72
  -6   2  12    7.05    0.83
   6   2 -12    6.62    0.59
   6   2 -12    8.93    1.16
   6   2 -12    5.93    1.43
   5  -2 -12    2.03    1.22
  -5  -2  12    2.68    0.58
  -5   2  12    2.85    0.56
   5   2 -12    2.90    0.87
   5   2 -12    2.66    1.12
   5   2 -12    3.69    0.53
  -5   2  12    3.85    0.66
  -5   2  12    3.67    0.63
   4  -2 -12   25.77    2.98
  -4  -2  12   28.84    1.60
  -4   2  12   28.46    1.70
  -4   2  12   28.10    1.46
   4   2 -12   28.91    1.53
   4   2 -12   21.78    2.64
  -4   2  12   29.25    1.72
  -4   2  12   27.22    1.75
   3  -2 -12    5.12    1.58
  -3  -2  12    5.75    0.76
  -3   2  12    6.33    0.71
  -3   2  12    5.89    0.87
  -3   2  12    6.56    0.86
   3   2 -12    7.02    0.86
  -3   2  12    5.25    0.75
   3   2 -12    5.25    1.34
   2  -2 -12   15.77    2.44
  -2  -2  12   16.34    1.21
  -2   2  12   17.25    1.03
  -2   2  12   17.74    1.46
  -2   2  12   17.85    1.29
   2   2 -12   17.88    2.24
  -2   2  12   17.99    1.32
   2   2 -12   18.06    1.26
  -1  -2  12    3.26    0.59
  -1   2  12    3.24    0.71
   1   2 -12    1.82    0.56
  -1   2  12    2.44    0.59
  -1   2  12    3.80    0.52
   1   2 -12    2.31    1.18
  -1   2  12    4.10    0.91
   0  -2  12   55.58    2.36
   0   2 -12   49.35    2.50
   0   2  12   49.39    2.49
   0   2  12   49.77    2.39
   0   2  12   51.33    2.01
   0   2  12   53.73    2.45
   1  -2  12    0.63    0.78
   1  -2  12    0.15    0.41
  -1   2 -12    0.38    0.51
   1   2  12    0.55    0.43
   1   2  12    0.85    0.45
   1   2  12    0.54    0.45
   2  -2  12   23.49    1.16
   2  -2  12   25.29    1.79
   2   2  12   24.88    1.43
  -2   2 -12   23.43    1.50
   2   2  12   22.86    1.36
   2   2  12   22.99    1.40
   3  -2  12   -0.19    0.74
   3  -2  12    0.20    0.56
   3   2  12    0.07    0.35
   3   2  12   -0.17    0.40
   3   2  12    0.68    0.37
  -3   2 -12    0.04    0.44
   4  -2  12   17.15    1.56
   4  -2  12   18.67    1.33
  -4   2 -12   17.17    1.24
   4   2  12   16.90    1.11
   4   2  12   16.95    1.07
   5  -2  12    2.97    0.69
   5  -2  12    3.04    0.56
   5   2  12    3.18    0.50
   5   2  12    3.78    0.50
  -5   2 -12    2.63    0.51
   6  -2  12   26.97    1.41
   6  -2  12   26.37    1.27
   6   2  12   25.13    1.20
  -6   2 -12   25.69    1.33
   6   2  12   25.20    1.20
  -8  -3  12    5.56    0.58
   8   3 -12    5.76    0.67
   8   3 -12    4.77    0.77
   8   3 -12    4.71    0.61
  -7  -3  12   20.62    1.14
   7  -3 -12   19.08    2.04
   7   3 -12   18.90    1.37
   7   3 -12   13.97    1.83
   7   3 -12   18.37    1.22
  -7   3  12   19.20    1.06
   7   3 -12   19.31    1.11
   6  -3 -12    5.18    1.40
  -6  -3  12    5.32    0.66
  -6   3  12    6.40    0.74
  -6   3  12    4.72    0.73
   6   3 -12    5.28    0.71
   6   3 -12    3.27    1.06
   6   3 -12    4.04    0.73
   6   3 -12    3.17    0.76
   5  -3 -12   24.79    2.66
  -5  -3  12   27.14    1.52
  -5   3  12   23.73    1.47
  -5   3  12   25.03    1.46
   5   3 -12   26.19    1.90
  -5   3  12   25.93    1.50
   5   3 -12   24.70    1.62
   5   3 -12   19.35    2.28
   5   3 -12   28.82    1.86
   4  -3 -12   -0.17    1.10
  -4  -3  12    0.98    0.56
  -4   3  12    0.72    0.50
  -4   3  12    1.04    0.45
  -4   3  12    1.33    0.53
   4   3 -12    0.78    0.56
   4   3 -12    0.16    0.82
  -3  -3  12   22.34    1.41
   3  -3 -12   18.26    2.43
   3   3 -12   21.23    1.58
  -3   3  12   20.21    1.43
   3   3 -12   16.27    2.14
  -3   3  12   18.88    1.22
  -3   3  12   19.44    1.27
   2  -3 -12    1.28    1.31
  -2  -3  12    1.74    0.56
  -2   3  12    2.45    0.55
   2   3 -12    2.74    1.08
   2   3 -12    1.92    0.36
  -2   3  12    2.38    0.42
   2   3 -12    3.10    0.79
  -2   3  12    2.69    0.53
  -1  -3  12   30.82    1.66
  -1   3  12   29.93    1.38
   1   3 -12   29.25    1.42
  -1   3  12   29.20    1.57
   1   3 -12   31.02    2.18
  -1   3  12   30.96    1.56
   1   3 -12   24.32    2.65
   0  -3  12    0.51    0.44
   0   3 -12    0.48    0.36
   0   3  12    0.08    0.37
   0   3  12   -0.24    0.34
   0   3 -12   -0.88    0.64
   0   3 -12   -0.65    0.77
   1  -3  12    6.84    0.81
   1  -3  12    6.04    1.10
   1   3  12    6.22    0.67
   1   3  12    8.37    0.76
  -1   3 -12    7.54    0.71
   2  -3  12    5.55    0.69
   2  -3  12    4.61    1.00
   2   3  12    5.72    0.65
   2   3  12    5.42    0.63
  -2   3 -12    4.06    0.54
   3  -3  12   24.34    1.75
   3  -3  12   23.20    1.72
   3   3  12   23.36    1.24
  -3   3 -12   22.29    1.19
   3   3  12   23.73    1.15
   4  -3  12    1.26    0.52
   4   3  12    0.47    0.32
   4   3  12    0.39    0.28
  -4   3 -12    0.23    0.25
   5  -3  12    6.66    0.81
   5   3  12    5.35    0.51
  -5  -4  12    0.61    0.41
  -5   4  12    1.05    0.39
  -5   4  12    1.41    0.41
  -5   4  12    0.50    0.38
   5   4 -12    0.33    0.38
   5   4 -12    0.78    0.40
   5   4 -12    0.72    0.57
  -4  -4  12   18.04    1.19
   4  -4 -12   16.82    2.08
  -4   4  12   18.37    1.21
   4   4 -12   19.69    1.21
   4   4 -12   19.39    1.01
   4   4 -12   20.69    1.65
   4   4 -12   19.49    1.27
  -4   4  12   19.28    1.10
   4   4 -12   14.55    1.75
  -4   4  12   20.34    1.06
   3  -4 -12    4.15    1.35
  -3  -4  12    4.81    0.63
  -3   4  12    4.85    0.64
   3   4 -12    5.15    0.63
   3   4 -12    5.04    0.69
   3   4 -12    2.38    0.83
  -3   4  12    4.89    0.60
  -3   4  12    5.09    0.60
   3   4 -12    4.37    0.72
  -2  -4  12   14.89    1.05
  -2   4  12   14.20    0.85
   2   4 -12   13.86    1.19
   2   4 -12   10.45    1.50
   2   4 -12   14.30    1.12
   2   4 -12   14.04    1.03
  -2   4  12   14.59    0.92
  -1  -4  12    5.22    0.64
   1   4 -12    3.16    0.67
   1   4 -12    1.81    0.80
   1   4 -12    3.38    0.68
   1   4 -12    3.62    0.59
  -1   4  12    3.25    0.48
  -1   4  12    3.45    0.42
   0  -4  12   26.23    1.43
   0   4  12   26.47    1.14
   0   4  12   25.16    1.27
   0   4 -12   25.13    1.66
   0   4 -12   24.89    1.52
   0   4 -12   25.92    1.53
   1  -4  12    0.50    0.35
   1   4  12    0.44    0.29
   2  -4  12    6.46    0.58
   2   4  12    5.95    0.54
   3   4  12    0.32    0.24
  -9   0  13   17.13    1.07
   8   0 -13    1.25    0.90
  -8   0  13    0.97    0.50
   8   0 -13    0.37    0.32
   7   0 -13   20.28    1.24
   7   0 -13   21.24    2.29
  -7   0  13   20.46    1.42
   6   0 -13   22.00    1.40
  -6   0  13   22.27    1.50
   6   0 -13   18.59    2.36
   5   0 -13   70.75    3.10
  -5   0  13   68.23    3.09
  -5   0  13   66.41    3.16
   5   0 -13   60.68    4.85
  -4   0  13    0.39    0.54
  -4   0  13    0.64    0.63
  -4   0  13    0.26    0.47
   4   0 -13   -0.19    0.93
  -3   0  13   13.81    1.23
   3   0 -13   14.16    2.16
  -3   0  13   12.16    1.23
  -3   0  13   14.88    1.06
   2   0 -13    1.57    1.26
  -2   0  13    0.59    0.53
  -2   0  13    1.07    0.63
  -2   0  13    1.57    0.50
  -1   0  13   19.86    1.79
  -1   0  13   20.40    1.45
  -1   0  13   23.41    1.41
  -1   0  13   22.69    1.44
   0   0  13    0.64    0.70
   0   0  13    0.36    0.54
   0   0  13    0.58    0.50
   0   0  13    0.39    0.51
   1   0  13   32.24    2.12
   1   0  13   31.00    1.69
   1   0  13   32.05    1.74
   1   0  13   31.31    1.67
   2   0  13    1.74    0.67
   2   0  13    1.06    0.34
   2   0  13    1.28    0.47
   3   0  13   19.02    1.48
   3   0  13   18.24    1.14
   4   0  13    6.85    0.66
   4   0  13    5.61    0.80
   5   0  13   26.32    1.56
   5   0  13   26.23    1.12
   6   0  13    0.47    0.28
   8  -1 -13   19.89    2.17
  -8  -1  13   21.56    1.49
   8  -1 -13   23.79    1.29
  -8   1  13   24.31    1.17
  -8   1  13   24.16    1.33
   8   1 -13   24.78    1.61
  -8   1  13   22.51    1.29
   8   1 -13   16.92    2.11
   7  -1 -13   11.70    1.00
   7  -1 -13    6.79    1.45
  -7  -1  13    7.70    1.03
  -7   1  13    9.47    0.93
  -7   1  13    9.07    0.94
   7   1 -13    8.79    1.60
   7   1 -13   10.48    0.71
  -7   1  13   10.26    0.77
   6  -1 -13   12.43    1.90
  -6  -1  13   12.43    0.73
  -6  -1  13   13.09    1.32
  -6   1  13   13.14    1.10
  -6   1  13   13.83    0.95
   6   1 -13   13.56    0.95
   6   1 -13   11.05    1.75
   5  -1 -13    0.42    1.01
  -5  -1  13    0.87    0.59
  -5  -1  13    0.21    0.32
   5   1 -13    0.77    0.44
  -5   1  13    0.62    0.43
   5   1 -13    0.50    0.93
  -5   1  13    1.49    0.57
  -5   1  13    1.14    0.46
  -4  -1  13   35.14    2.20
   4  -1 -13   31.73    3.25
  -4  -1  13   37.27    1.54
   4   1 -13   37.39    1.93
  -4   1  13   36.41    1.84
  -4   1  13   36.76    1.86
   4   1 -13   30.90    3.11
  -4   1  13   36.53    1.83
   3  -1 -13   13.17    2.16
  -3  -1  13   13.94    1.43
   3   1 -13   10.90    1.91
  -3   1  13   14.93    1.00
   3   1 -13   14.81    1.22
  -3   1  13   14.48    1.08
  -3   1  13   14.79    1.15
  -2  -1  13   28.63    1.96
   2  -1 -13   22.51    2.85
   2   1 -13   26.14    2.81
   2   1 -13   30.01    1.79
  -2   1  13   31.62    1.58
  -2   1  13   32.29    1.71
  -2   1  13   31.17    1.47
  -1  -1  13    9.65    1.18
  -1   1  13   10.21    1.03
  -1   1  13    7.59    1.01
  -1   1  13    8.49    0.84
   1   1 -13    9.09    1.09
   1   1 -13    8.63    1.75
  -1   1  13    8.09    1.10
   0  -1  13   26.03    1.74
   0  -1  13   27.58    1.78
   0   1  13   25.91    1.62
   0   1  13   27.11    1.74
   0   1  13   26.06    1.65
   0   1  13   25.85    1.65
   0   1  13   24.37    1.37
   1  -1  13    6.26    0.87
   1  -1  13    5.36    0.77
   1   1  13    4.97    0.74
   1   1  13    3.63    0.76
   1   1  13    5.94    0.67
   1   1  13    6.00    0.81
   1   1  13    2.66    0.74
   1   1  13    5.38    0.75
   2  -1  13   22.70    1.44
   2  -1  13   22.30    1.52
   2   1  13   22.06    1.11
   2   1  13   23.70    1.45
   2   1  13   21.08    1.43
   2   1  13   20.61    1.43
   2   1  13   20.95    1.46
   3  -1  13    6.45    0.99
   3  -1  13    6.63    0.73
   3  -1  13    5.30    0.76
   3   1  13    6.17    0.82
   3   1  13    7.15    0.88
   3   1  13    7.25    0.84
   3   1  13    6.10    0.75
   4  -1  13   15.06    1.01
   4  -1  13   14.19    1.37
   4  -1  13   12.02    0.82
   4   1  13   13.10    1.01
   4   1  13   13.89    1.02
  -4   1 -13   12.99    1.24
   4   1  13   12.77    0.98
   5  -1  13    3.35    0.66
   5  -1  13    4.78    0.54
  -5   1 -13    5.36    0.69
   5   1  13    5.13    0.62
   5   1  13    5.19    0.47
   8  -2 -13    5.13    0.63
  -8  -2  13    4.76    0.39
  -8   2  13    5.47    0.52
   8   2 -13    7.40    0.68
   7  -2 -13   14.55    1.91
  -7  -2  13   19.96    0.98
   7   2 -13   18.62    1.32
  -7   2  13   21.67    1.02
   7   2 -13   15.14    1.80
  -6  -2  13    0.69    0.35
   6  -2 -13   -0.30    0.86
  -6   2  13    0.79    0.39
  -6   2  13    0.74    0.39
   6   2 -13    0.29    0.53
   6   2 -13    0.46    0.79
  -5  -2  13    4.62    0.58
   5  -2 -13    4.14    1.28
   5   2 -13    7.94    1.09
  -5   2  13    5.84    0.72
   5   2 -13    2.45    1.00
   5   2 -13    5.24    0.54
  -5   2  13    6.00    0.64
  -4  -2  13   25.81    1.31
   4  -2 -13   18.97    2.48
  -4   2  13   26.07    1.46
  -4   2  13   22.37    1.51
  -4   2  13   26.33    1.23
   4   2 -13   25.80    1.30
   4   2 -13   21.79    2.42
   3  -2 -13   10.36    1.94
  -3  -2  13   14.69    0.97
  -3   2  13   14.65    0.84
   3   2 -13   10.68    1.74
  -3   2  13   14.55    1.13
  -3   2  13   13.36    1.18
  -3   2  13   17.74    1.20
   3   2 -13   14.60    1.01
  -2  -2  13    0.08    0.35
   2  -2 -13   -0.29    1.11
  -2   2  13    0.00    0.48
   2   2 -13   -0.41    0.79
  -2   2  13   -0.47    0.50
  -2   2  13   -0.04    0.32
  -2   2  13    0.18    0.47
   2   2 -13    0.24    0.39
  -1  -2  13   12.98    0.88
  -1  -2  13   14.03    1.46
   1   2 -13   12.27    1.01
  -1   2  13   12.57    1.05
  -1   2  13   12.50    1.00
  -1   2  13   11.65    1.13
   1   2 -13   10.29    1.76
  -1   2  13   11.39    1.02
   0  -2  13    0.17    0.67
   0   2  13    1.43    0.47
   0   2  13    1.20    0.50
   0   2  13    1.25    0.50
   0   2 -13    0.94    0.45
   0   2  13    1.19    0.59
   1  -2  13   34.18    2.02
   1   2  13   33.35    1.73
  -1   2 -13   33.61    1.75
   1   2  13   30.60    1.84
   1   2  13   33.39    1.67
   1   2  13   34.16    1.72
   2  -2  13    1.64    0.61
   2   2  13    2.48    0.58
   2   2  13    1.99    0.36
   2   2  13    1.46    0.49
   2   2  13    1.37    0.47
  -2   2 -13    2.04    0.51
   3  -2  13   20.75    1.36
   3  -2  13   18.34    1.43
   3   2  13   18.15    1.16
   3   2  13   20.20    1.29
   3   2  13   20.69    1.14
  -3   2 -13   19.34    1.22
   4  -2  13    0.75    0.51
   4  -2  13   -0.32    0.33
  -4   2 -13    0.08    0.31
   4   2  13   -0.15    0.32
   4   2  13    0.52    0.33
   5  -2  13    3.44    0.51
  -5   2 -13    1.81    0.35
  -6  -3  13    7.85    0.63
   6   3 -13    9.04    0.84
   6   3 -13    7.75    0.73
  -6   3  13    7.50    0.64
   6   3 -13    7.55    0.99
   5  -3 -13    2.70    1.06
  -5  -3  13    3.24    0.47
   5   3 -13    4.78    0.63
   5   3 -13    3.12    0.97
  -5   3  13    4.18    0.53
   5   3 -13    4.31    0.75
   5   3 -13    5.18    0.84
  -5   3  13    3.37    0.59
   4  -3 -13   14.69    1.97
  -4  -3  13   18.42    1.04
   4   3 -13   12.88    1.72
   4   3 -13   19.09    1.29
  -4   3  13   16.06    1.09
  -4   3  13   16.74    1.11
  -4   3  13   16.43    1.11
   3  -3 -13    6.50    1.45
  -3  -3  13    7.59    0.72
  -3   3  13    6.39    0.84
  -3   3  13    7.61    0.79
  -3   3  13    8.04    0.59
   3   3 -13    5.95    1.32
  -3   3  13    6.78    0.78
   3   3 -13    7.13    0.91
  -2  -3  13   10.88    0.80
  -2   3  13    9.21    0.81
   2   3 -13    6.63    1.39
   2   3 -13    8.88    1.14
  -2   3  13    9.70    0.97
  -2   3  13    8.57    0.81
  -1  -3  13    7.83    0.73
  -1   3  13    6.51    0.78
   1   3 -13    3.40    1.04
  -1   3  13    6.54    0.67
   1   3 -13    5.95    0.86
  -1   3  13    7.14    0.71
   0  -3  13   22.76    1.17
   0   3  13   22.07    1.26
   0   3  13   23.00    1.20
   0   3 -13   23.52    1.67
   1  -3  13   -1.35    0.66
  -1   3 -13   -0.42    0.56
   1   3  13    0.08    0.35
   1   3  13   -0.05    0.33
   2  -3  13    3.34    0.74
  -2   3 -13    6.35    0.90
   2   3  13    5.78    0.52
   2   3  13    5.51    0.61
   3  -3  13   10.79    0.93
   3   3  13    9.81    0.65
   3   3  13   10.02    0.71
  -2  -4  13    1.17    0.34
   2   4 -13    1.76    0.45
  -2   4  13    1.28    0.39
  -1  -4  13   10.72    0.72
   1   4 -13   12.37    0.96
  -1   4  13   10.91    0.73
   7   0 -14    1.85    0.39
   7   0 -14    1.69    0.86
  -7   0  14    2.33    0.43
  -7   0  14    1.63    0.52
   6   0 -14    3.10    0.52
  -6   0  14    2.42    0.64
  -6   0  14    3.41    0.52
   6   0 -14    2.10    0.95
  -5   0  14    1.78    0.59
   5   0 -14    1.80    0.92
  -5   0  14    2.04    0.55
   5   0 -14    2.70    0.58
   4   0 -14   10.81    1.17
  -4   0  14   11.10    0.95
   4   0 -14    8.95    1.67
  -4   0  14   10.43    0.99
  -3   0  14    7.87    0.89
   3   0 -14    4.23    1.26
  -3   0  14    7.78    0.81
  -2   0  14    2.52    0.51
  -2   0  14    3.17    0.62
  -2   0  14    1.51    0.50
   2   0 -14    2.04    1.12
  -2   0  14    2.33    0.76
  -1   0  14    6.21    0.66
  -1   0  14    5.20    0.87
  -1   0  14    5.25    0.62
  -1   0  14    4.74    0.73
   0   0  14   15.53    1.39
   0   0  14   16.35    0.93
   0   0  14   15.82    1.11
   1   0  14    5.83    0.88
   1   0  14    5.46    0.67
   2   0  14   31.27    1.85
   2   0  14   30.67    1.48
   3   0  14    1.48    0.35
   3   0  14    1.27    0.50
   4   0  14    0.63    0.38
   7  -1 -14   18.65    1.09
  -7  -1  14   18.32    1.19
   7   1 -14   17.78    1.48
  -7   1  14   17.73    1.01
  -6  -1  14   10.51    0.96
   6  -1 -14    9.98    0.89
   6  -1 -14    7.72    1.48
  -6   1  14    8.85    0.77
   6   1 -14    9.29    0.69
  -5  -1  14   19.02    1.37
   5  -1 -14   13.33    1.96
  -5   1  14   22.39    1.13
   5   1 -14   20.09    1.11
   5   1 -14   14.82    1.91
   4  -1 -14    1.58    1.06
  -4  -1  14    2.27    0.63
   4   1 -14    1.57    0.96
   4   1 -14    2.46    0.52
  -4   1  14    3.30    0.49
  -4   1  14    3.16    0.54
   3  -1 -14    1.68    1.14
  -3  -1  14    1.71    0.59
  -3   1  14    1.88    0.47
   3   1 -14    1.18    0.98
  -3   1  14    1.43    0.43
   3   1 -14    1.58    0.51
  -2  -1  14    7.74    0.97
  -2  -1  14    5.50    0.94
  -2   1  14    9.13    1.02
  -2   1  14   10.59    0.87
   2   1 -14    8.26    0.95
   2   1 -14    6.25    1.34
  -2   1  14    9.11    0.77
  -1  -1  14   12.94    1.11
  -1  -1  14   11.78    1.20
  -1   1  14   12.06    1.13
  -1   1  14   13.29    0.87
  -1   1  14   11.65    0.96
   1   1 -14   11.63    1.09
   0  -1  14    7.13    0.79
   0  -1  14    6.42    0.84
   0   1  14    7.00    0.83
   0   1  14    4.87    0.81
   0   1  14    5.97    0.60
   0   1  14    5.92    0.77
   0   1 -14    5.31    0.74
   1  -1  14    6.58    0.86
   1  -1  14    7.33    0.76
   1   1  14    9.03    0.84
  -1   1 -14    5.89    0.83
   1   1  14    5.81    0.74
   1   1  14    6.26    0.83
   1   1  14    7.82    0.53
   2  -1  14    9.80    0.93
   2  -1  14   10.04    0.75
   2  -1  14   10.12    1.25
   2   1  14   10.56    0.88
   2   1  14   10.10    0.92
   2   1  14   11.04    0.87
  -2   1 -14   11.53    1.00
   3  -1  14   11.08    0.84
   3  -1  14   10.32    1.18
   3   1  14   10.83    0.92
   3   1  14   12.10    0.80
  -3   1 -14   10.01    0.94
   4  -1  14    3.65    0.43
   4  -1  14    3.18    0.62
  -4   1 -14    4.30    0.56
  -6   2  14   11.95    0.57
   6   2 -14   11.45    1.03
  -5  -2  14    5.27    0.86
   5  -2 -14    4.73    1.24
  -5   2  14    6.76    0.45
   5   2 -14    5.68    0.82
   5   2 -14    3.42    0.96
  -5   2  14    6.83    0.63
   4  -2 -14    8.61    1.58
  -4  -2  14   12.64    1.21
   4   2 -14   13.65    1.38
   4   2 -14   11.22    0.63
   4   2 -14    9.42    1.48
  -4   2  14   11.34    0.83
   3  -2 -14   12.06    1.83
  -3  -2  14   17.95    1.39
   3   2 -14   15.96    0.91
  -3   2  14   16.23    1.05
  -3   2  14   15.96    1.02
  -3   2  14   15.88    1.11
   3   2 -14   12.58    1.72
  -2  -2  14    9.95    1.17
   2   2 -14    7.03    1.42
  -2   2  14   12.00    0.87
  -2   2  14   11.50    0.89
  -2   2  14    9.71    0.91
  -2   2  14    9.05    0.94
   2   2 -14   11.18    0.79
  -1  -2  14    3.36    0.75
   1   2 -14    6.70    0.64
  -1   2  14    3.83    0.60
  -1   2  14    5.19    0.64
  -1   2  14    3.84    0.63
  -1   2  14    5.51    0.61
   0  -2  14   13.73    1.11
   0   2  14   13.17    0.81
   0   2 -14   11.87    0.86
   0   2  14   12.13    0.99
   0   2  14   11.81    0.94
   0   2  14   13.22    0.96
   1  -2  14    1.34    0.48
   1   2  14    1.74    0.46
  -1   2 -14    1.36    0.39
   1   2  14    0.88    0.43
   1   2  14    0.97    0.44
   2  -2  14   10.94    0.90
   2  -2  14   12.37    1.07
  -2   2 -14   12.03    0.82
   2   2  14   11.95    0.81
   2   2  14   11.33    0.86
   2   2  14   12.20    0.90
   3  -2  14   18.00    1.10
   3  -2  14   17.37    0.98
  -3   2 -14   17.73    0.96
   4   3 -14    7.42    0.78
  -4   3  14    7.30    0.61
  -3   3  14   15.36    0.93
   3   3 -14   16.55    1.16
  -2  -3  14    4.56    0.86
   2   3 -14    5.83    0.79
  -2   3  14    4.80    0.57
  -2   3  14    5.20    0.59
  -1  -3  14    4.78    0.70
  -1   3  14    3.91    0.49
   1   3 -14    5.75    0.72
  -1   3  14    4.02    0.51
  -1   3  14    5.27    0.61
   0  -3  14    8.99    1.03
   0   3  14   10.79    0.73
   0   3  14   10.77    0.84
   0   3 -14   10.57    1.01
  -5   0  15   18.33    1.04
  -5   0  15   18.10    0.89
   5   0 -15   17.78    1.04
   4   0 -15   15.04    1.03
  -4   0  15   16.79    0.82
  -4   0  15   15.93    0.99
  -4   0  15   18.88    1.37
   4   0 -15   10.42    1.63
  -3   0  15    9.77    1.11
  -3   0  15   10.08    0.83
   3   0 -15    8.86    0.89
  -2   0  15   21.85    1.17
  -2   0  15   17.56    1.45
   2   0 -15   19.59    1.30
  -1   0  15    9.46    1.03
  -1   0  15   11.41    0.80
   0   0  15    4.60    0.53
   0   0  15    5.25    0.73
   1   0  15    0.36    0.30
   1   0  15    1.22    0.46
   2   0  15   24.19    1.38
   5  -1 -15    7.04    0.79
  -5  -1  15    7.79    0.70
   5   1 -15    8.47    0.57
  -5   1  15    9.28    0.61
  -4  -1  15    2.70    0.63
  -4  -1  15    3.28    0.51
  -4   1  15    2.51    0.52
   4   1 -15    2.03    0.39
  -4   1  15    2.28    0.37
  -3  -1  15   20.16    1.16
  -3  -1  15   17.97    1.23
   3   1 -15   18.37    1.08
  -3   1  15   19.19    0.94
  -3   1  15   18.16    1.23
  -2  -1  15    2.92    0.64
  -2  -1  15    2.82    0.49
   2   1 -15    3.41    0.51
  -2   1  15    2.30    0.54
  -2   1  15    3.21    0.37
  -2   1  15    3.12    0.44
  -1  -1  15   14.00    0.98
  -1  -1  15   12.17    0.85
  -1   1  15   11.37    0.82
   1   1 -15   13.29    0.95
  -1   1  15   13.35    0.96
   0  -1  15    6.08    0.99
   0  -1  15    7.69    0.80
   0  -1  15    8.07    0.59
   0   1  15    8.57    0.78
   0   1 -15    8.74    0.78
   1  -1  15    5.49    0.66
   1  -1  15    5.10    0.77
   1   1  15    6.76    0.62
  -1   1 -15    5.87    0.69
  -3  -2  15   19.07    1.24
  -3   2  15   20.96    1.04
   3   2 -15   19.72    1.52
  -3   2  15   22.00    1.01
  -2  -2  15    7.34    0.71
  -2   2  15    7.49    0.62
  -1  -2  15    1.71    0.46
   1   2 -15    2.28    0.29
  -1   2  15    2.53    0.41
   0   0   0    0.00    0.00
;
_shelx_hkl_checksum               55305
_olex2_submission_original_sample_id gg-7-177
_olex2_submission_special_instructions 'No special instructions were received'
